# Supplementary material for: Synthesis of diverse acyclic precursors to pyrroles for studies of prebiotic routes to tetrapyrrole macrocycles
Source: Royal Society of Chemistry journal article supplement (doi:10.1039/c6nj02048h), 2016-01-01

Supporting Information for:

**Synthesis of Diverse Acyclic Precursors to Pyrroles for  
Studies of Prebiotic Routes to Tetrapyrrole Macrocycles**

Vanampally Chandrasher, Marcin Ptaszek, Masahiko Taniguchi and Jonathan S. Lindsey

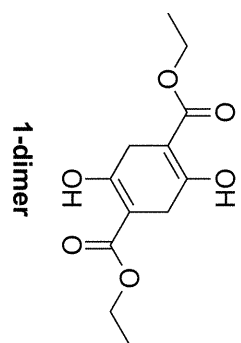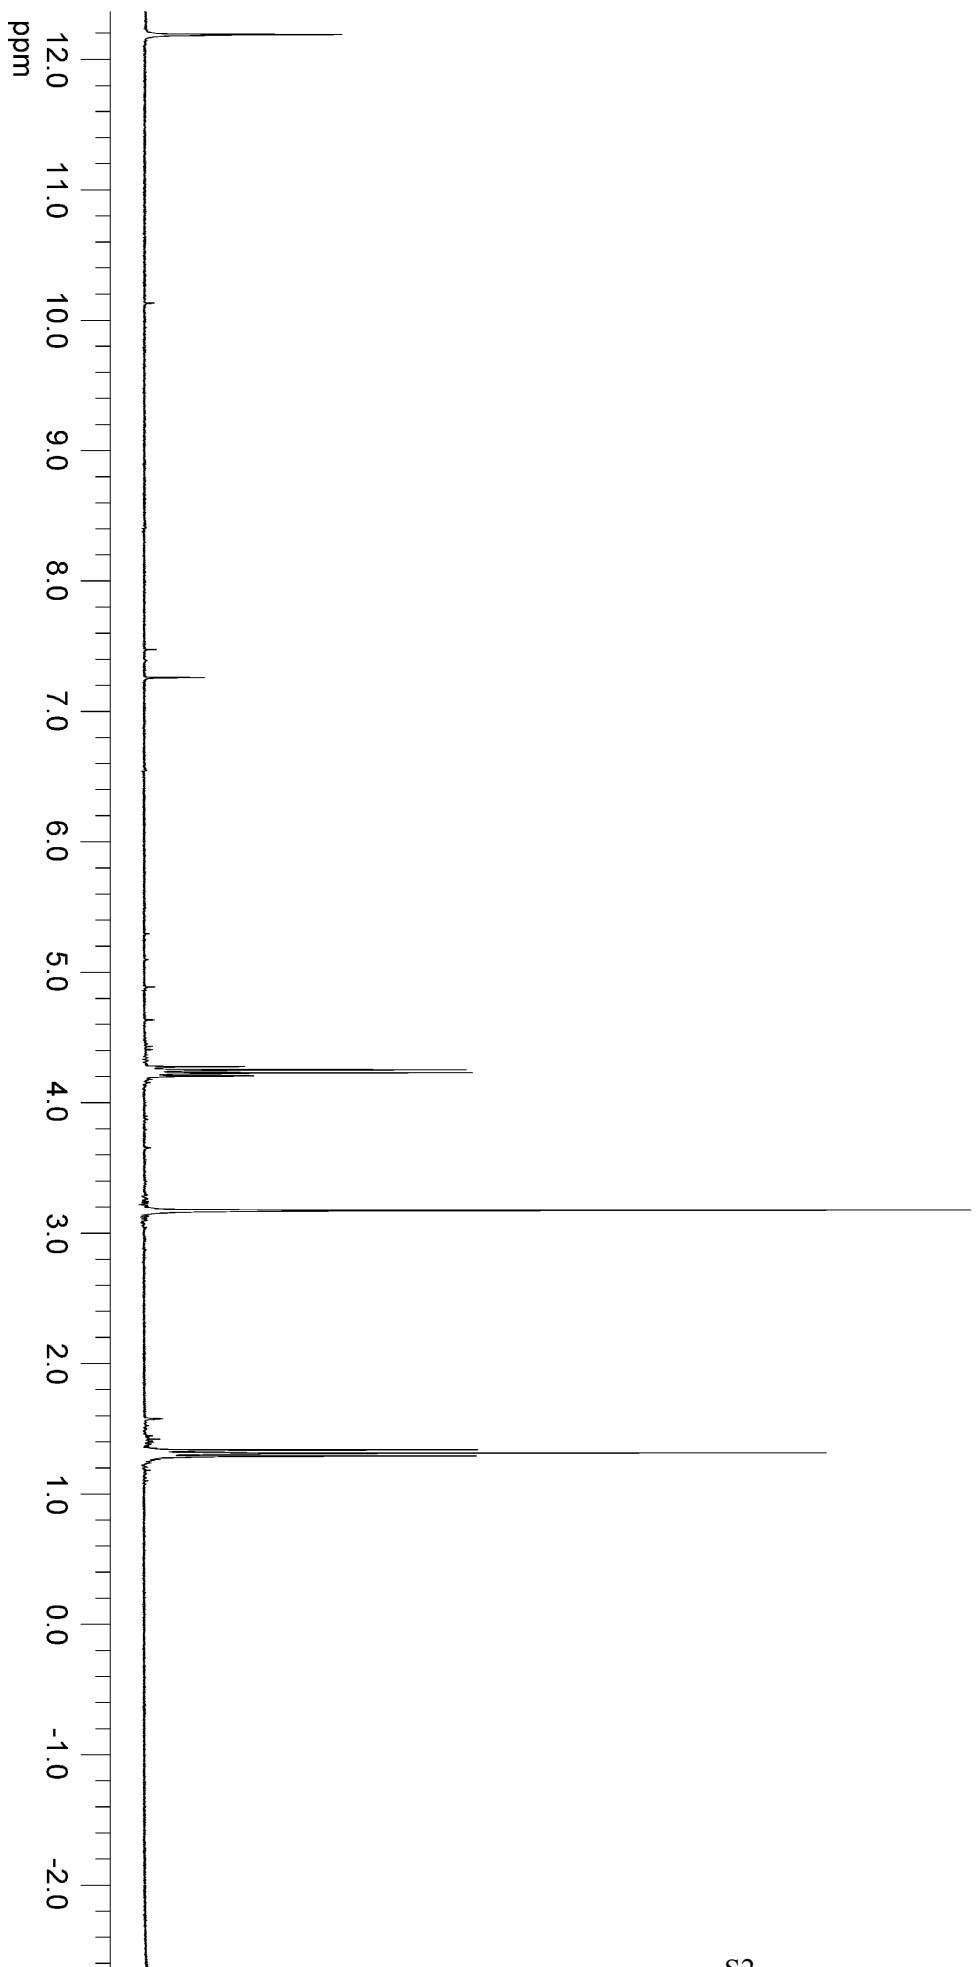

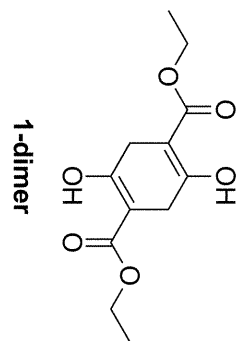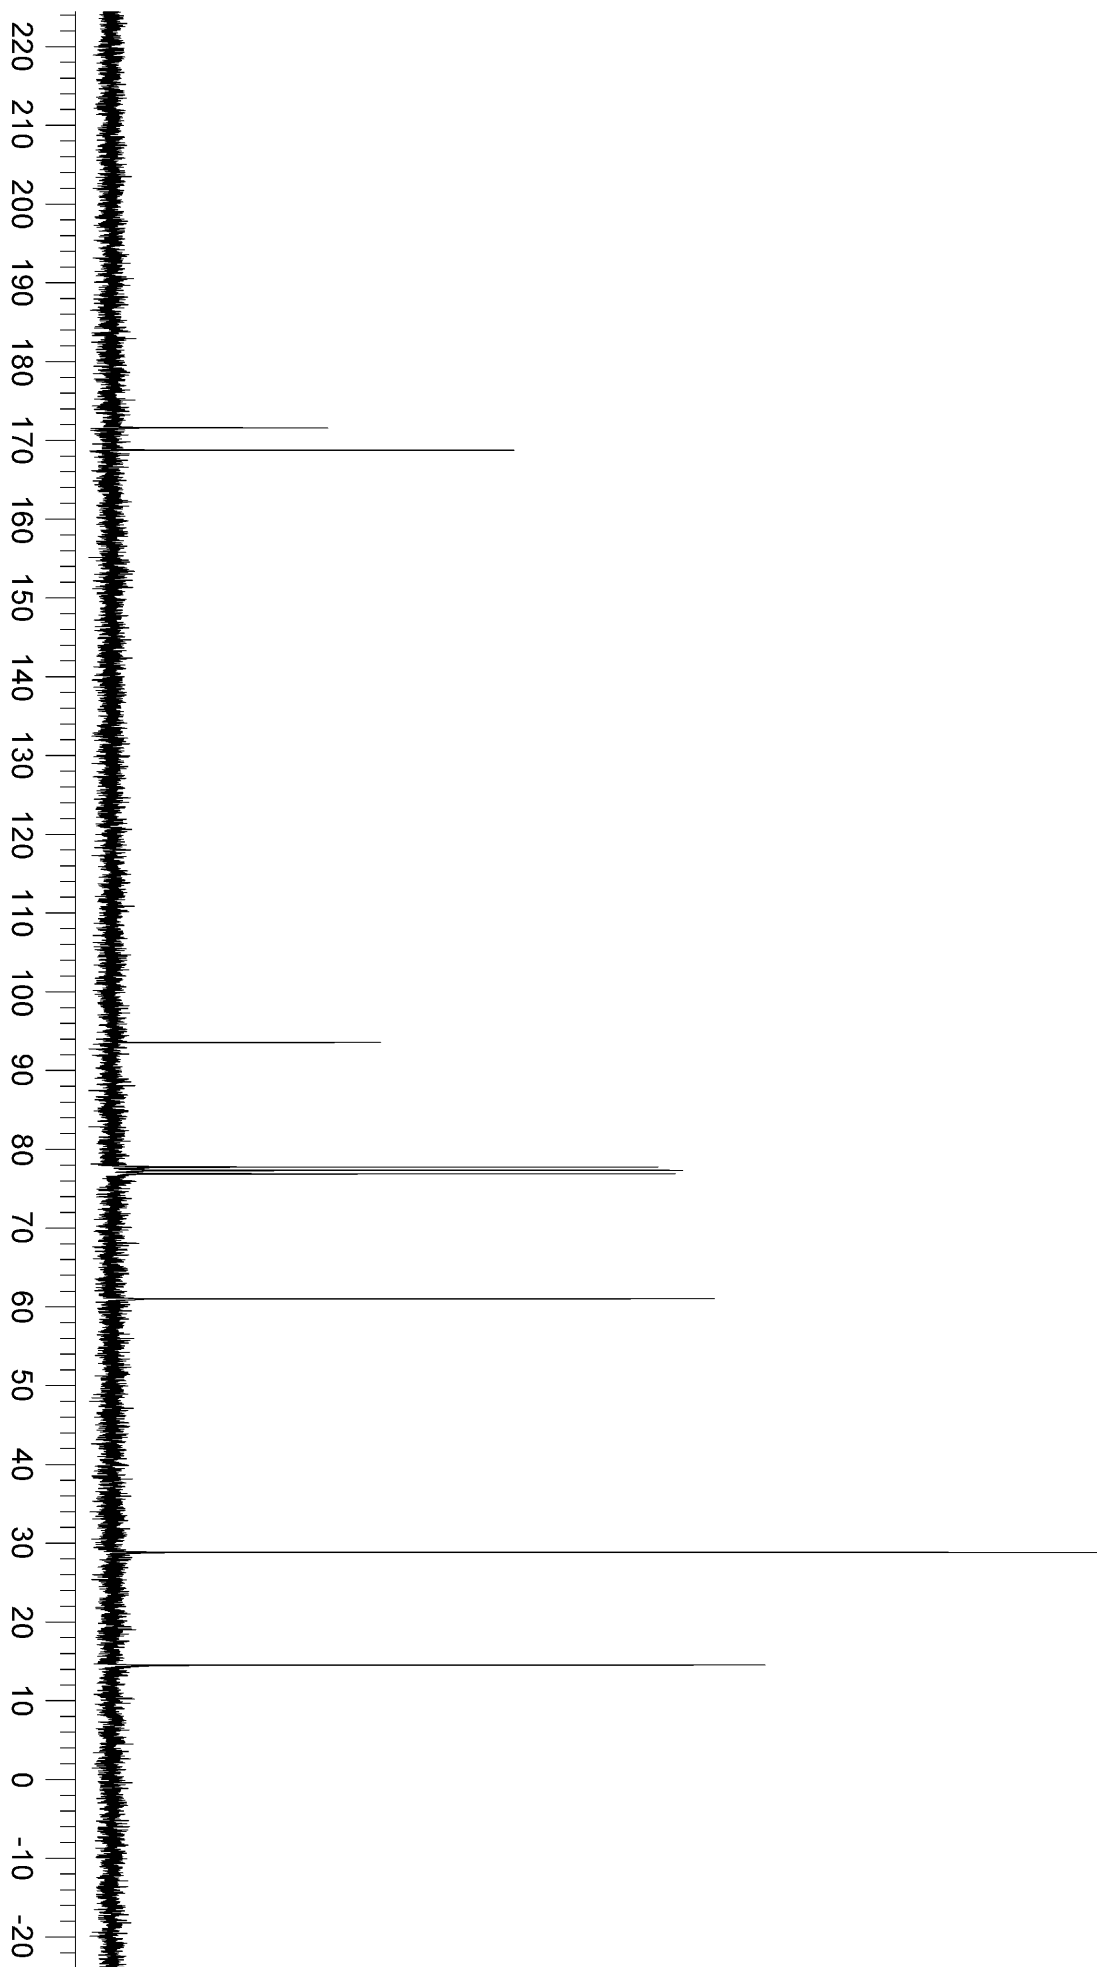

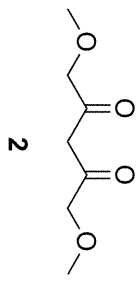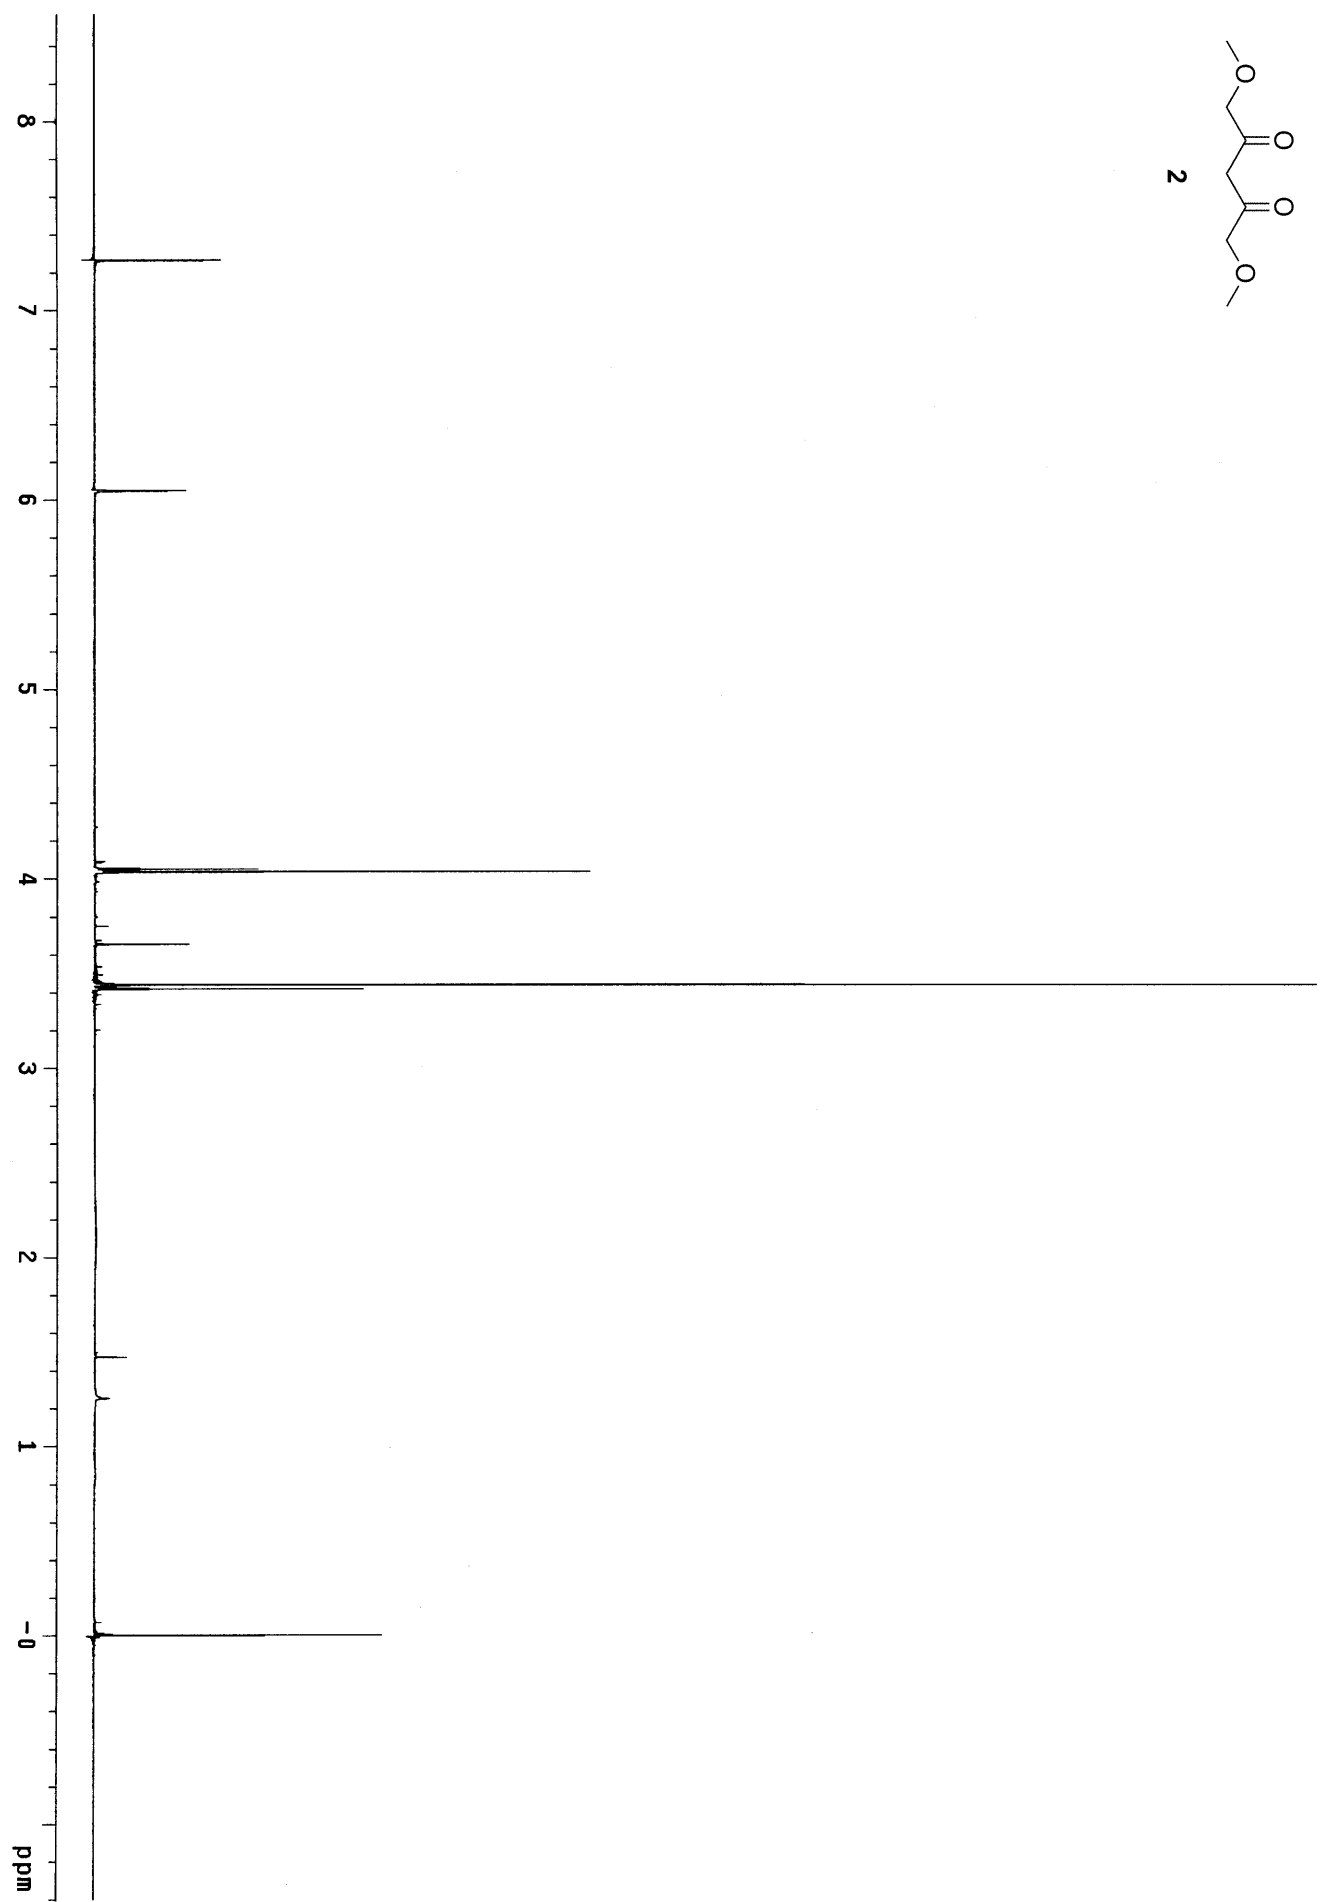

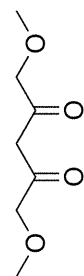

2

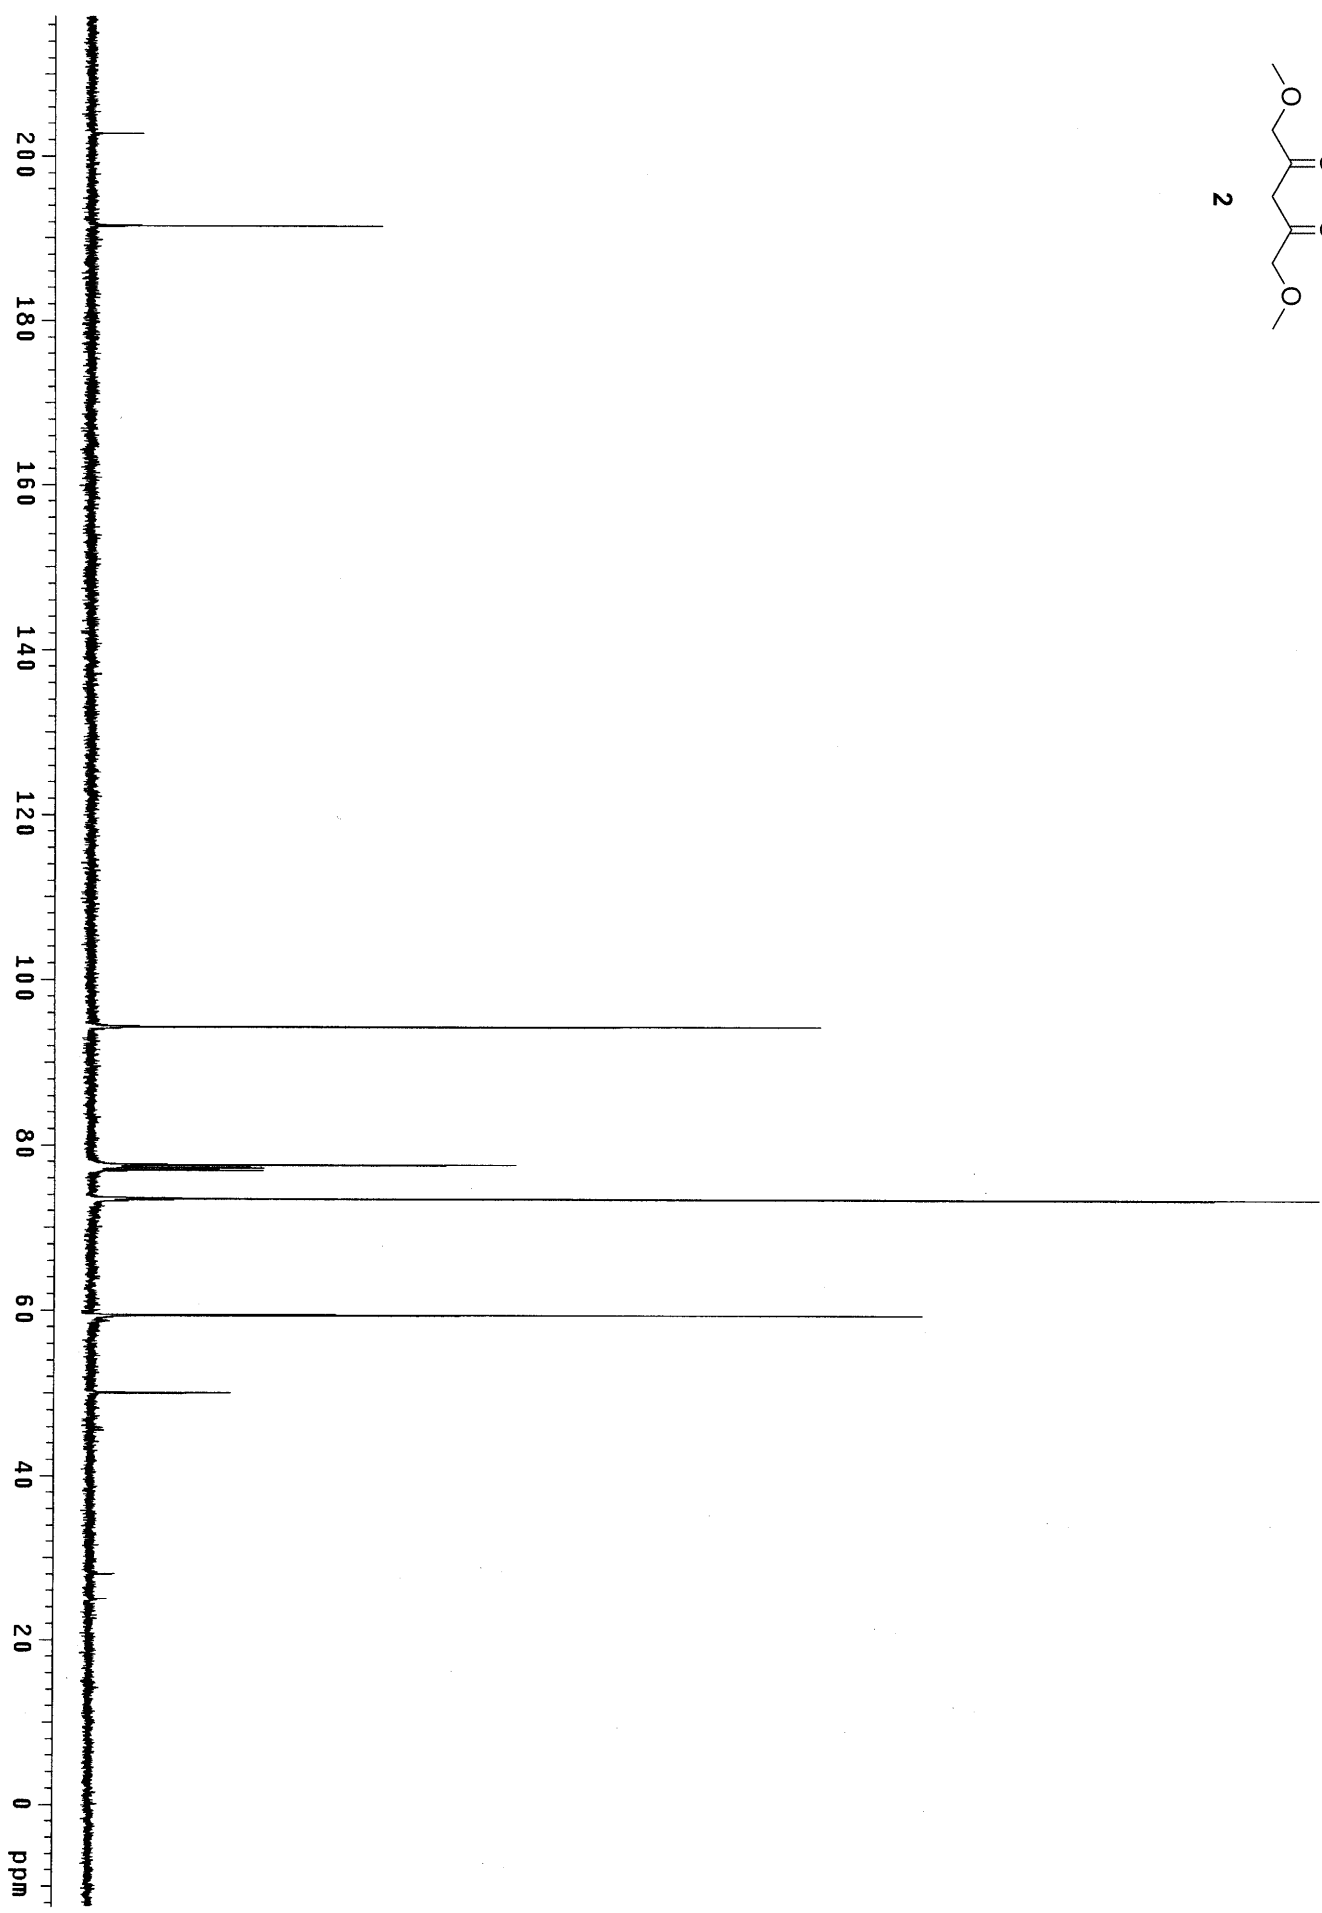

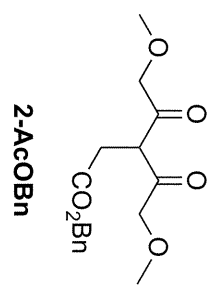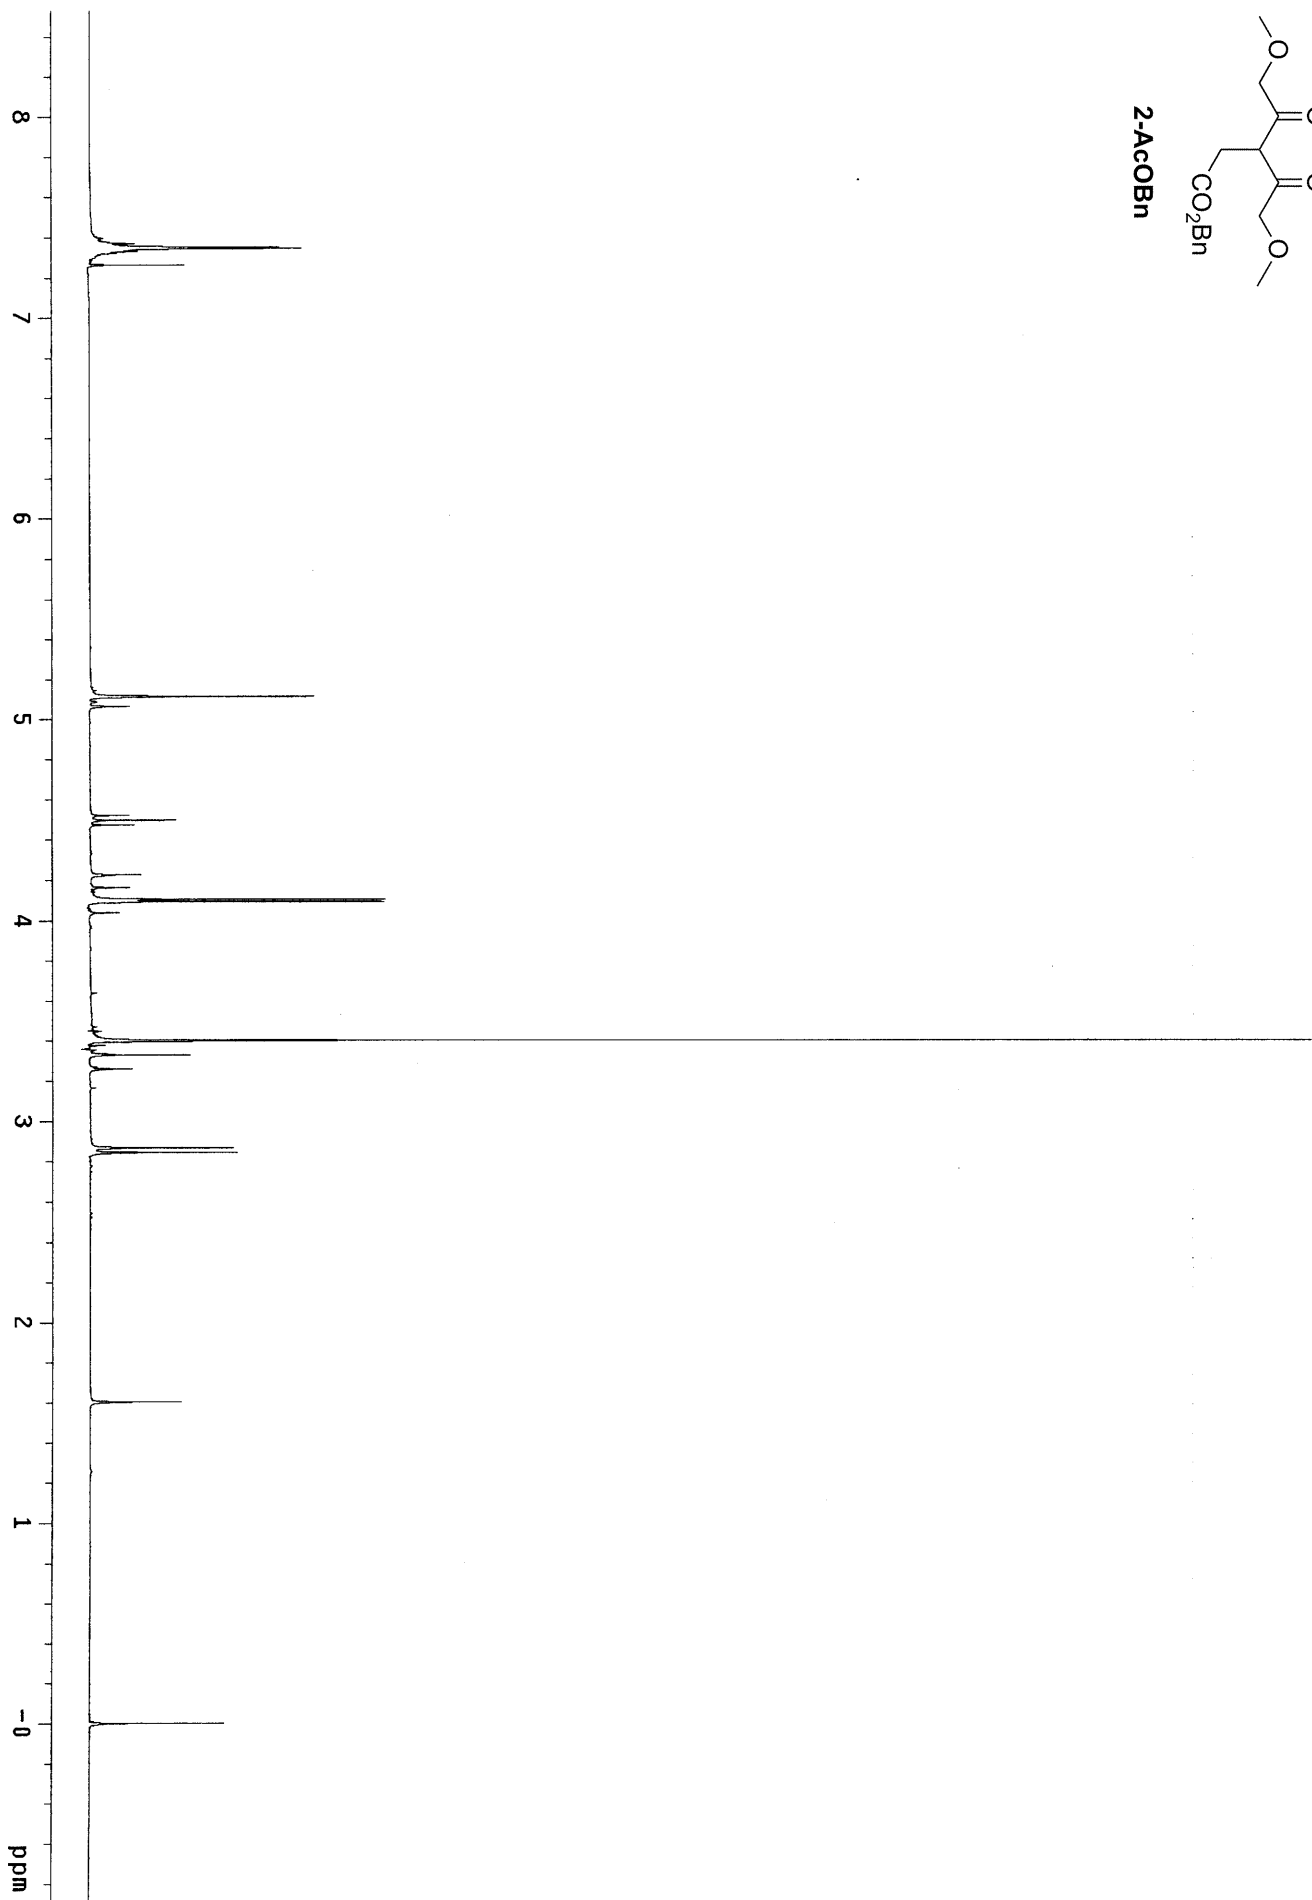

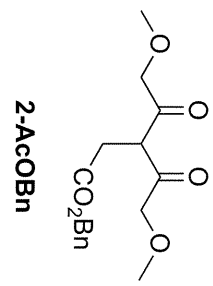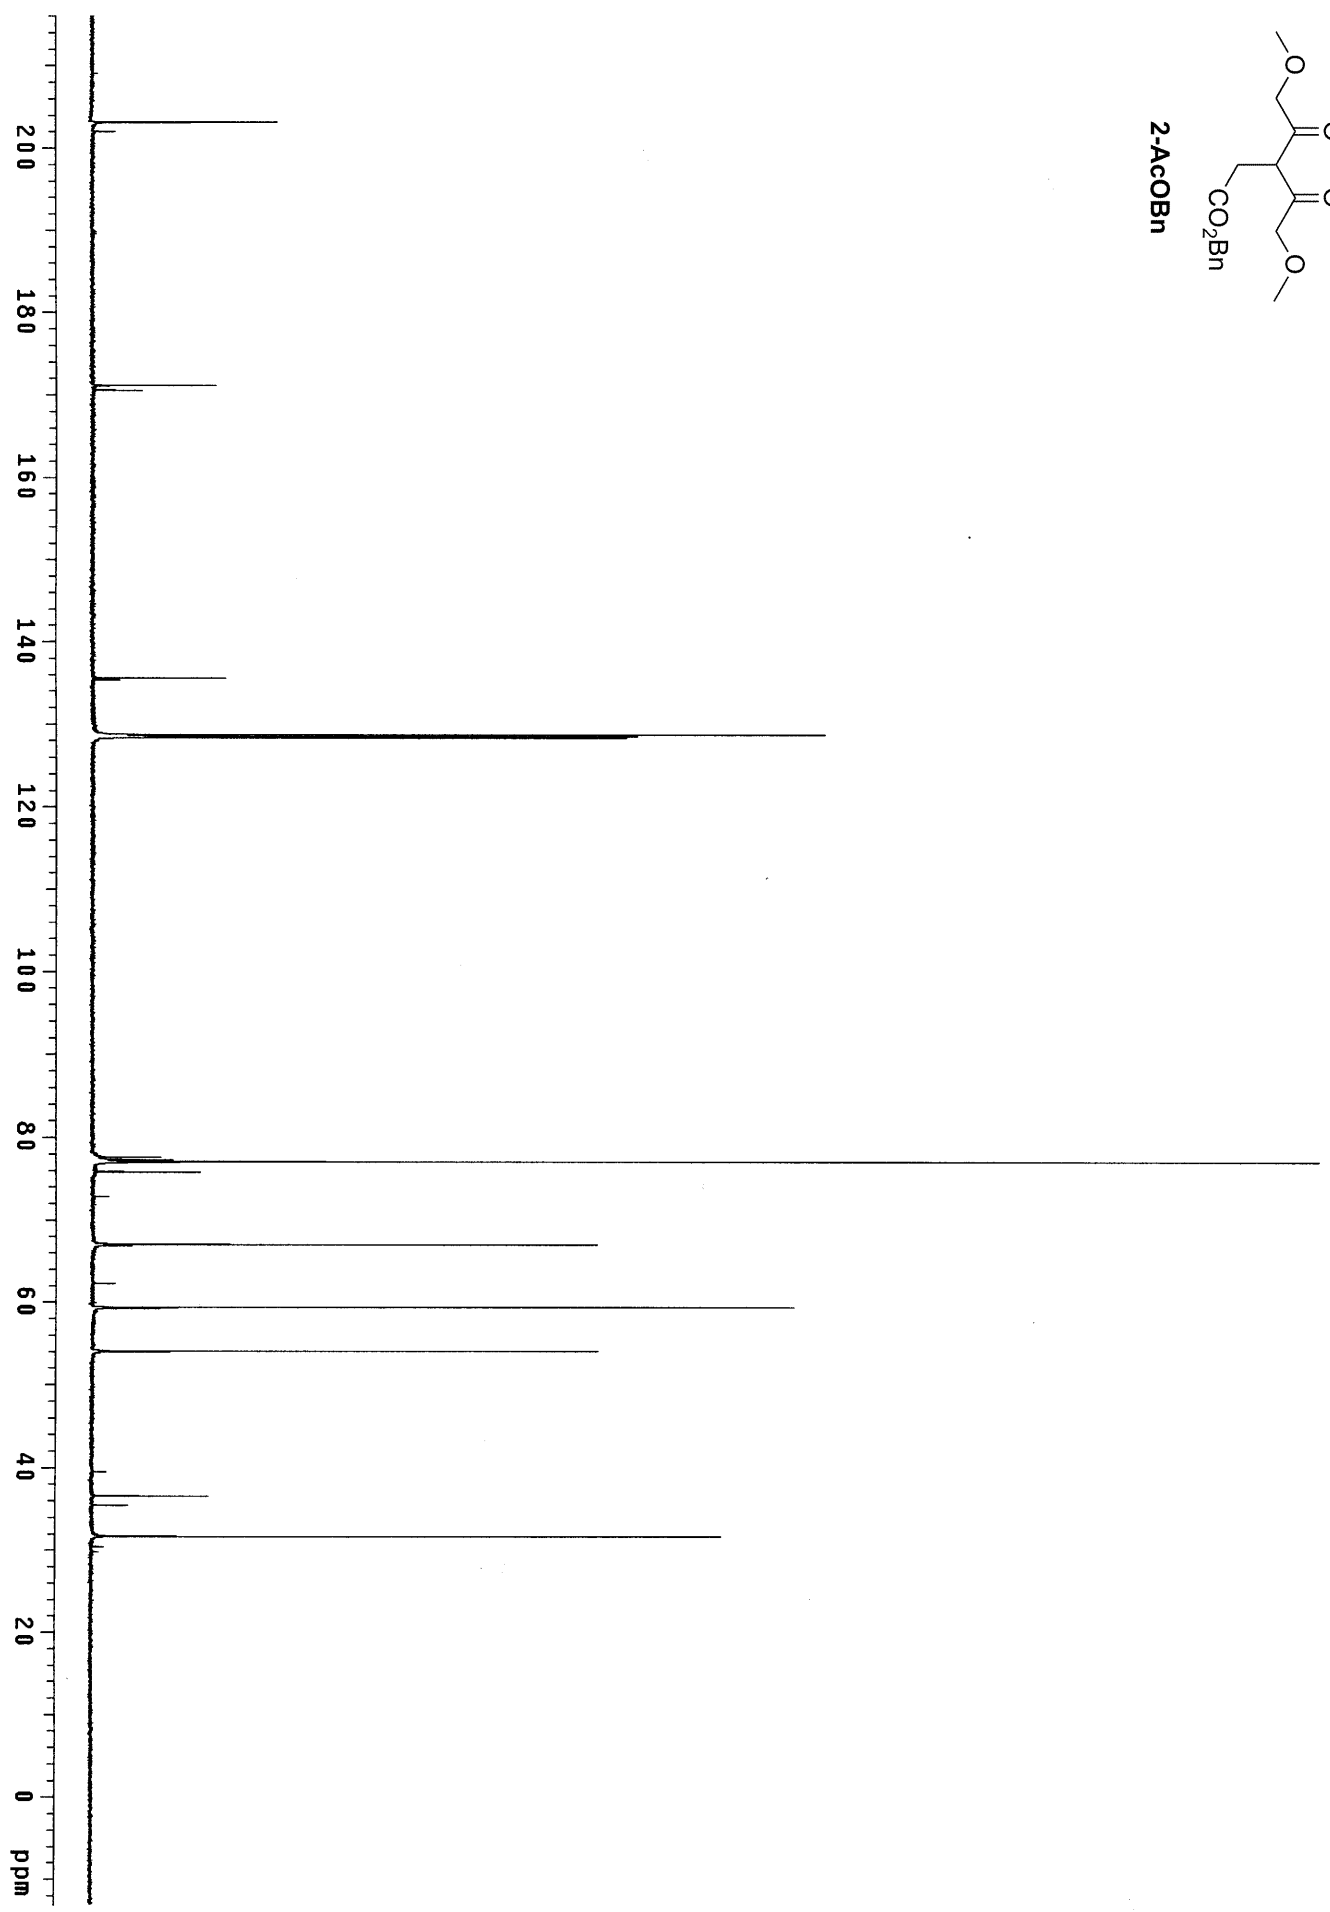

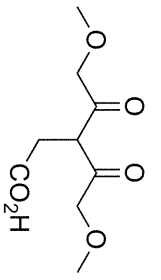

2-AcOH

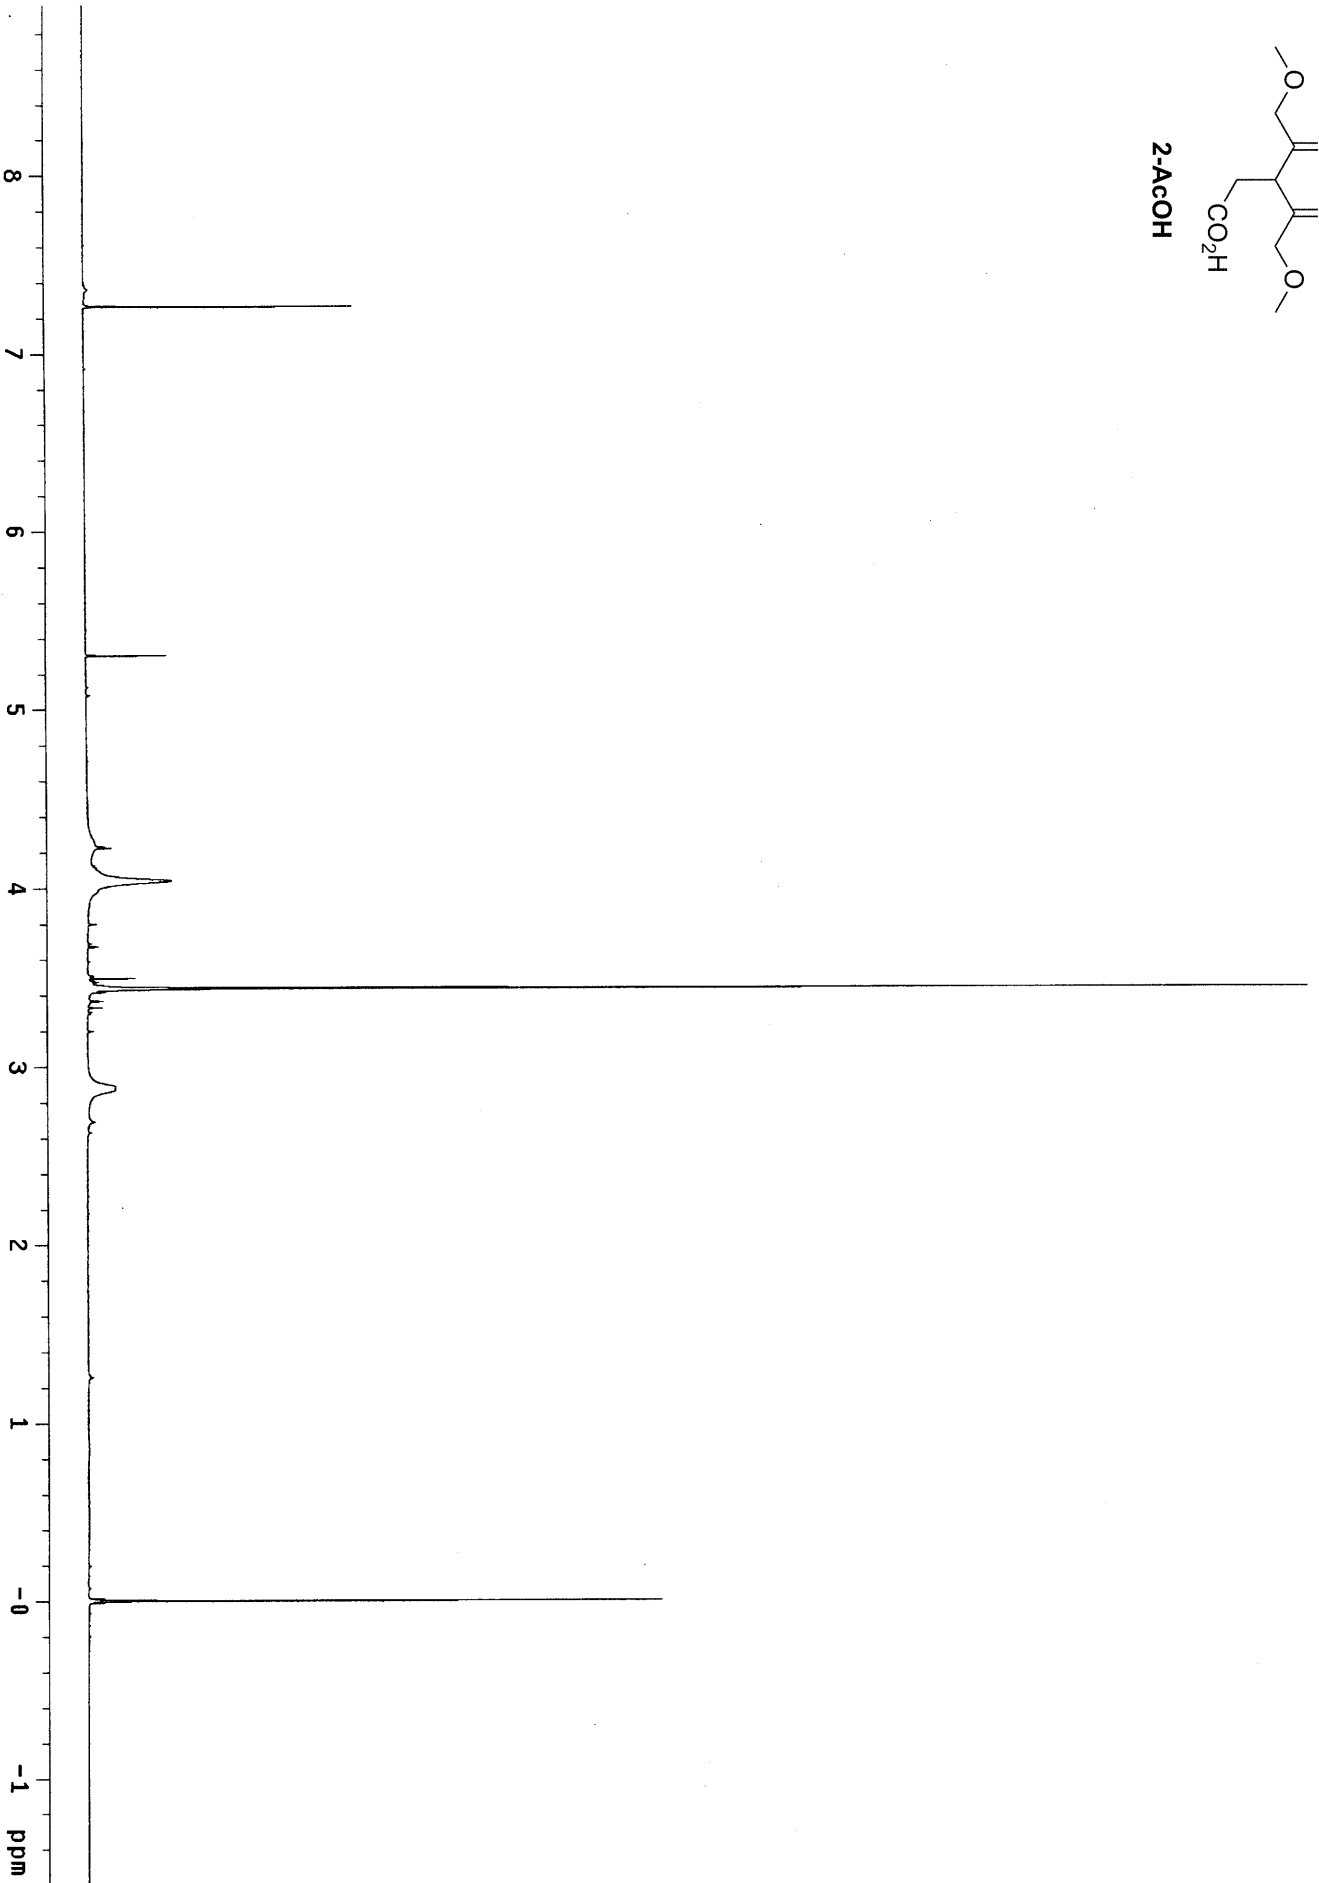



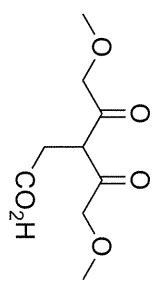

2-AcOH

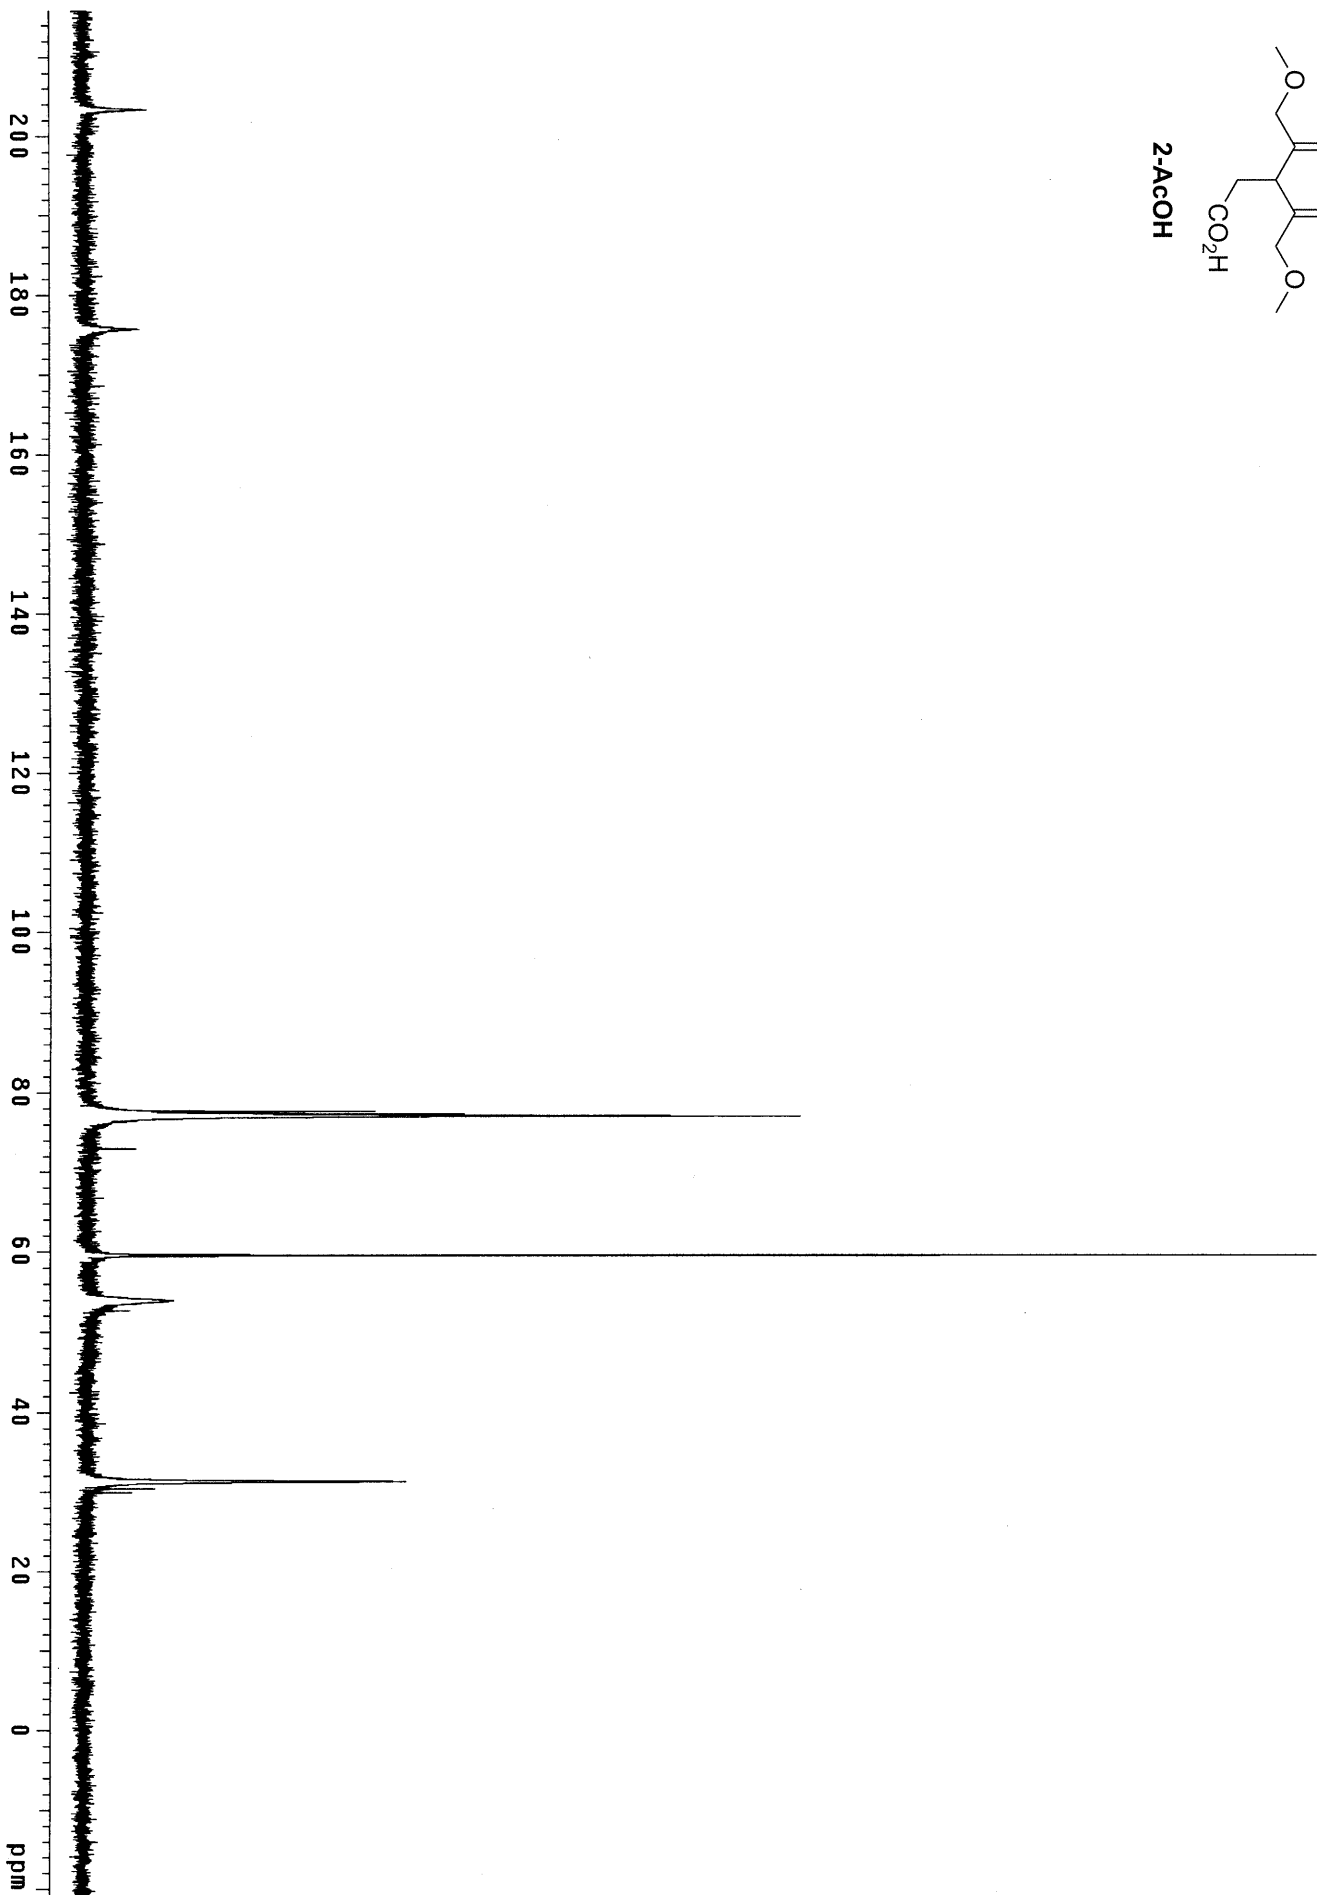

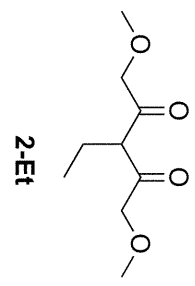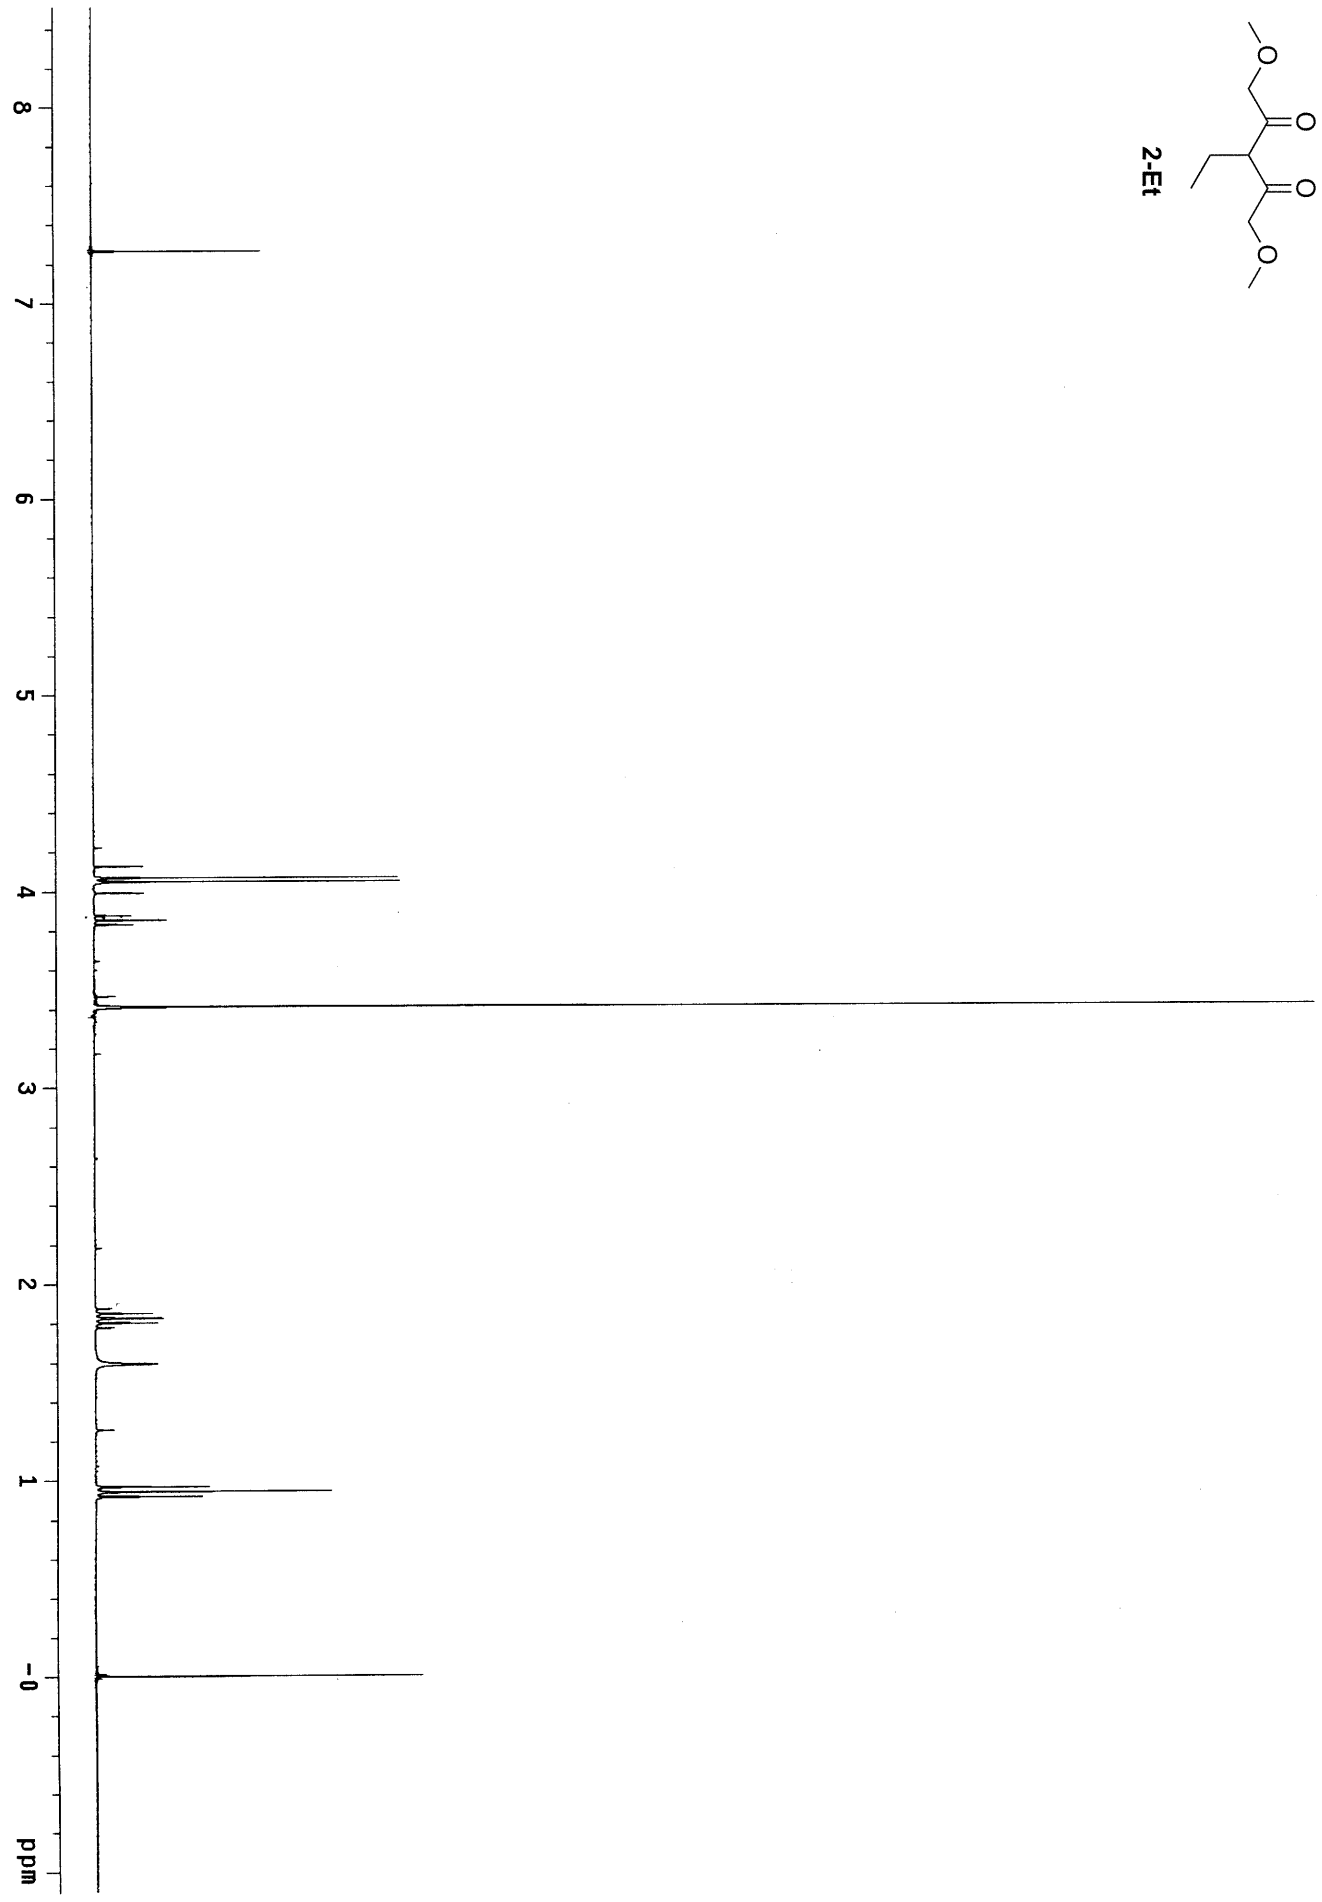

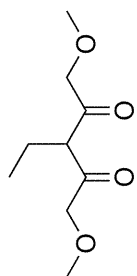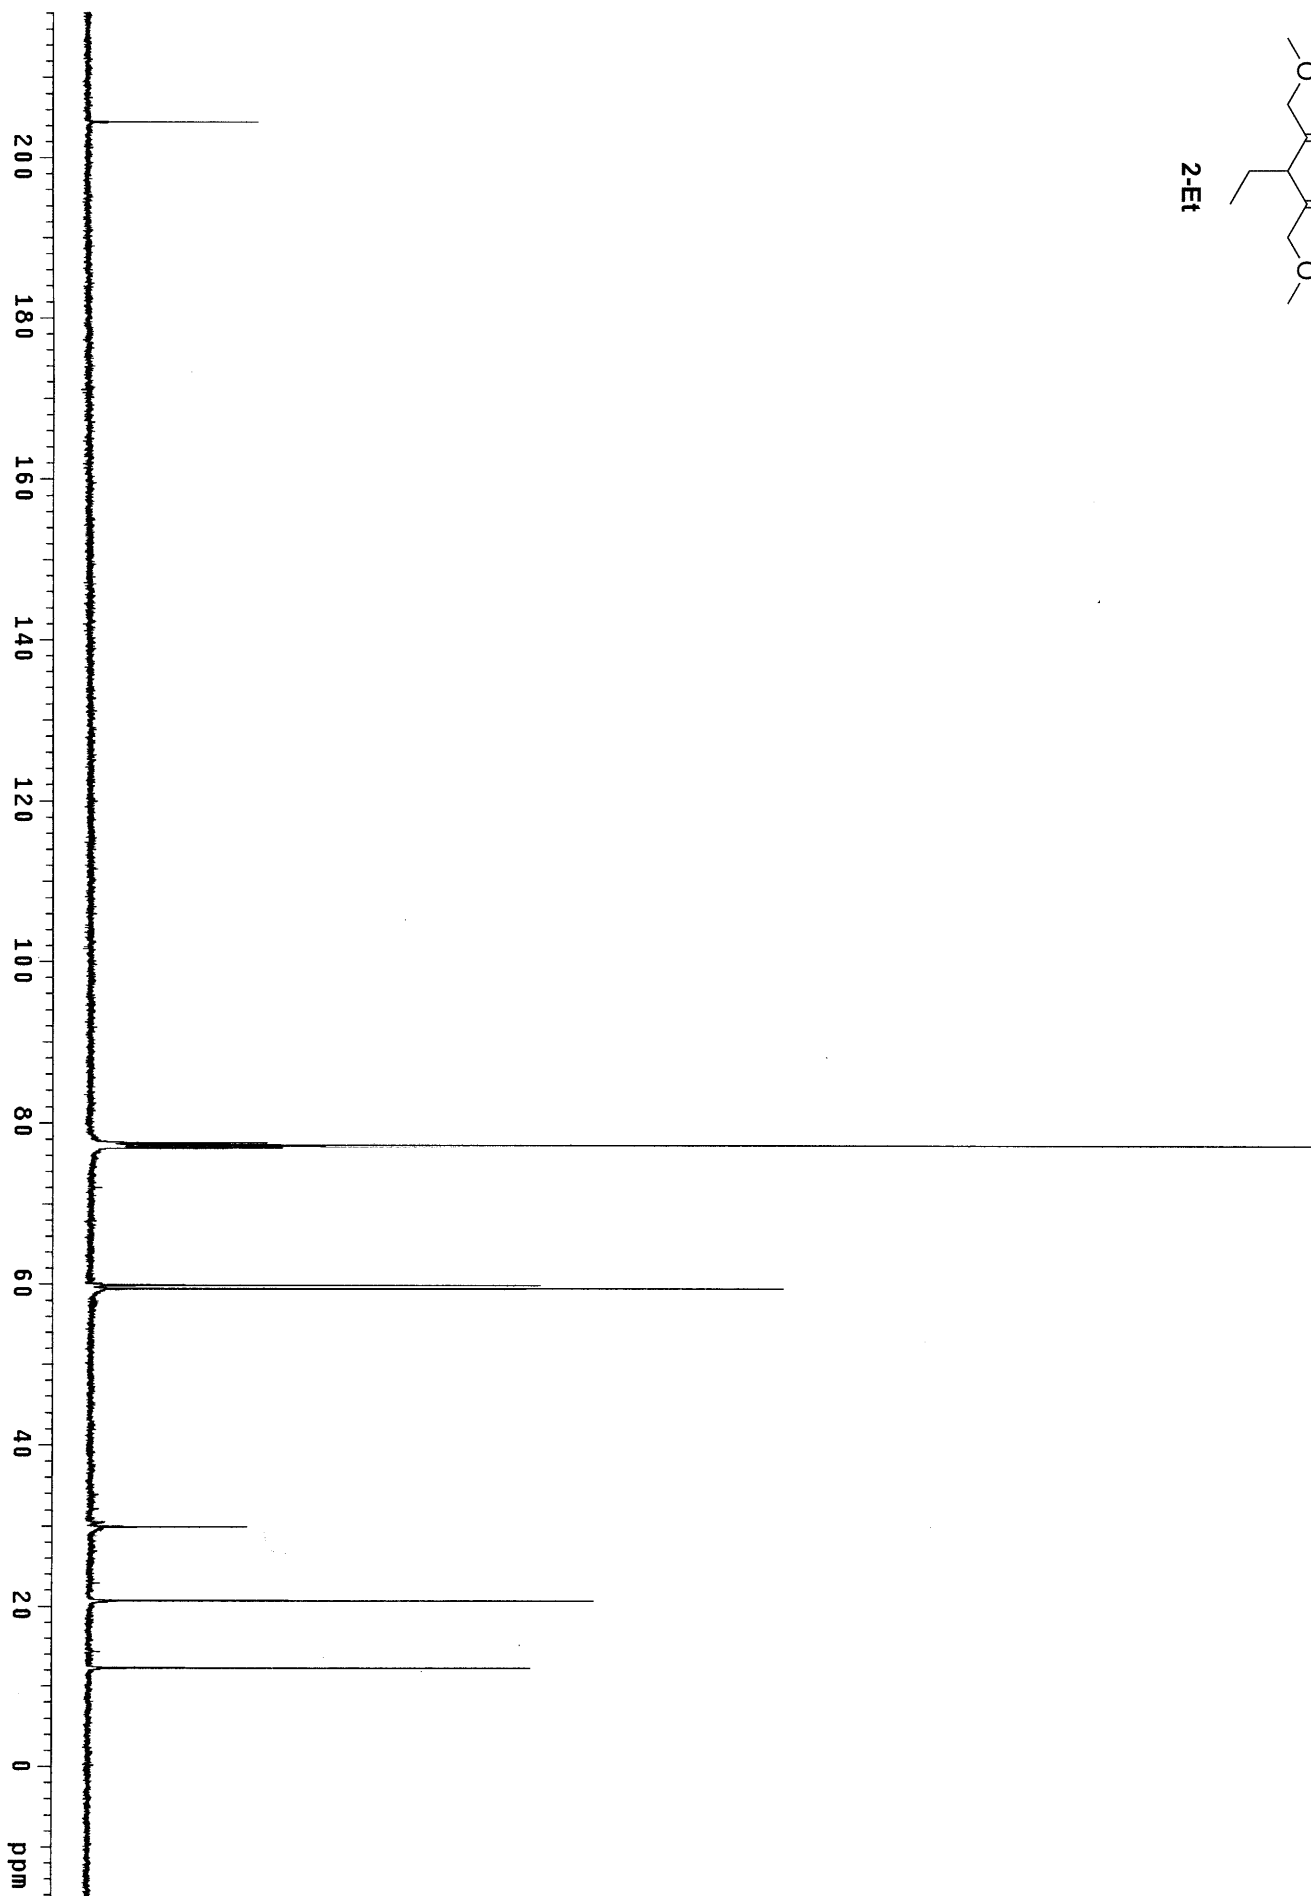

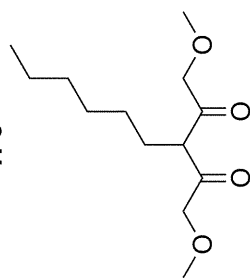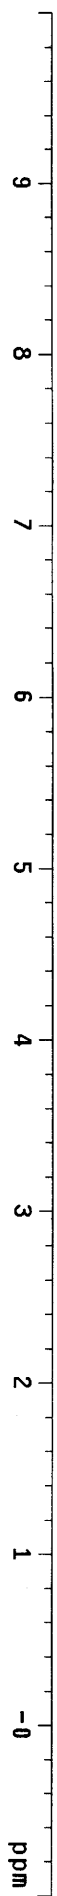

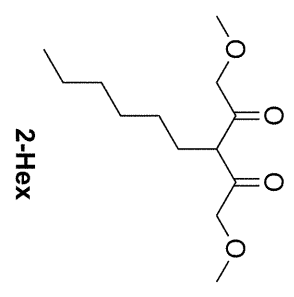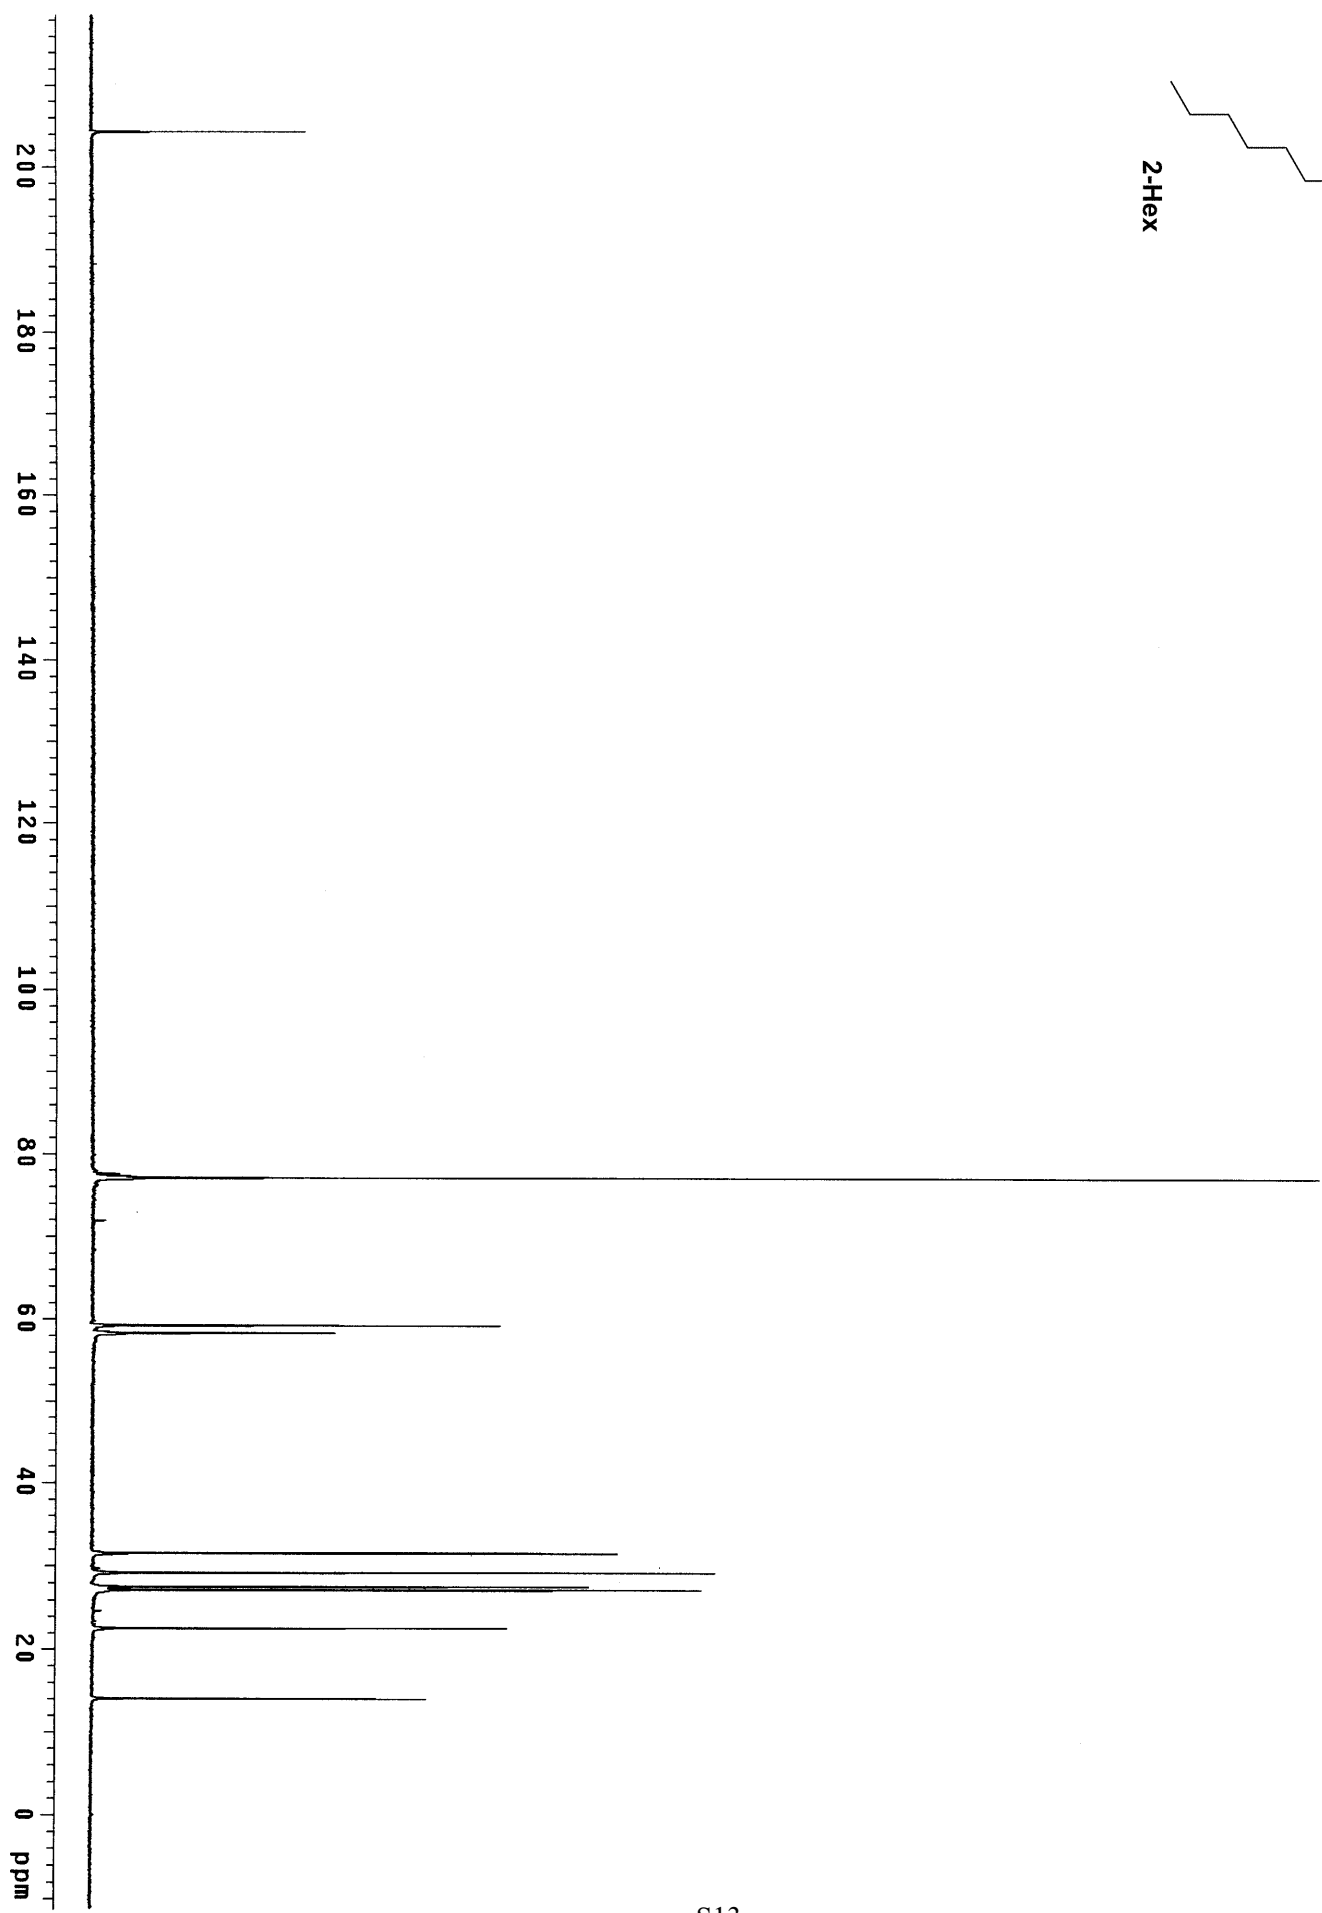

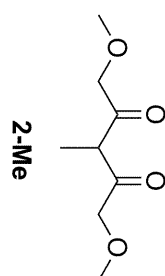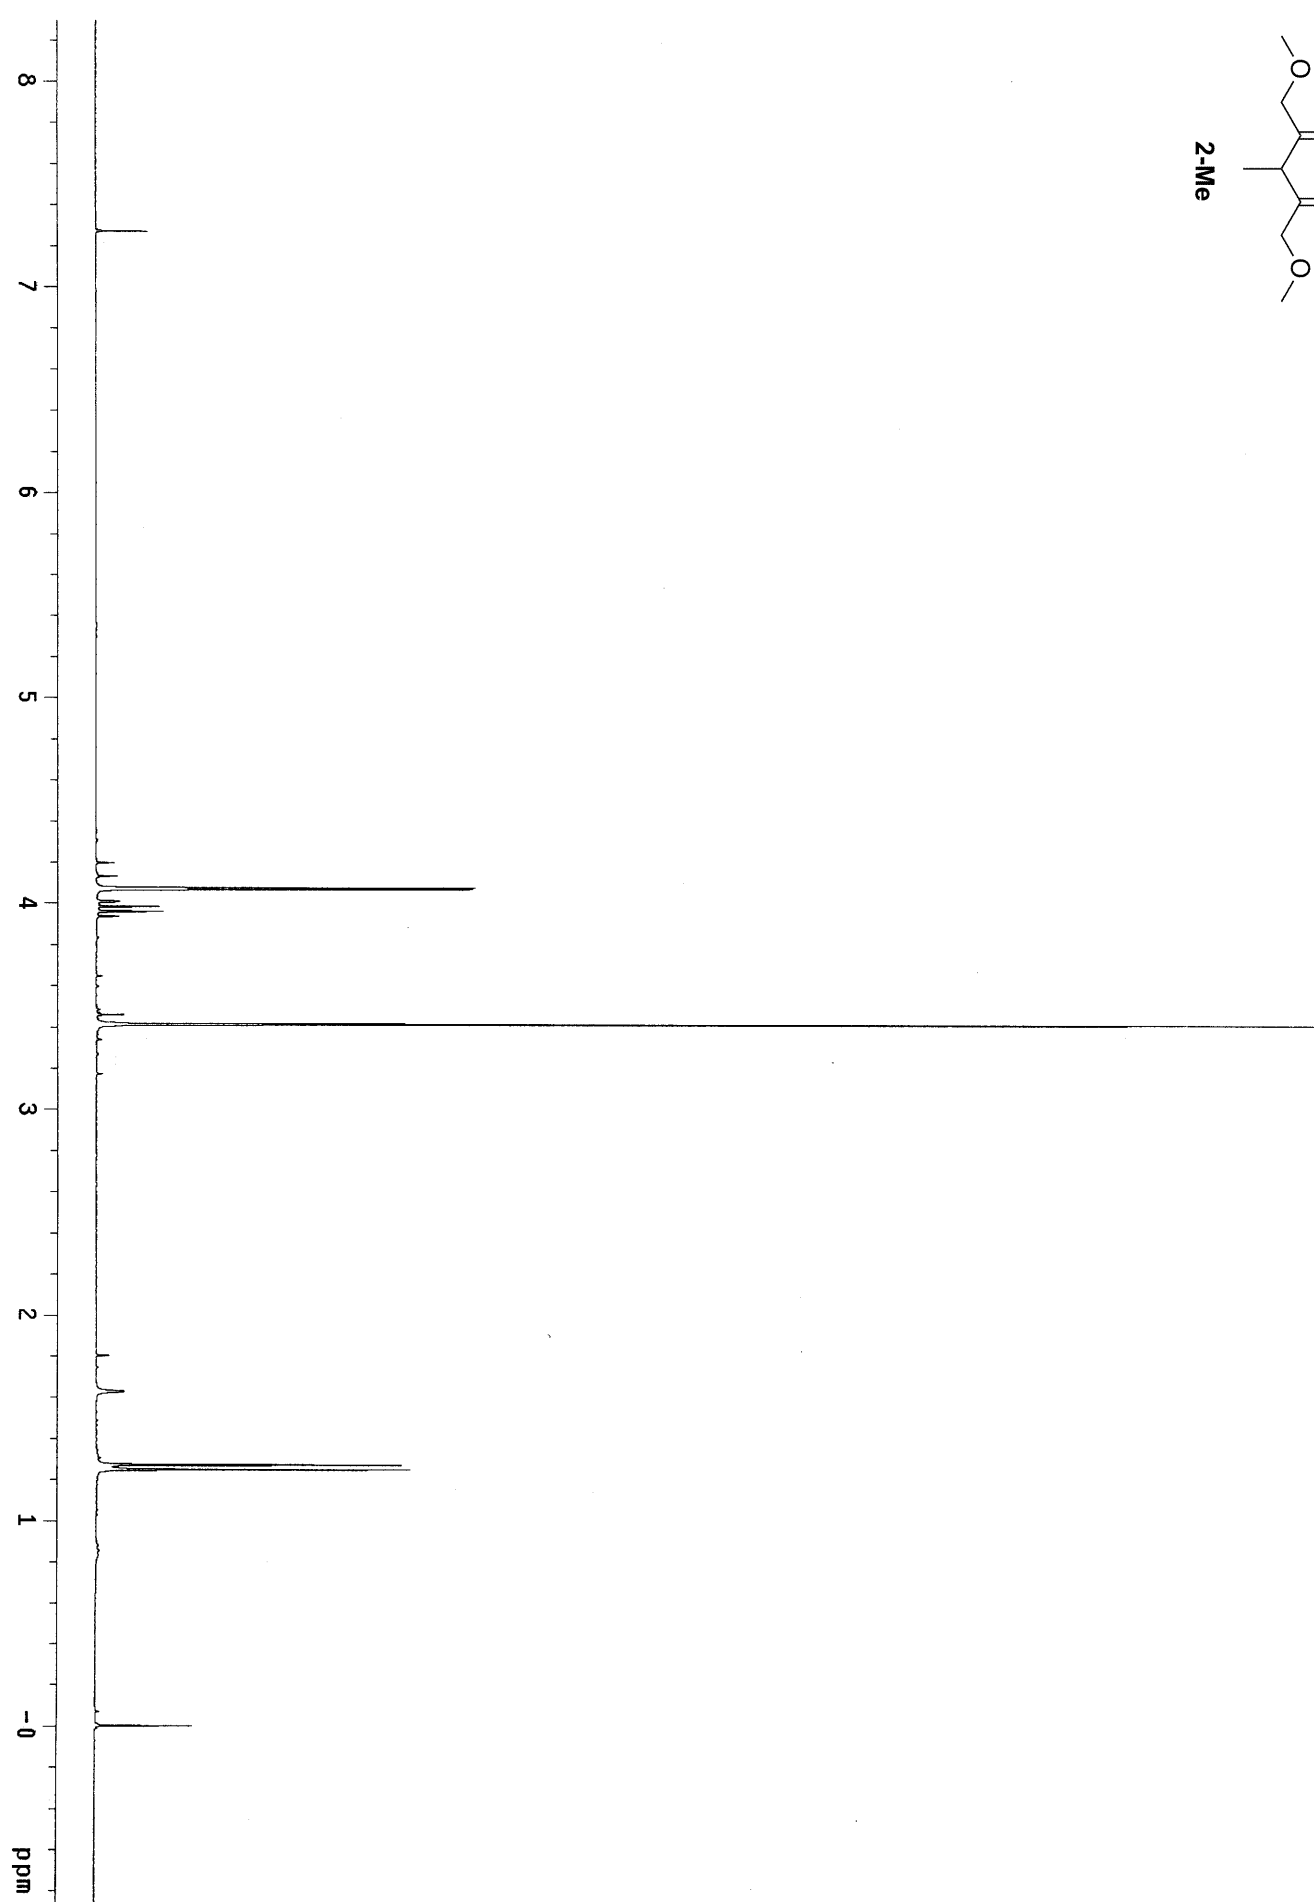

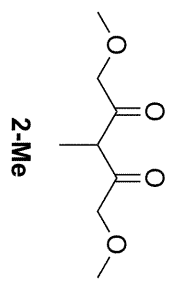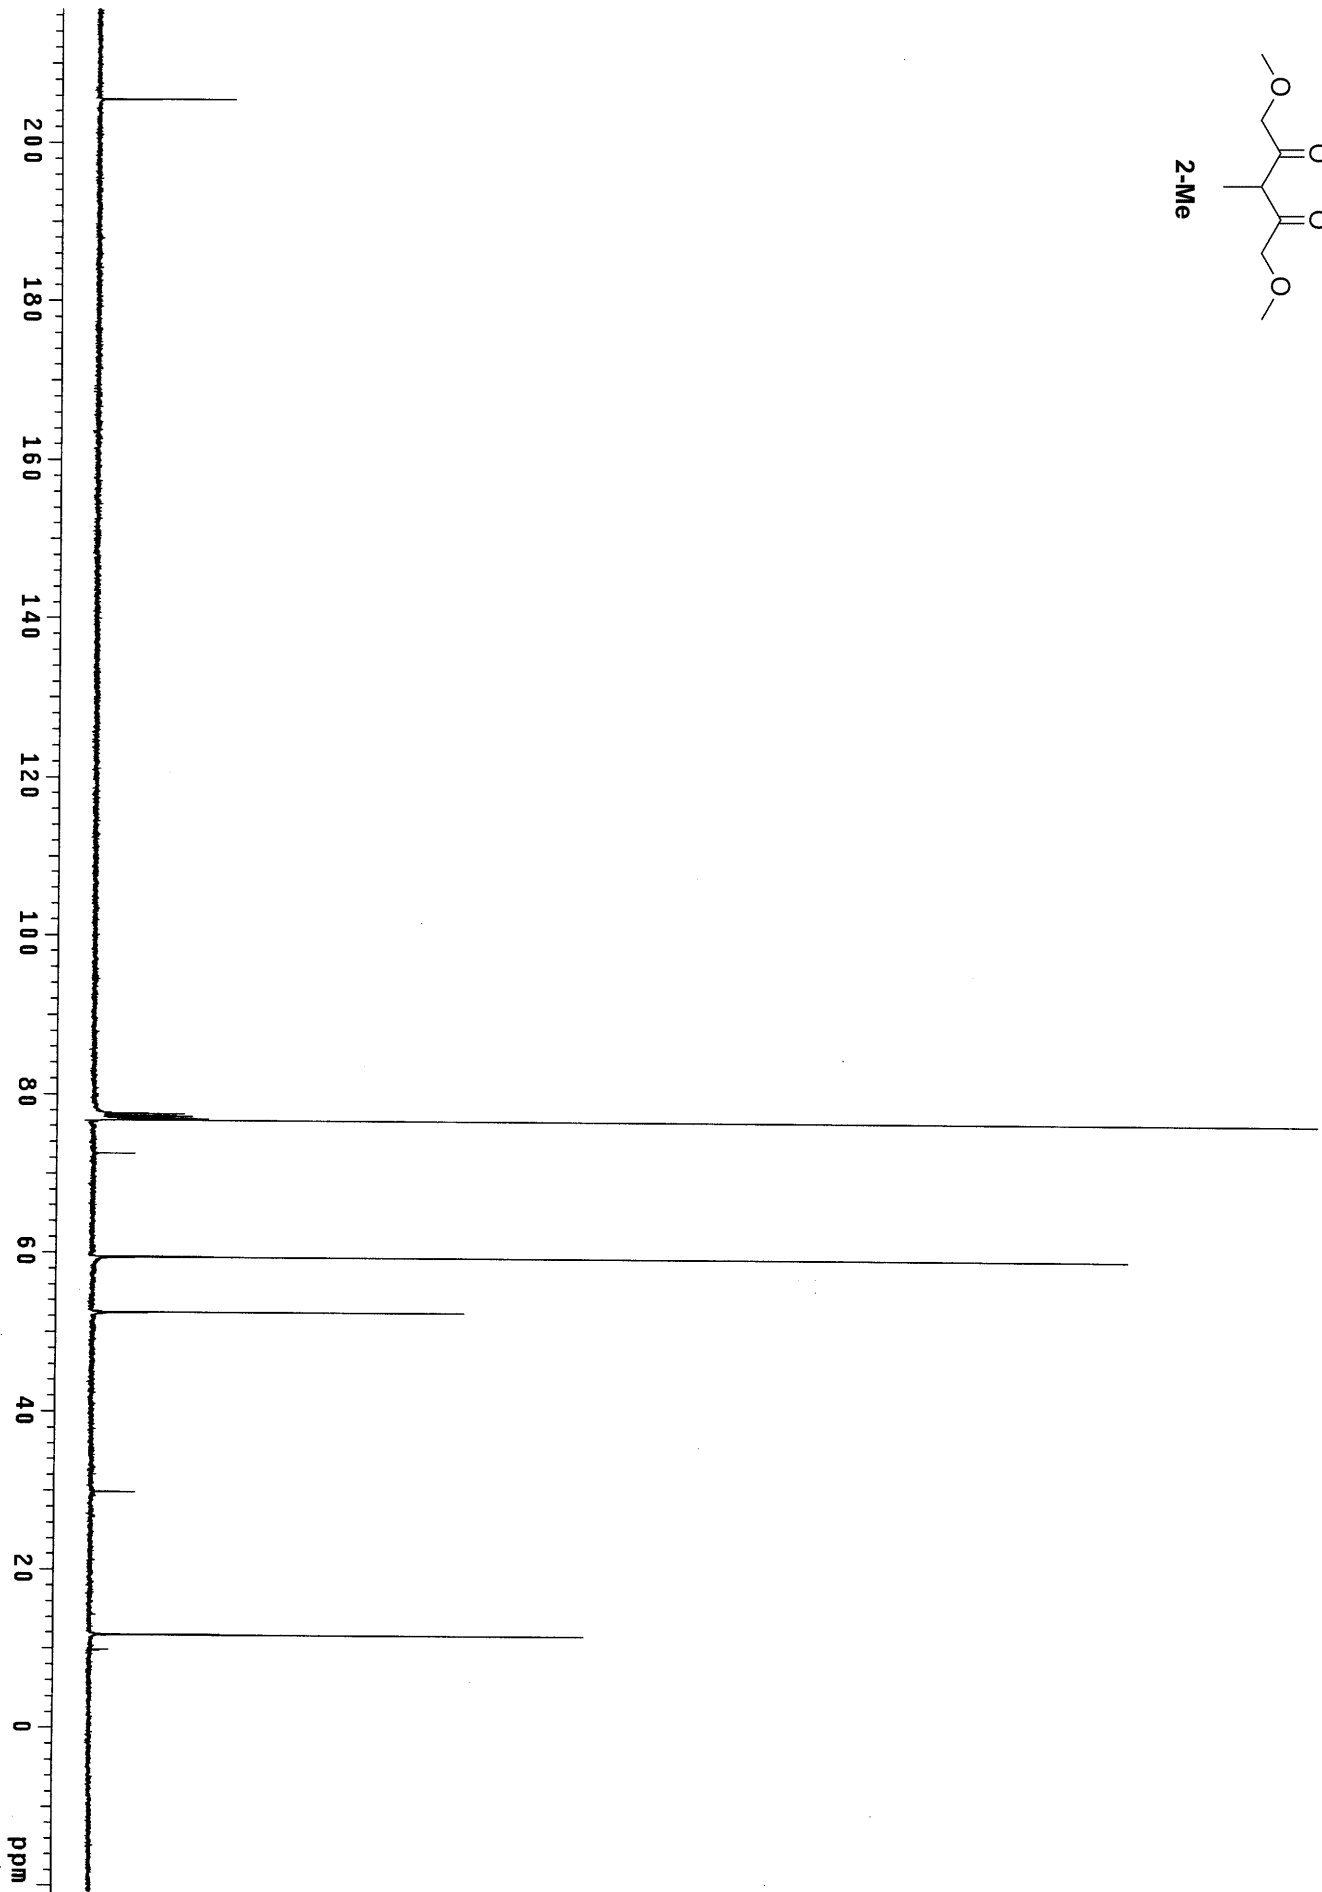

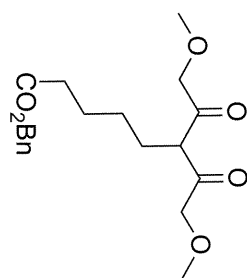

2-PnOBn

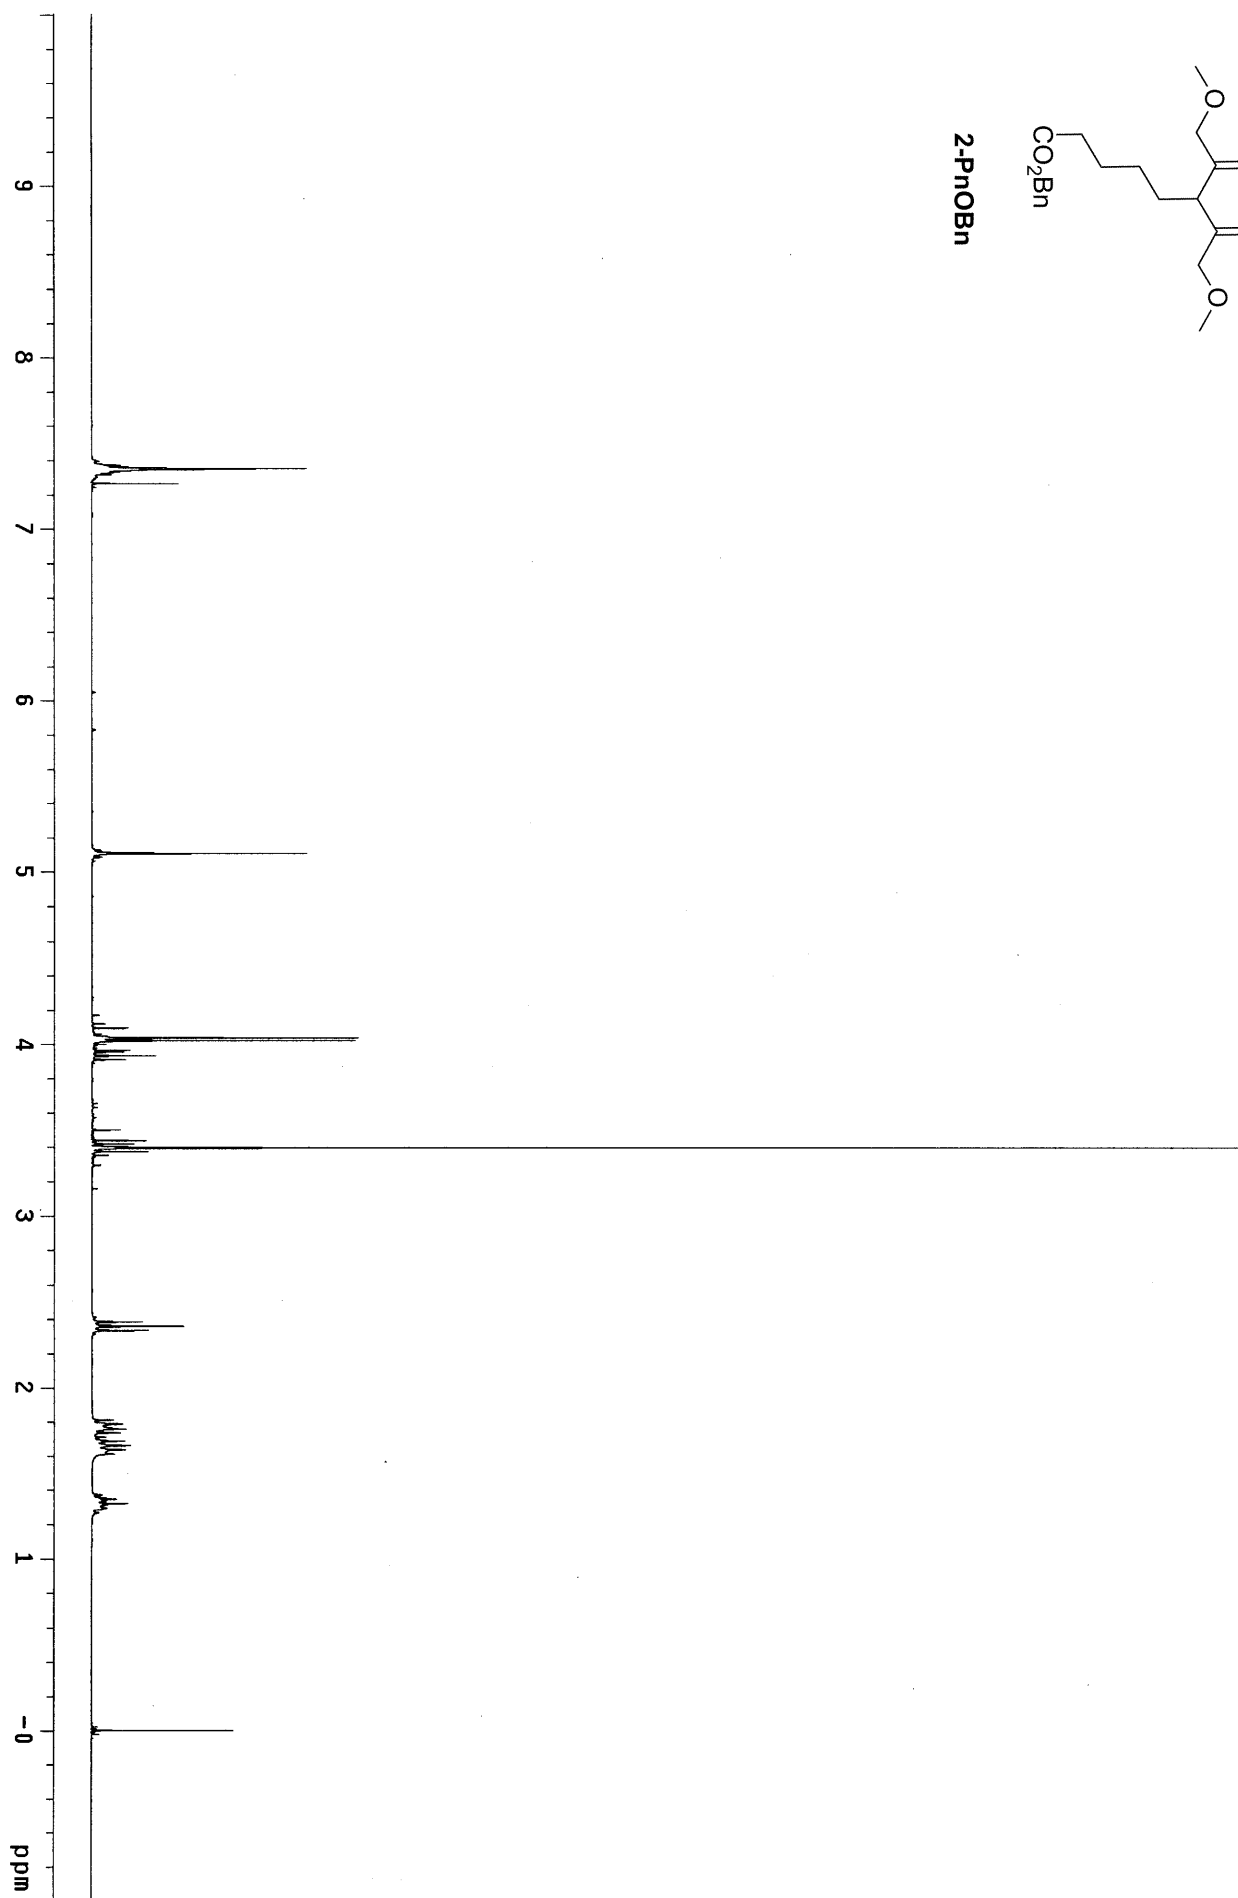



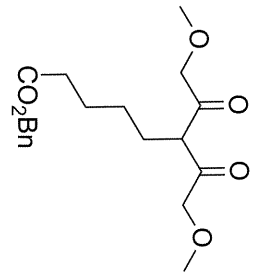

2-PnOBn

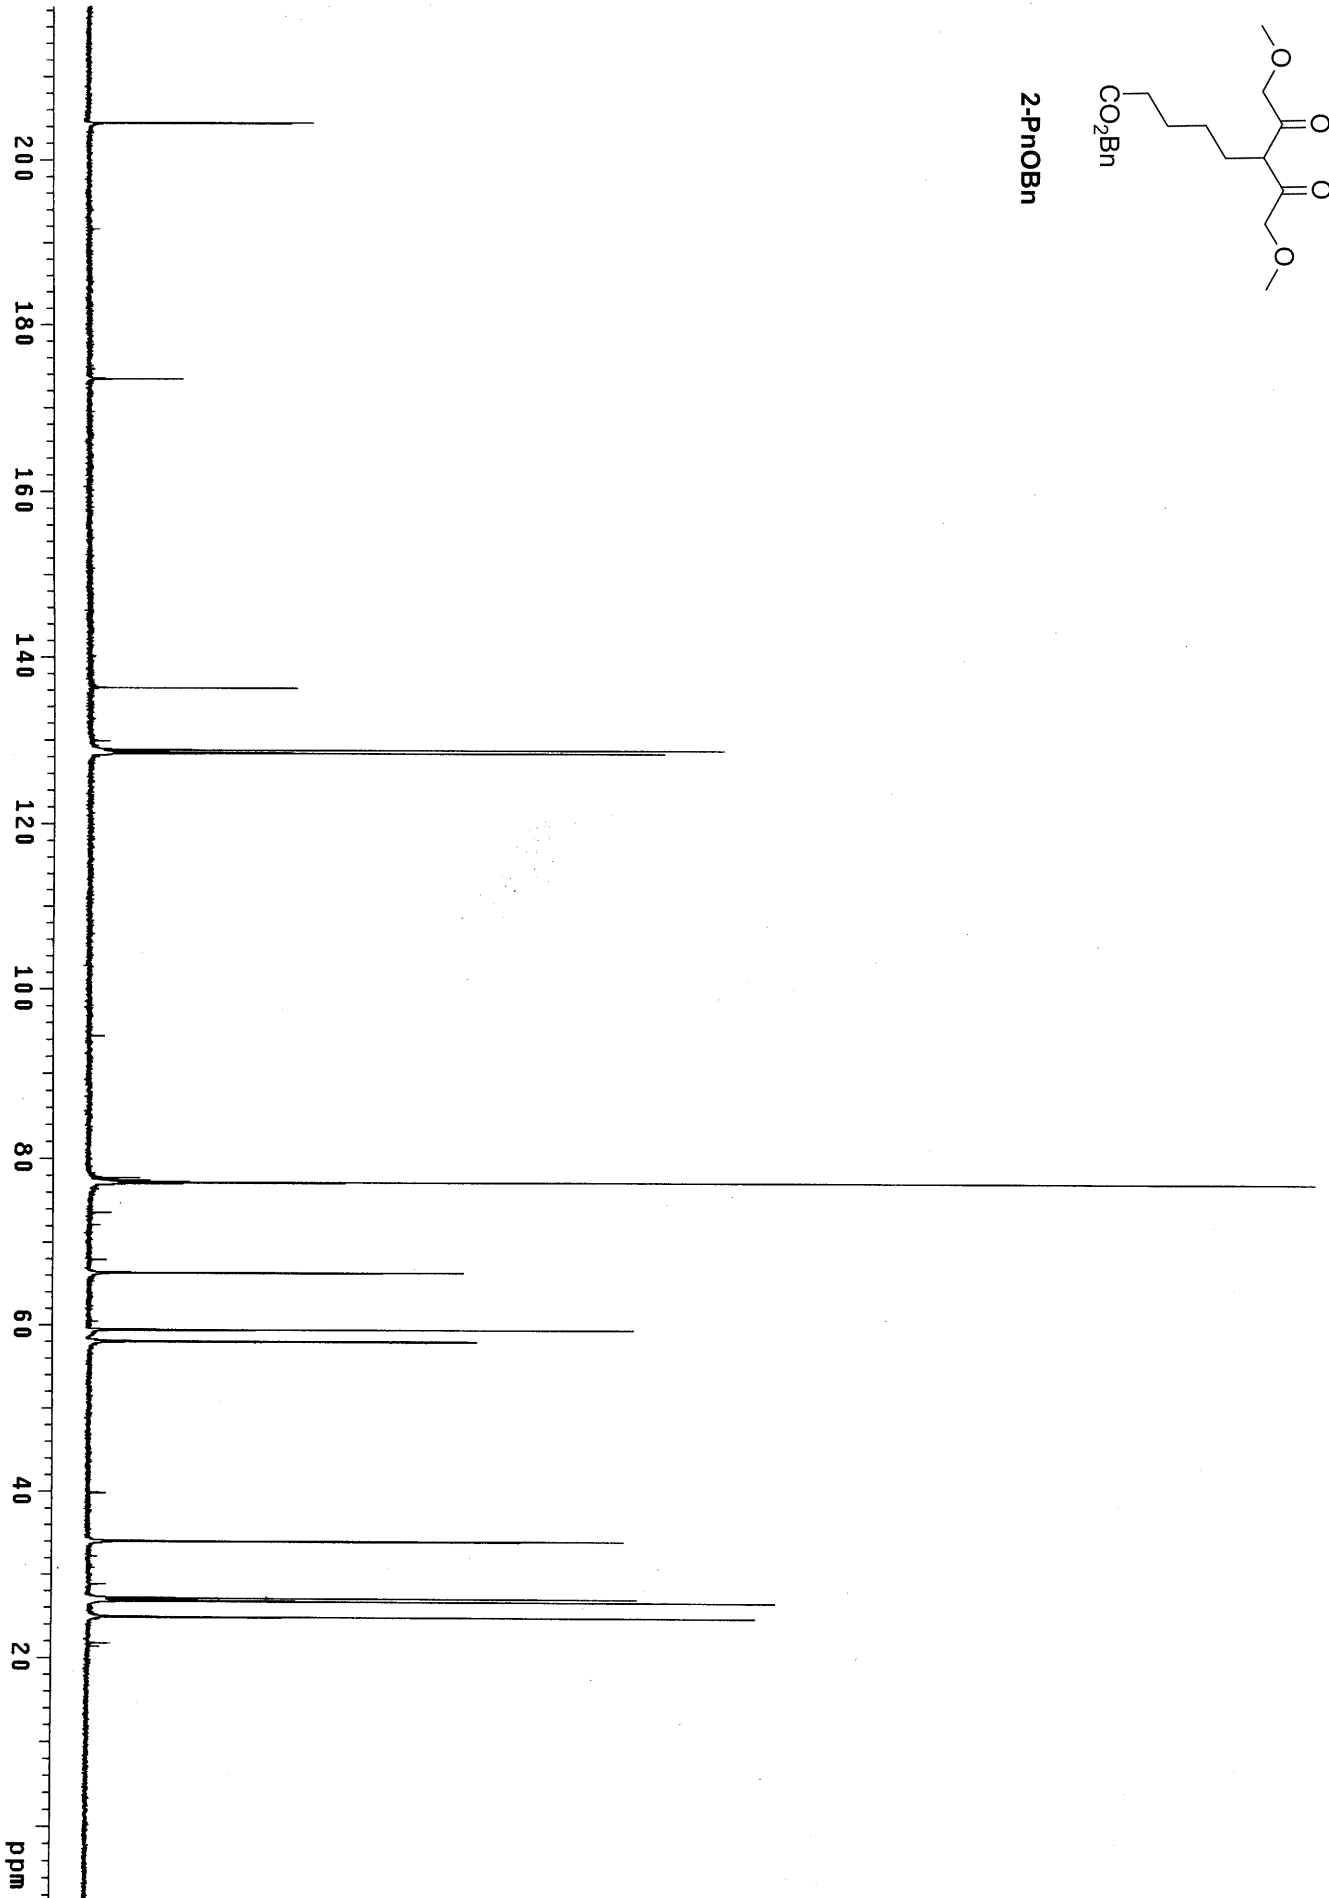

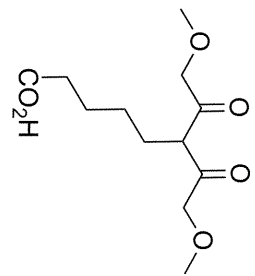

2-PnOH

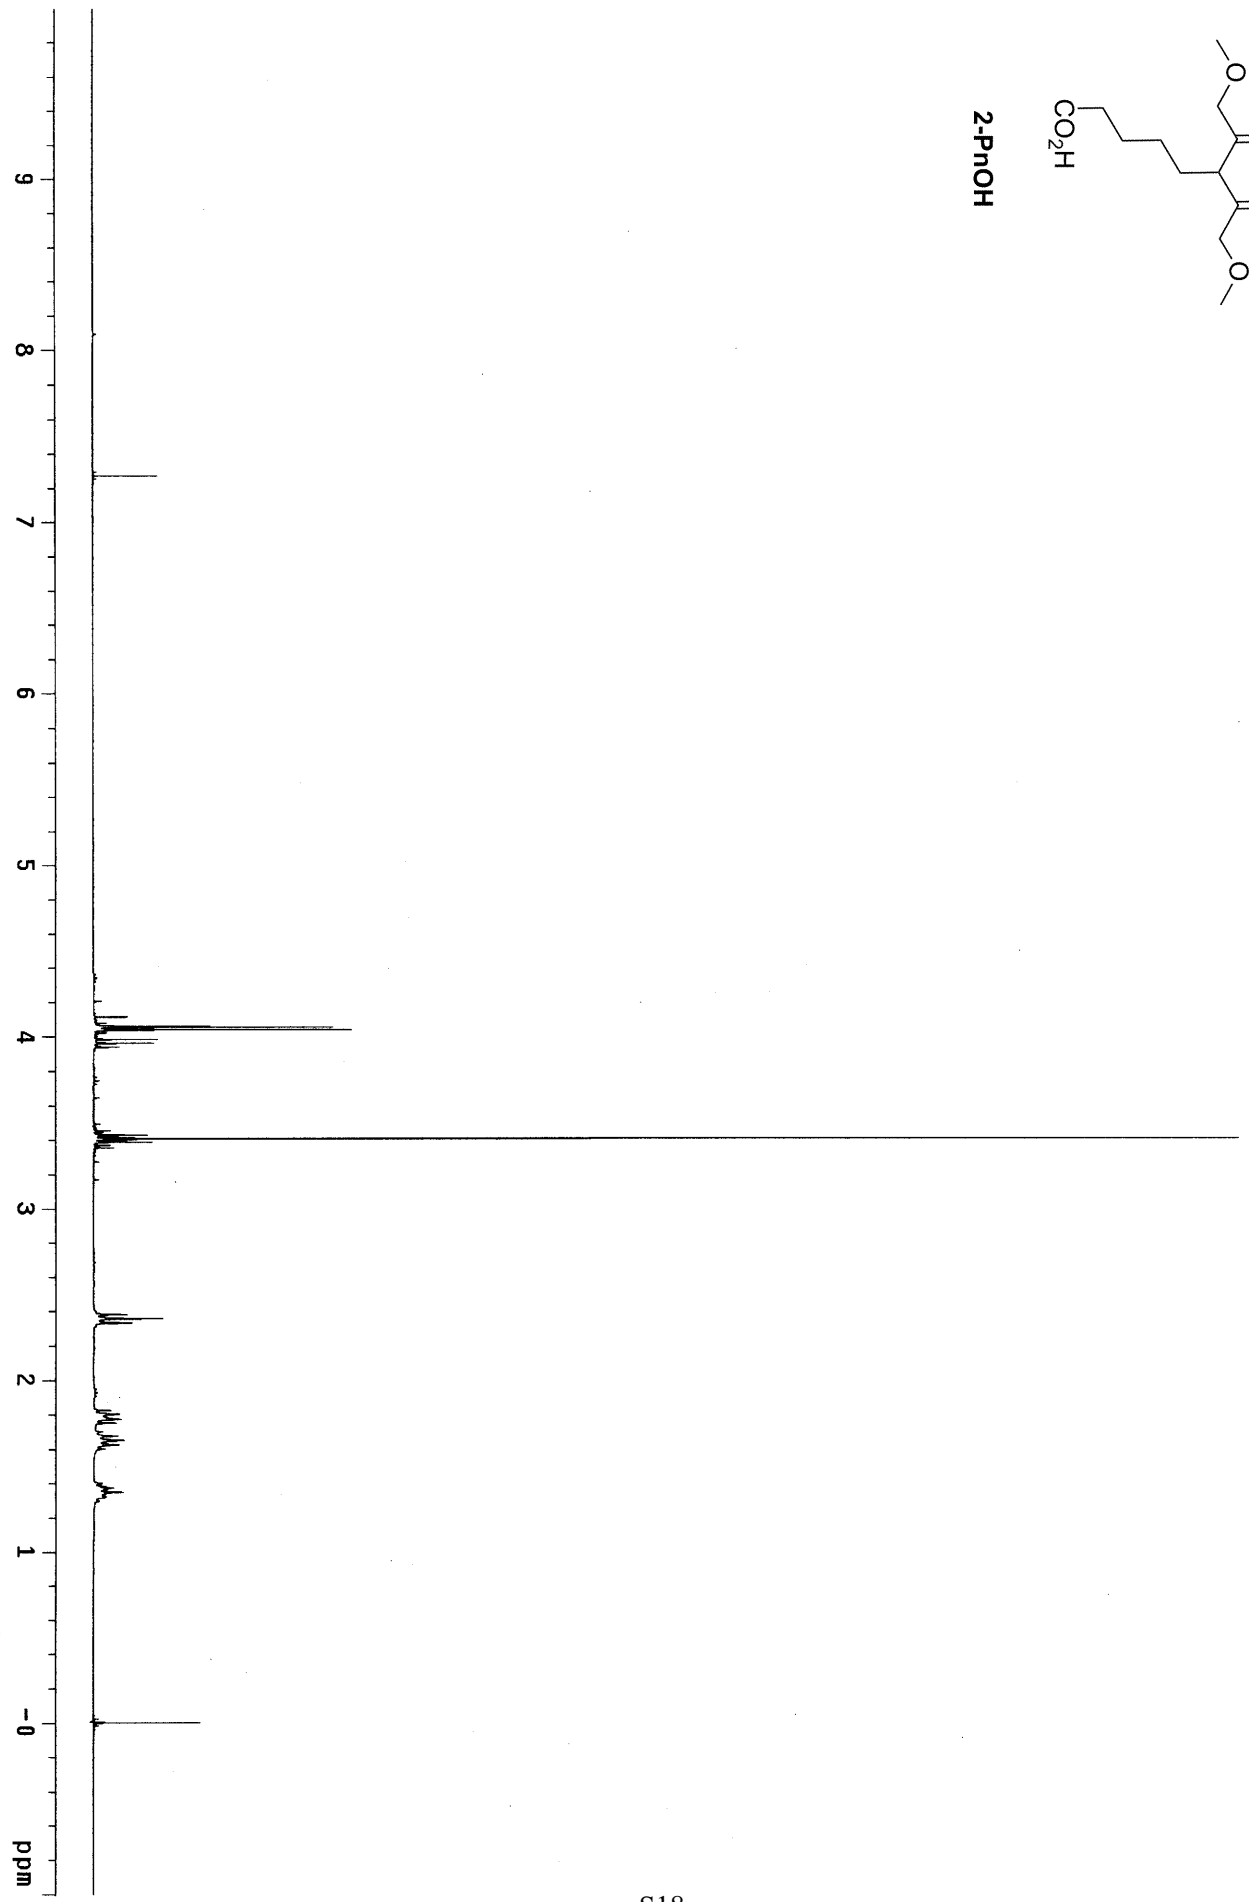

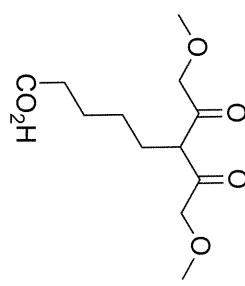

2-PnOH

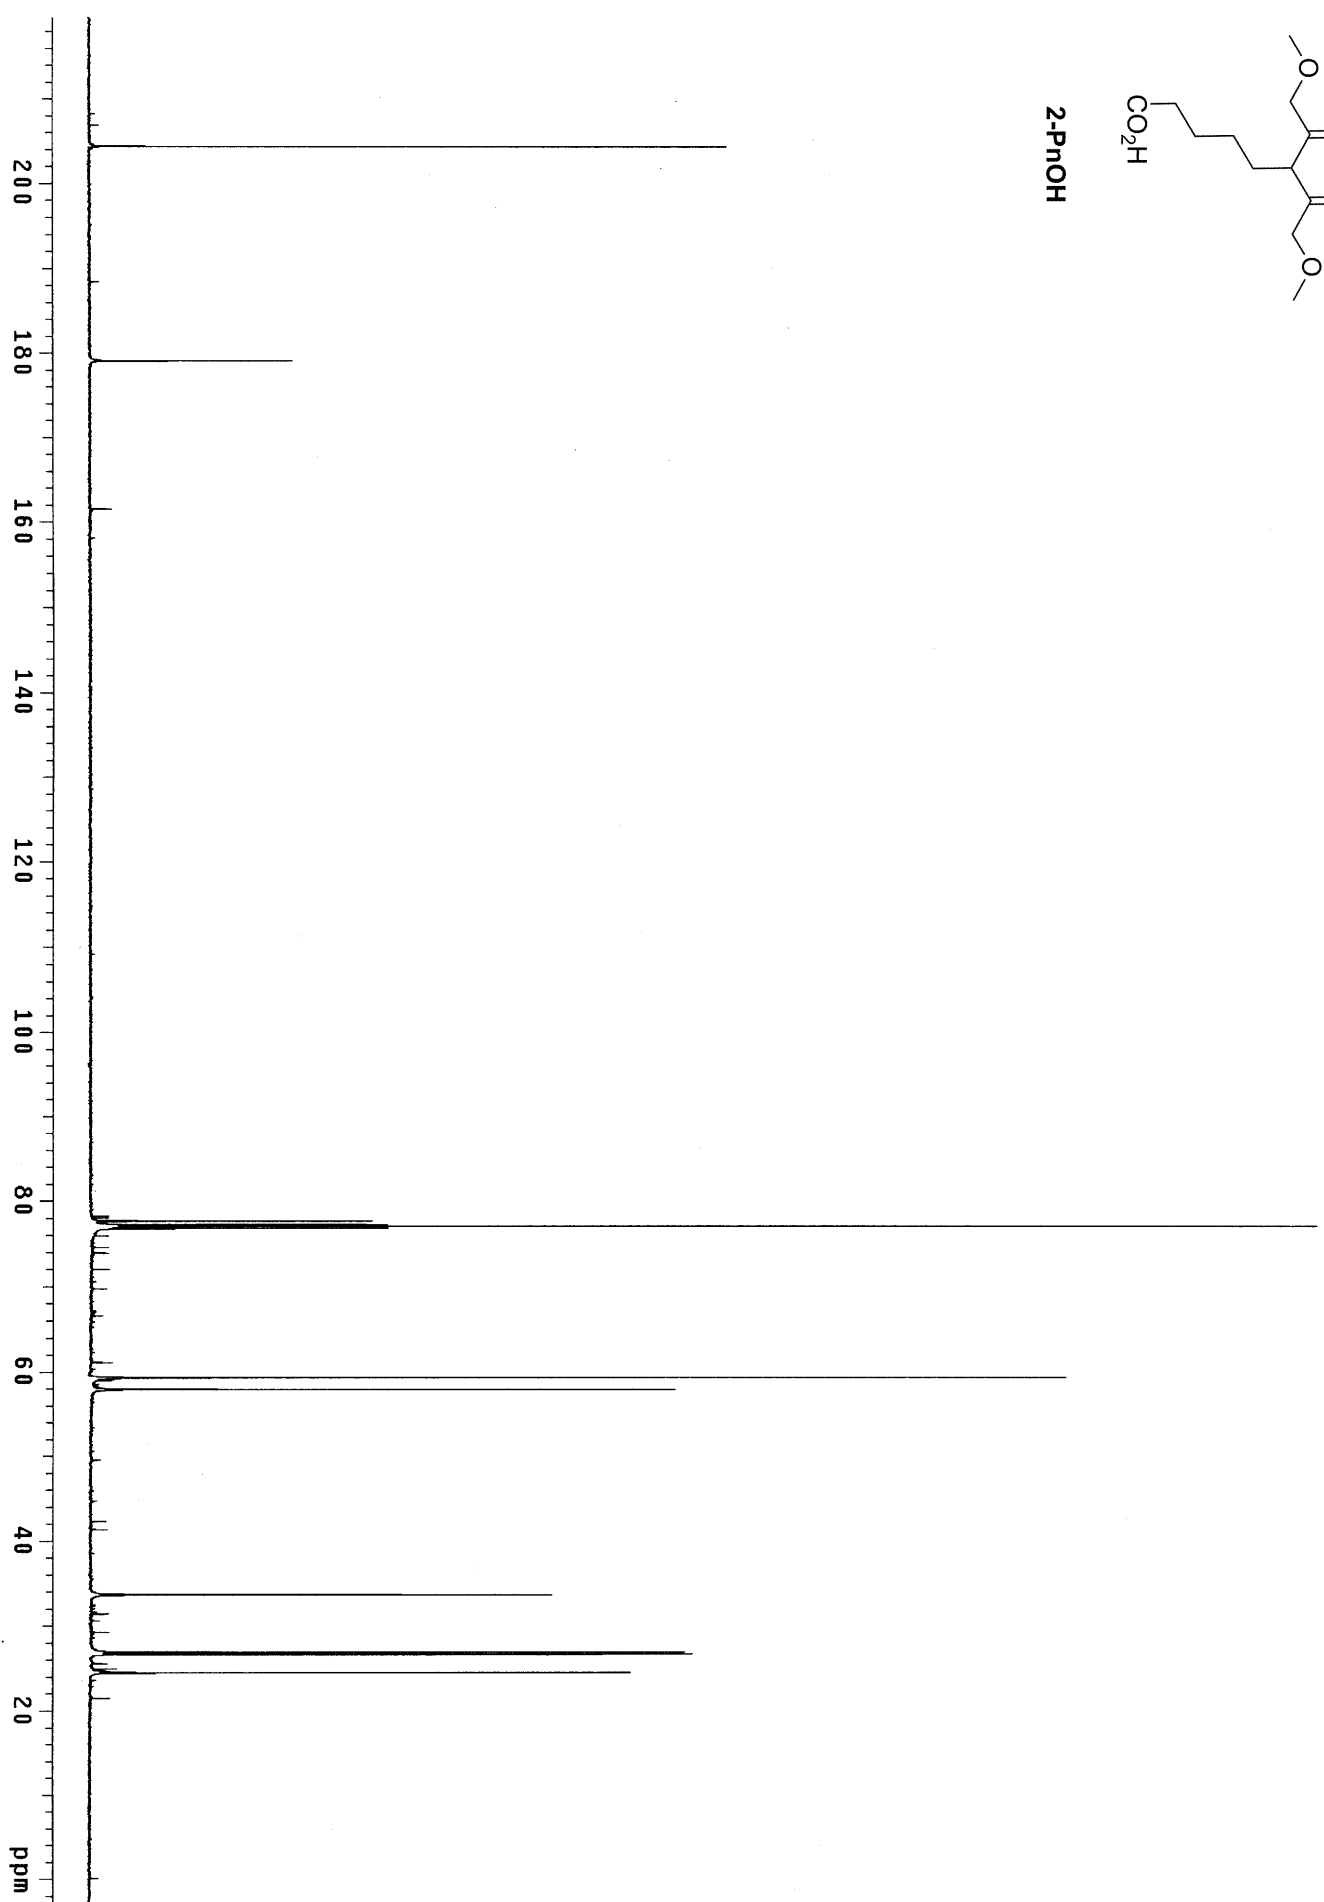

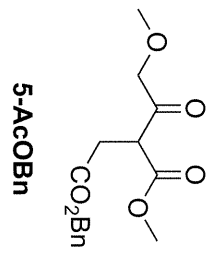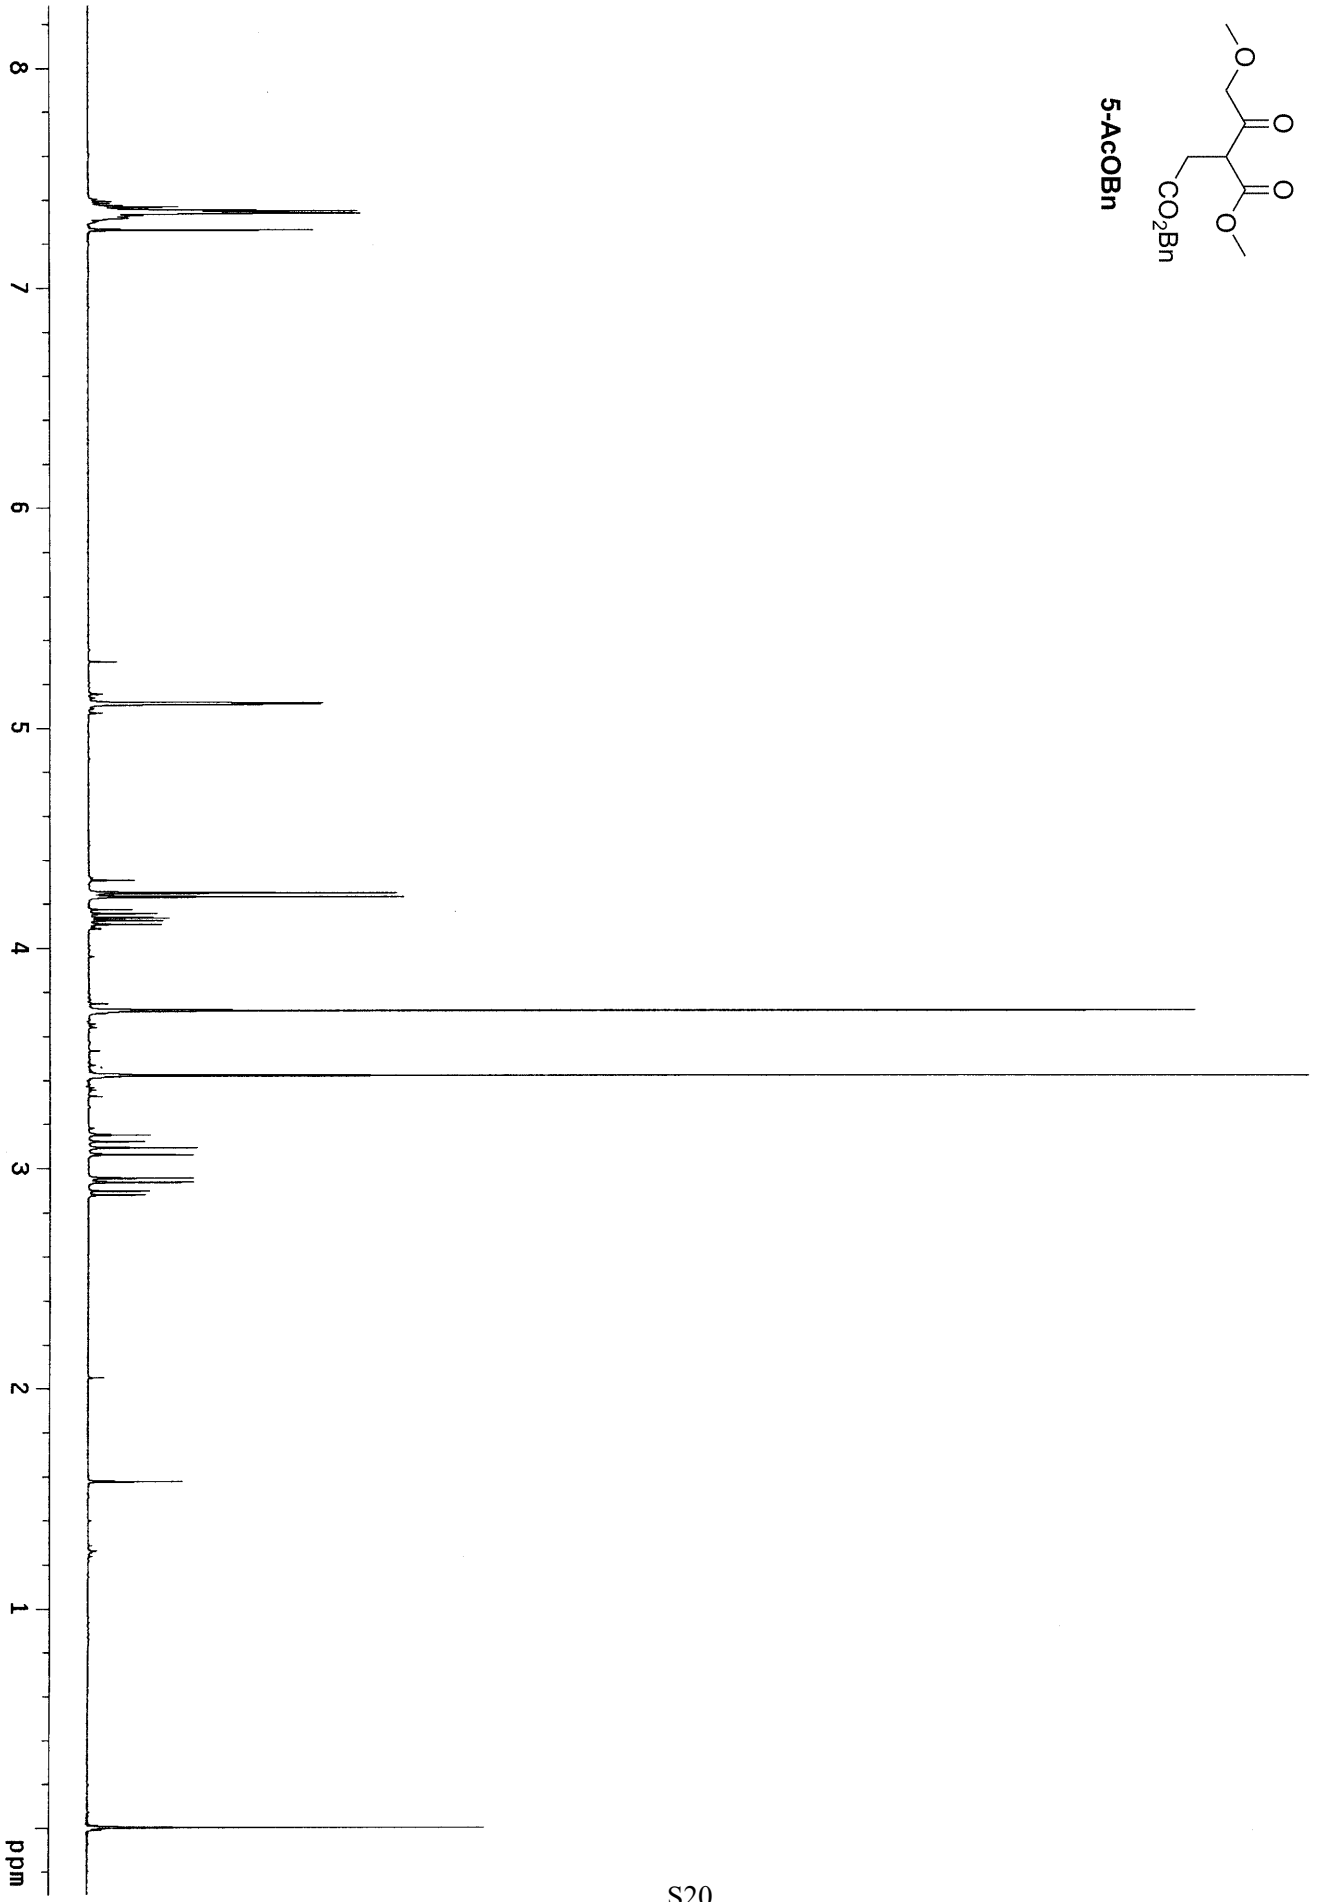

5-AcOBn

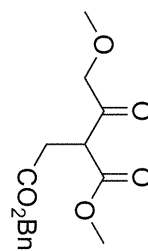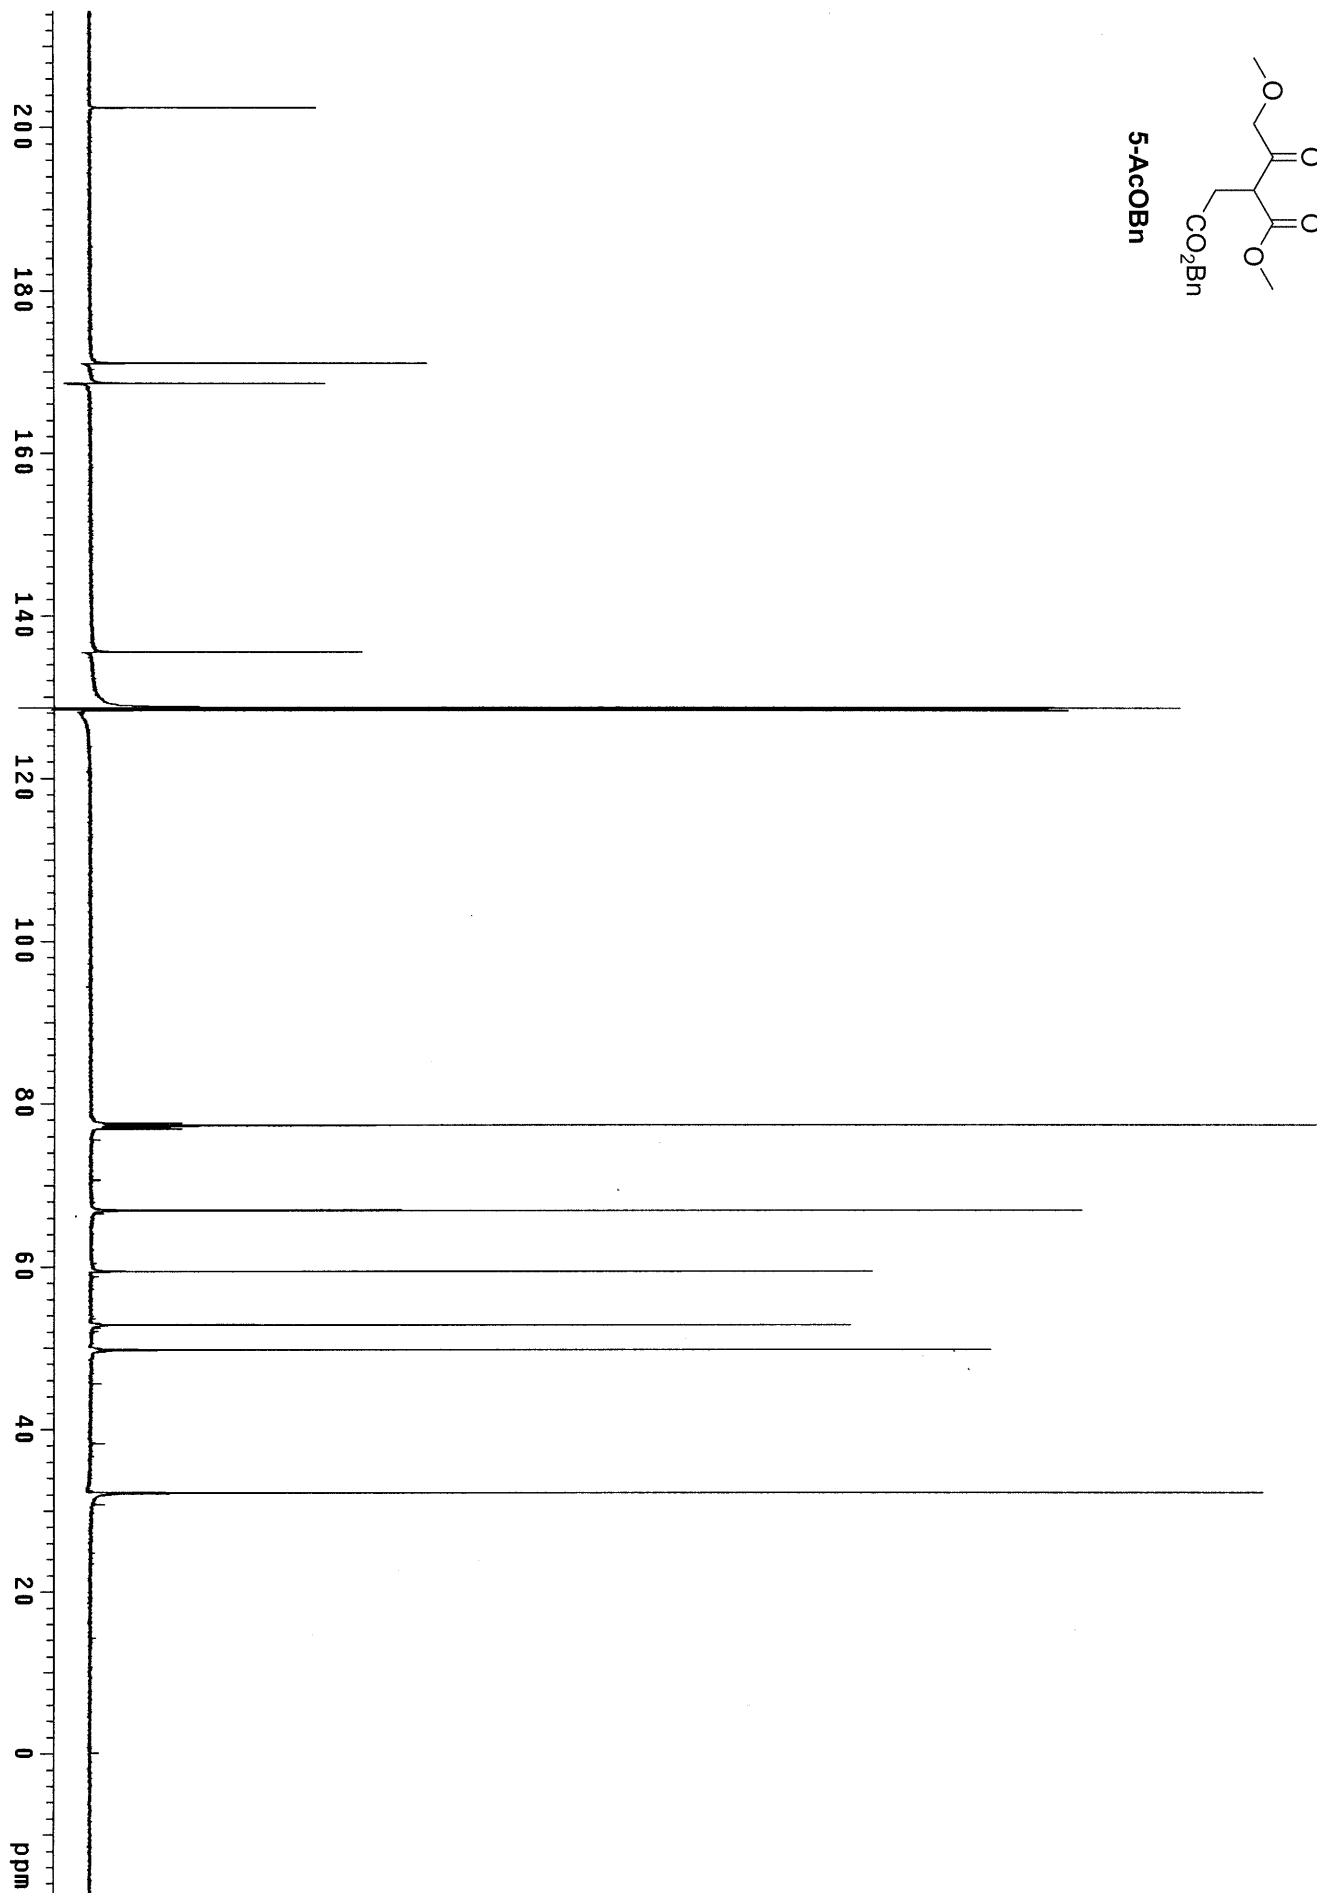

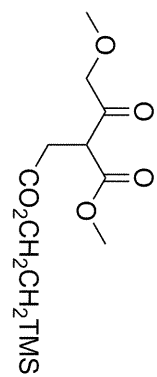

5-AcOEtTMS

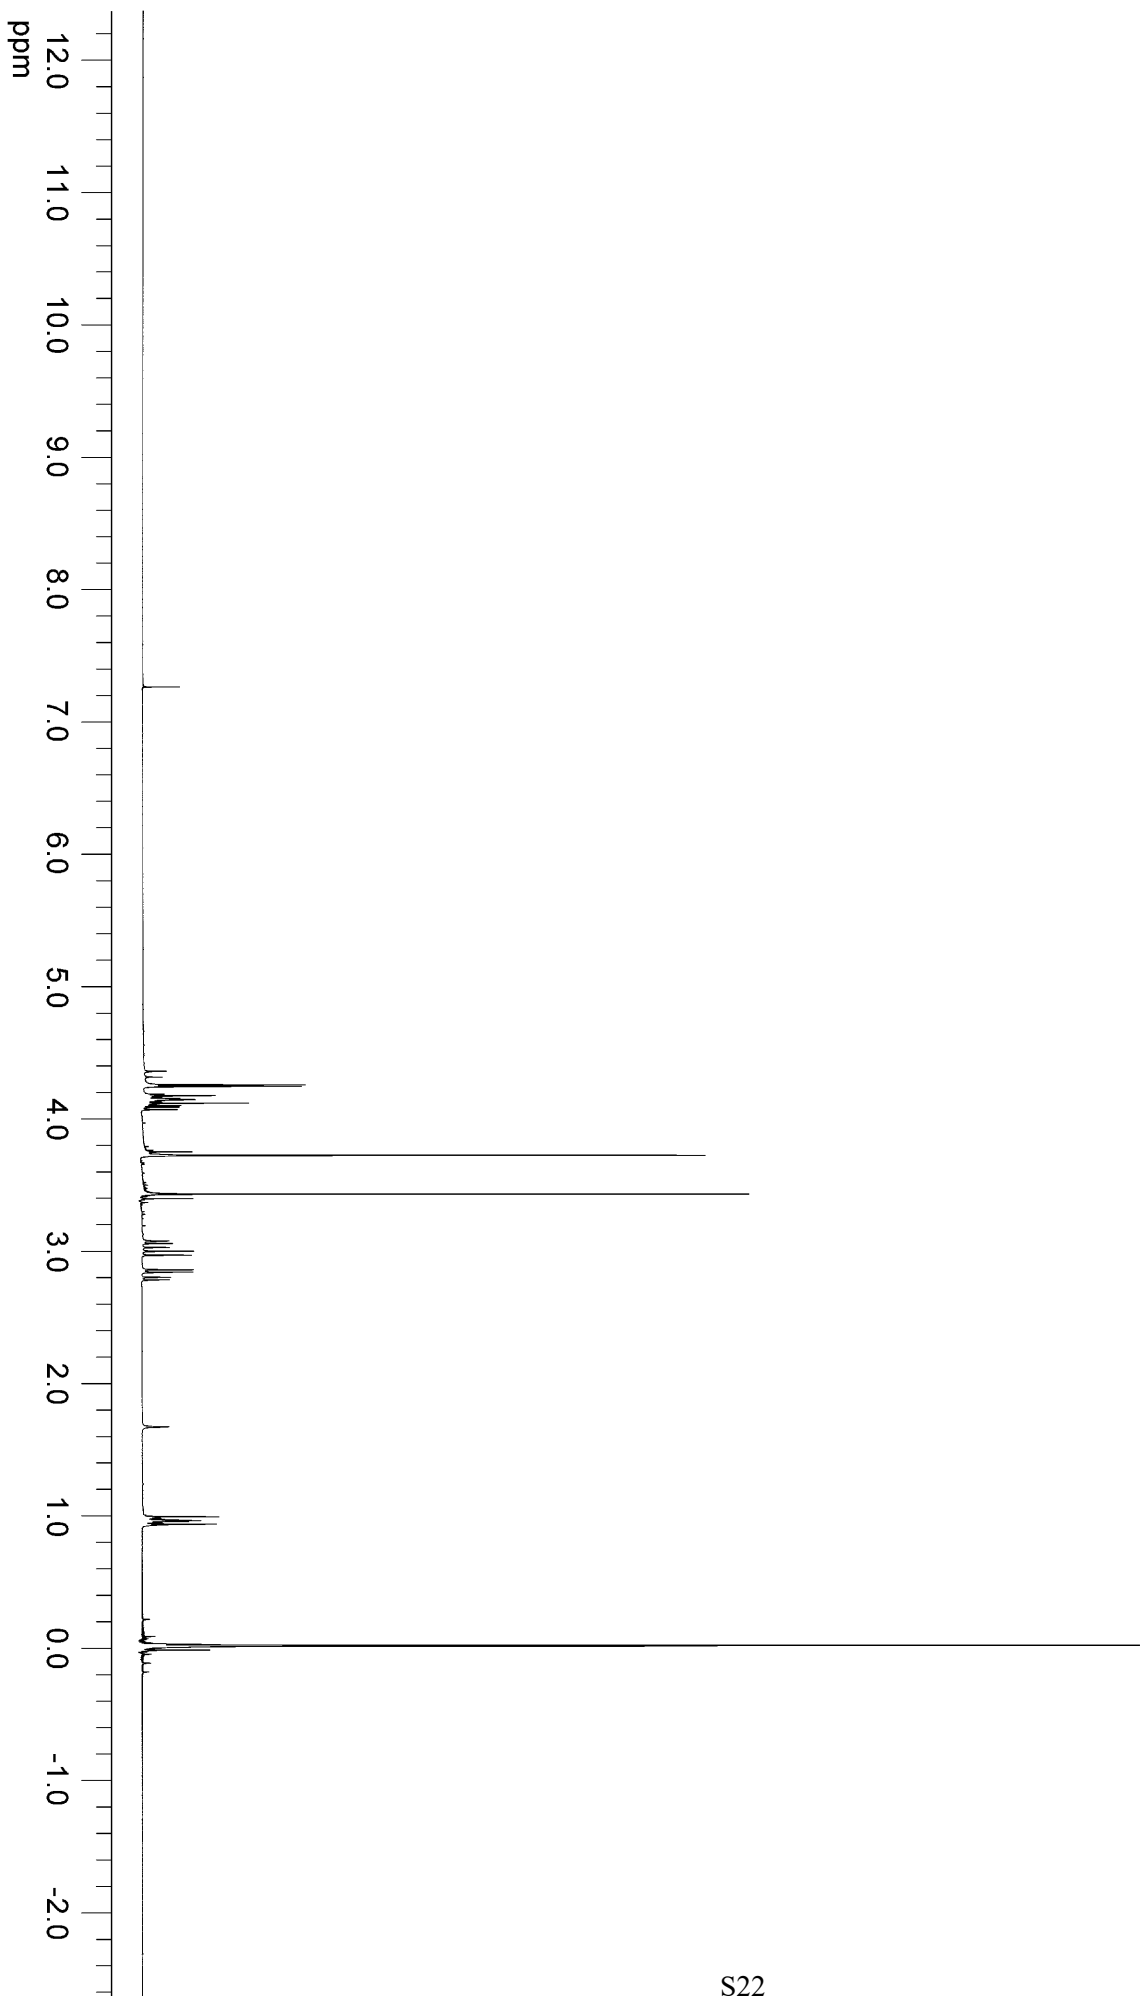

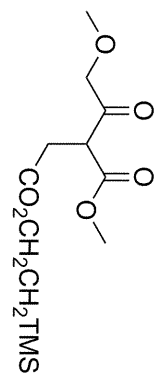

5-AcOEtTMS

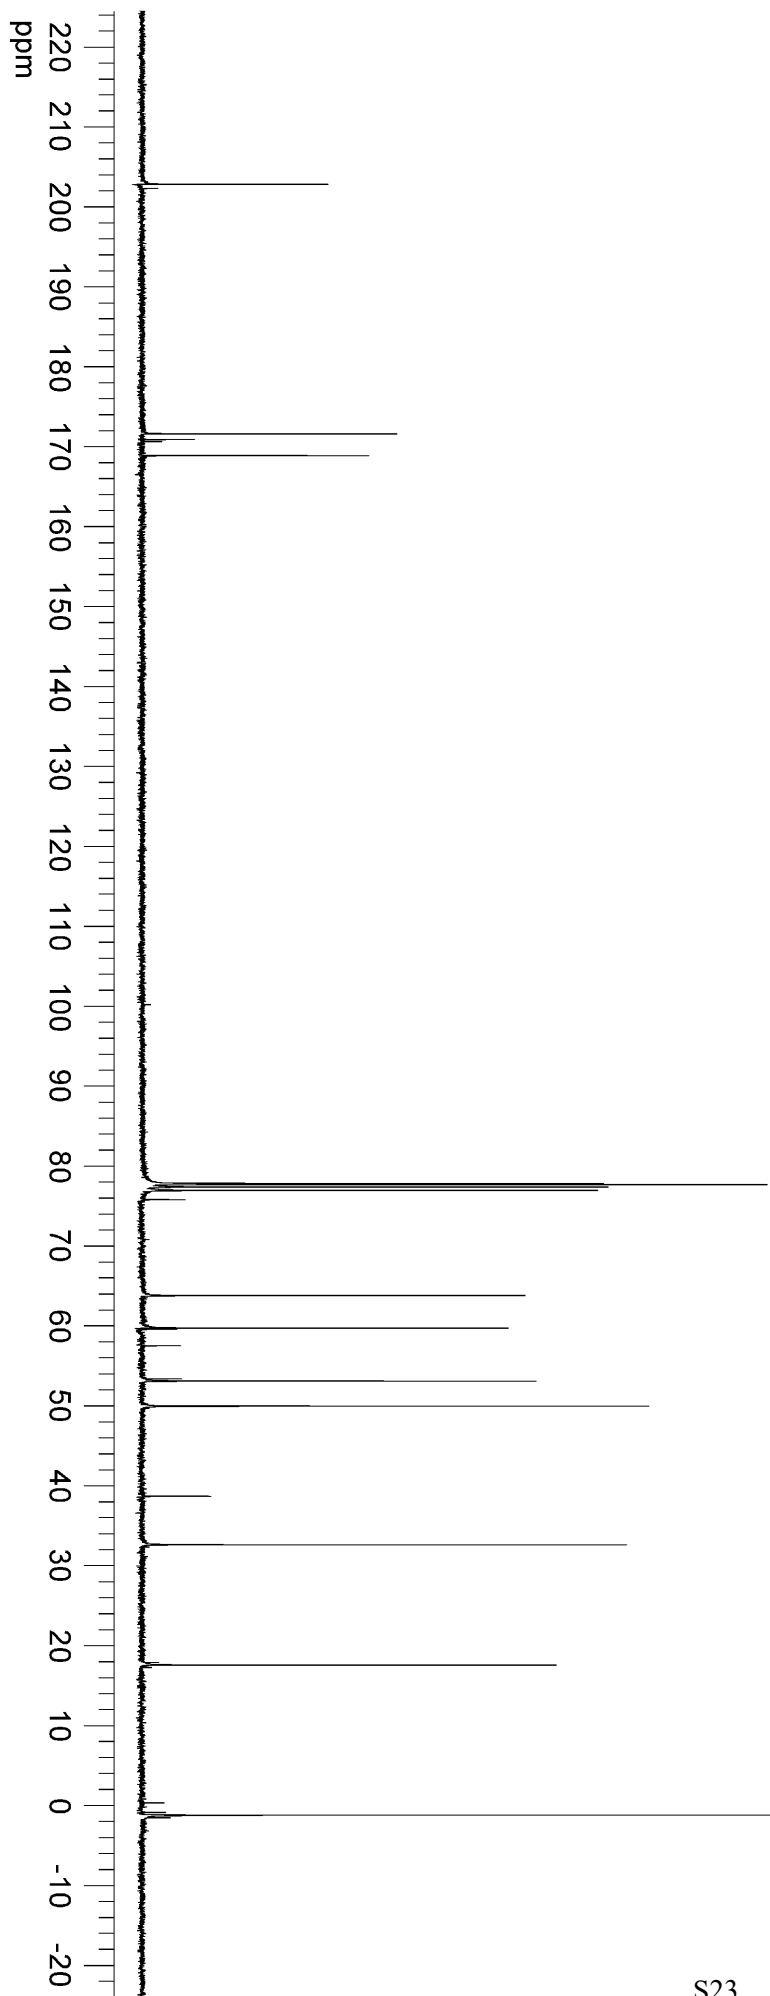

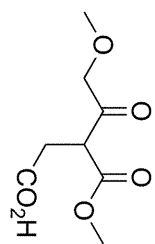

5-ACOH

+

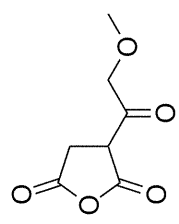

5-ACOH'

inseparable mixture

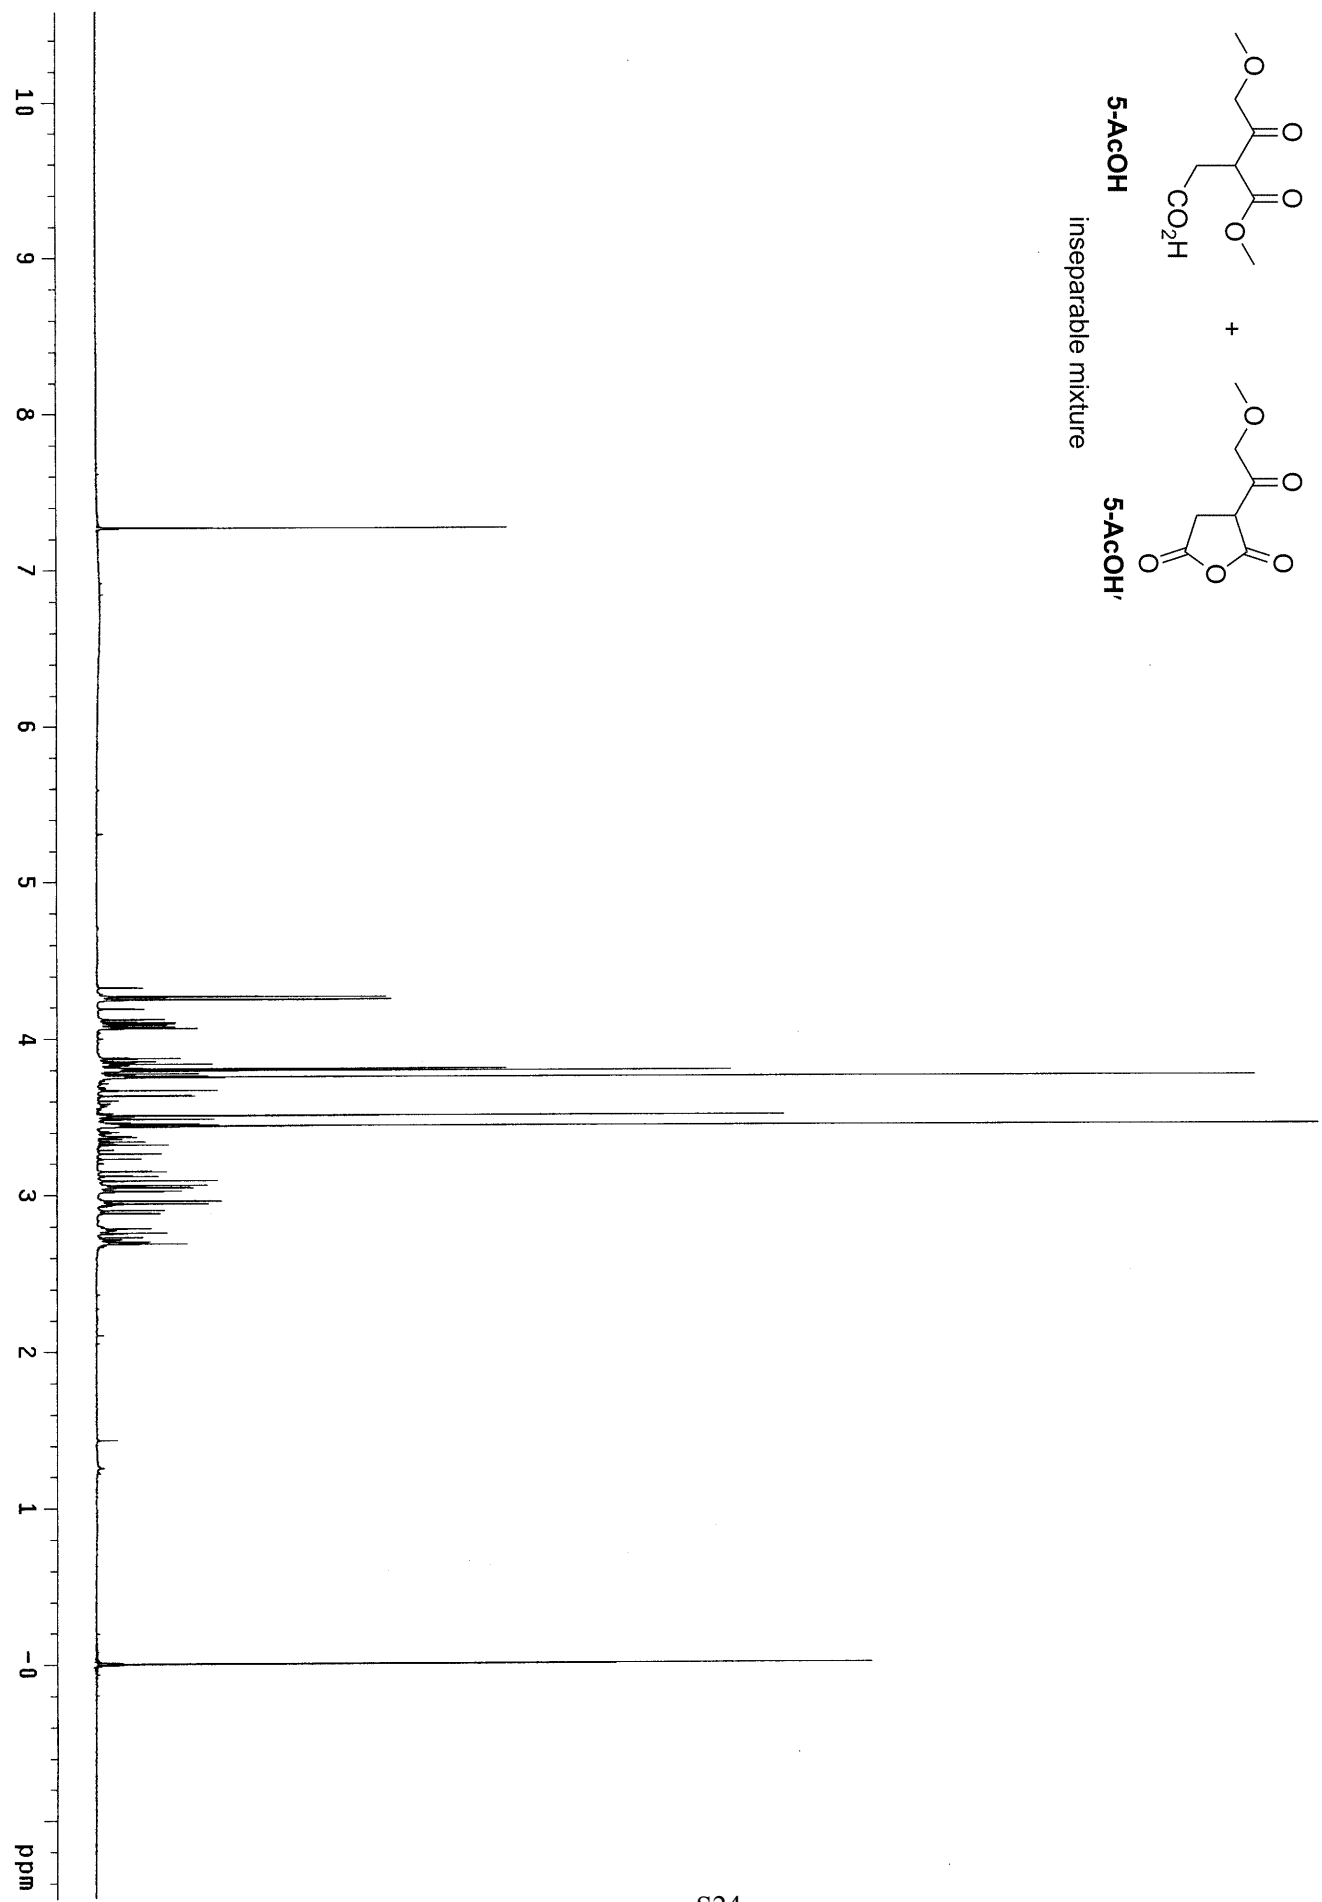



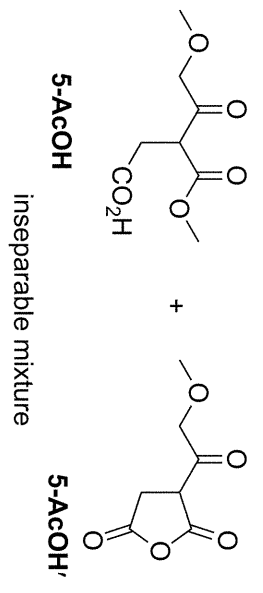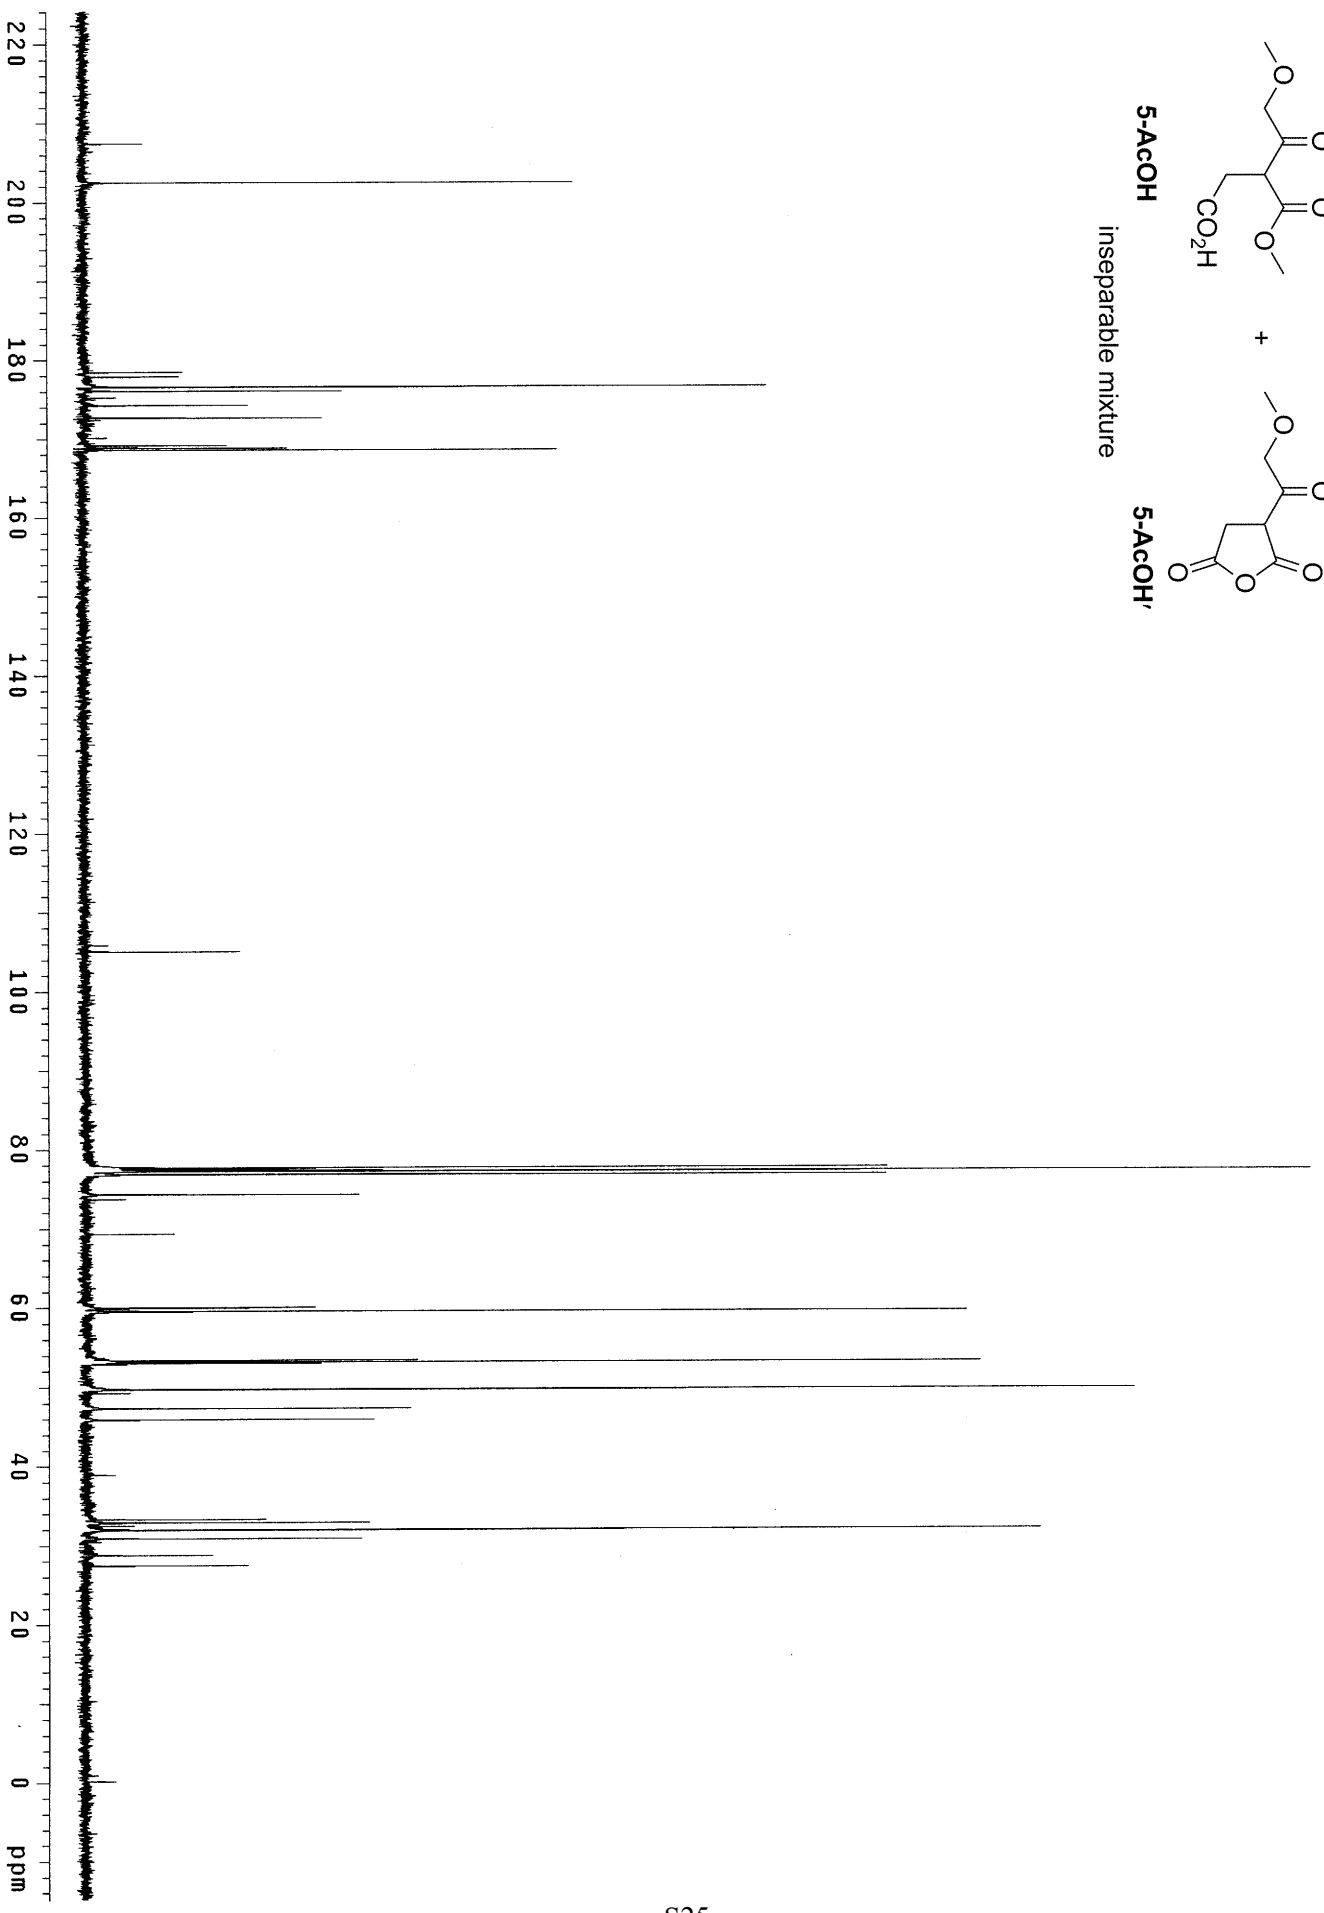

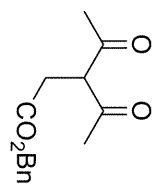

6-AcOBn

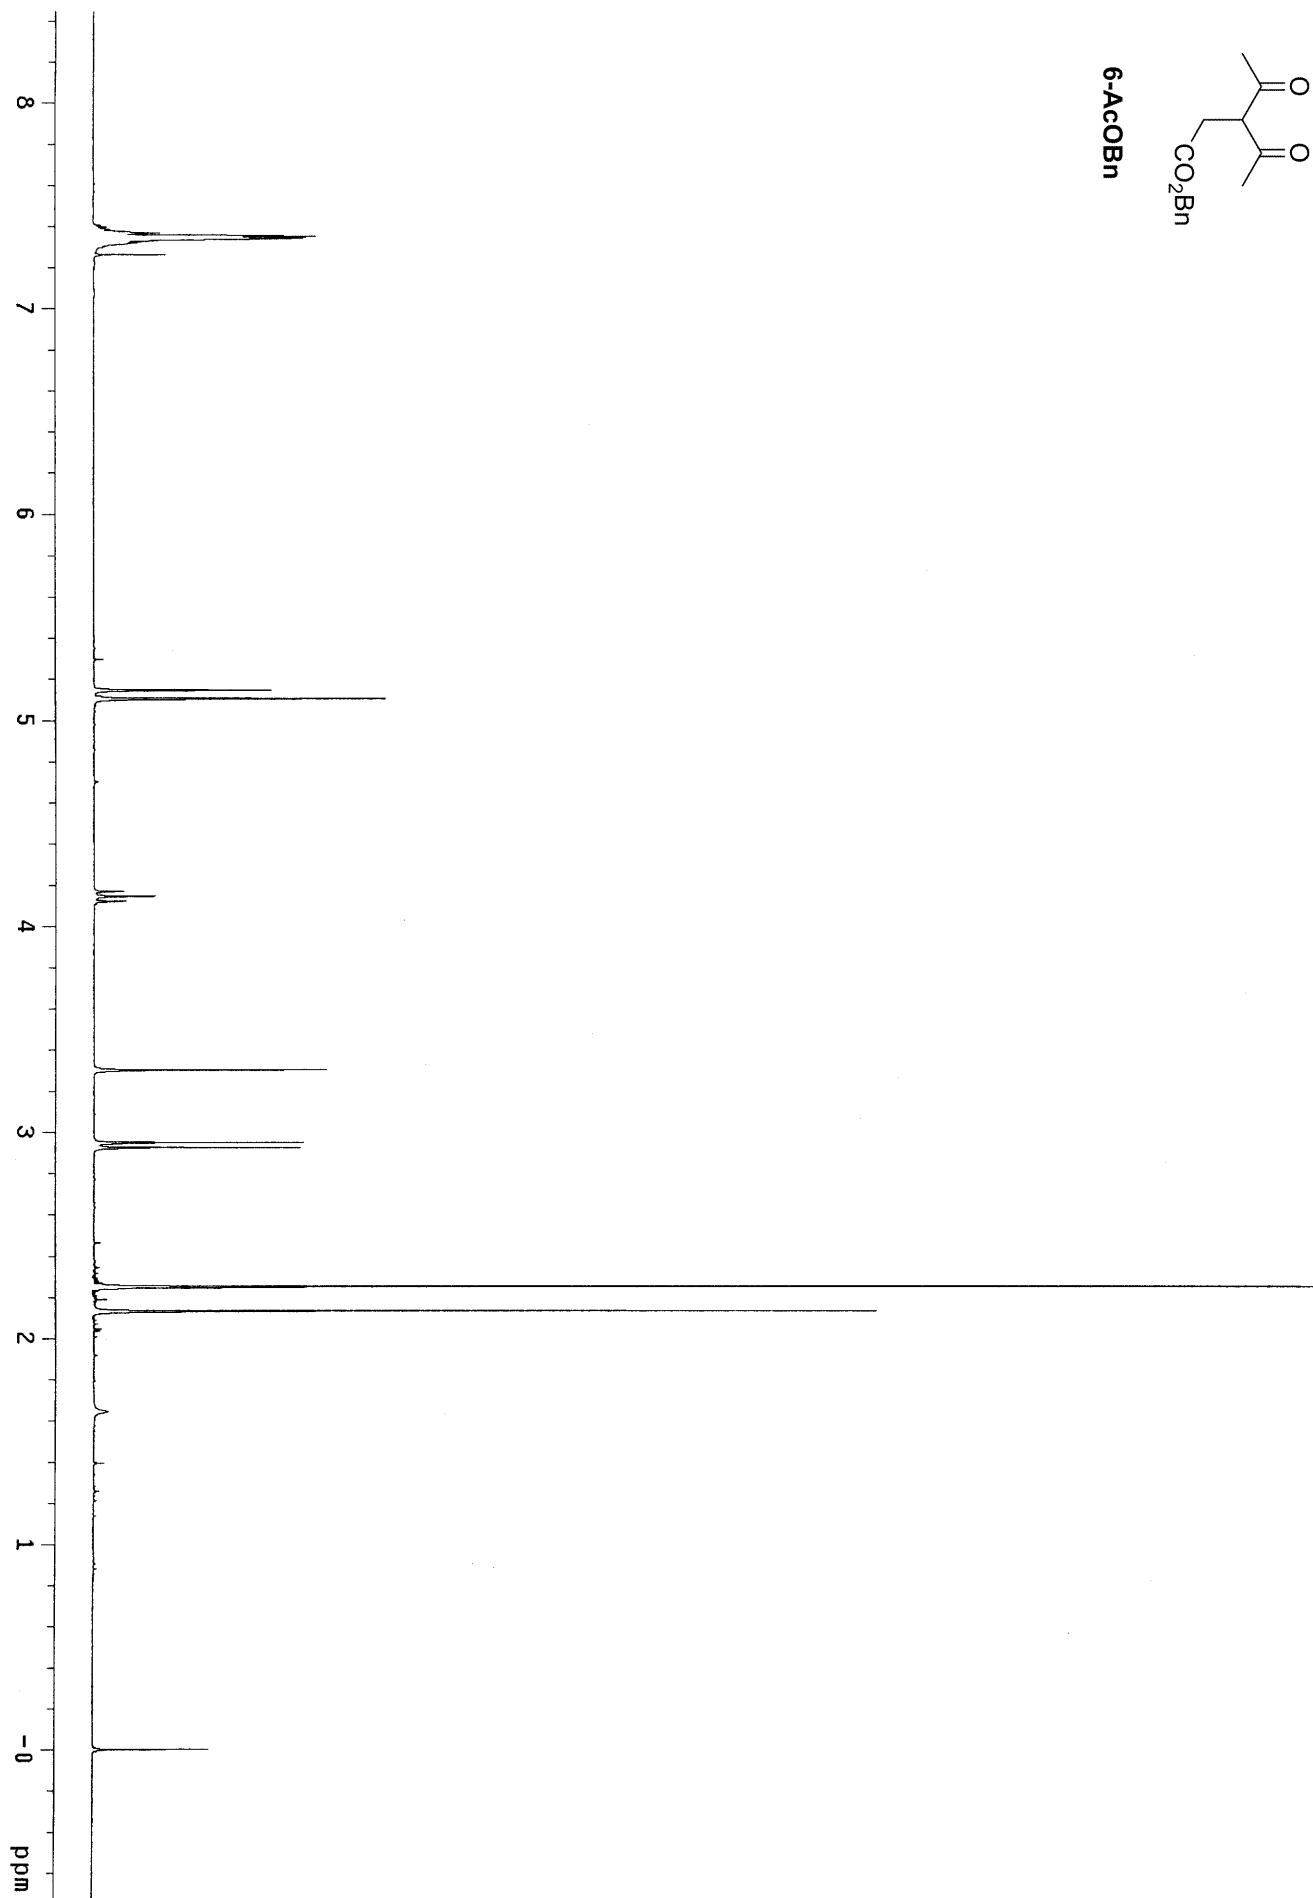

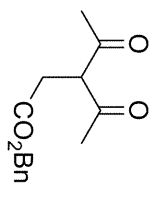

6-AcOBn

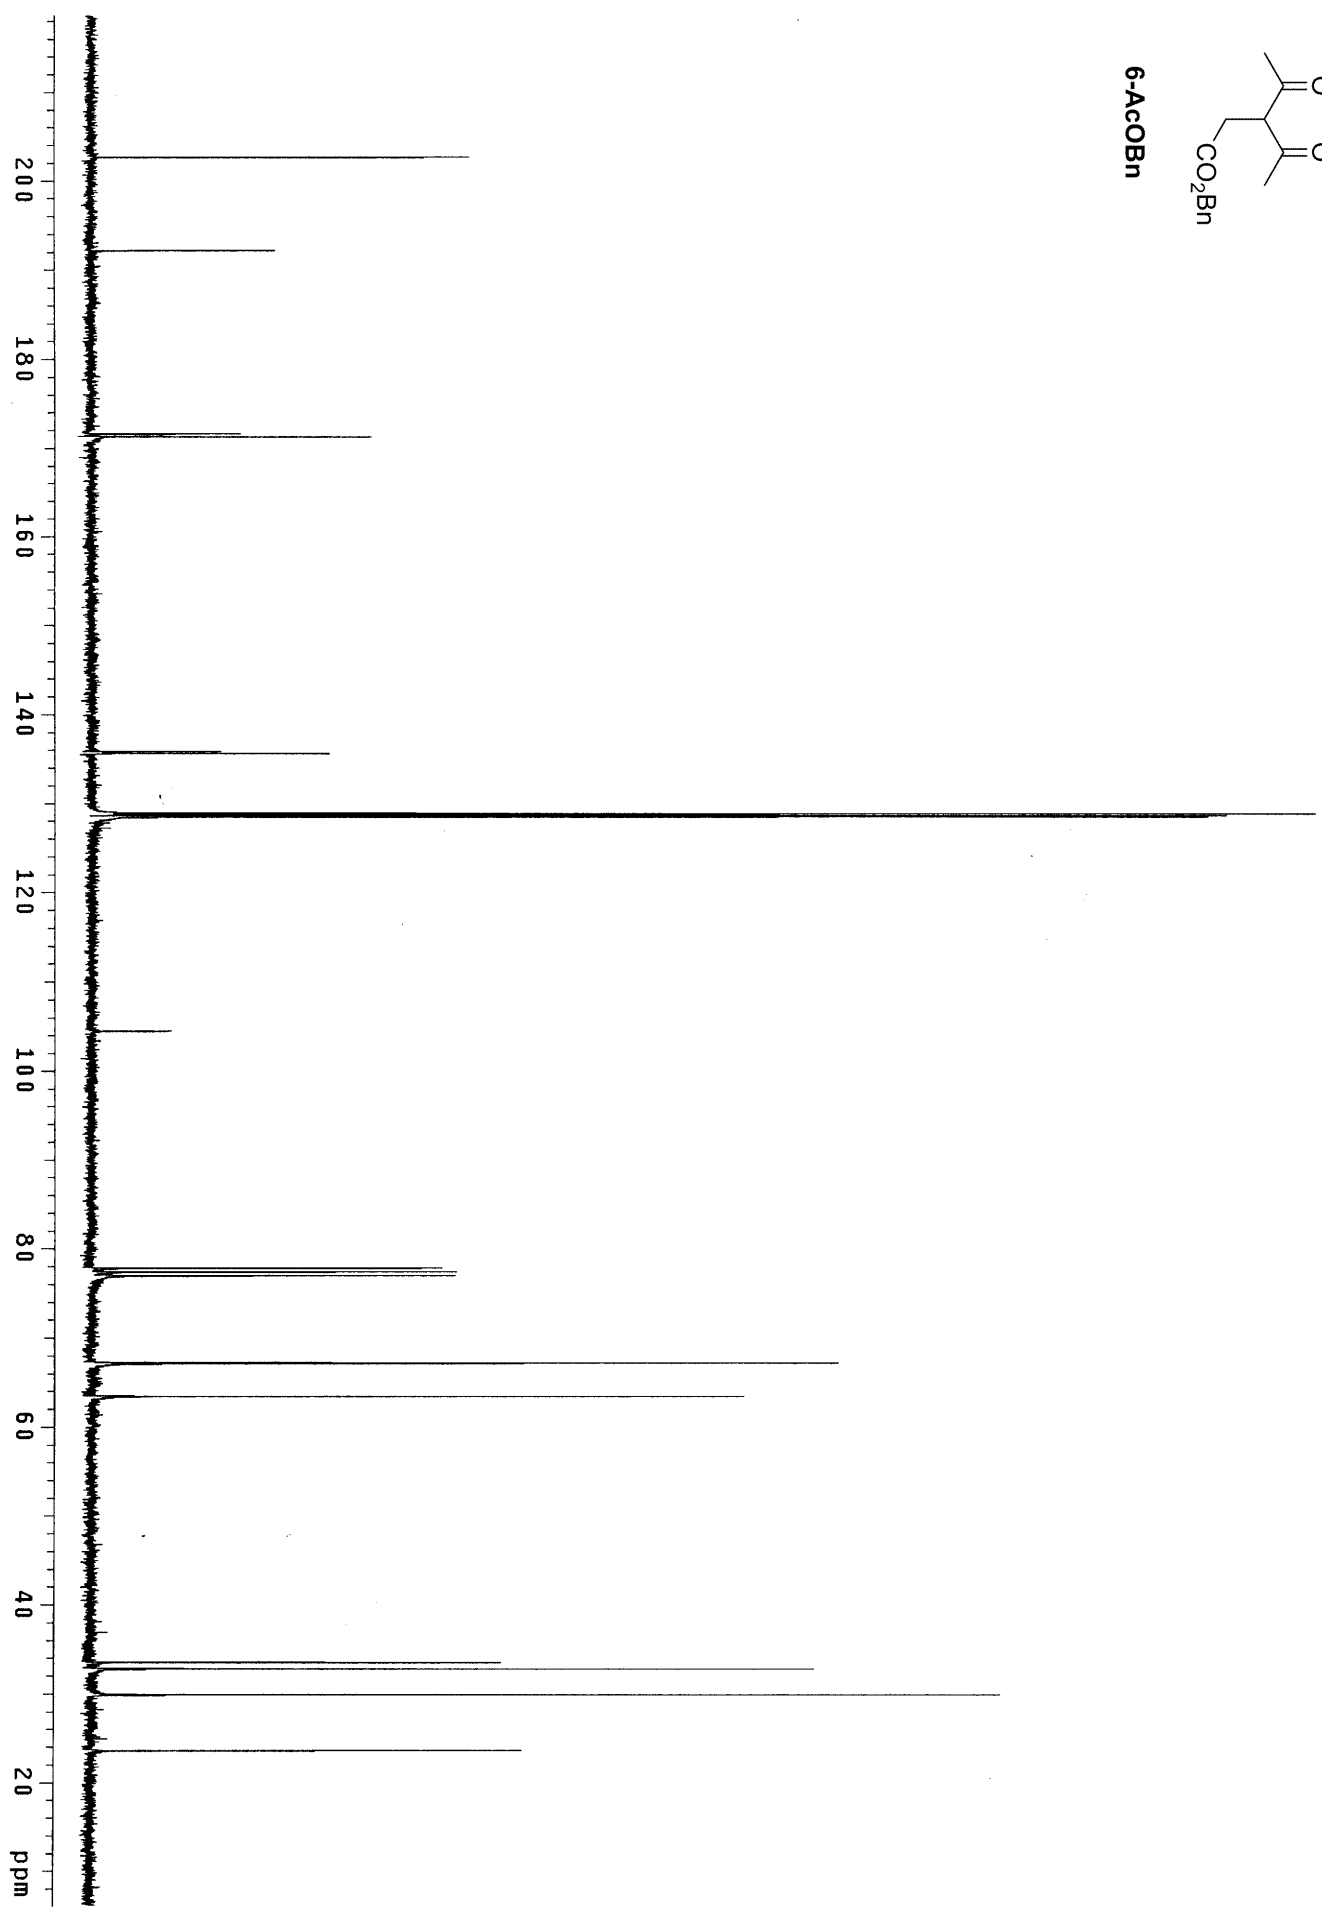

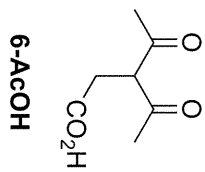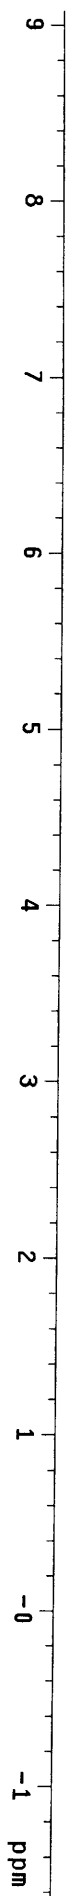

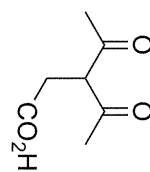

6-AcOH

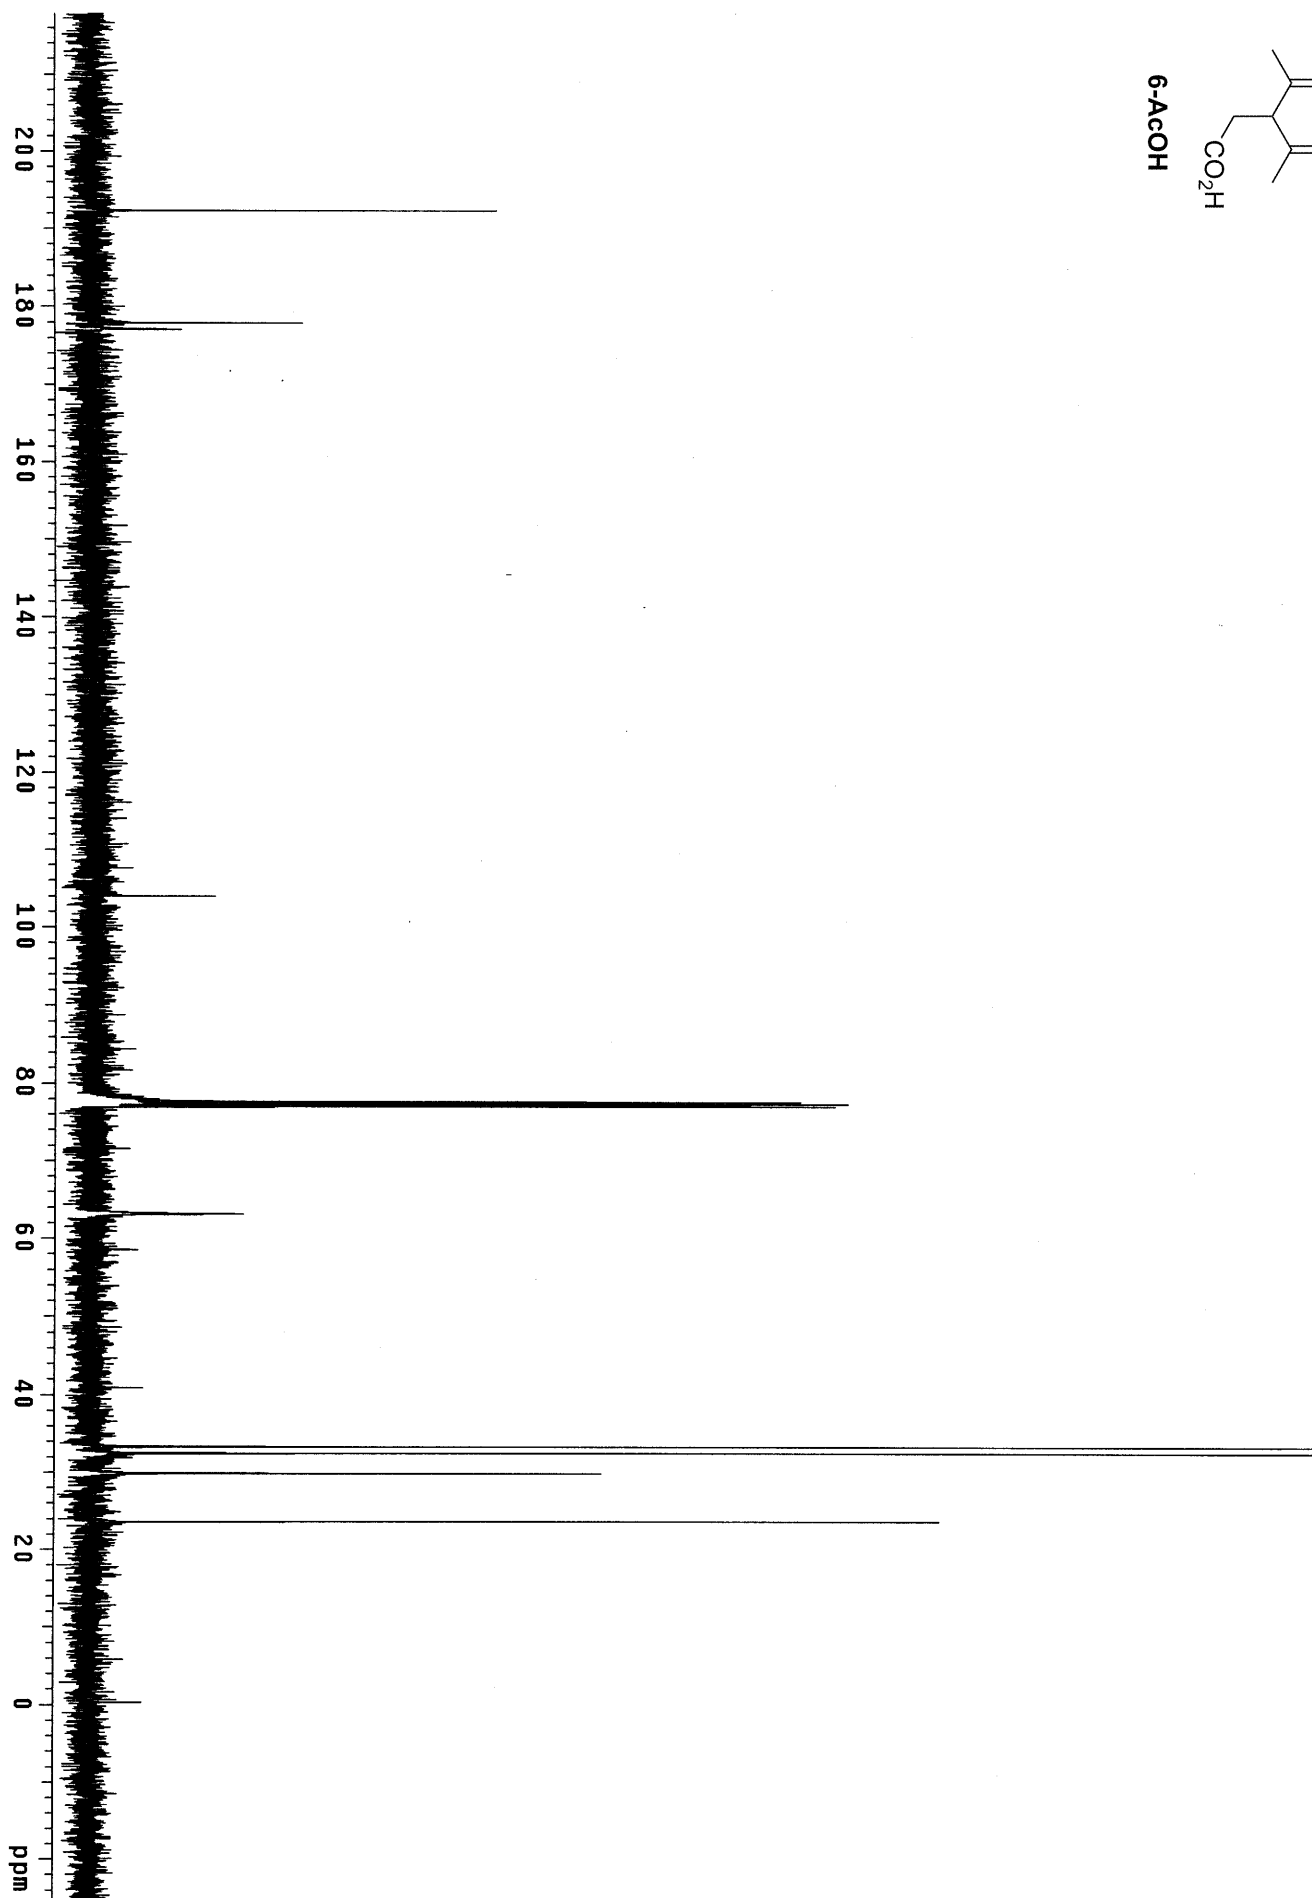

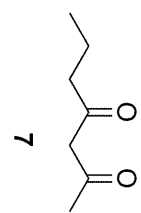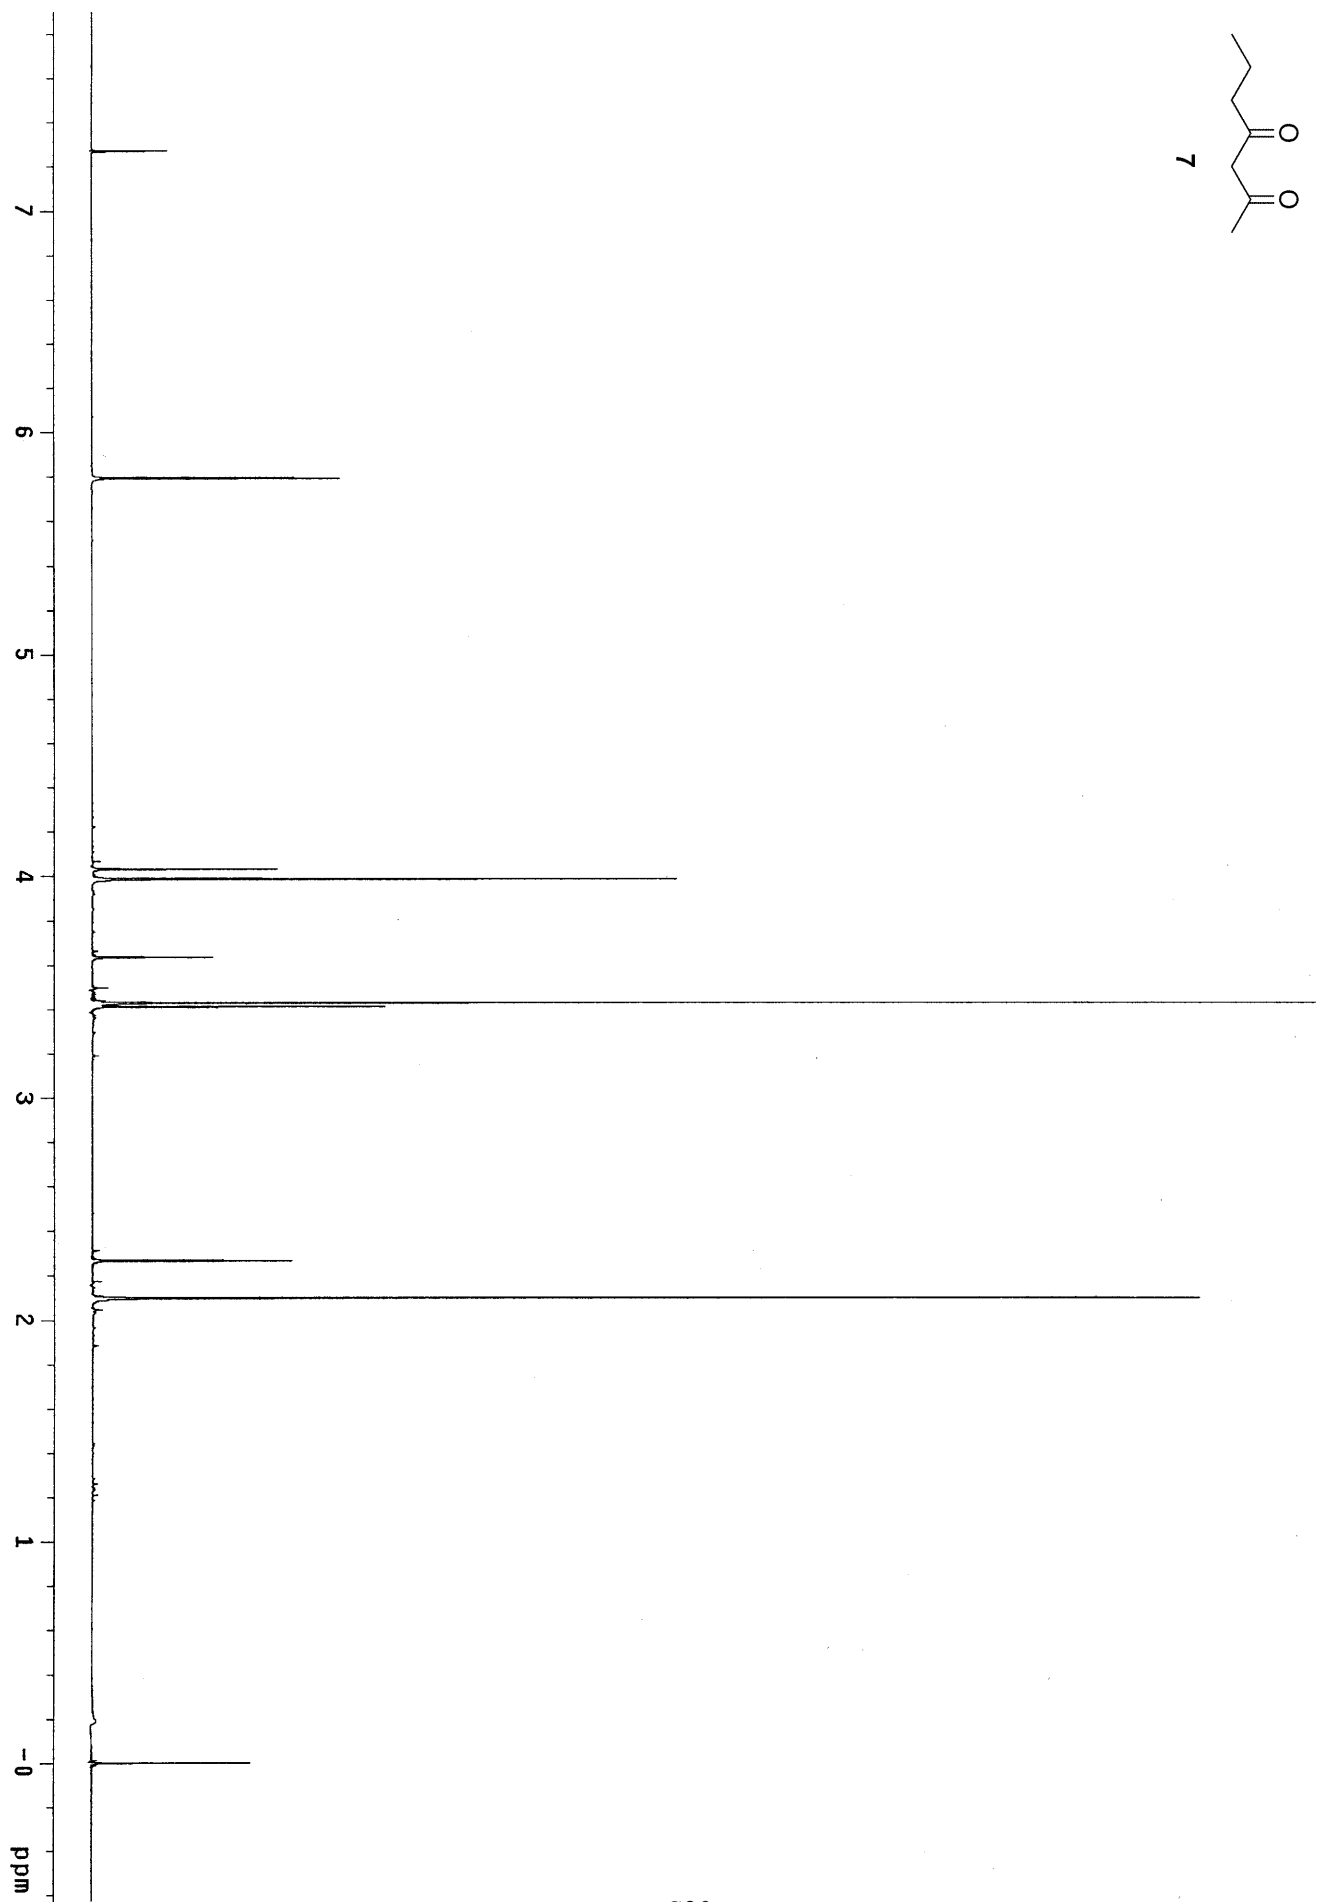

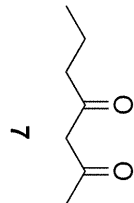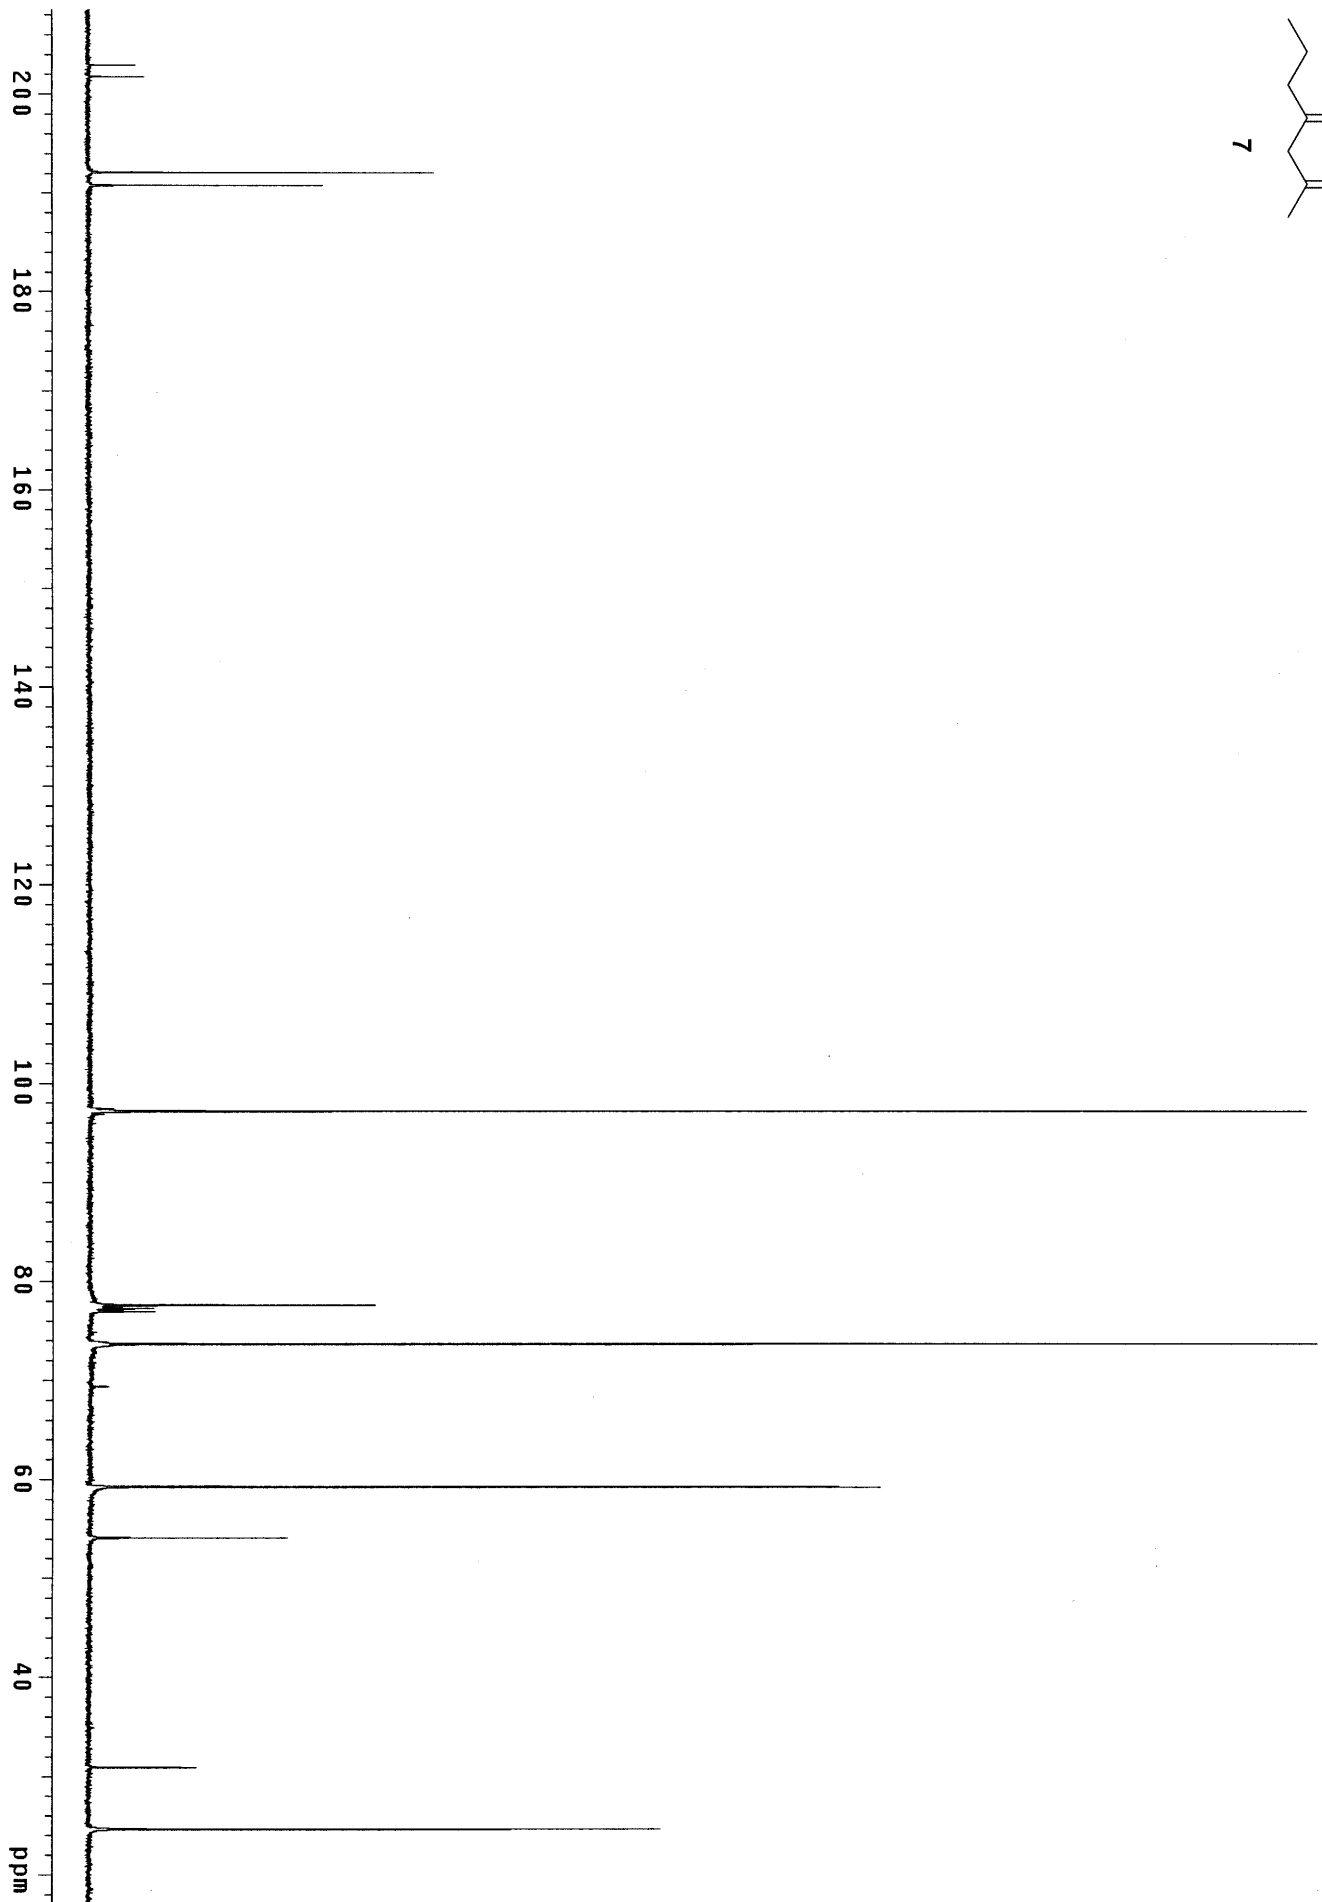

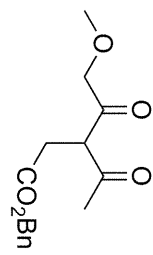

7-AcOBn

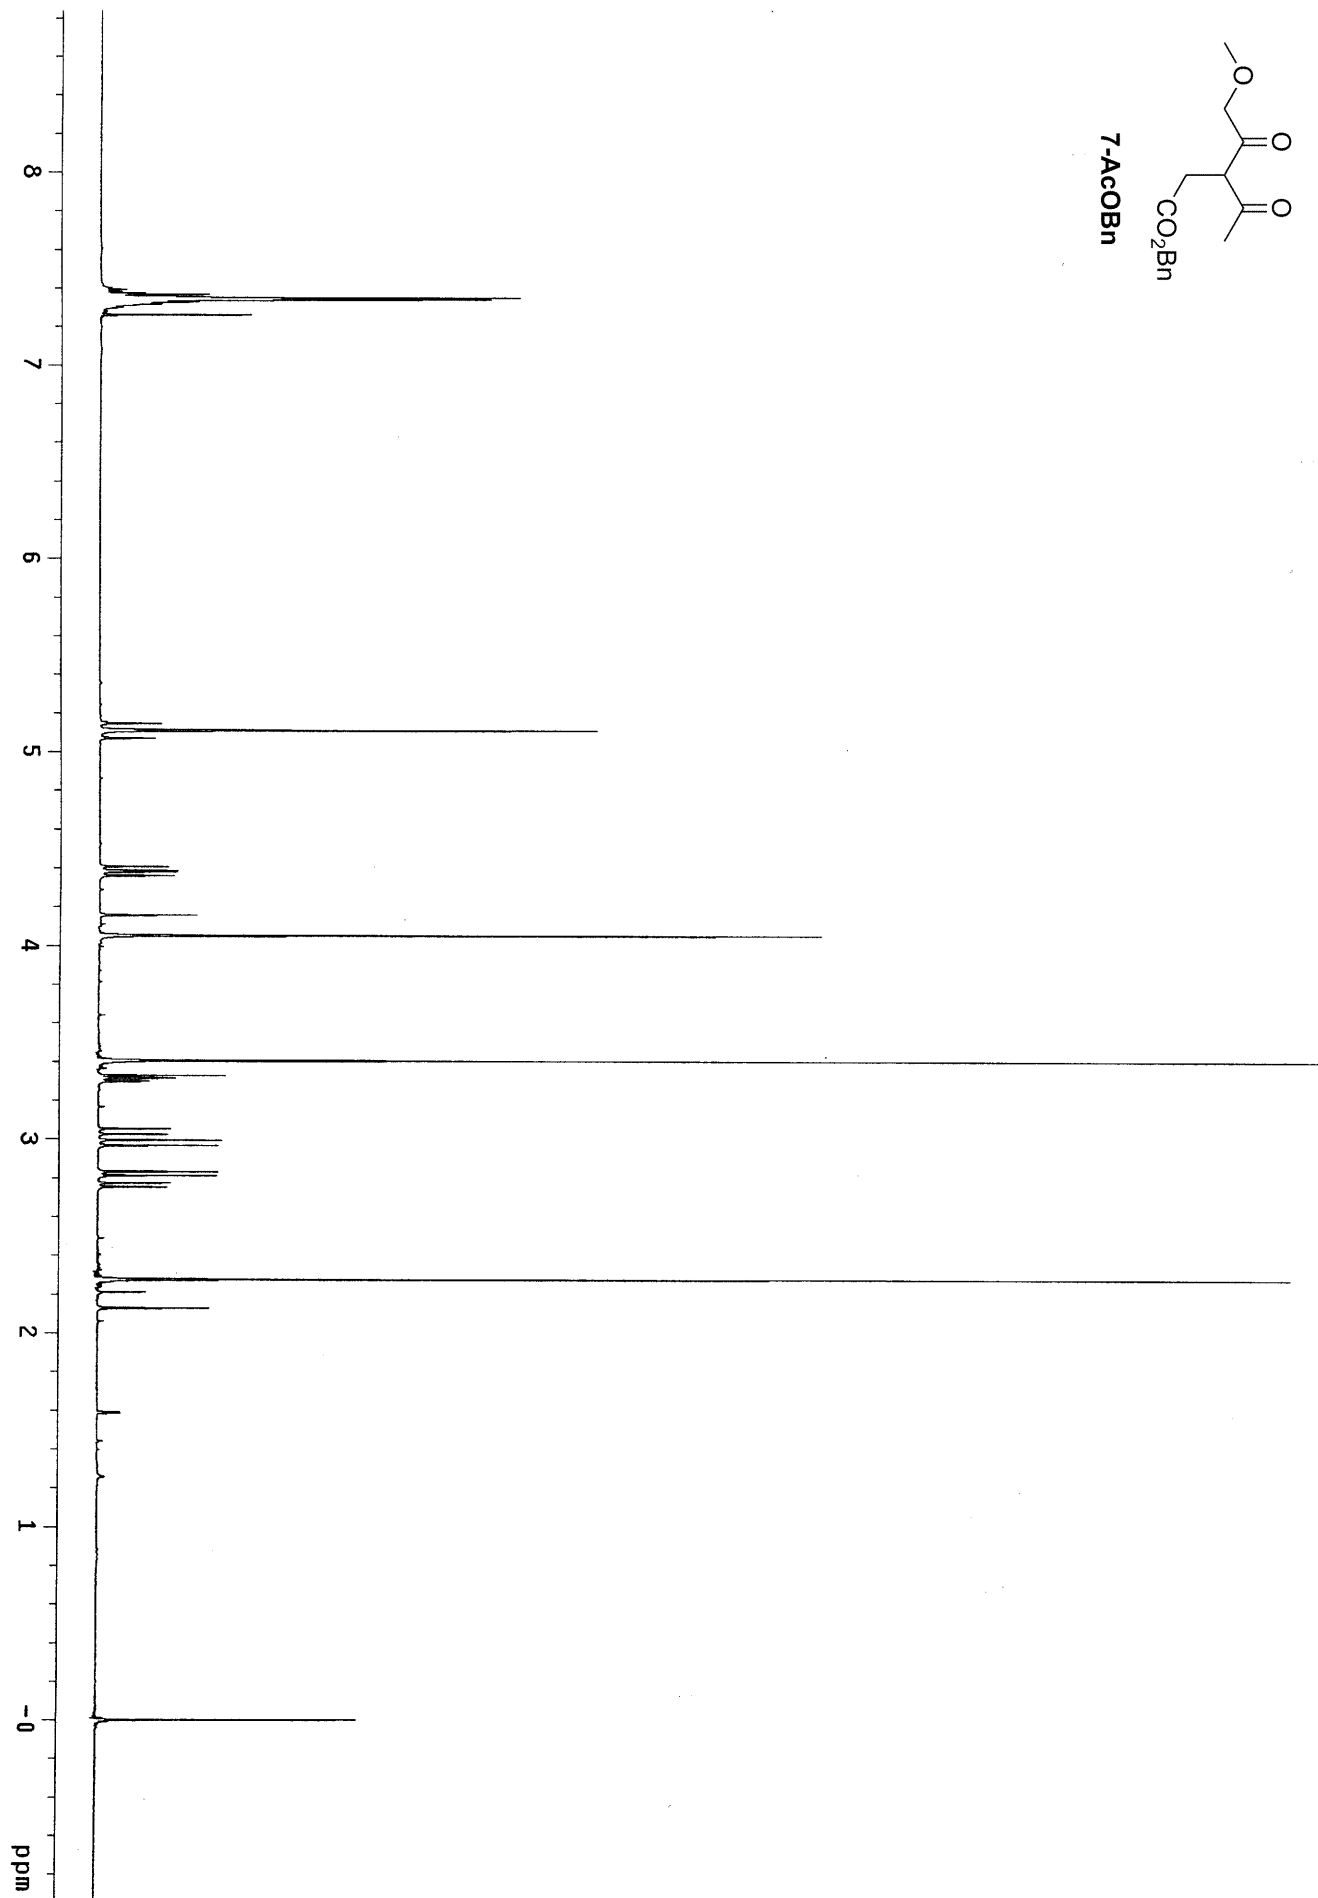



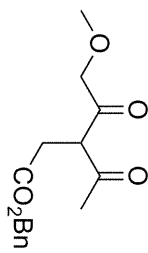

7-AcOBn

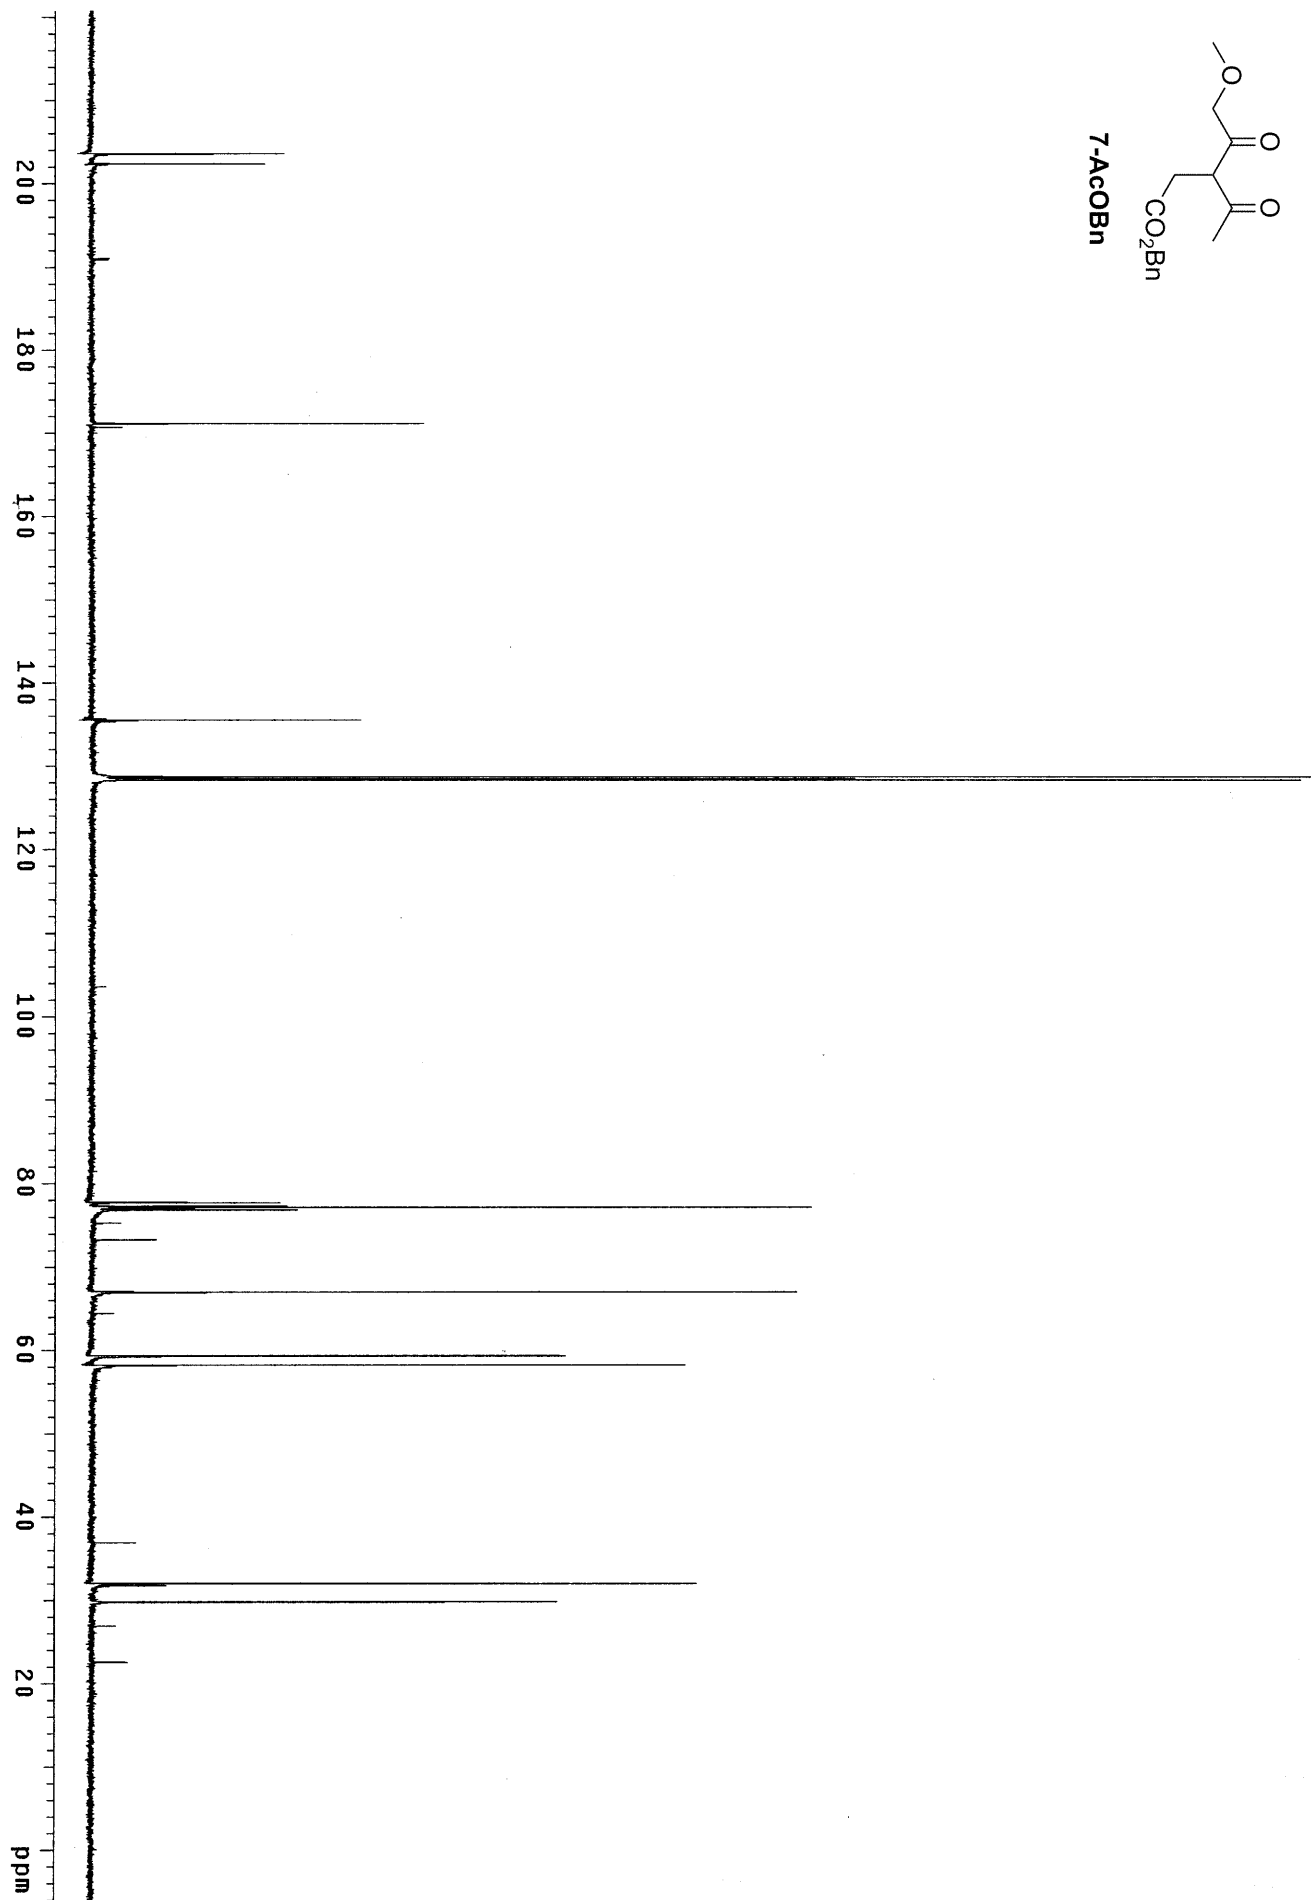

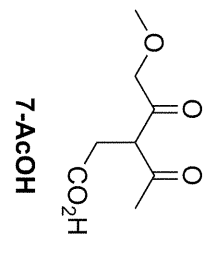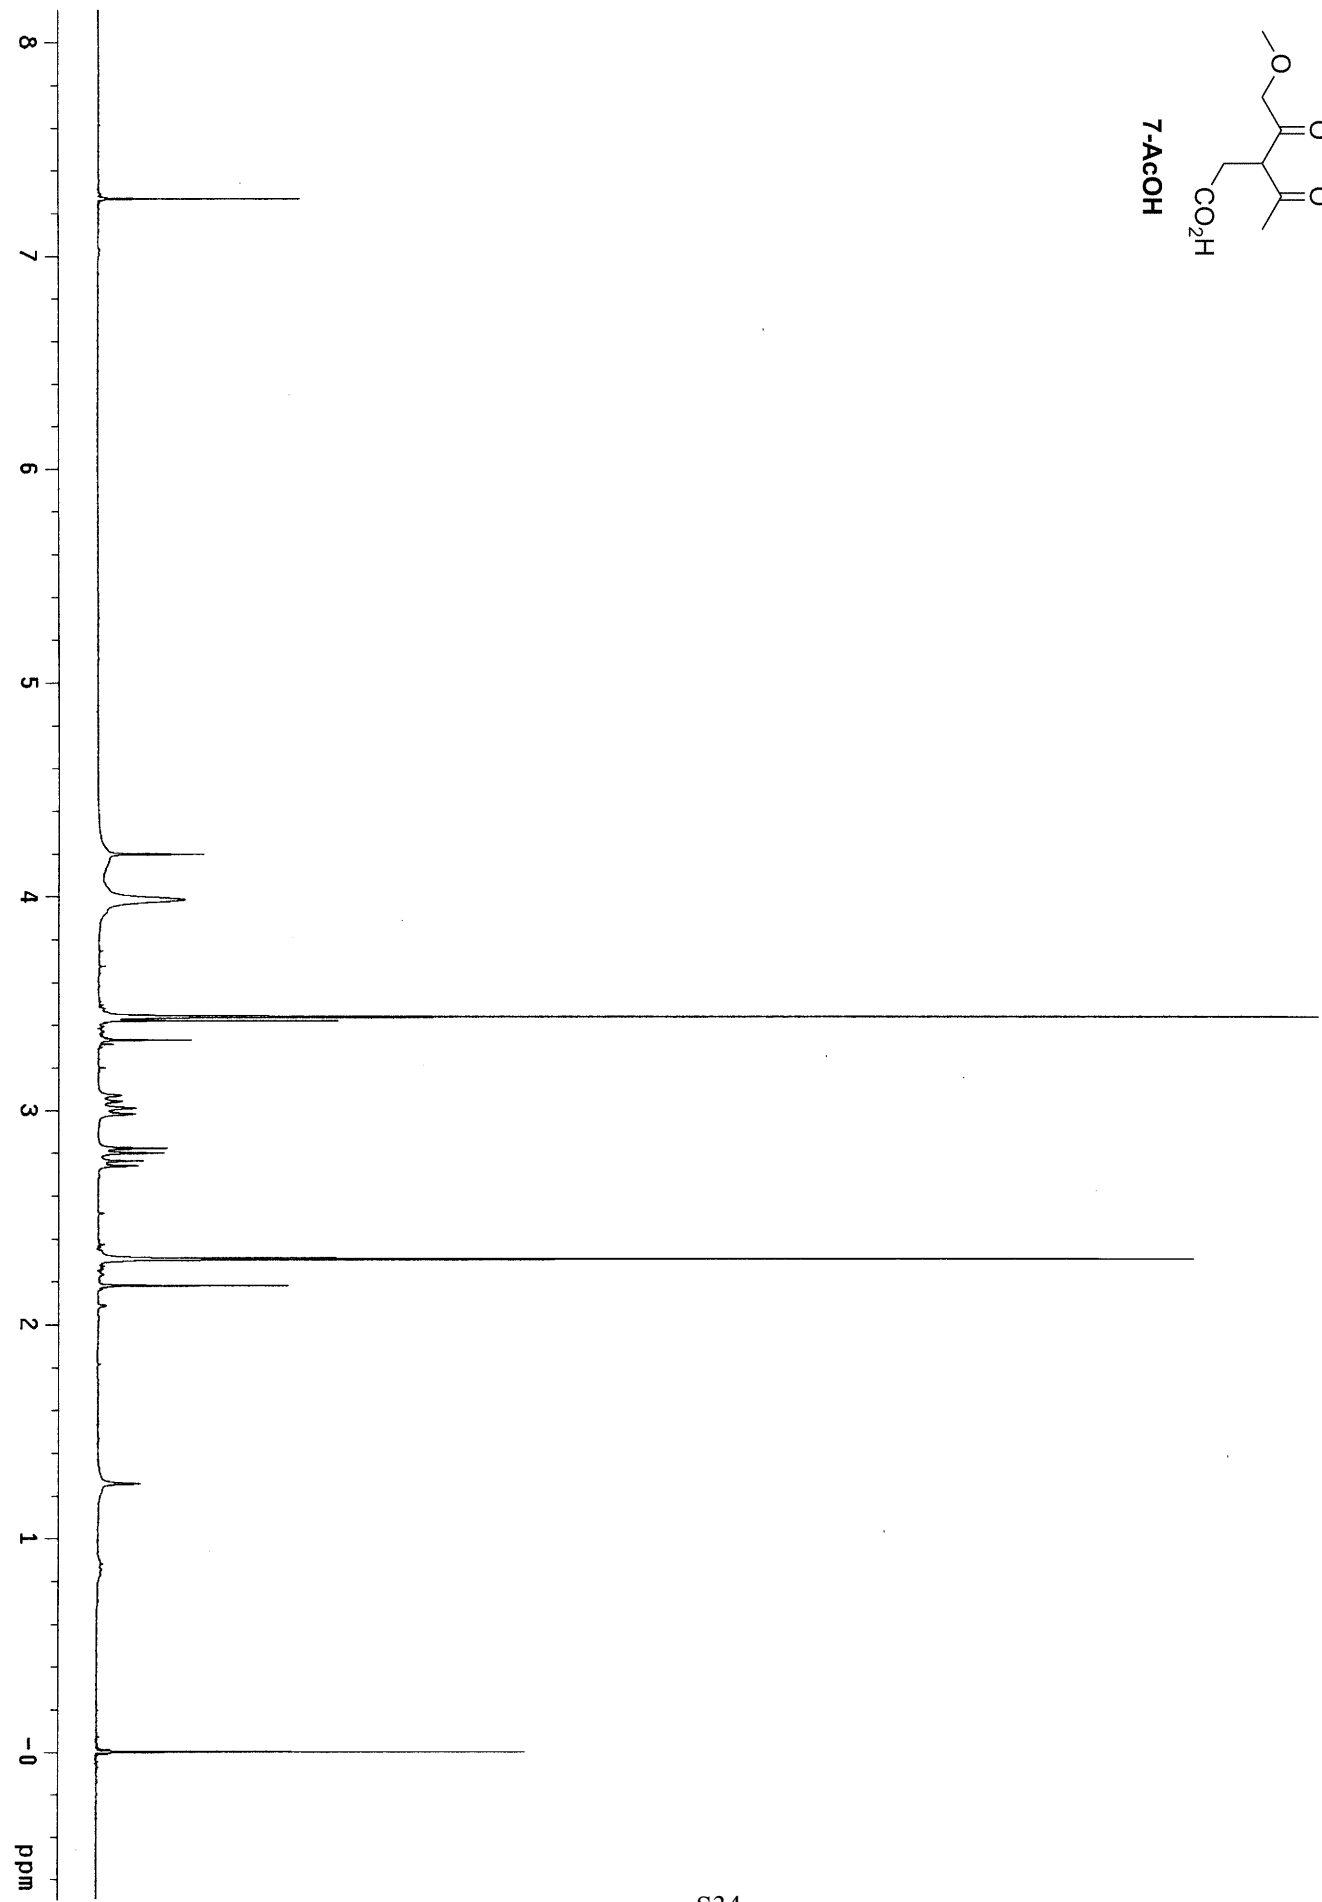

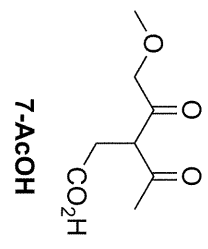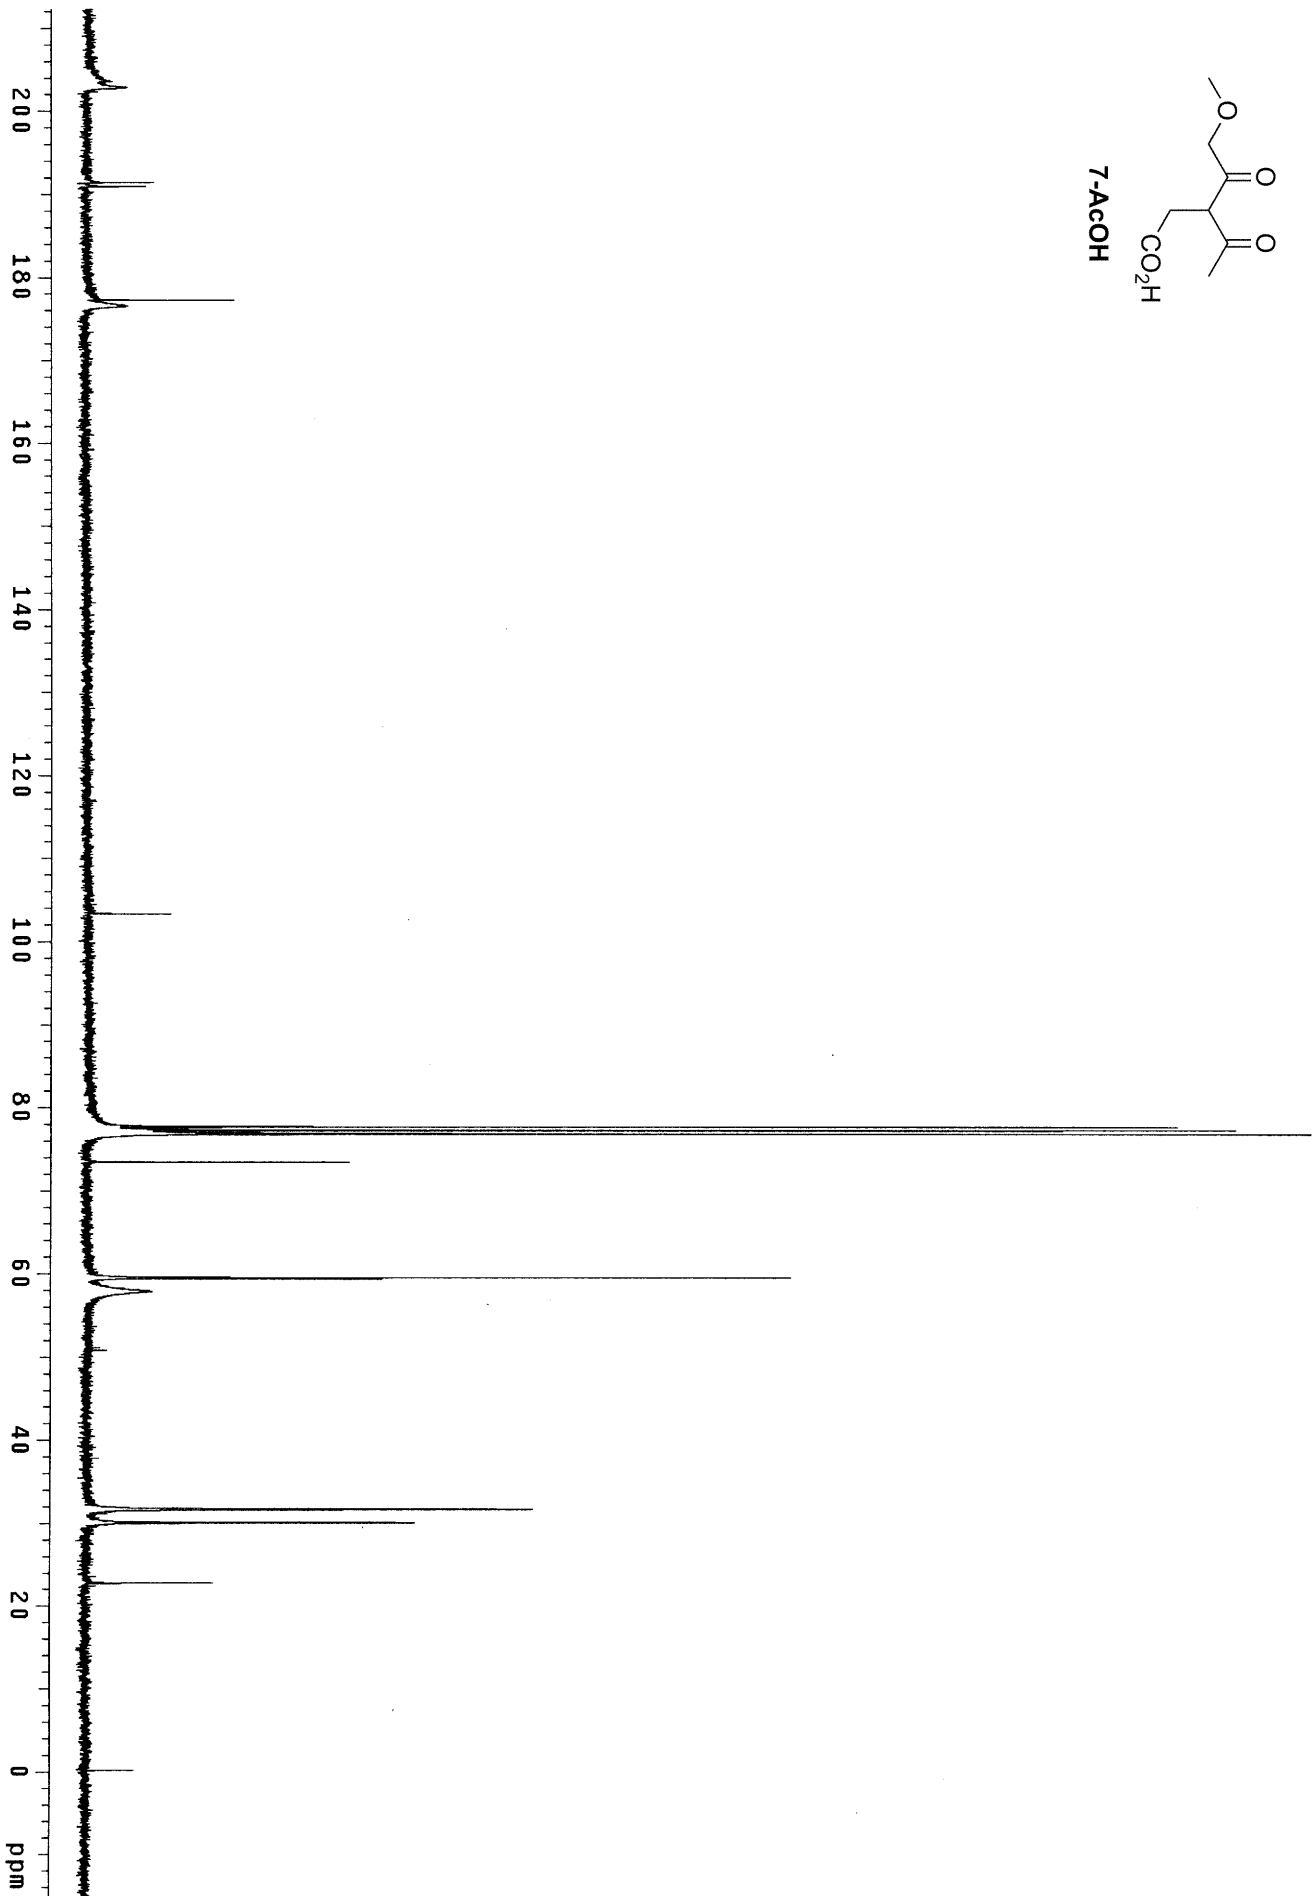

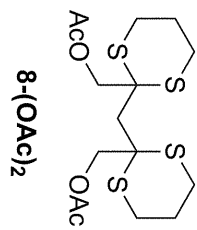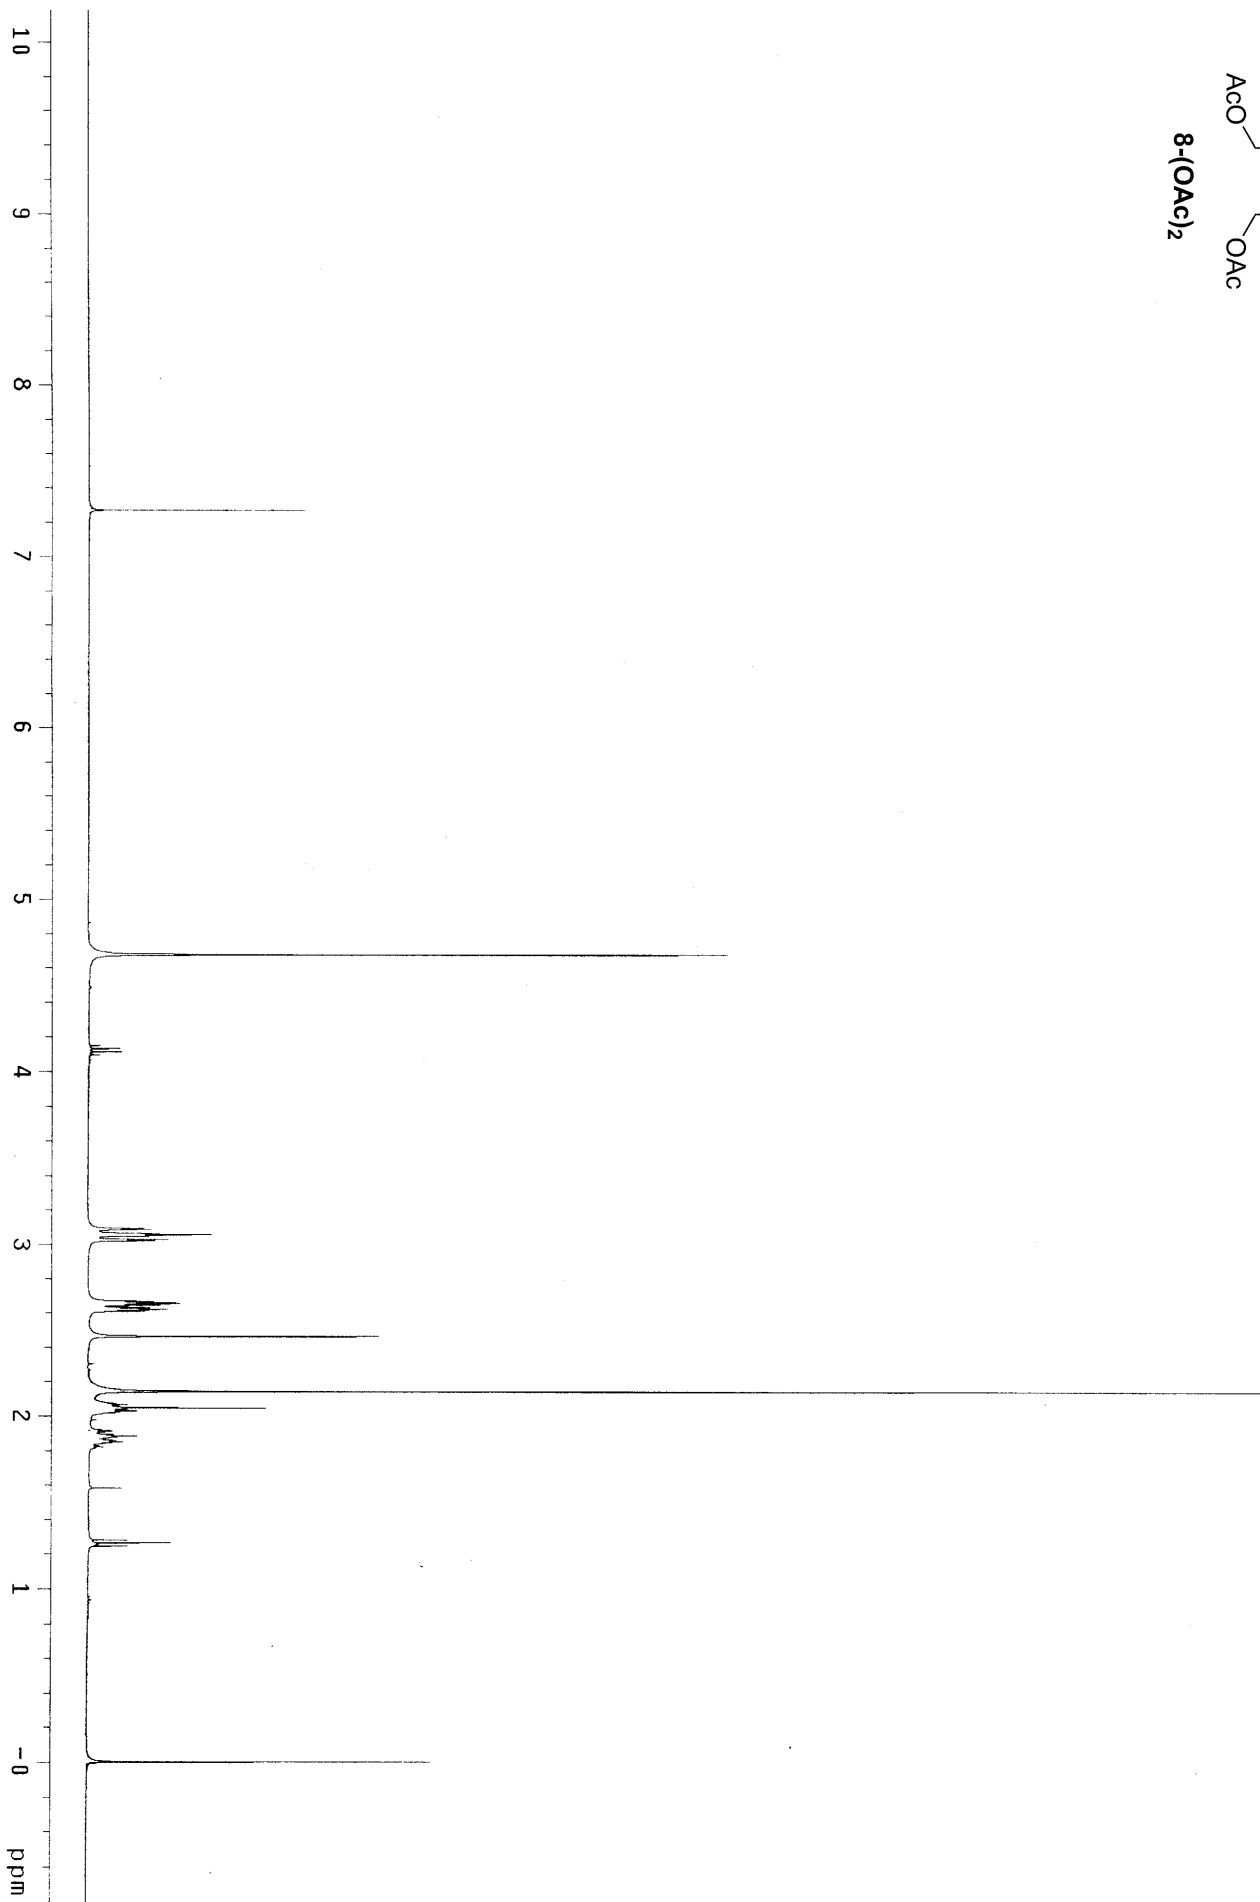

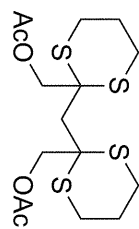

8-(OAc)<sub>2</sub>

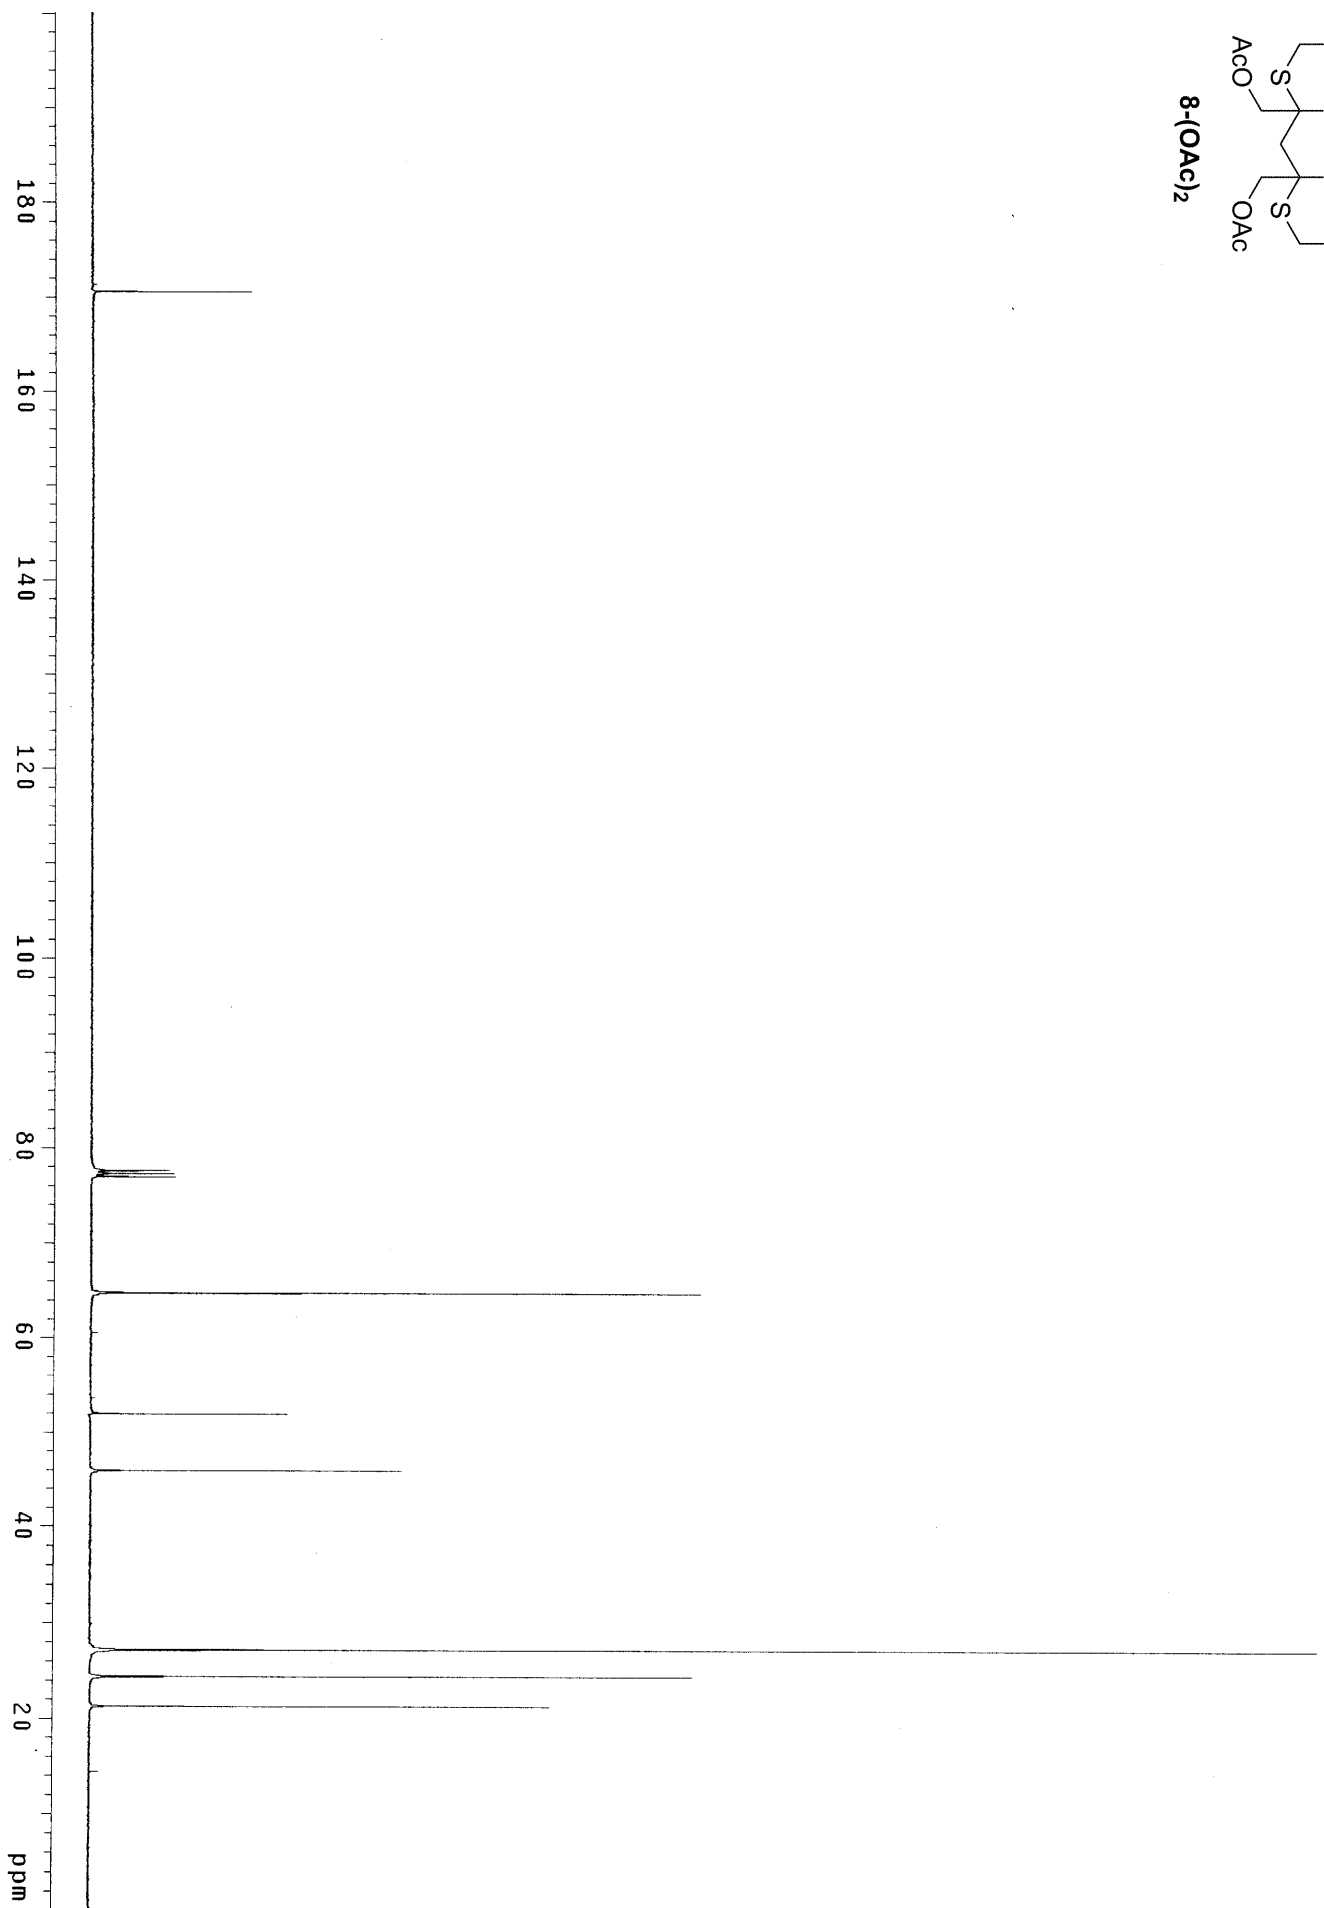

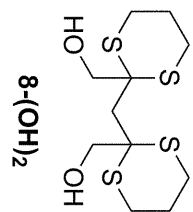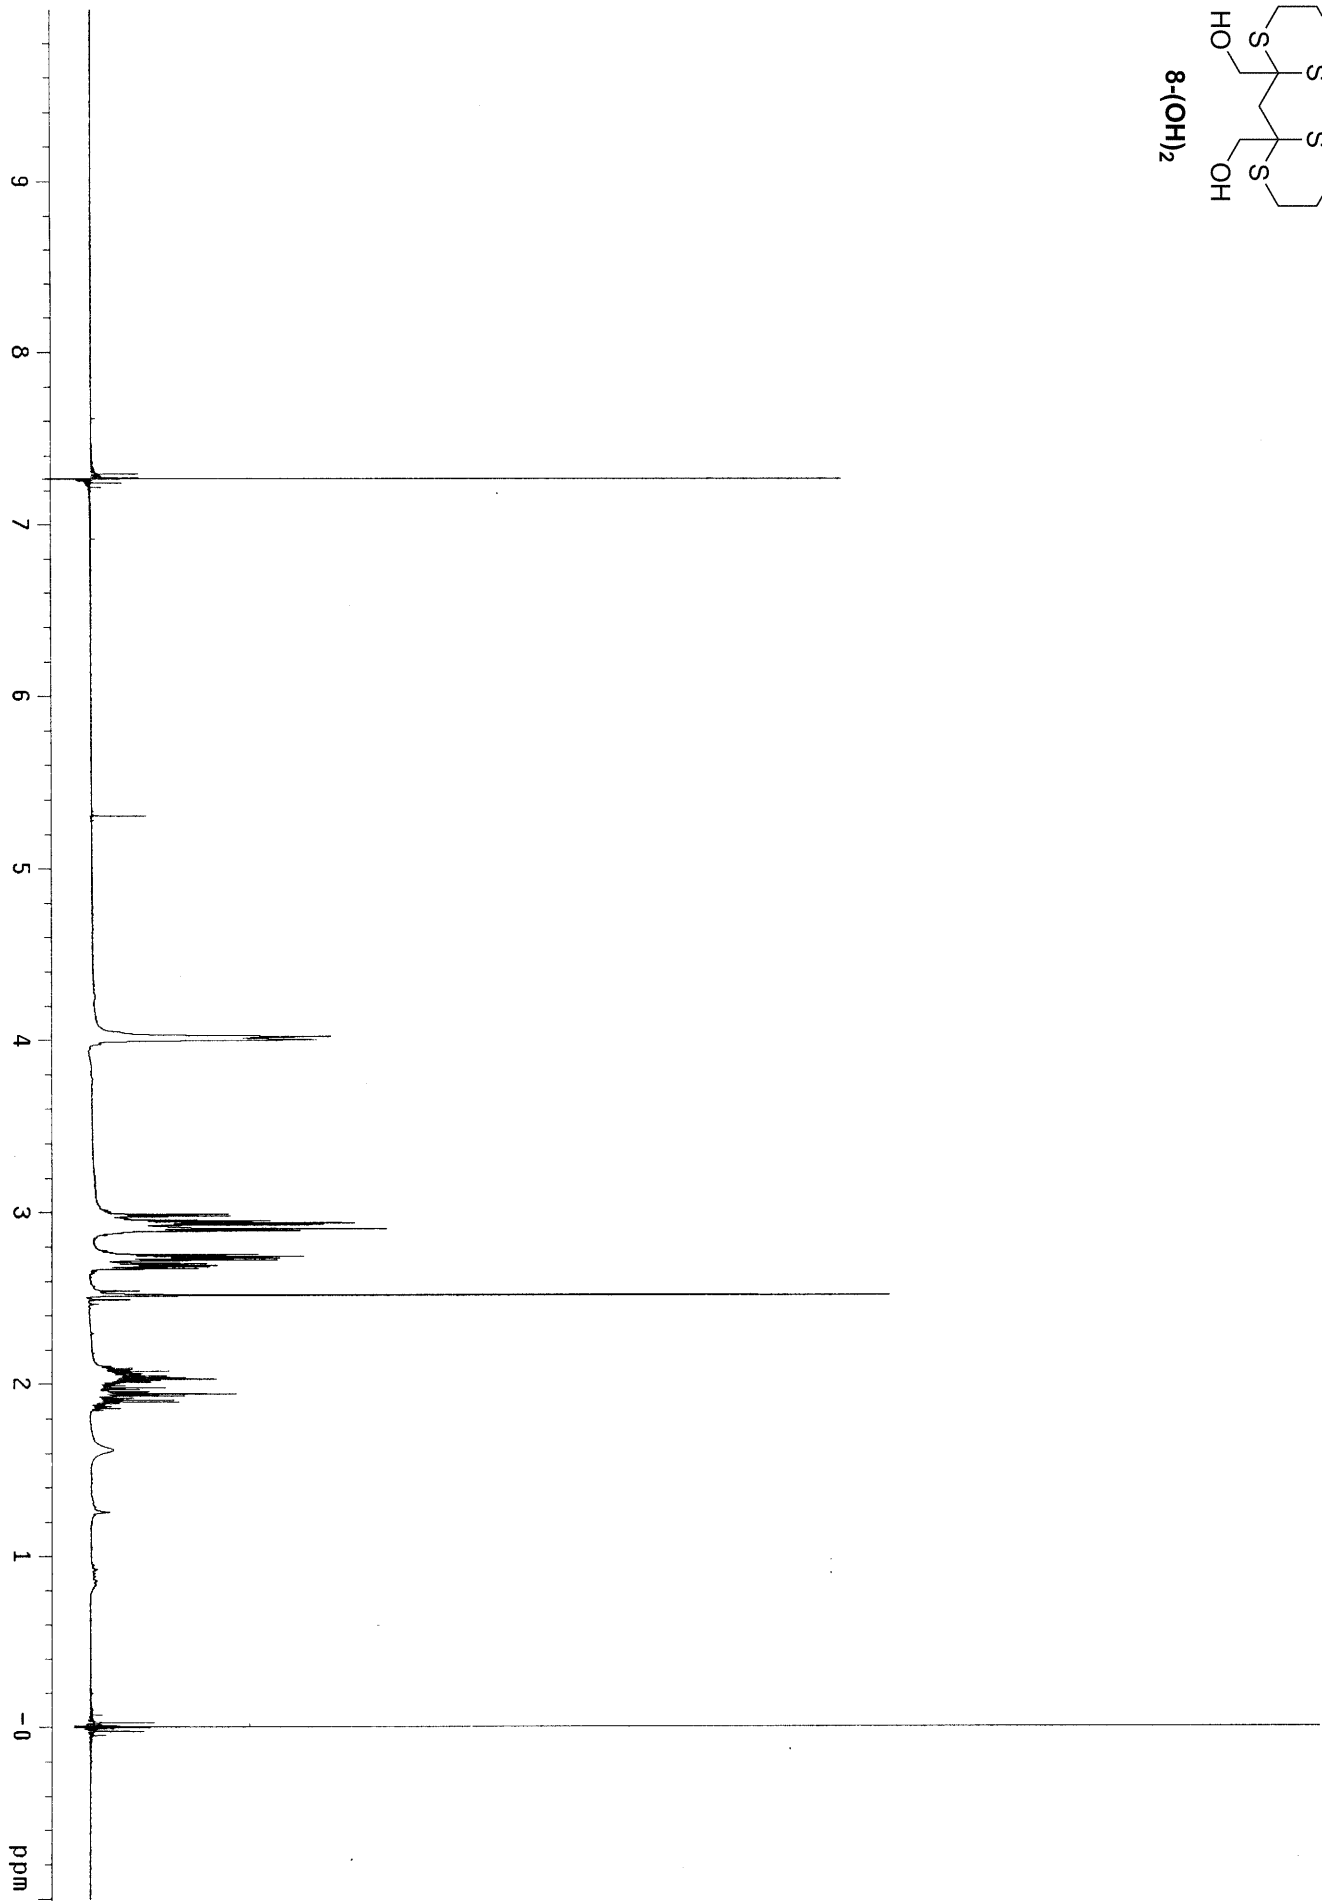

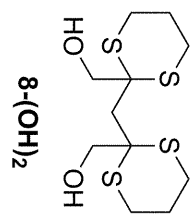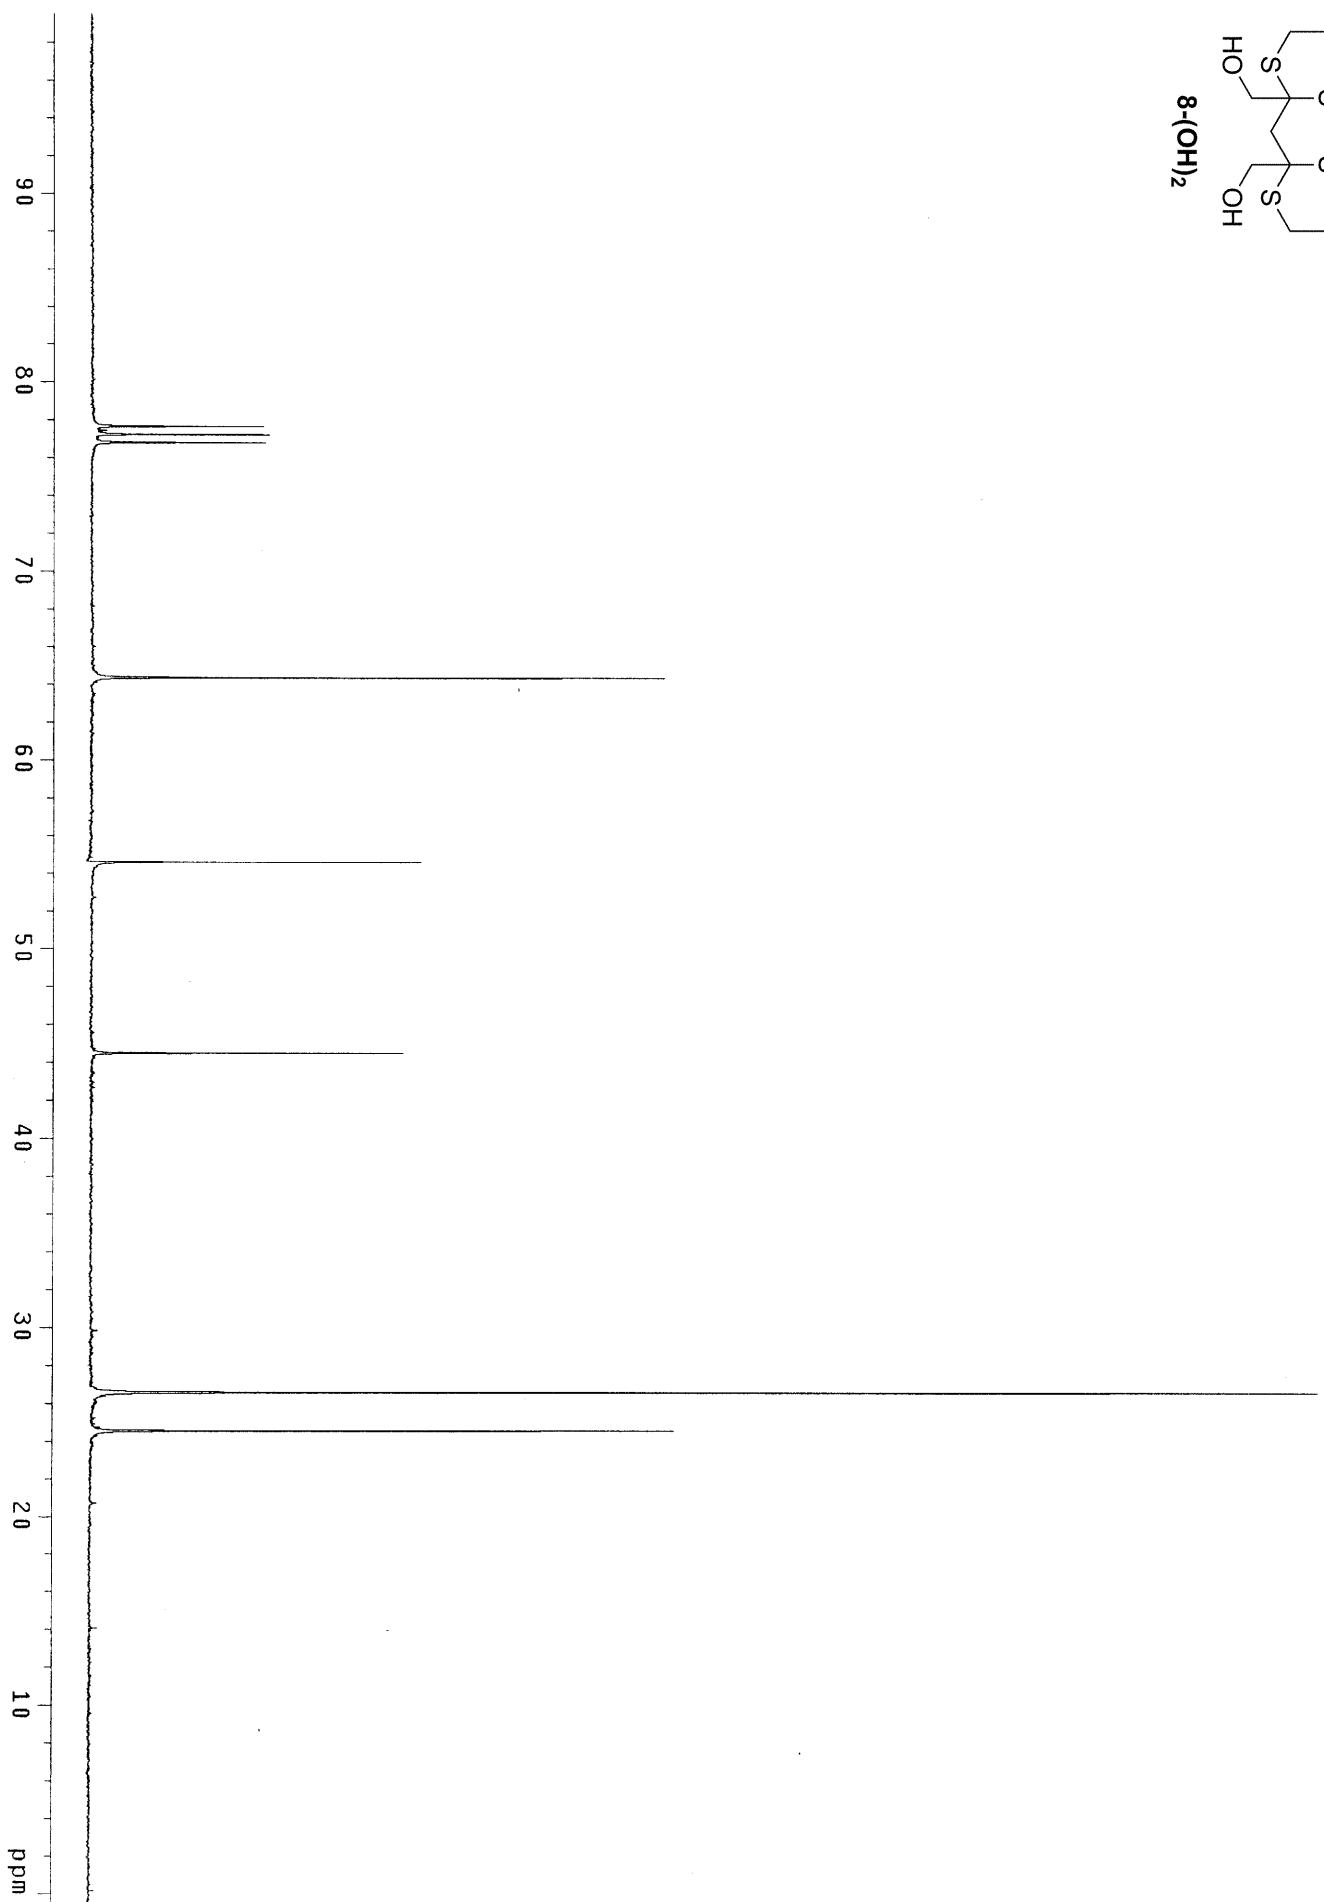

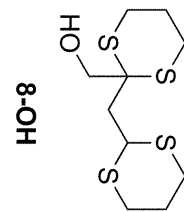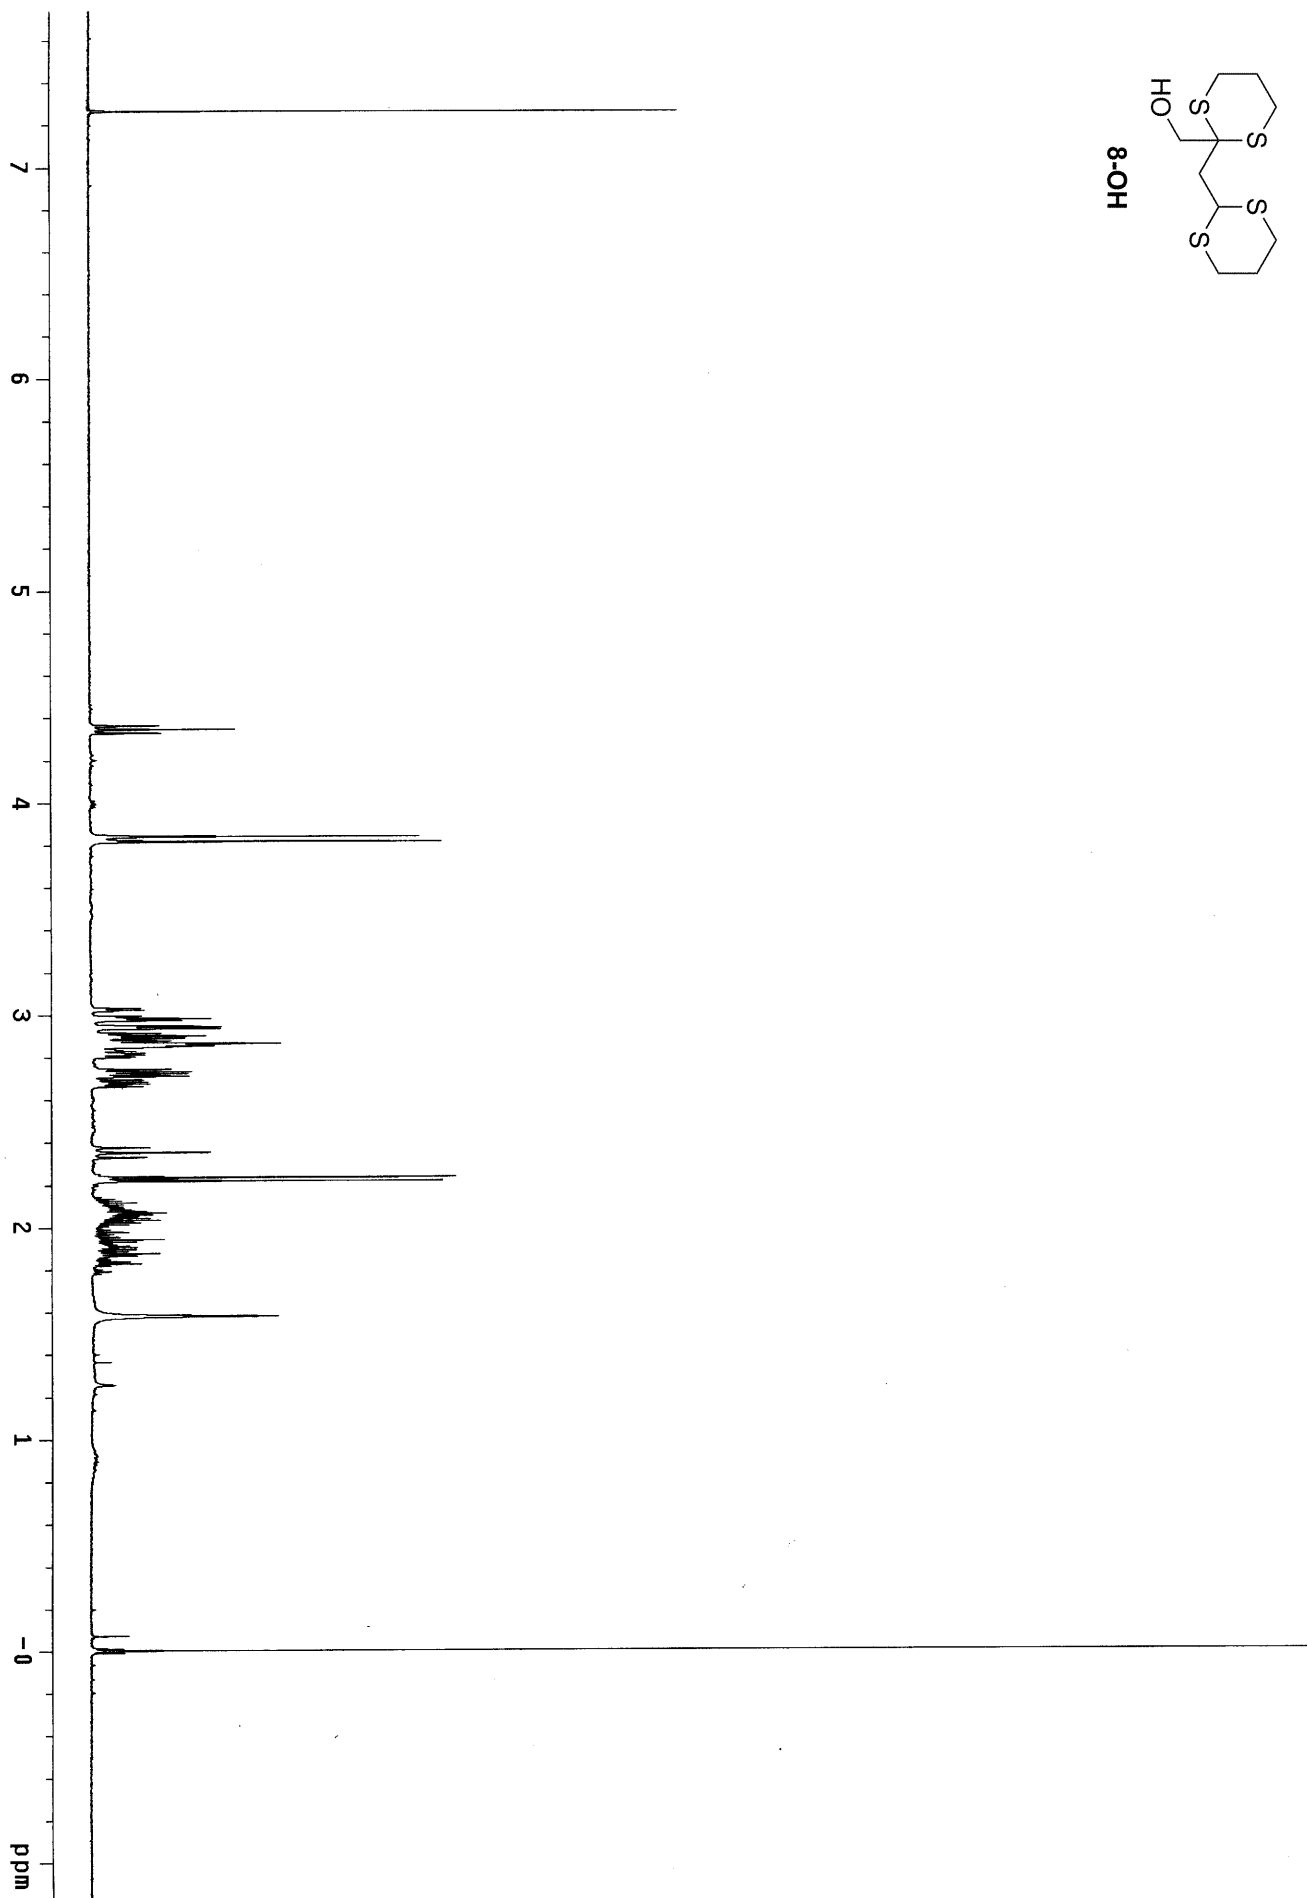



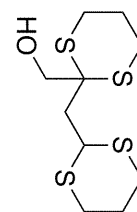

8-OH

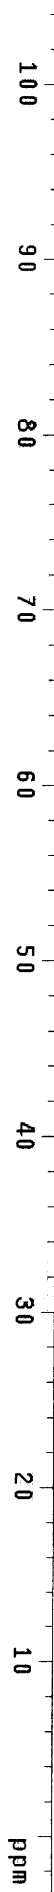

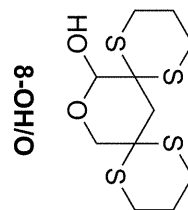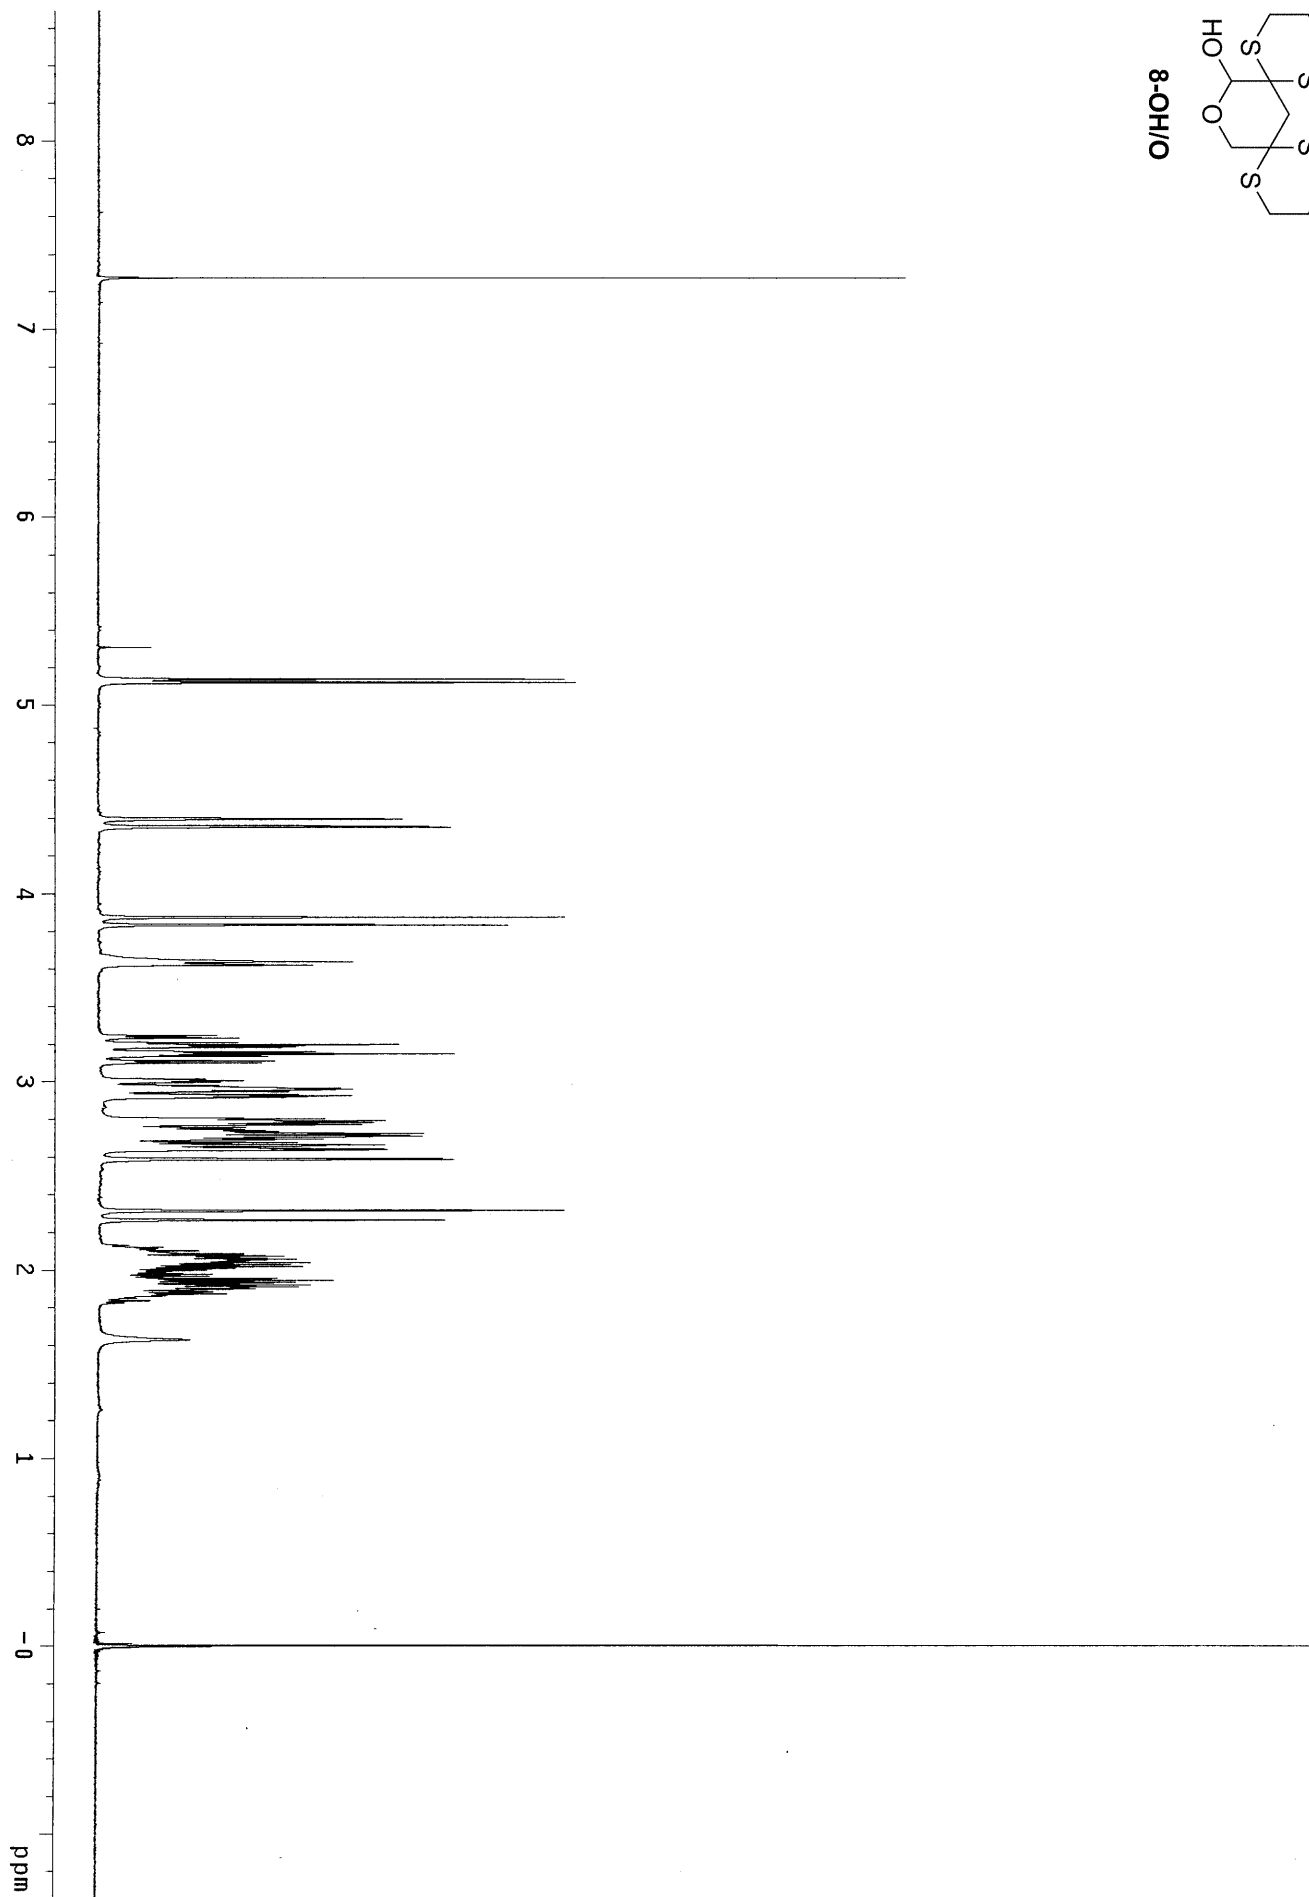

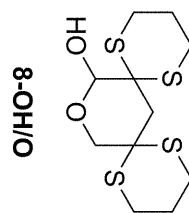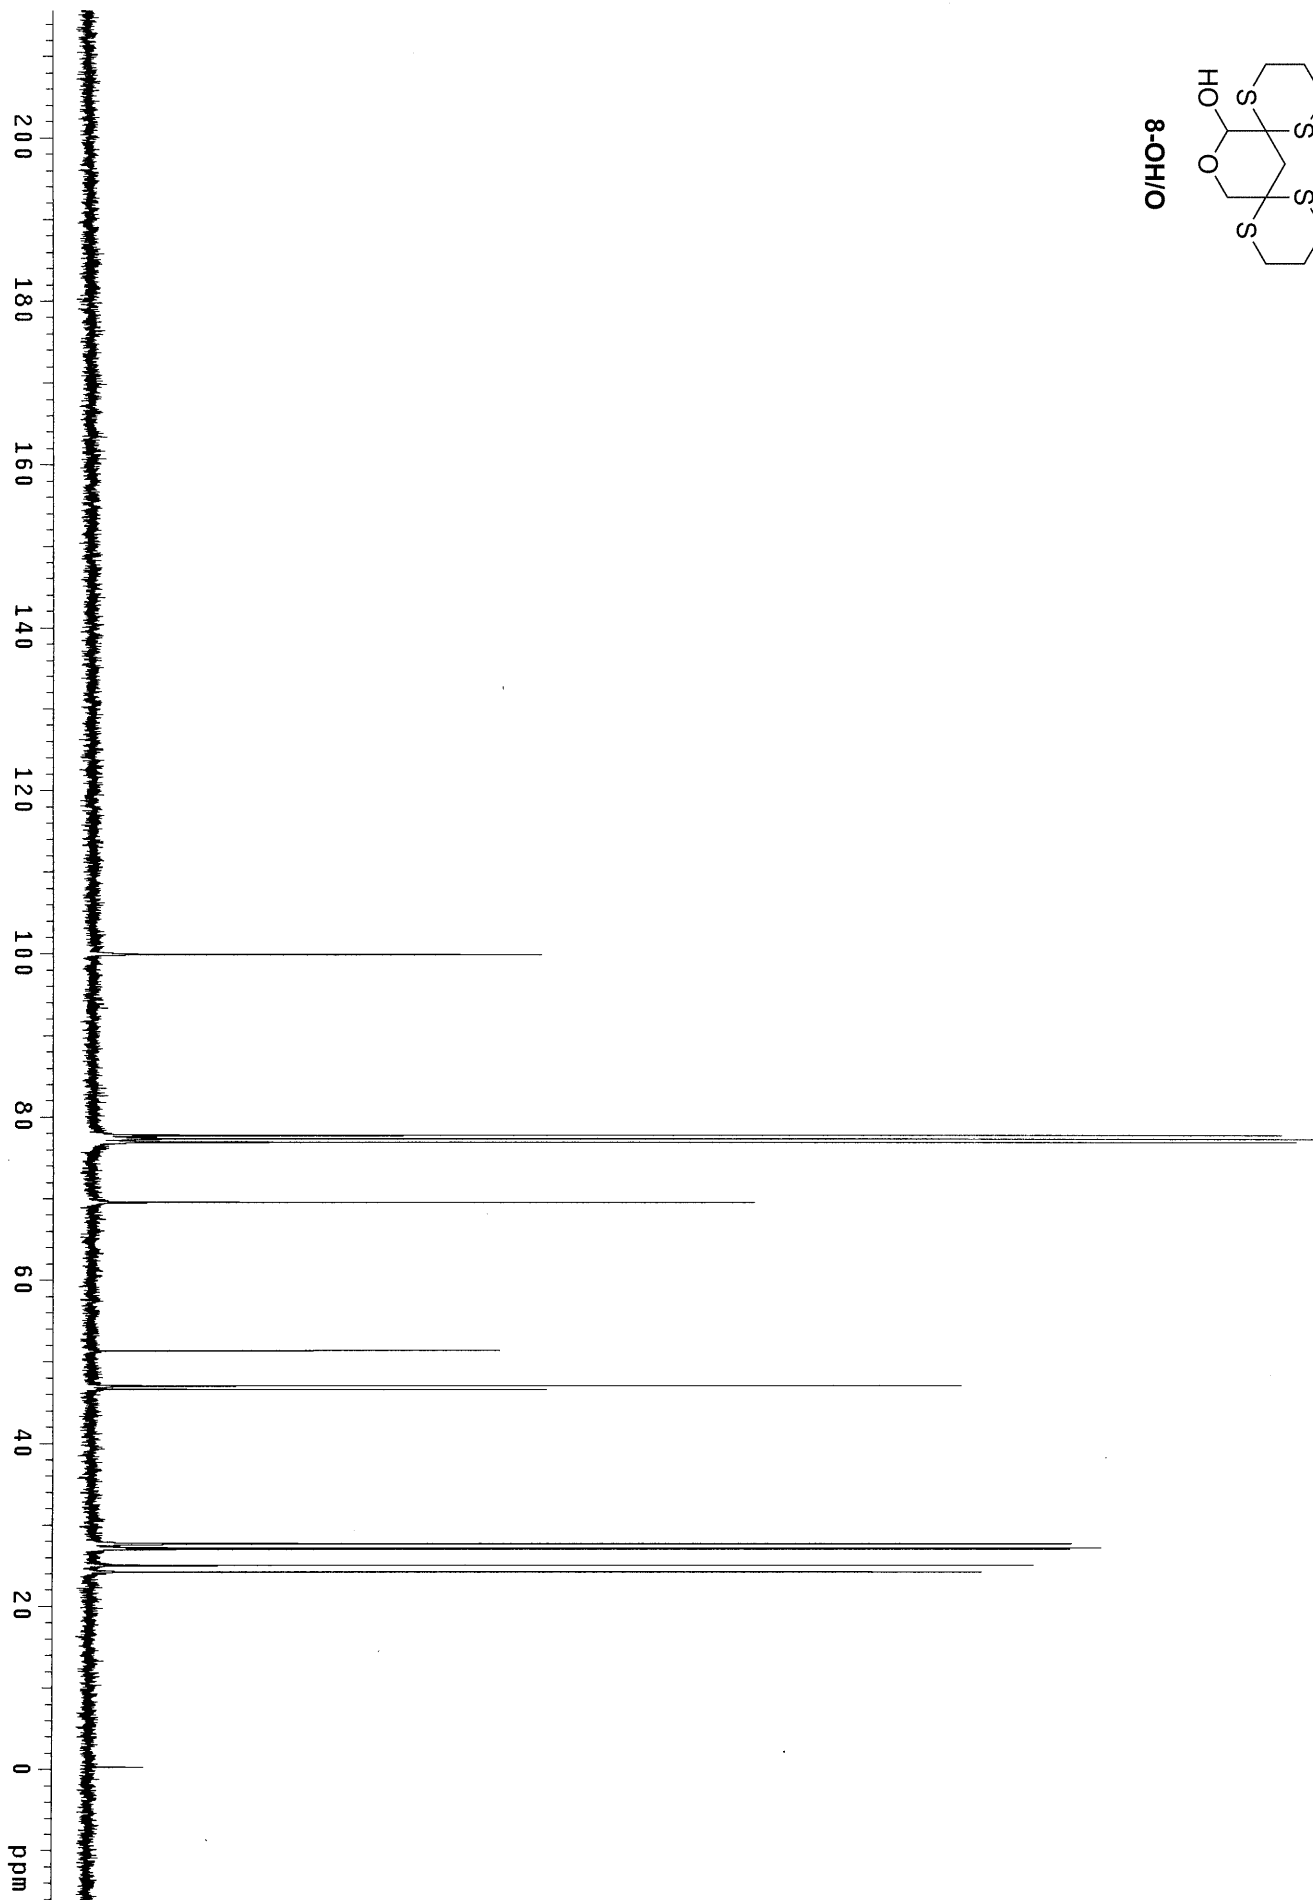

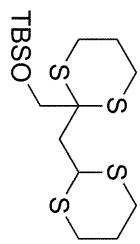

8-OTBS

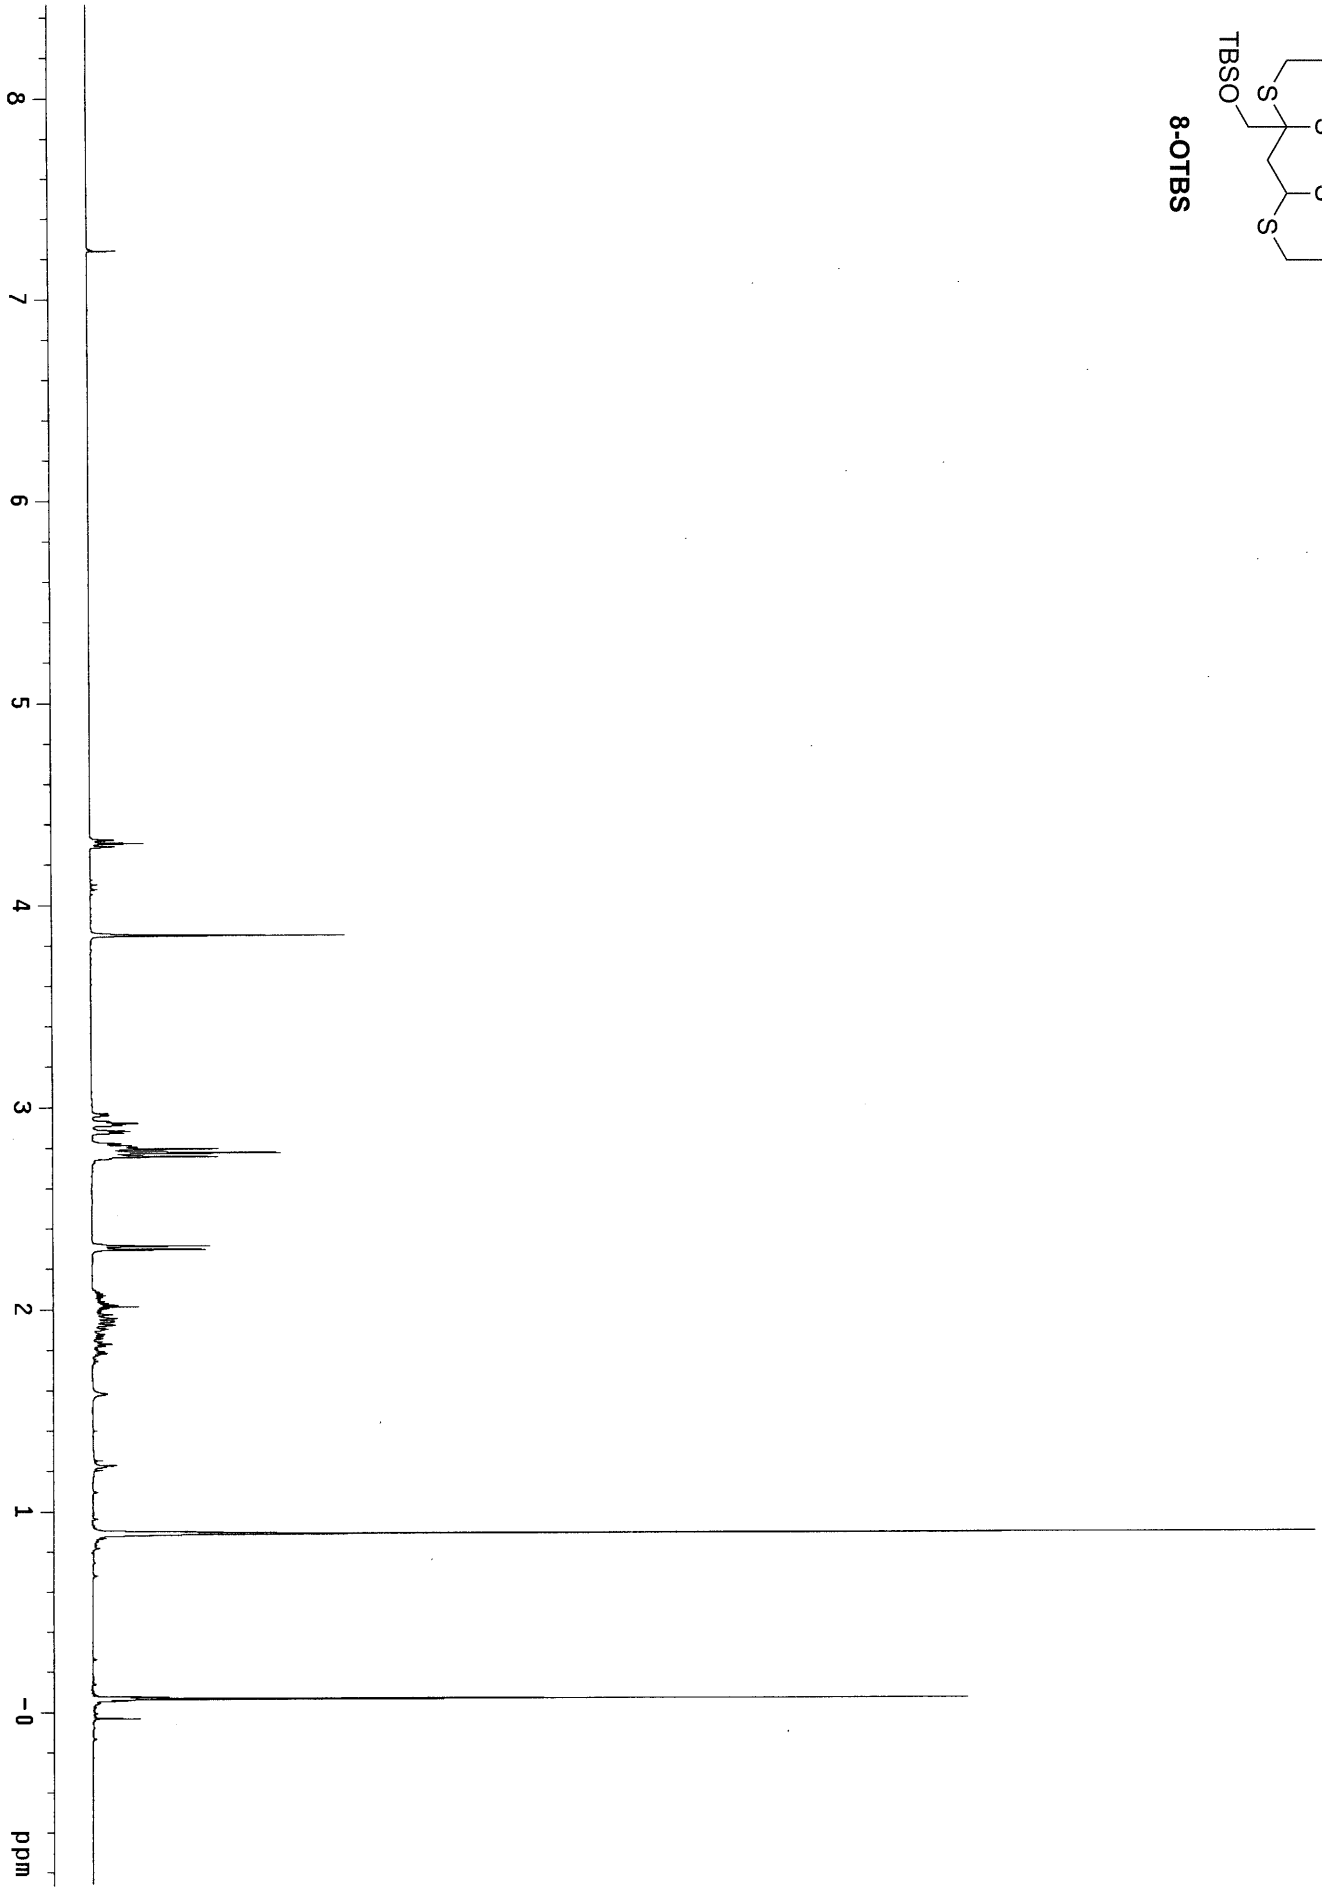

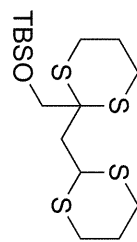

8-OTBS

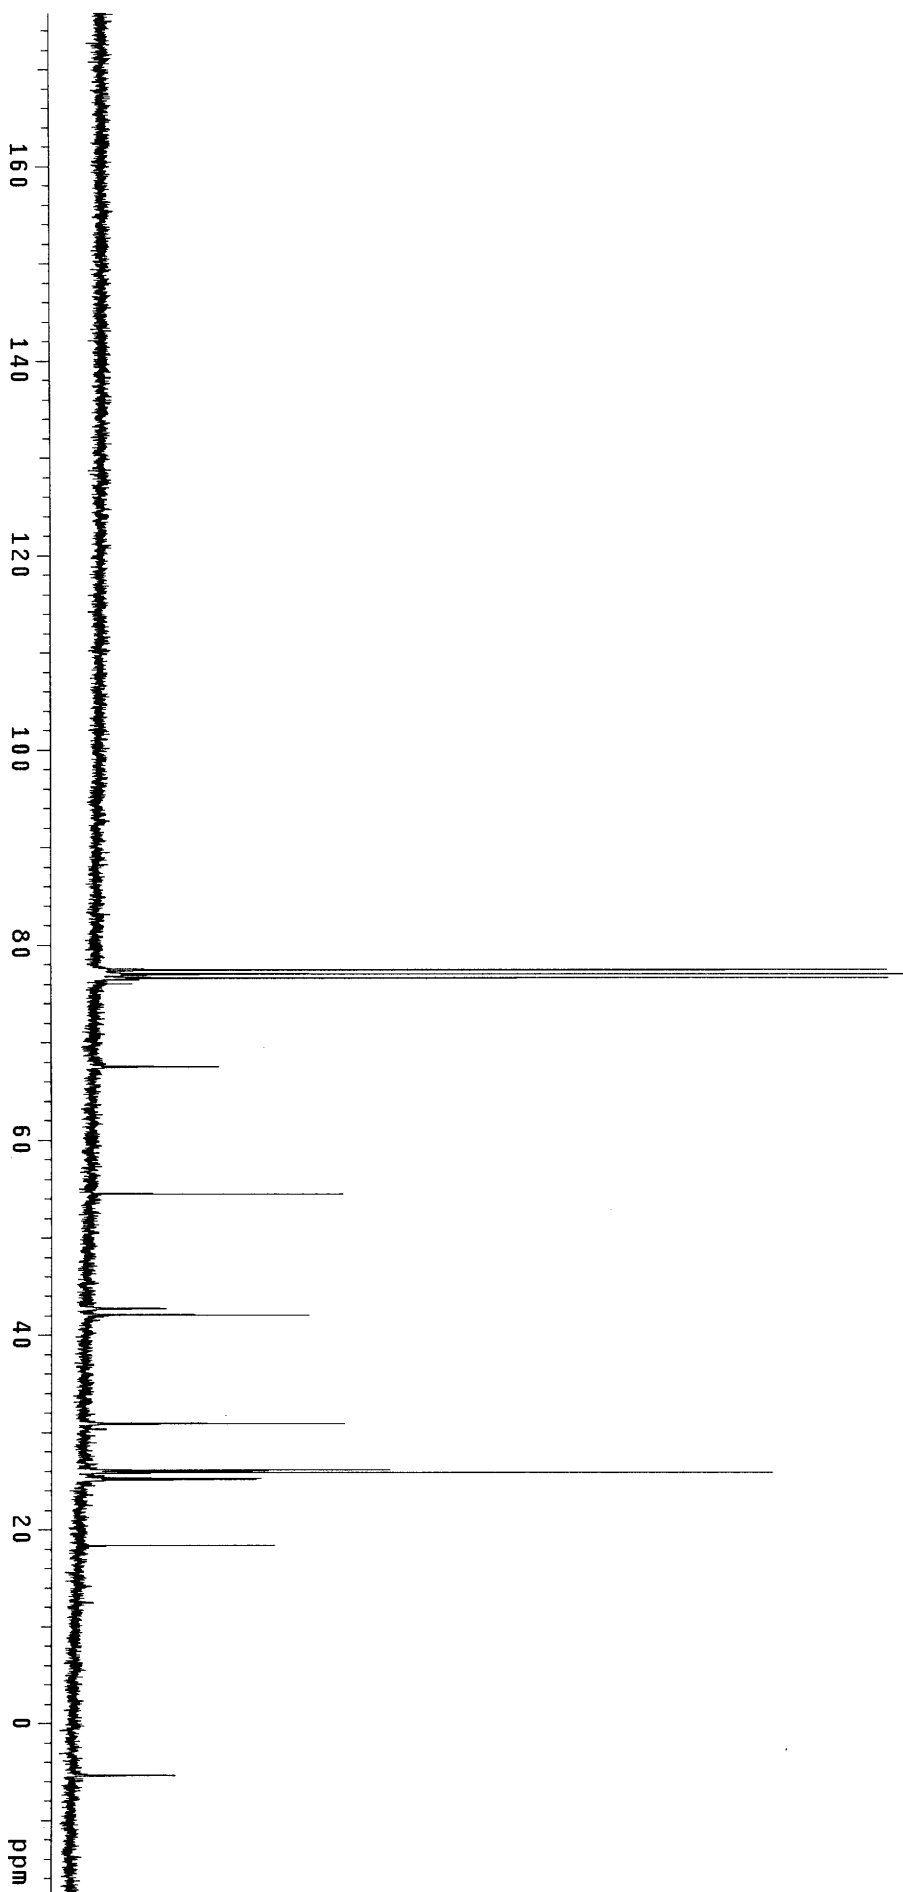

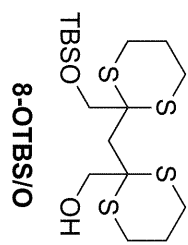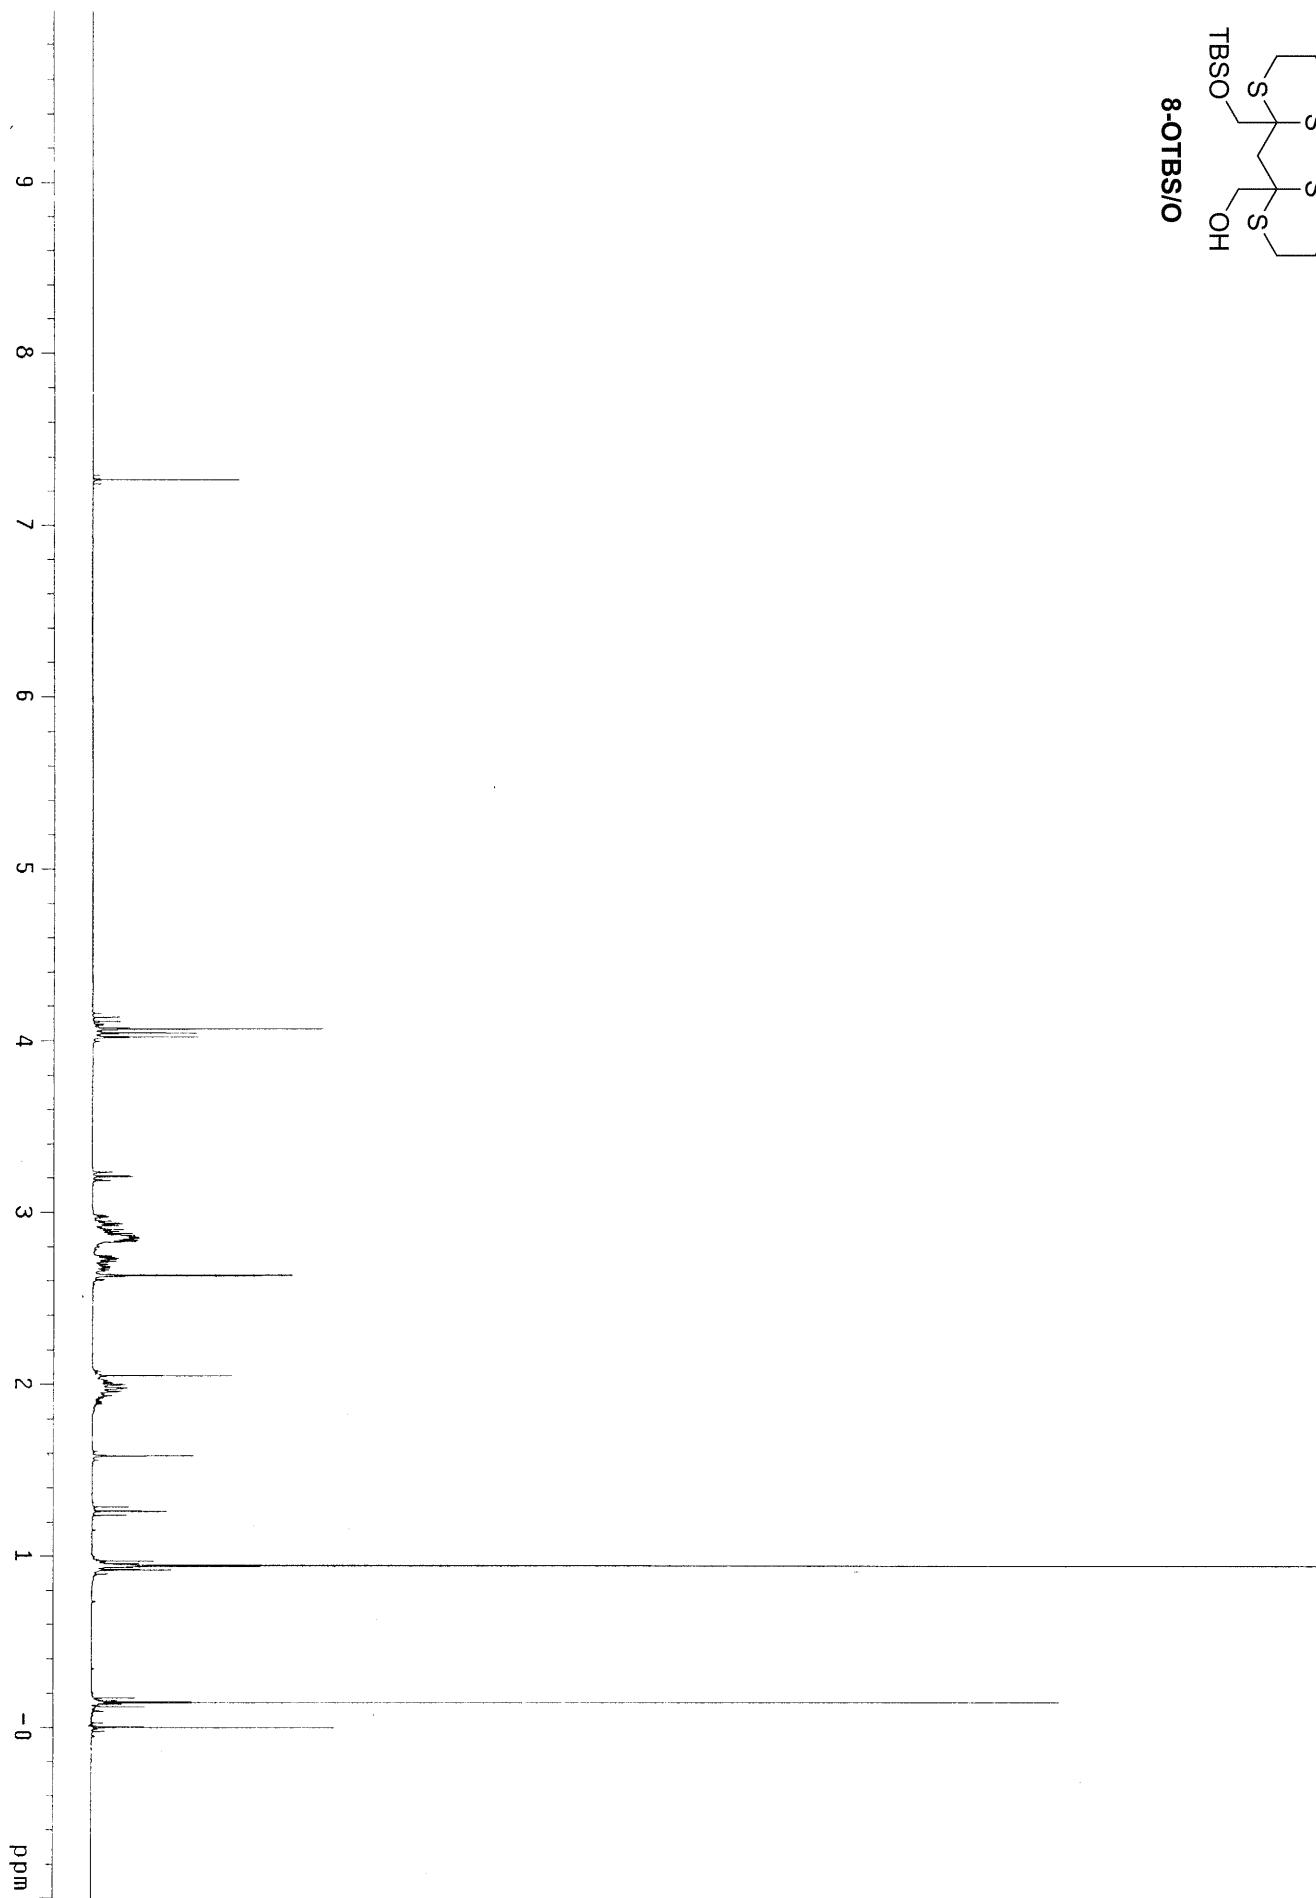

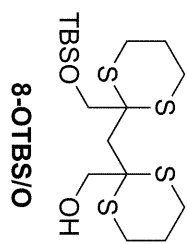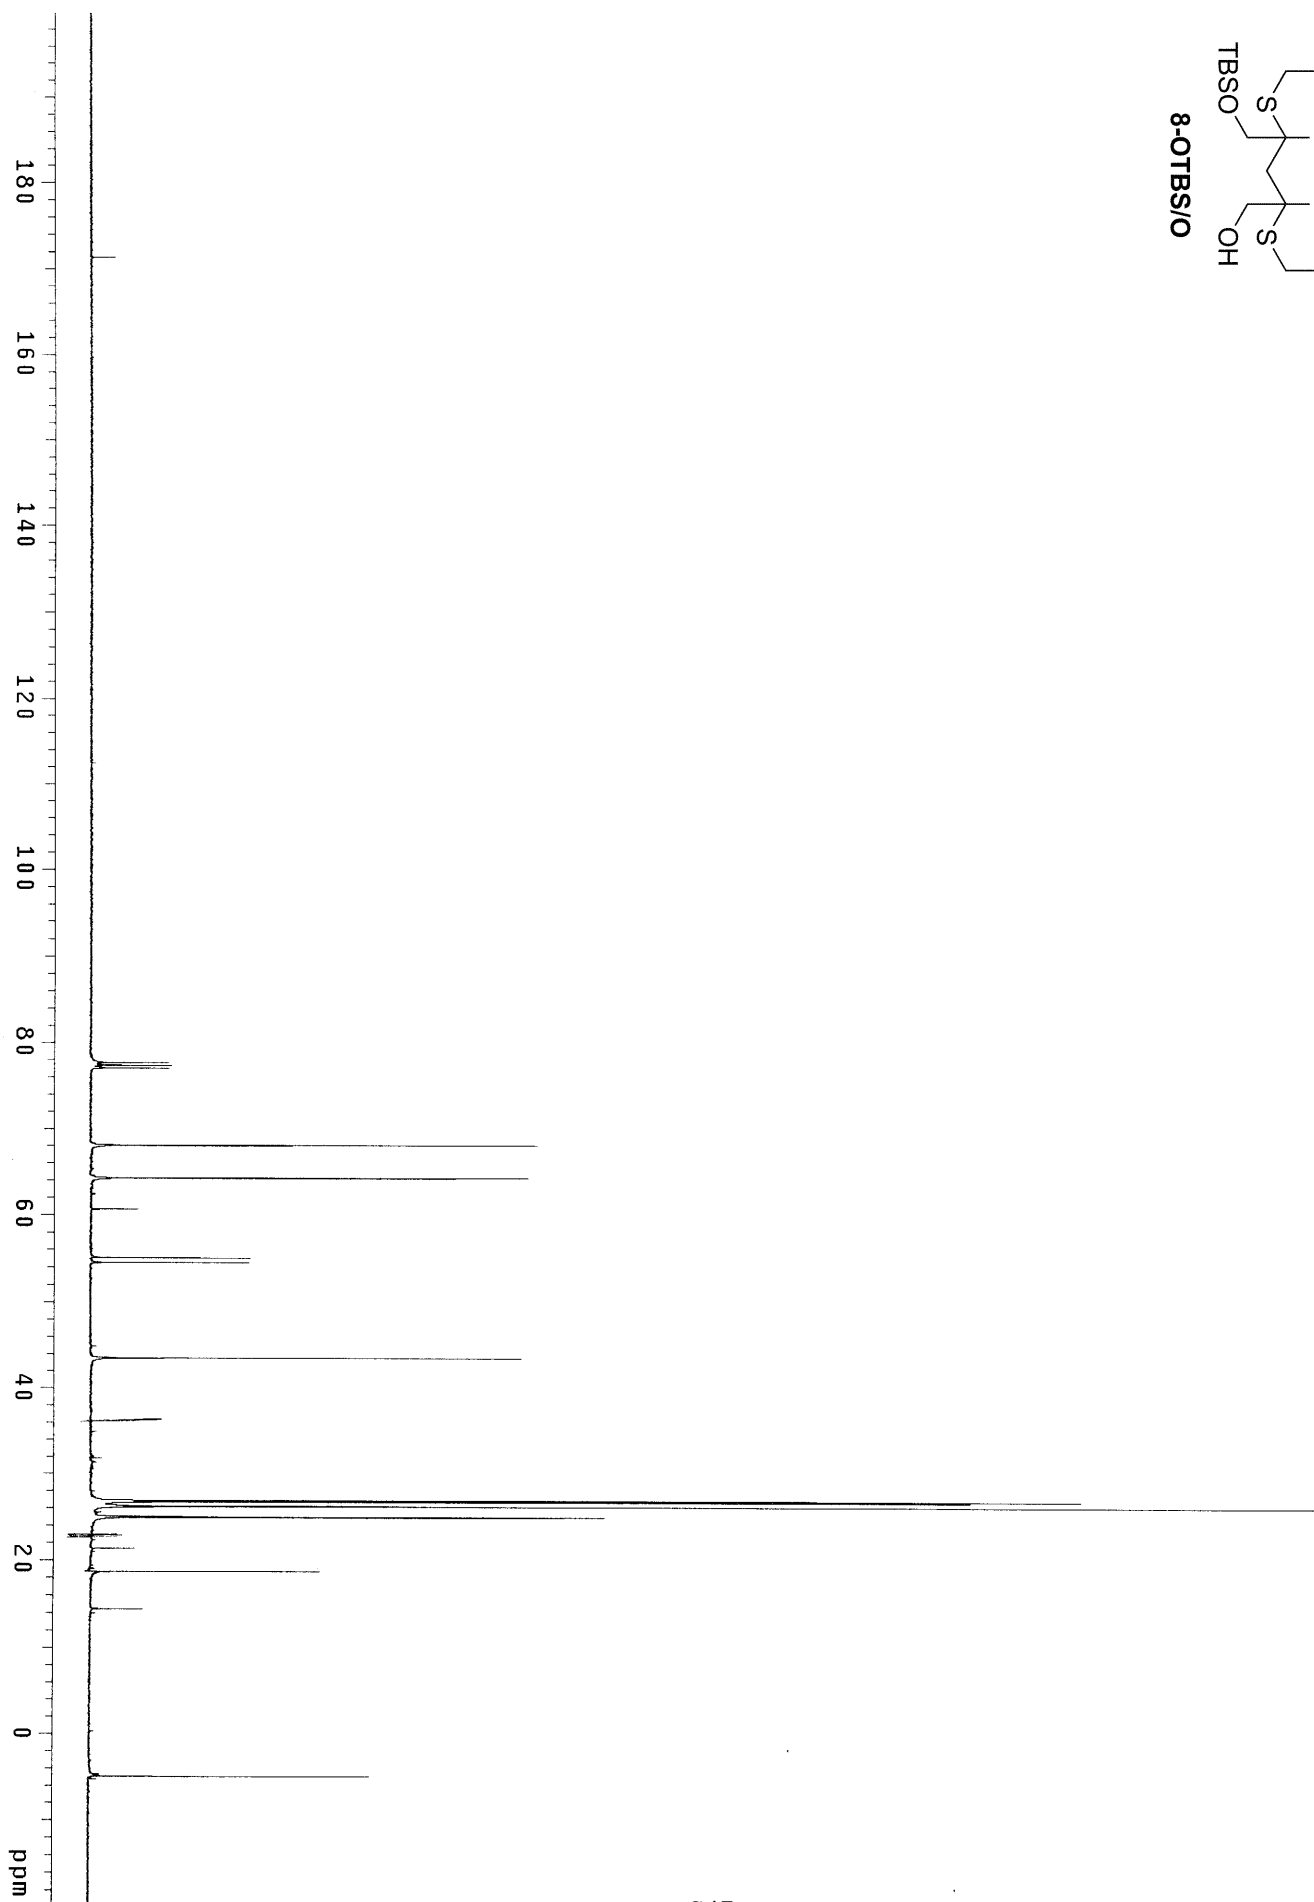

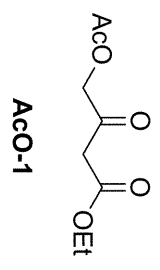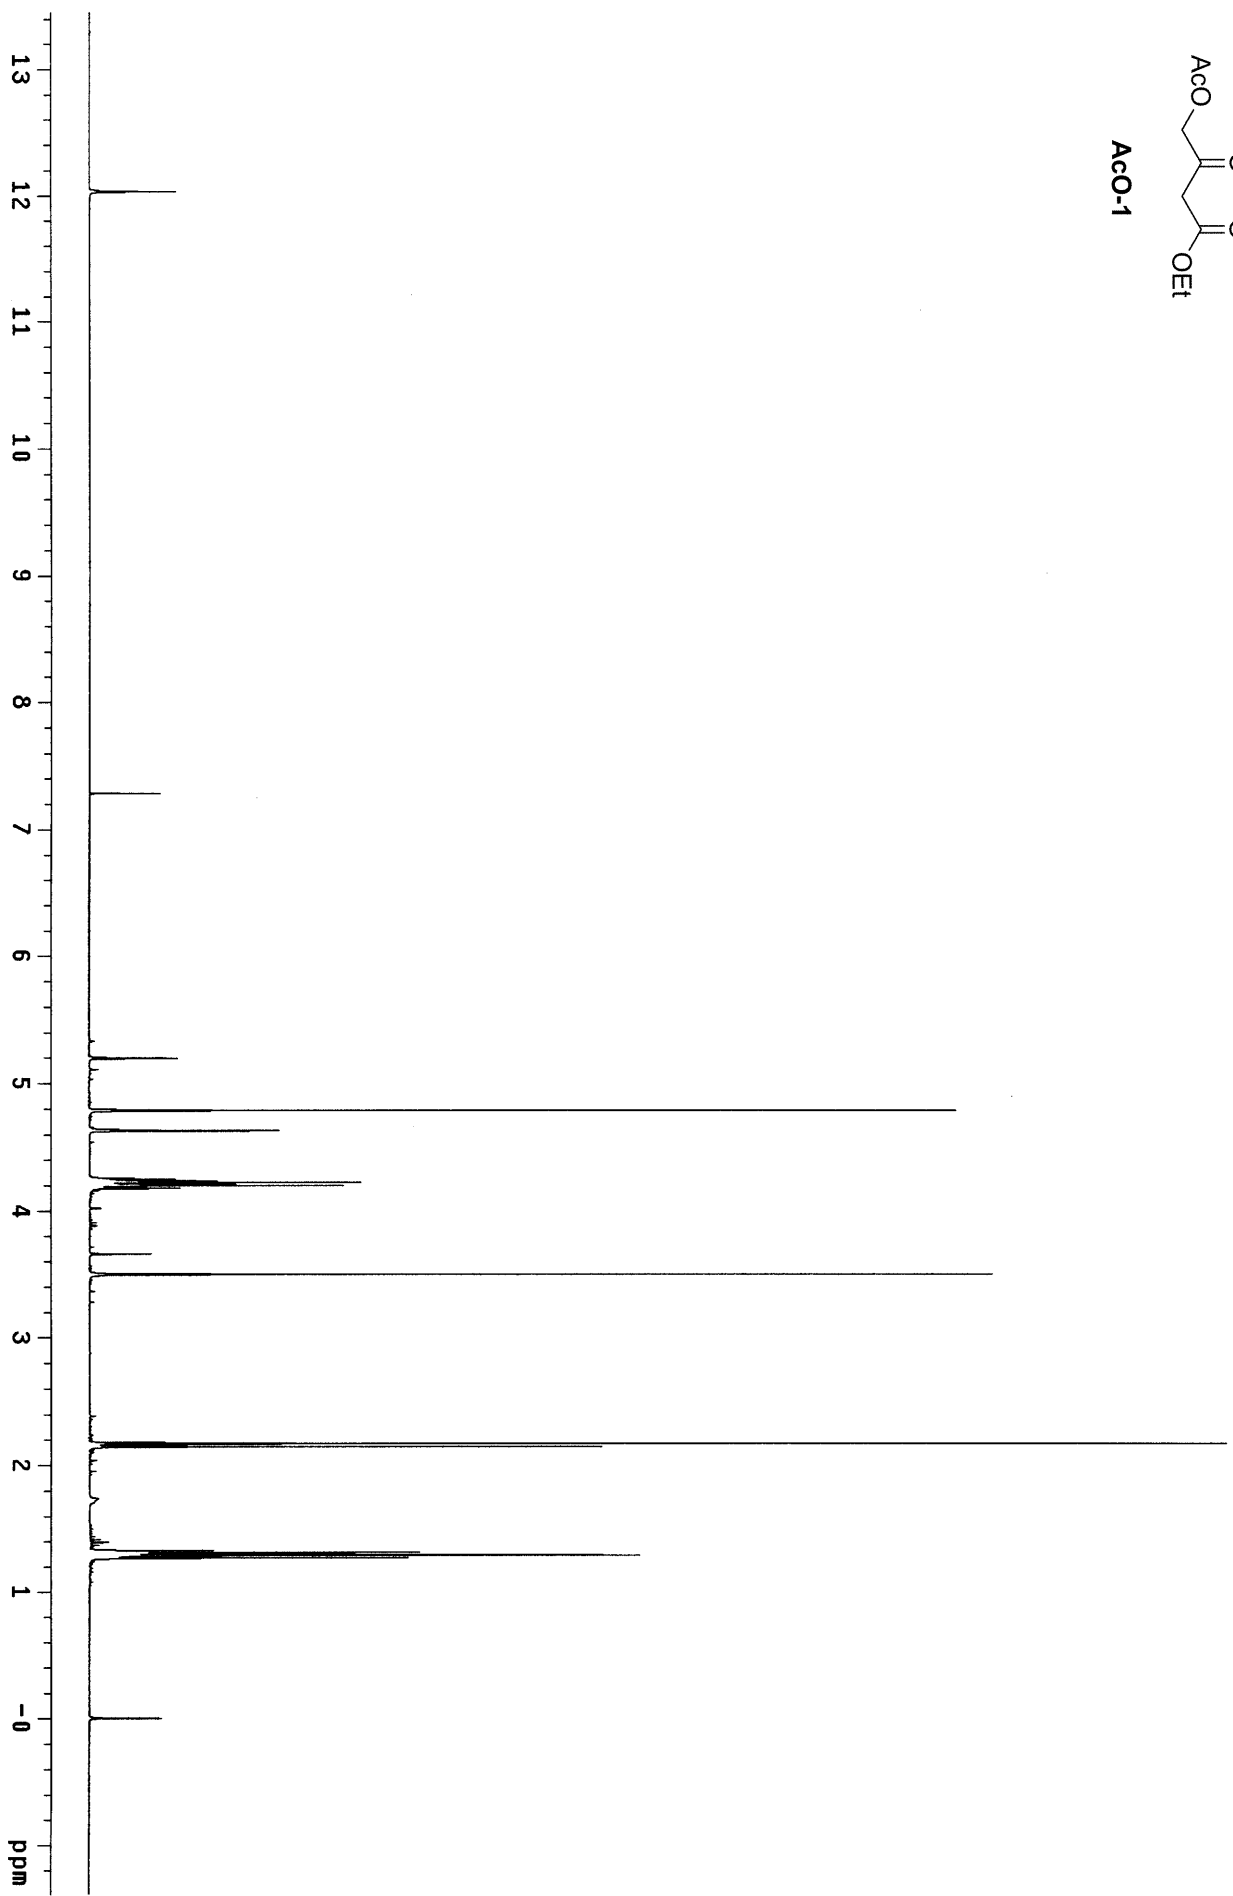



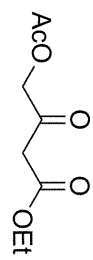

AcO-1

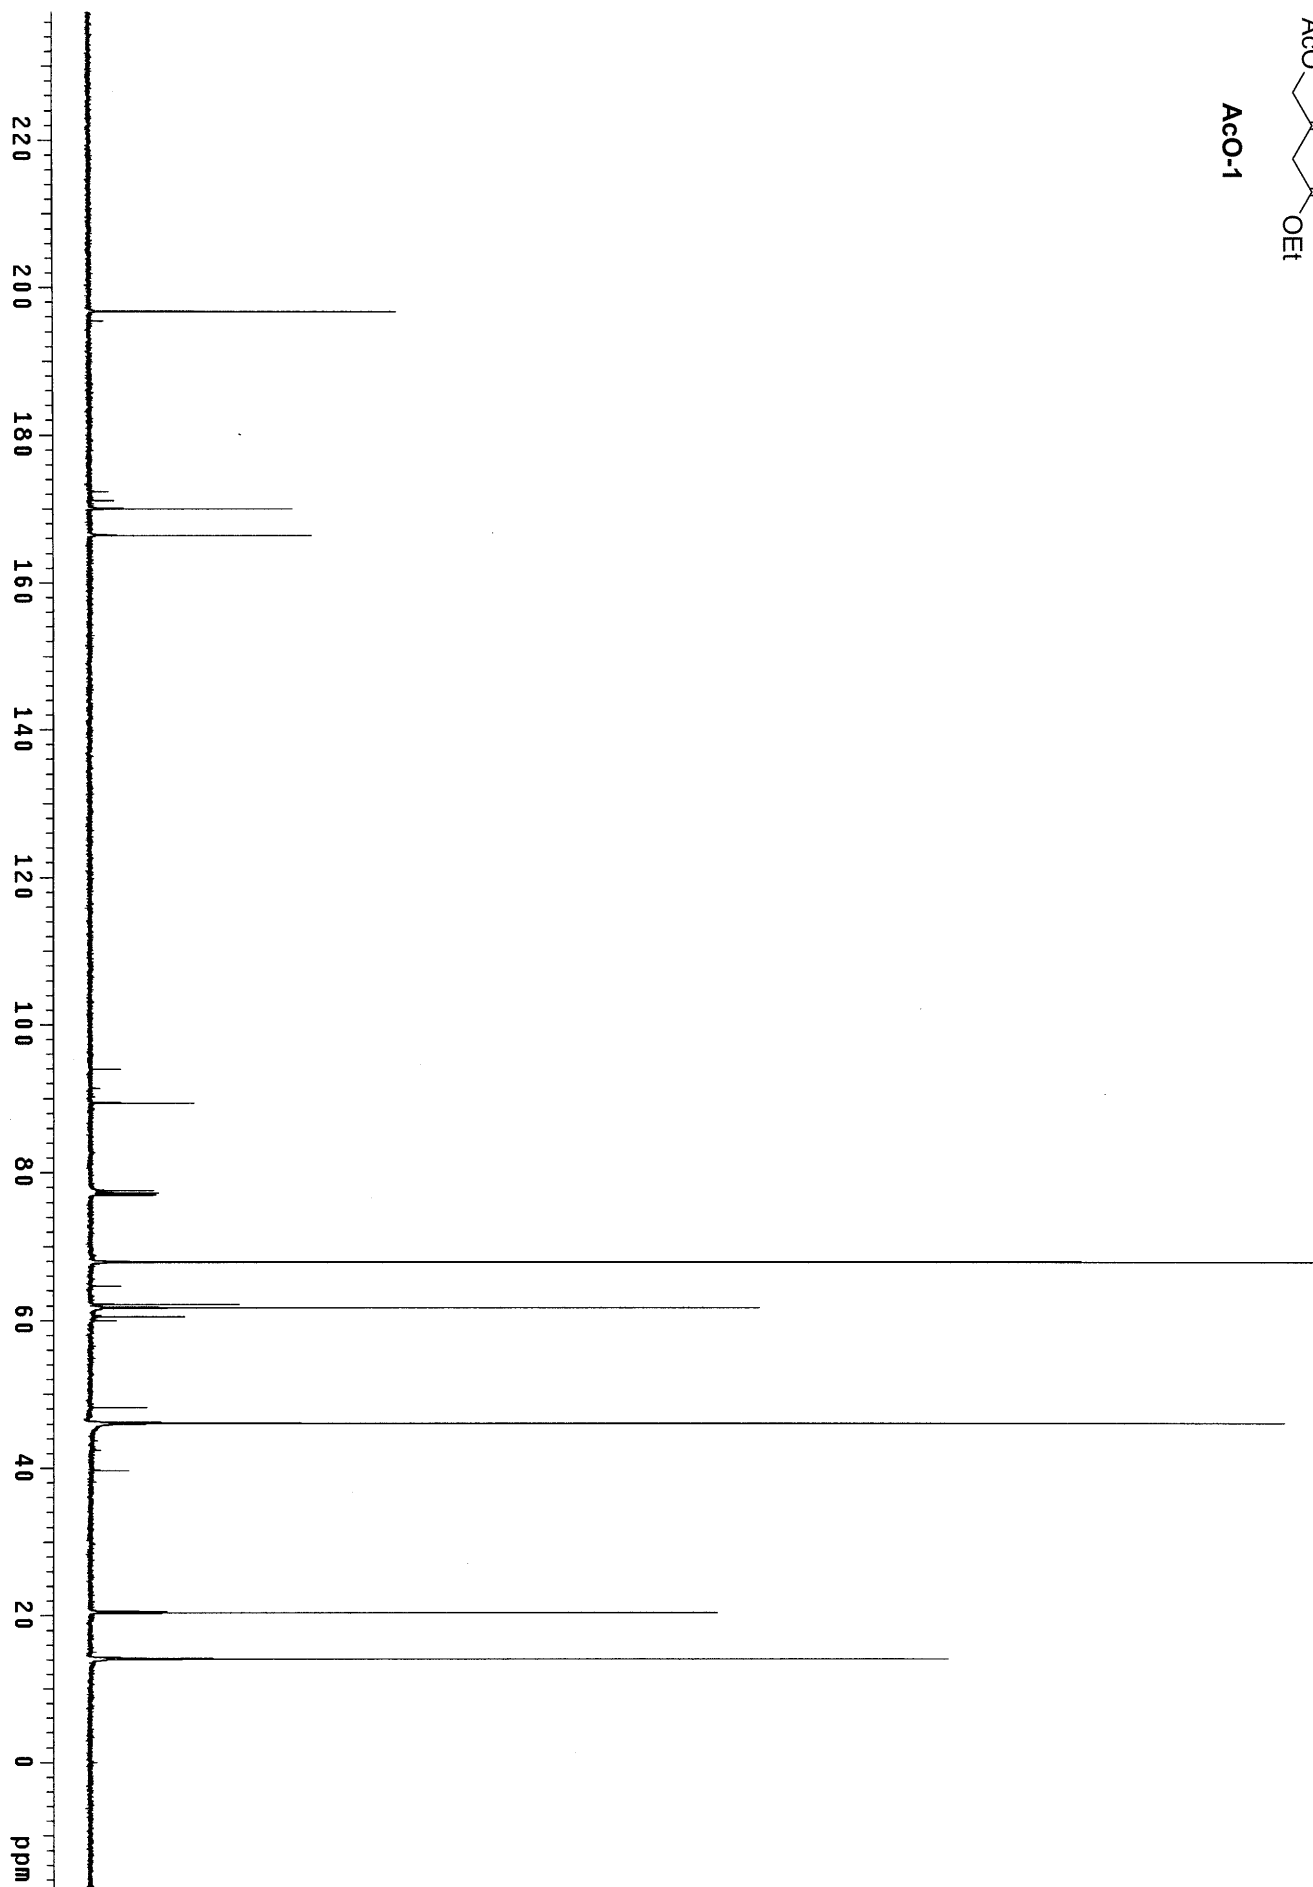

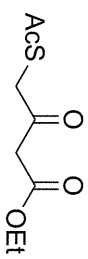

AcS-1

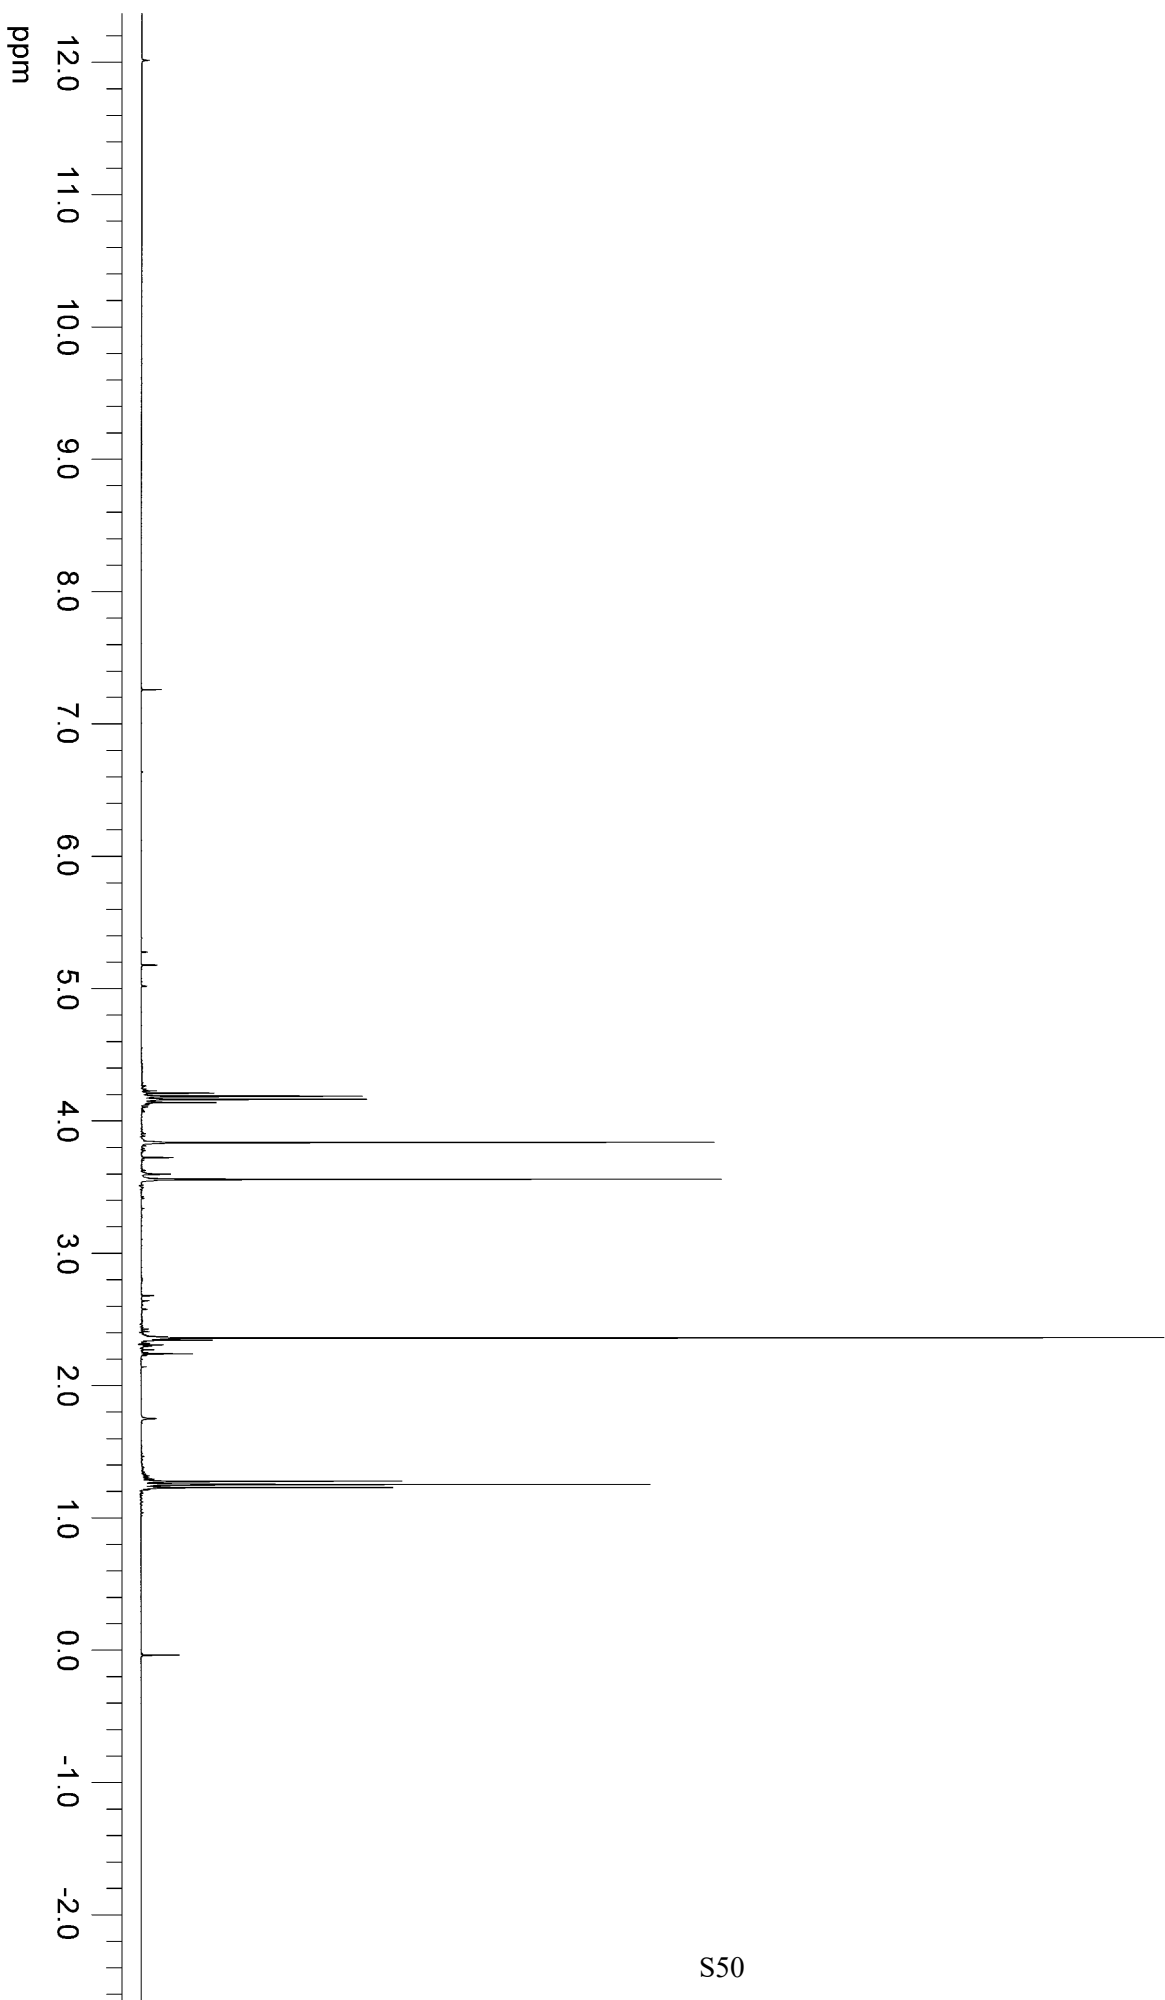

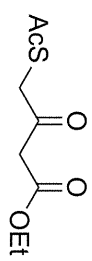

ACS-1

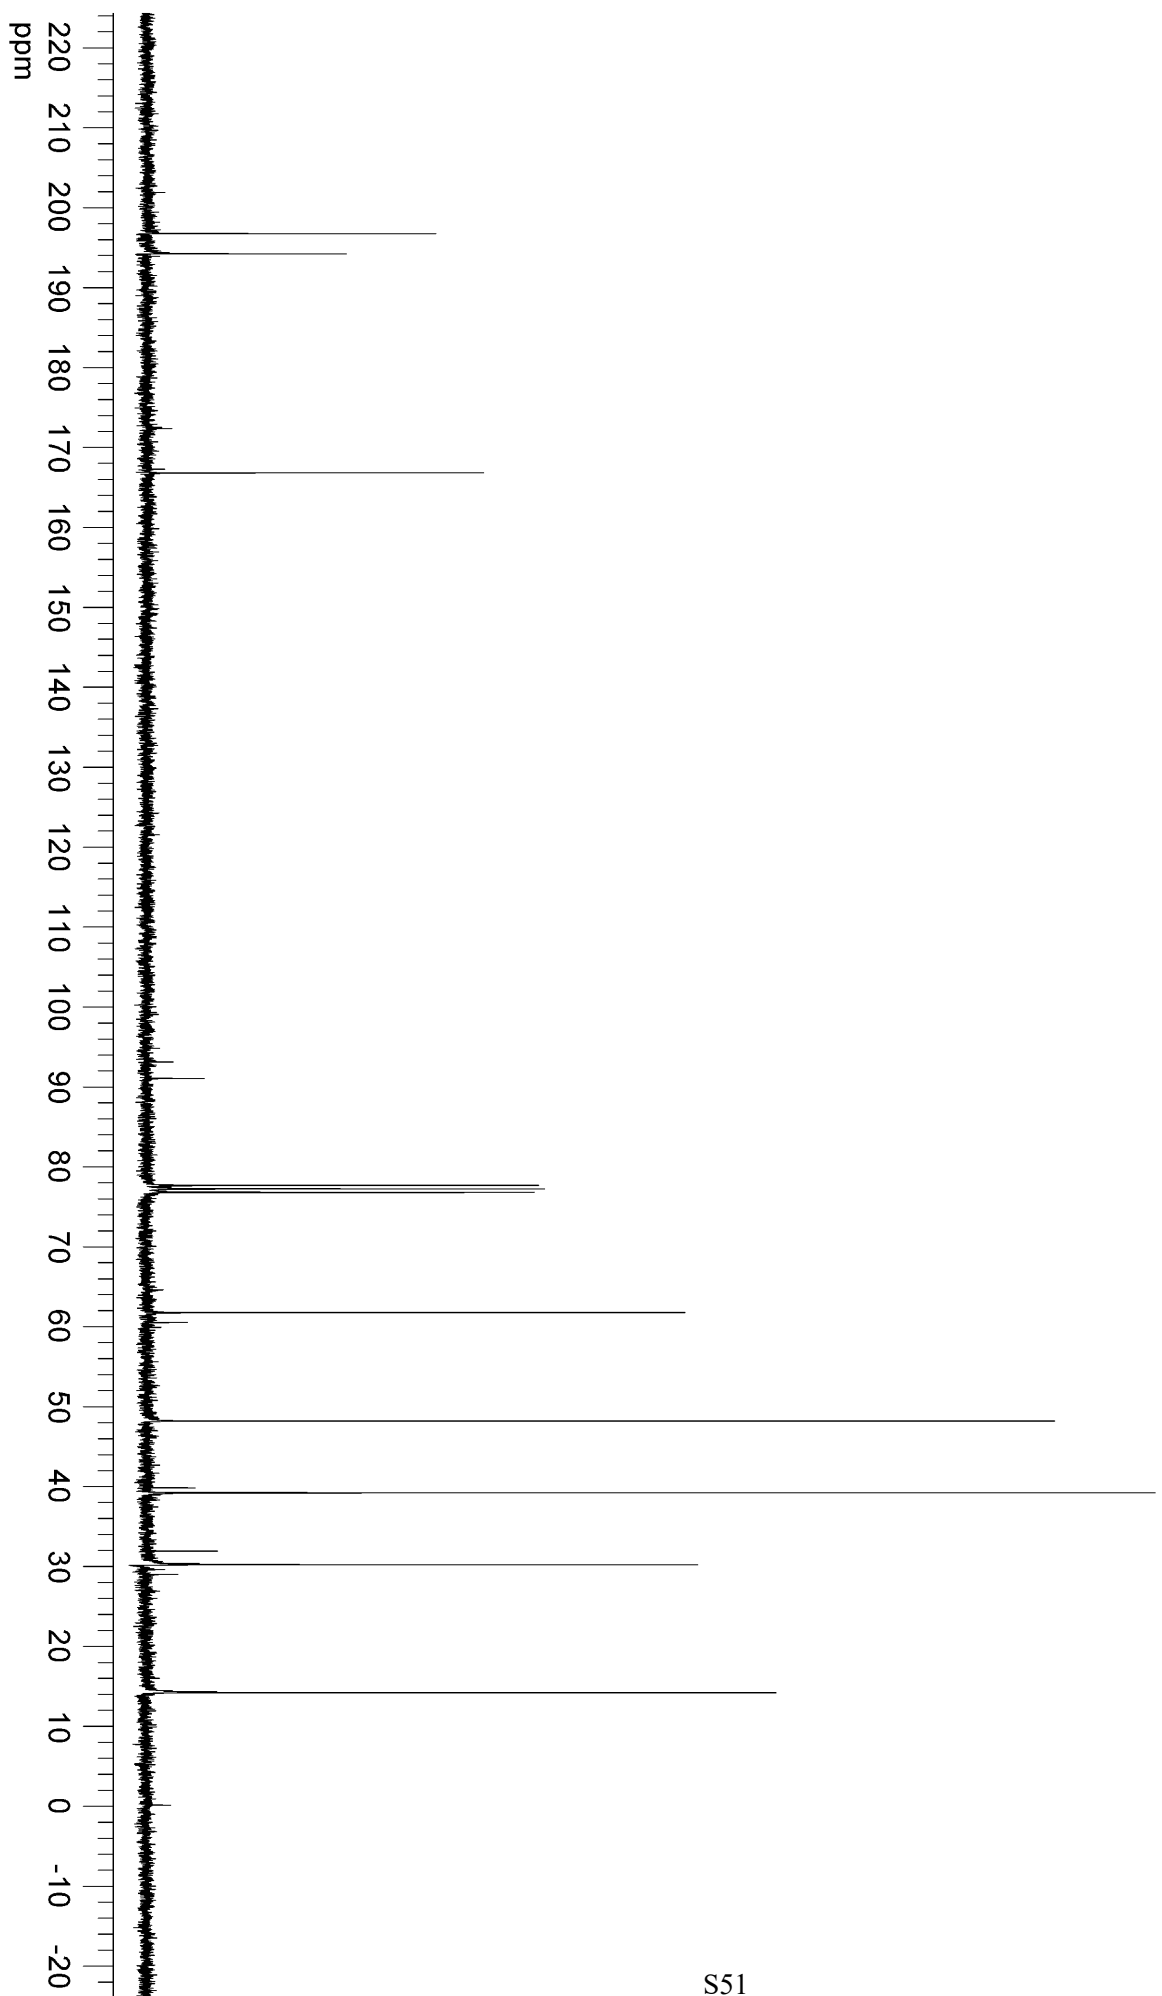

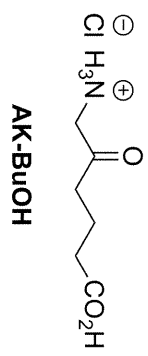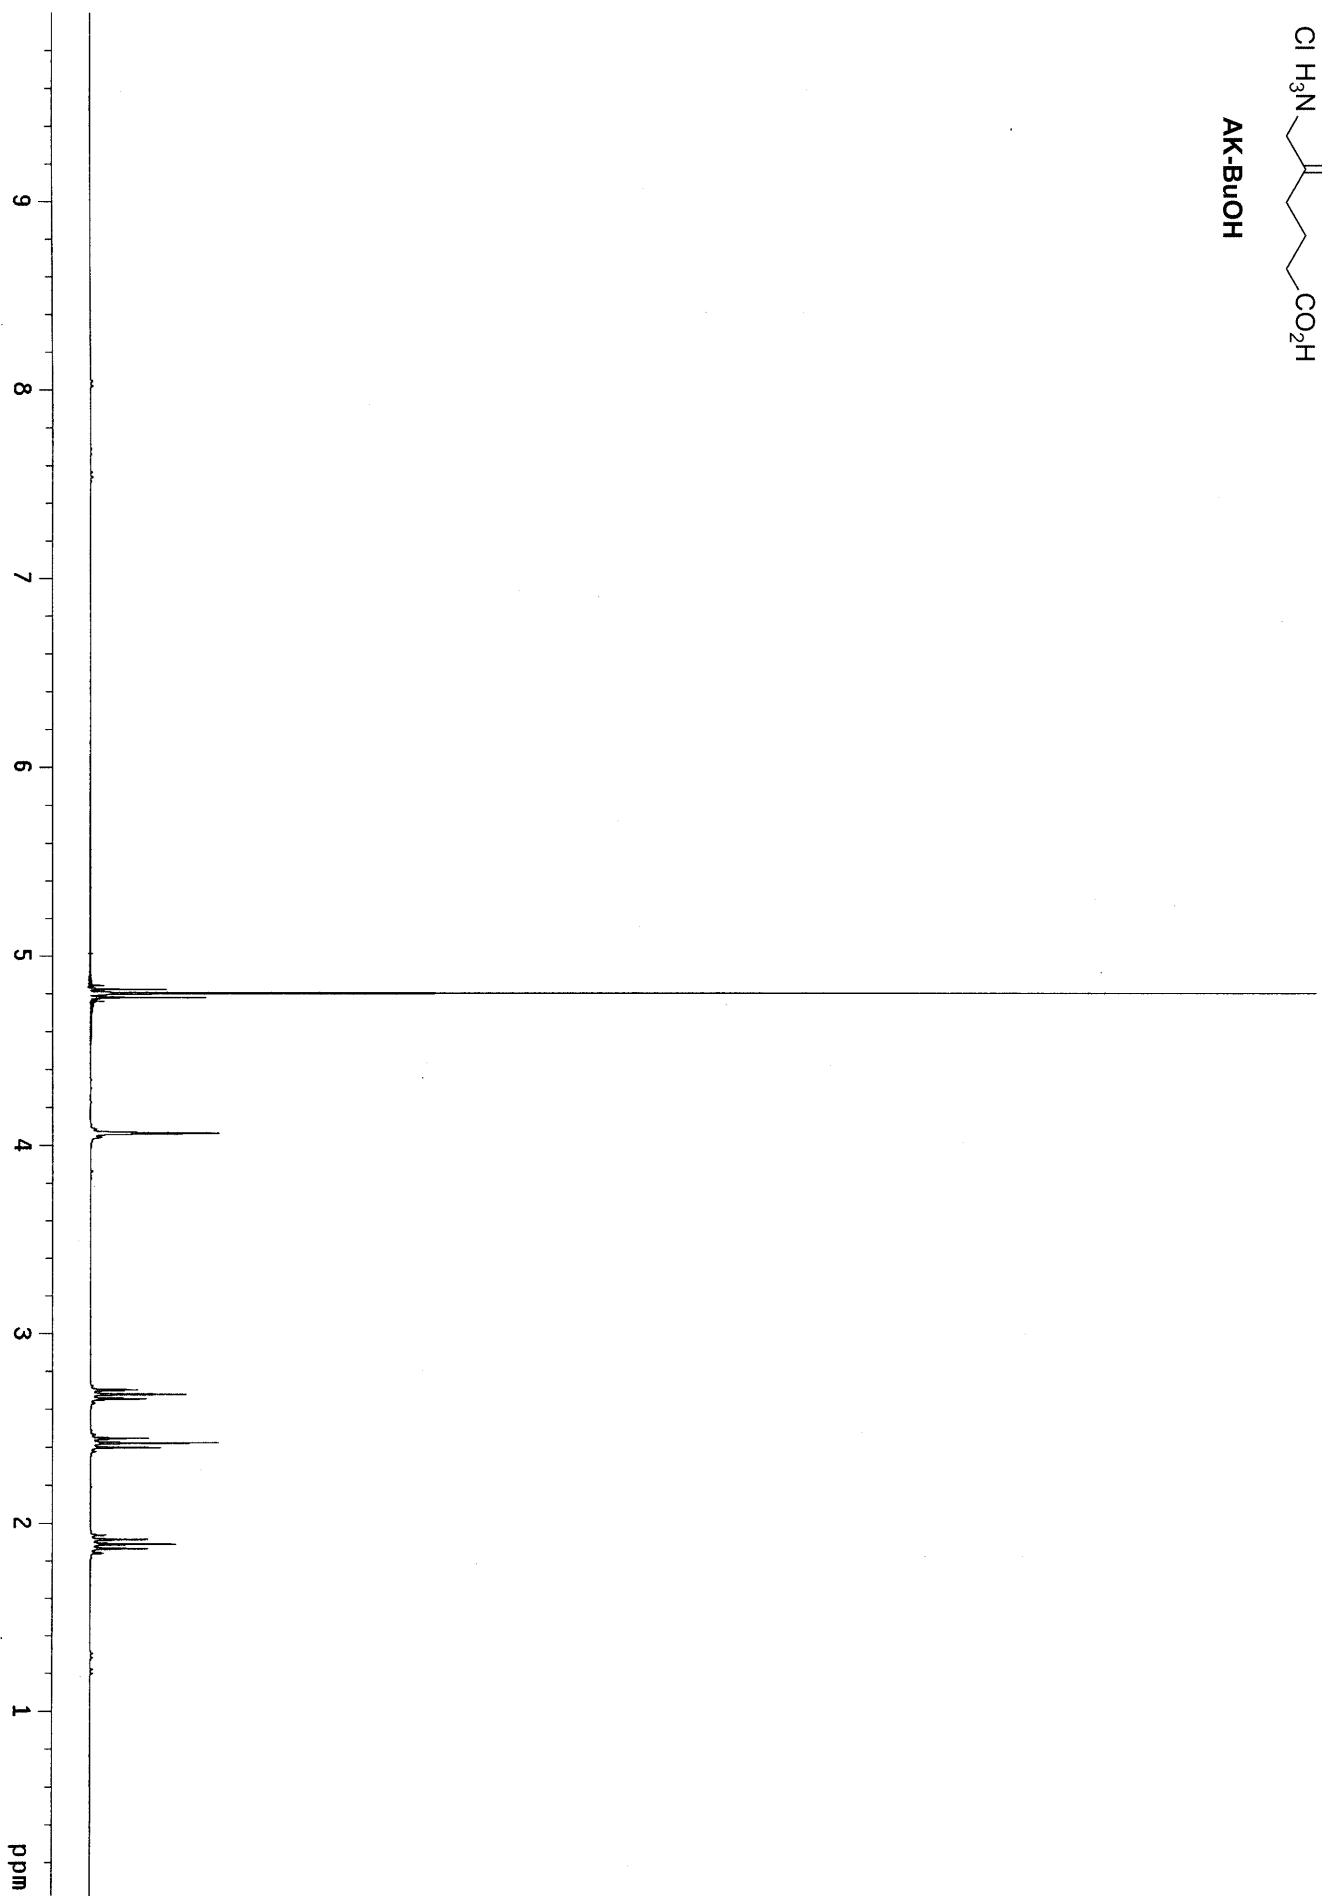

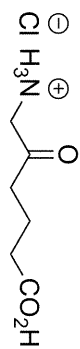

AK-BuOH

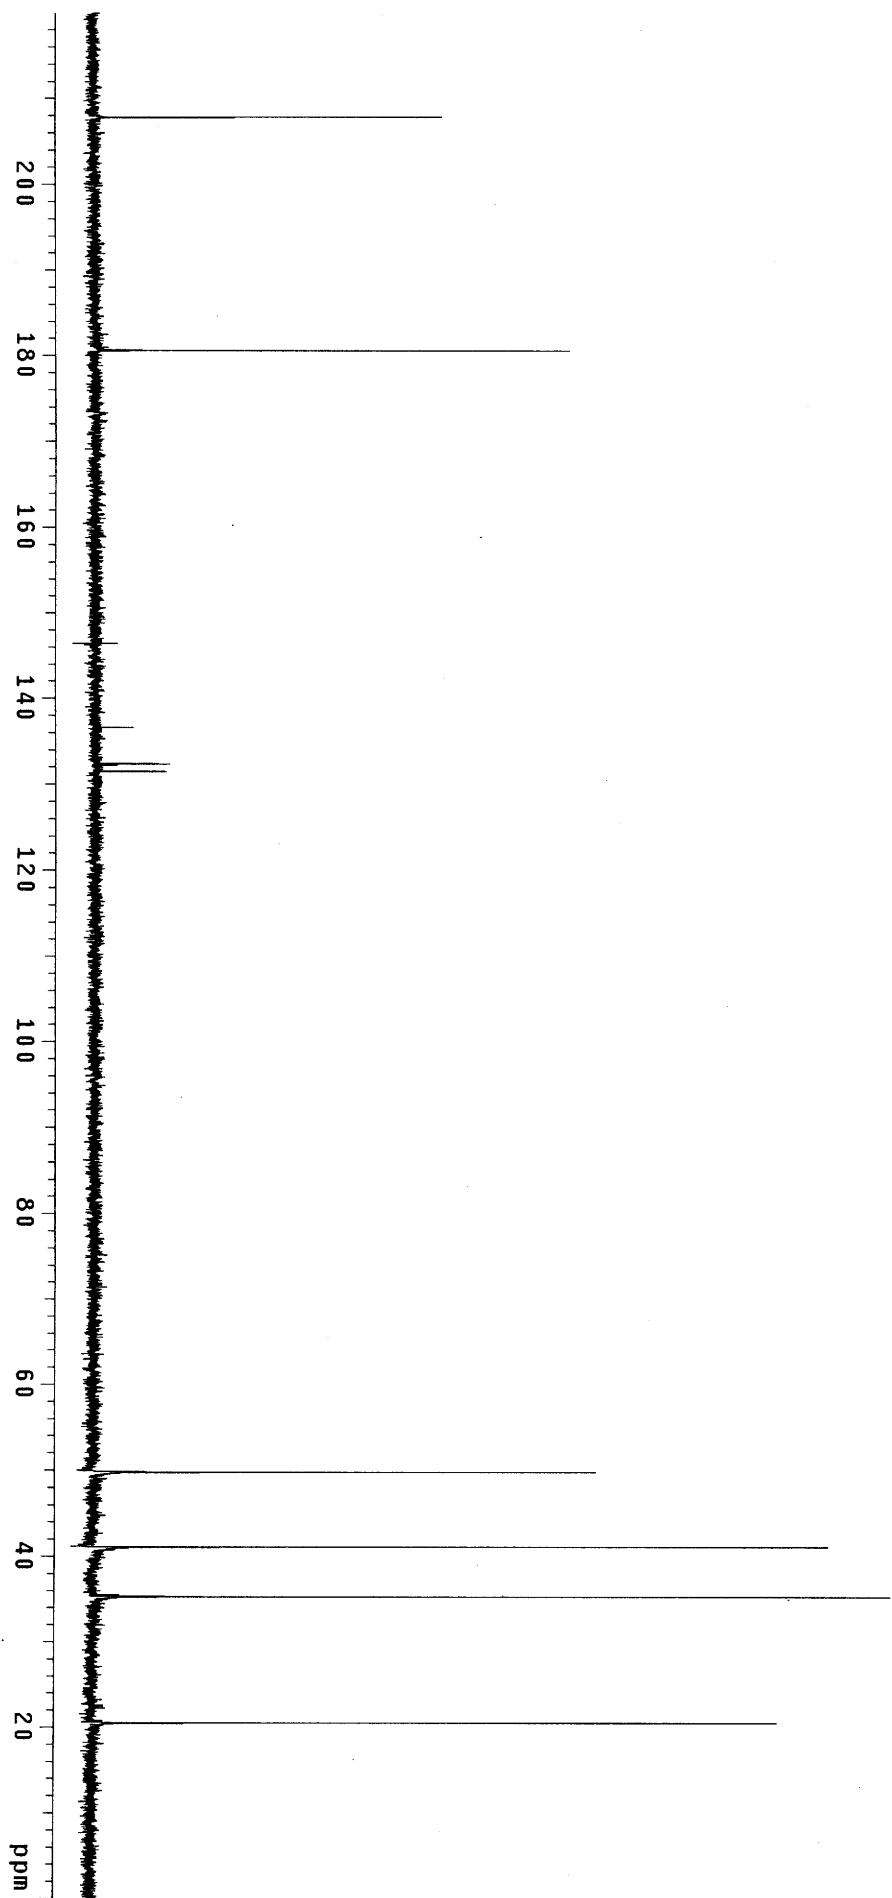

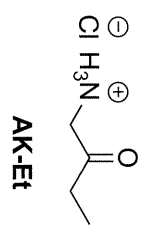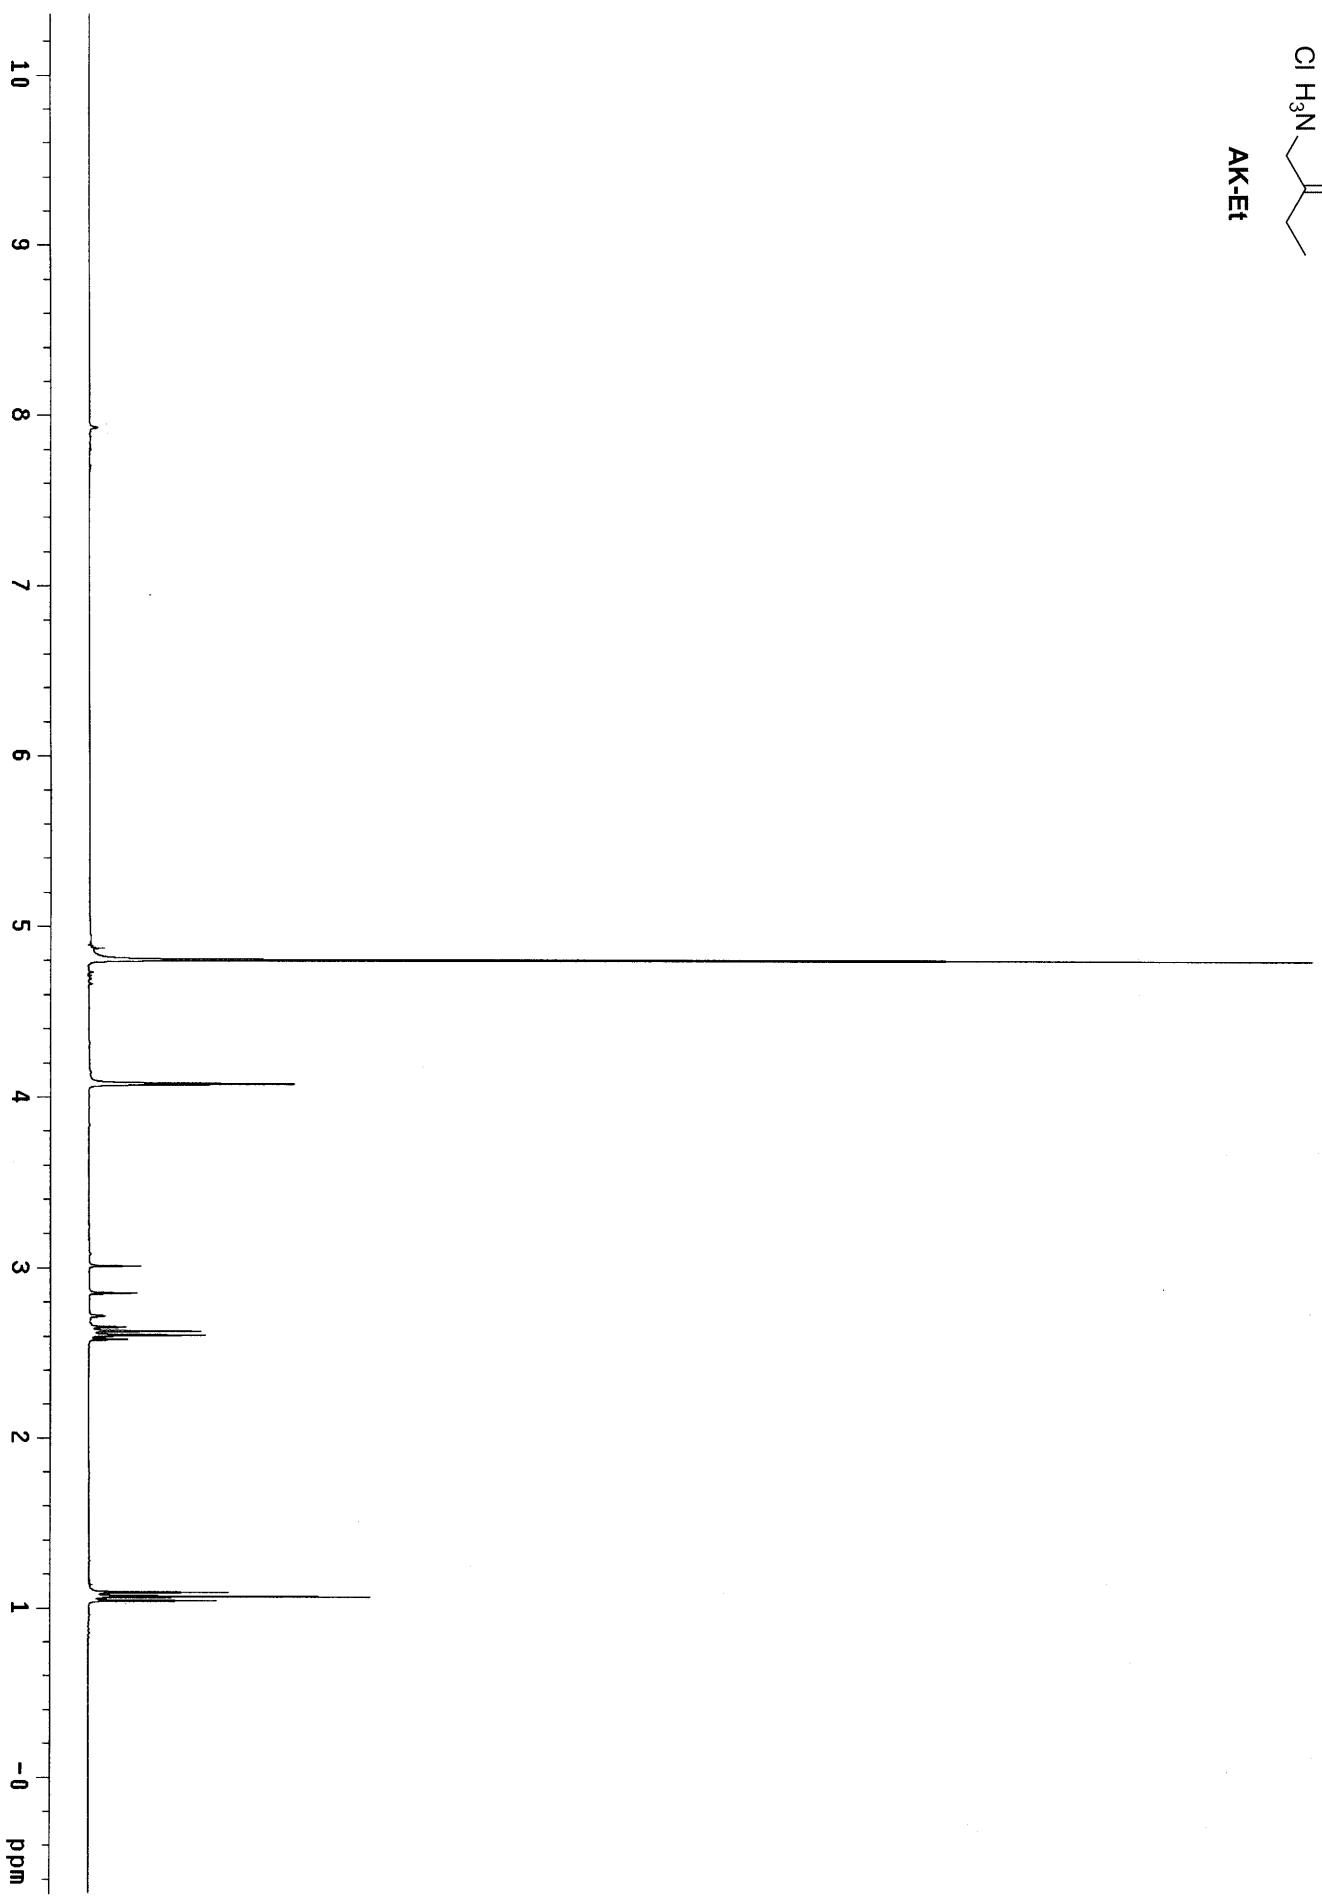

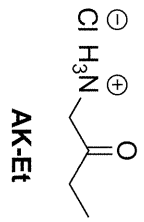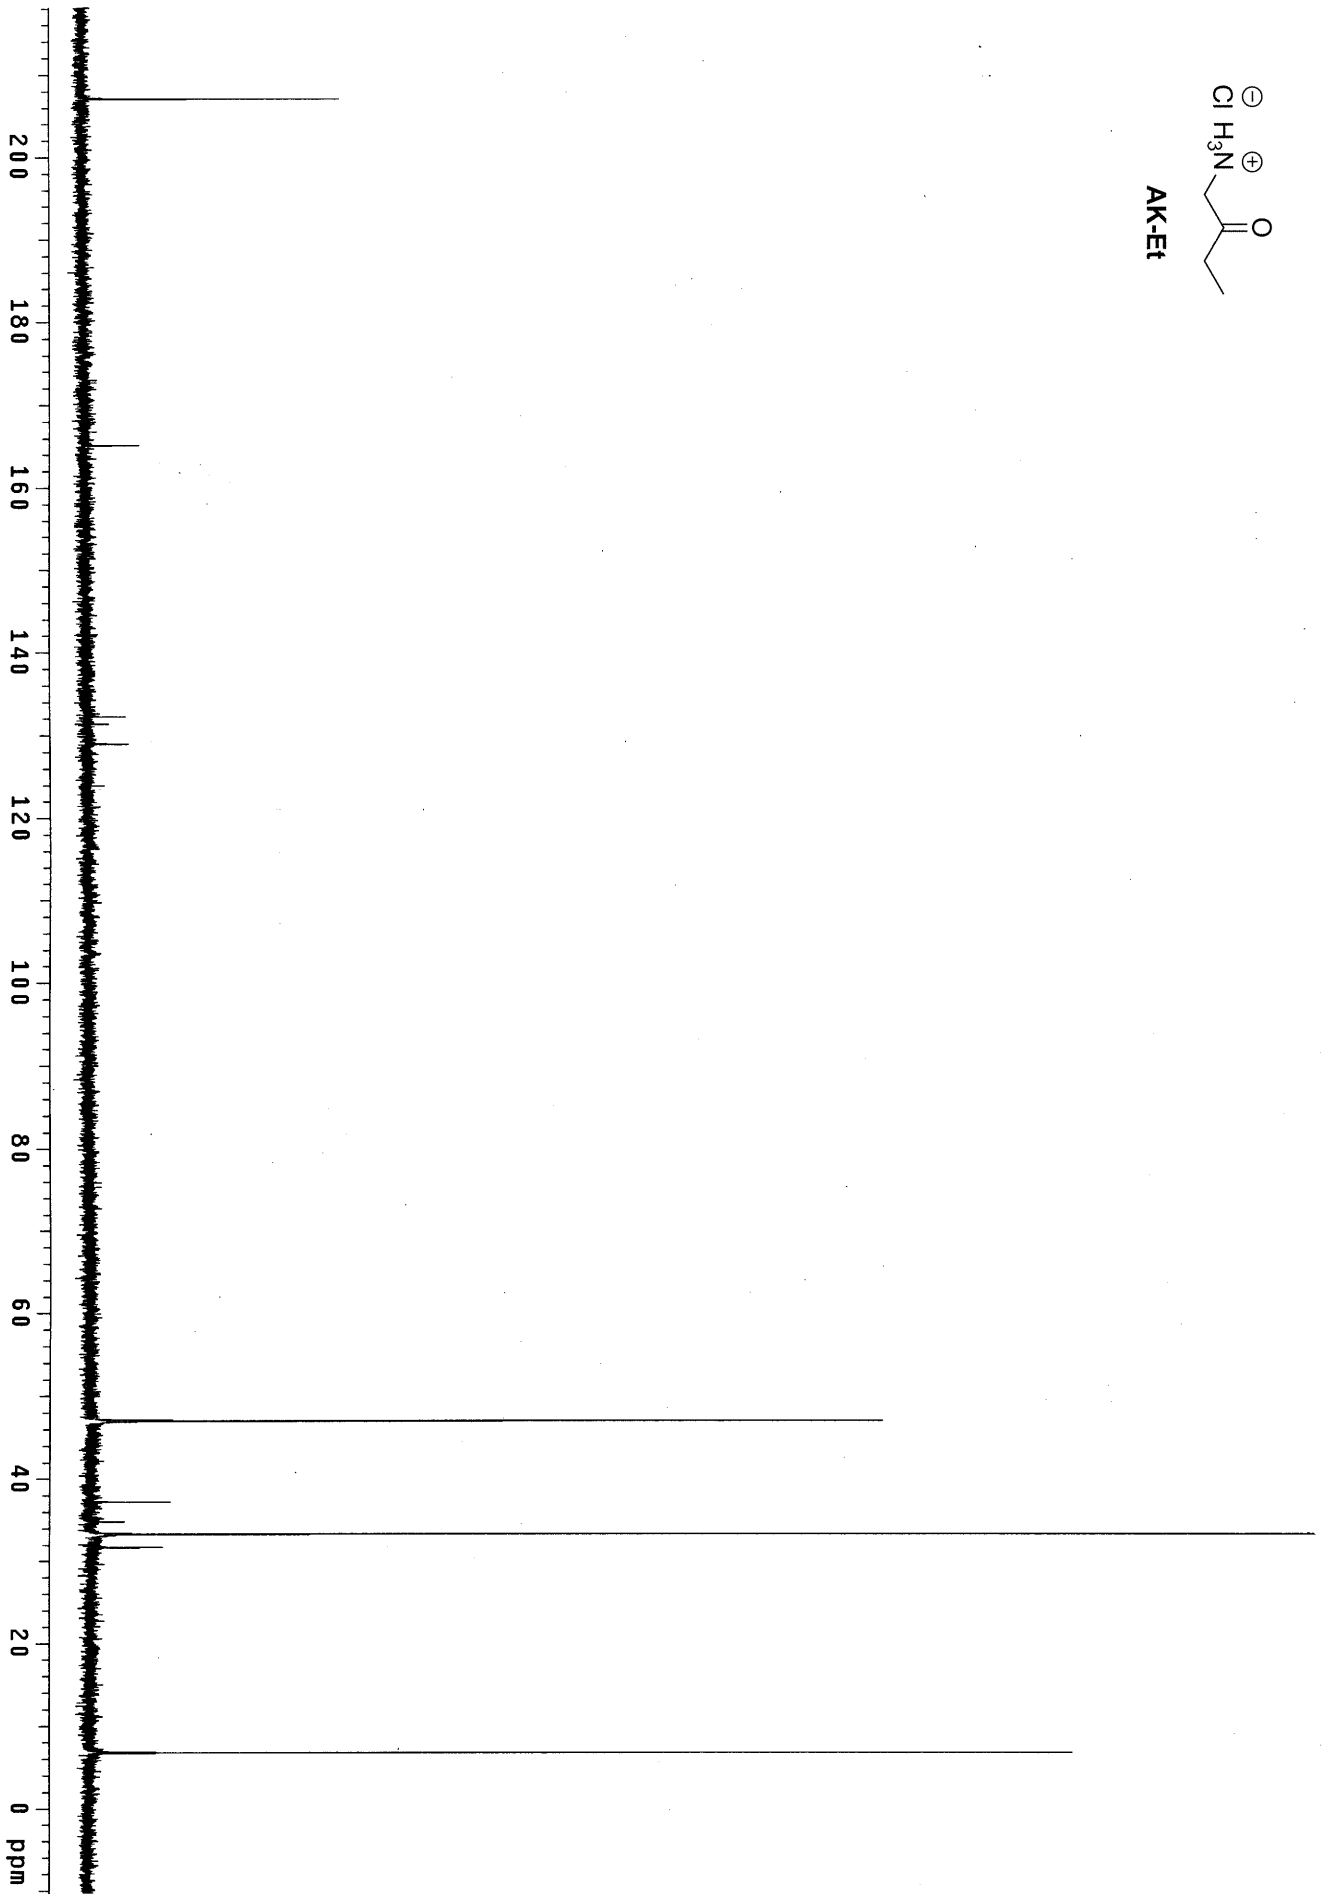

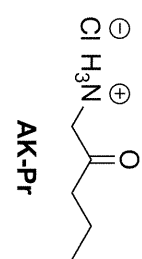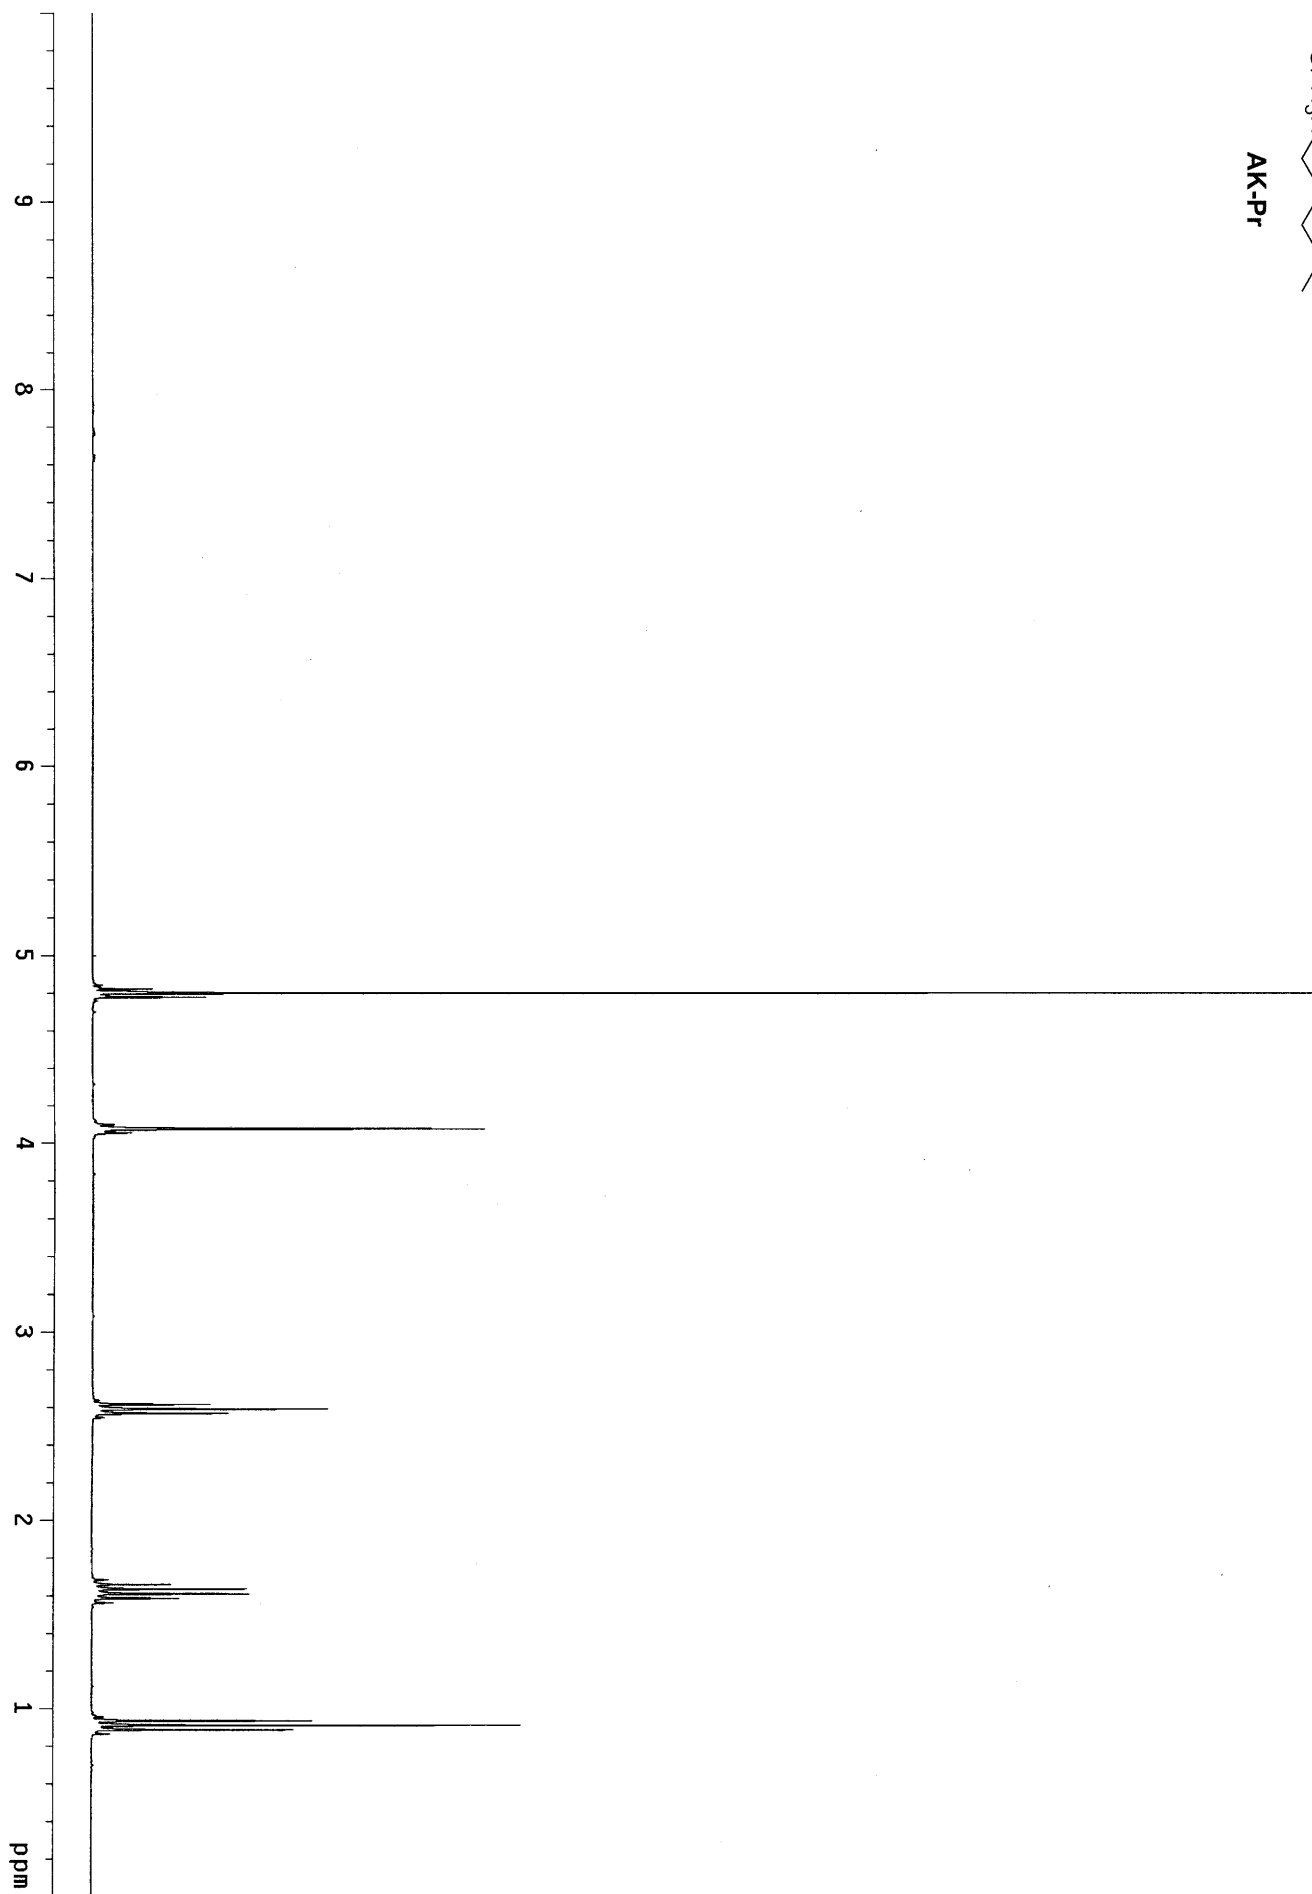



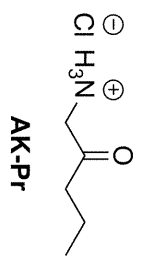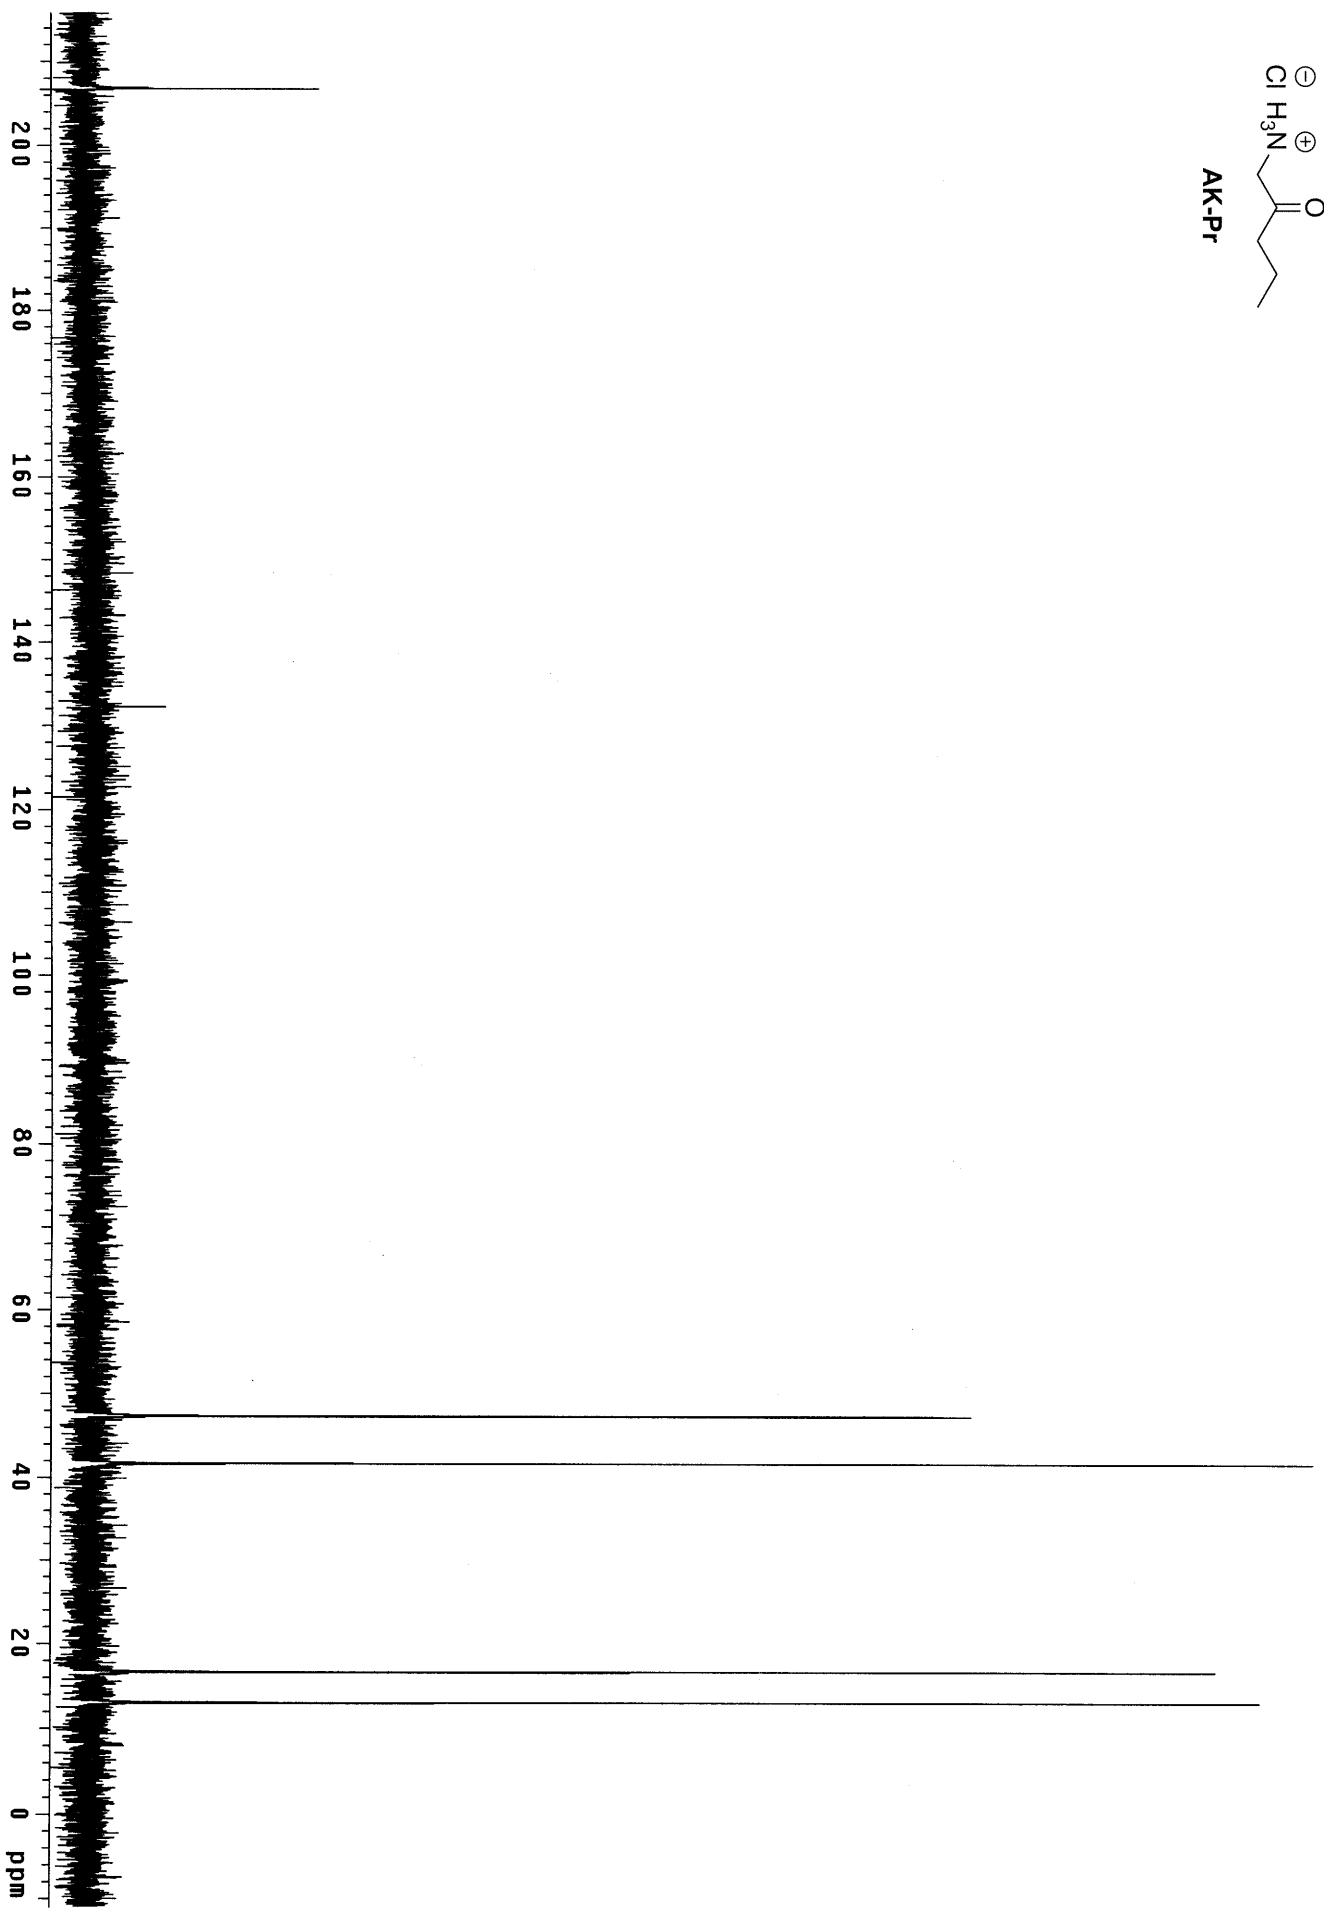

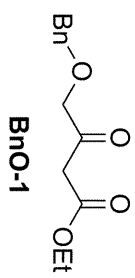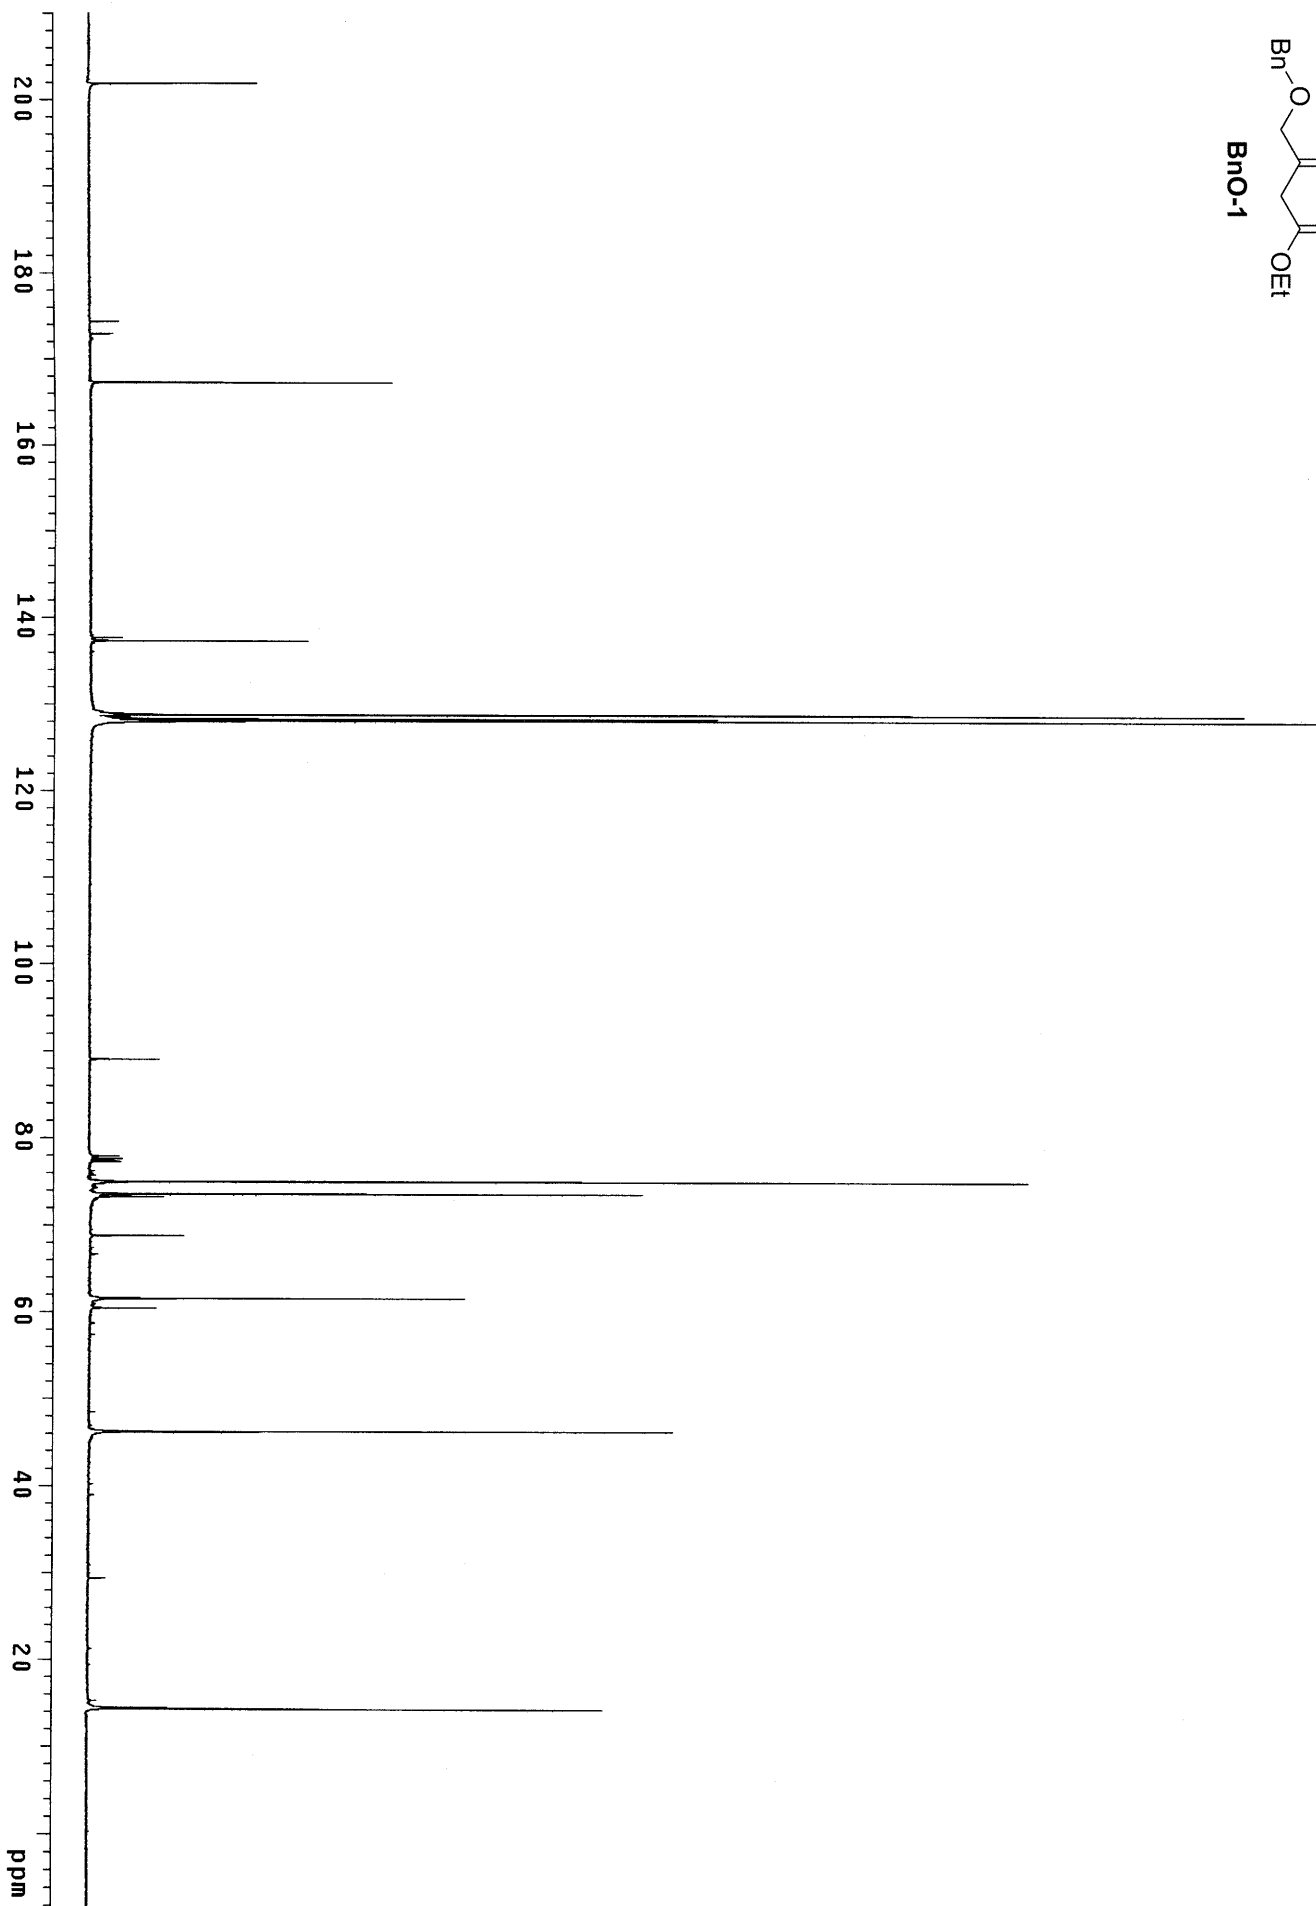

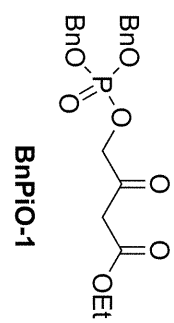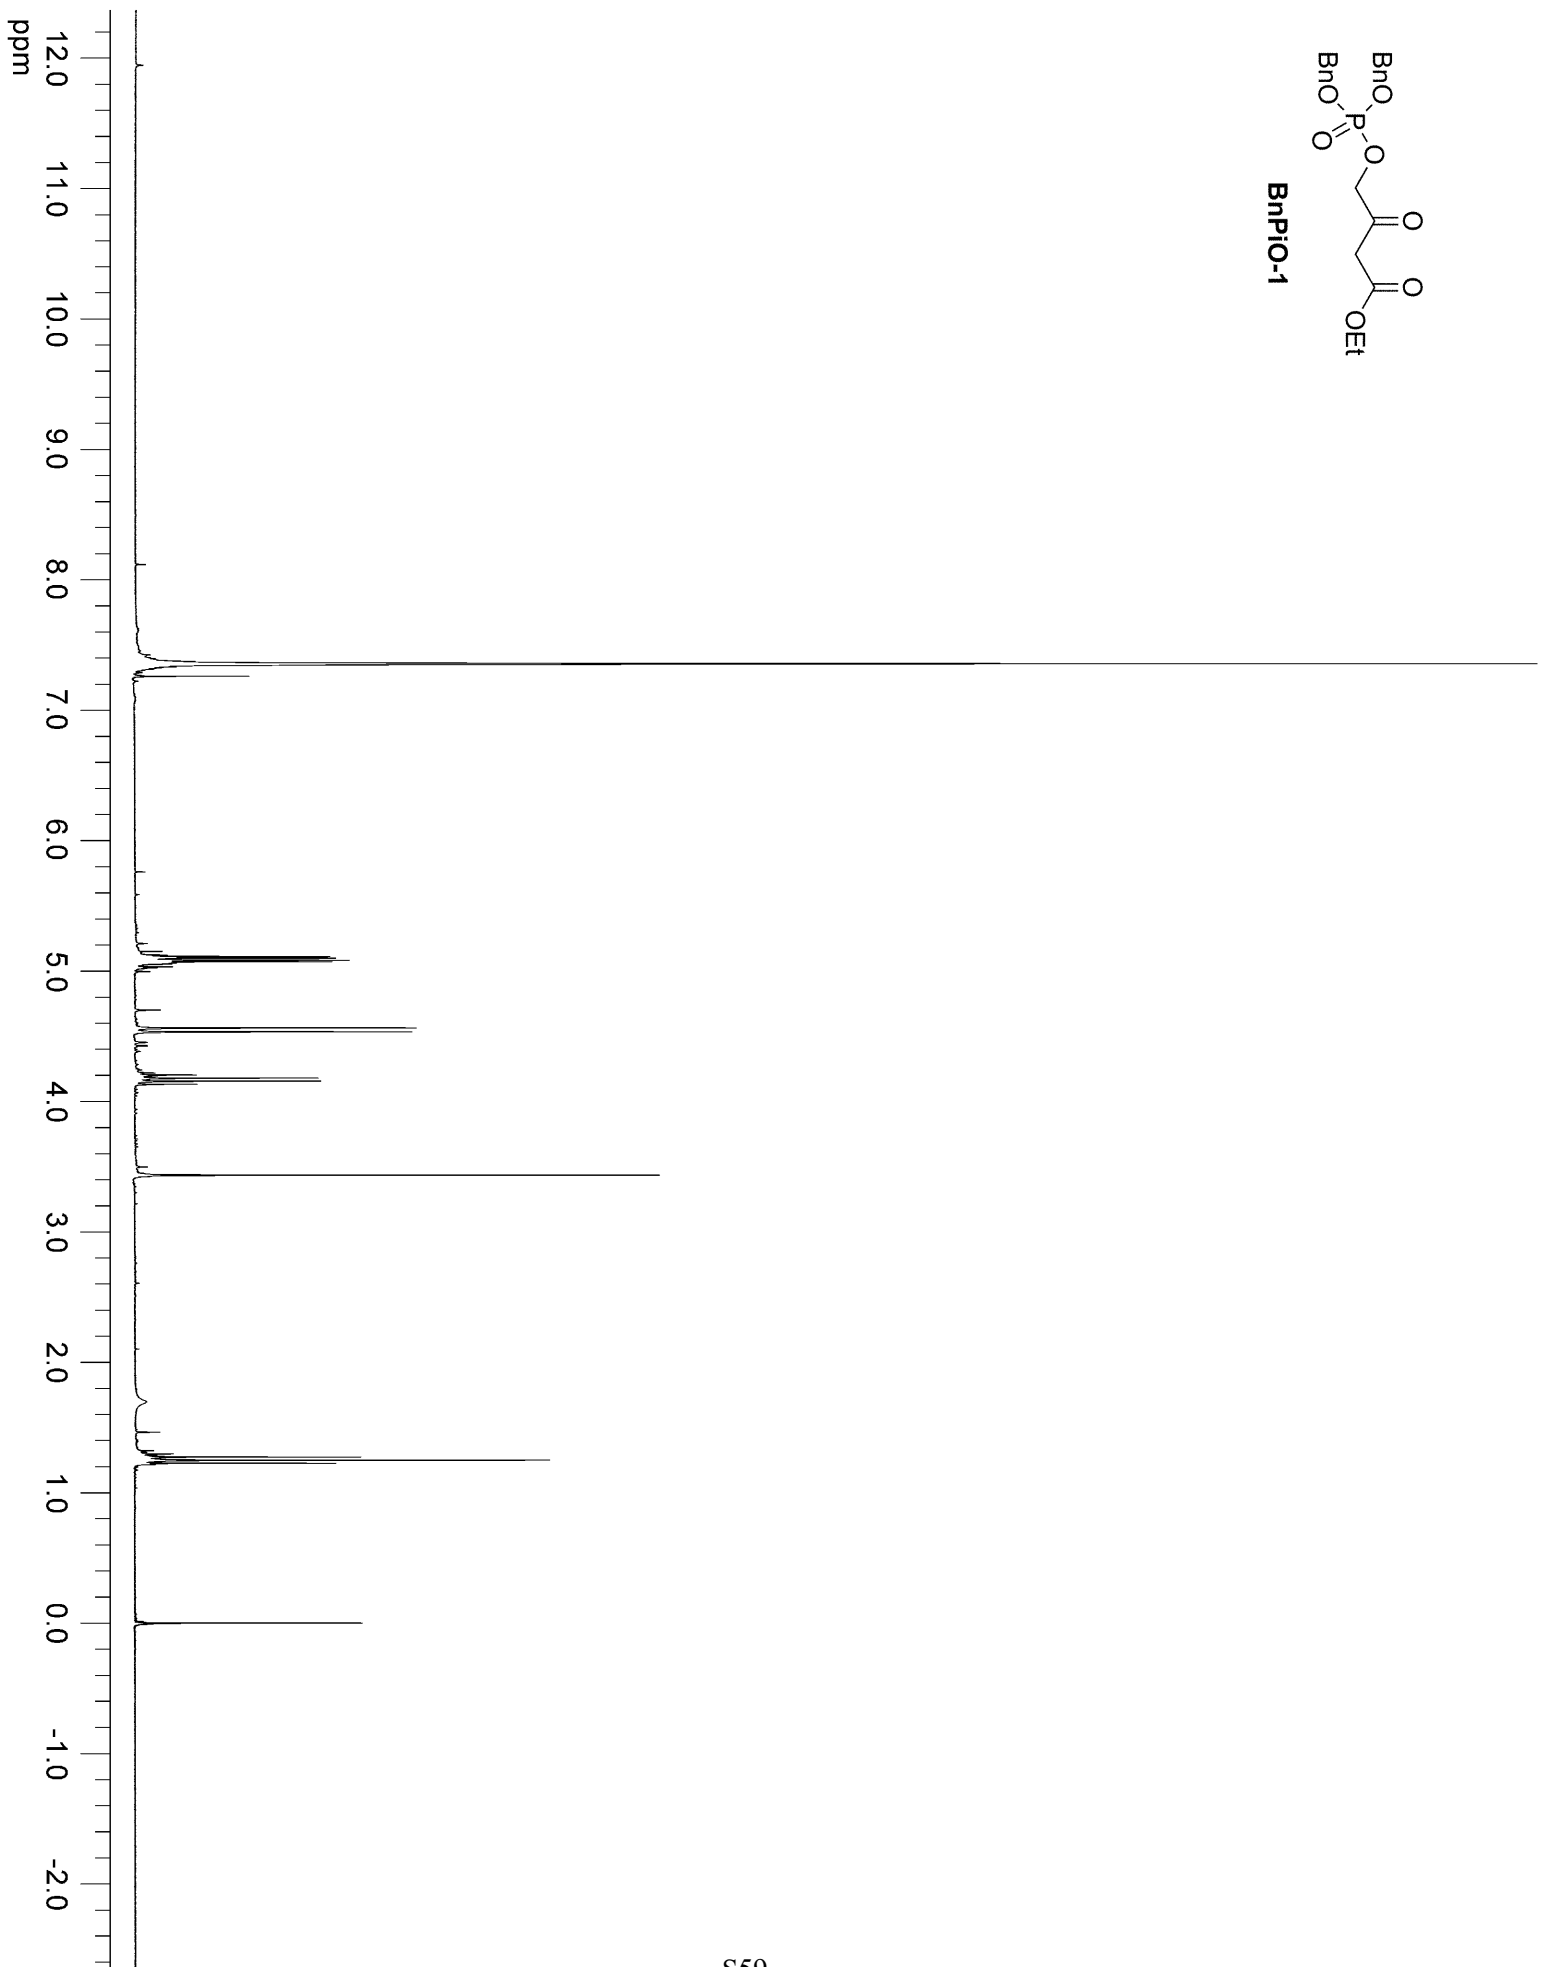

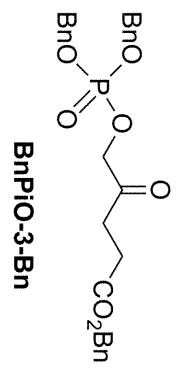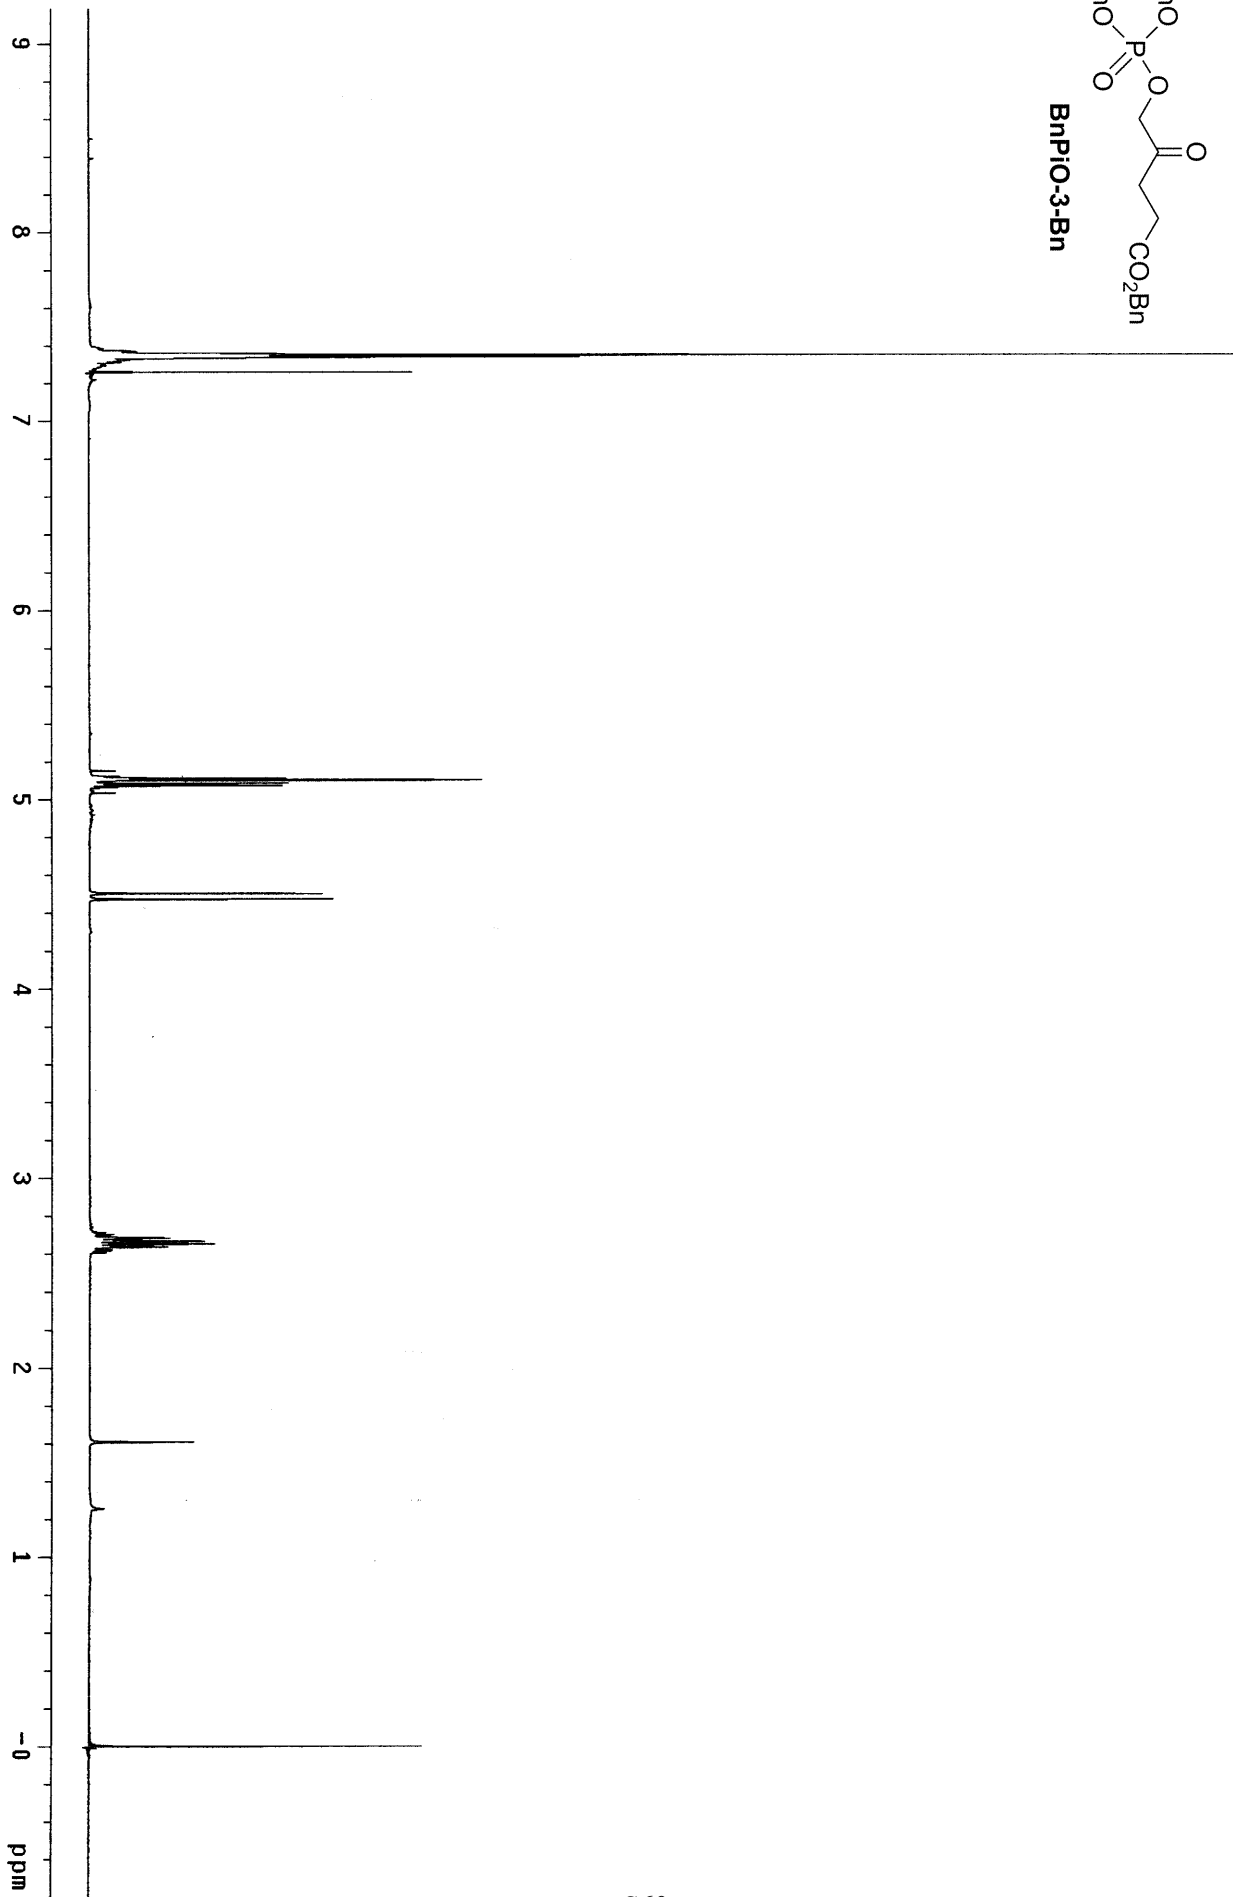

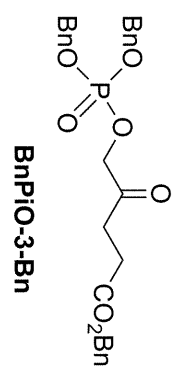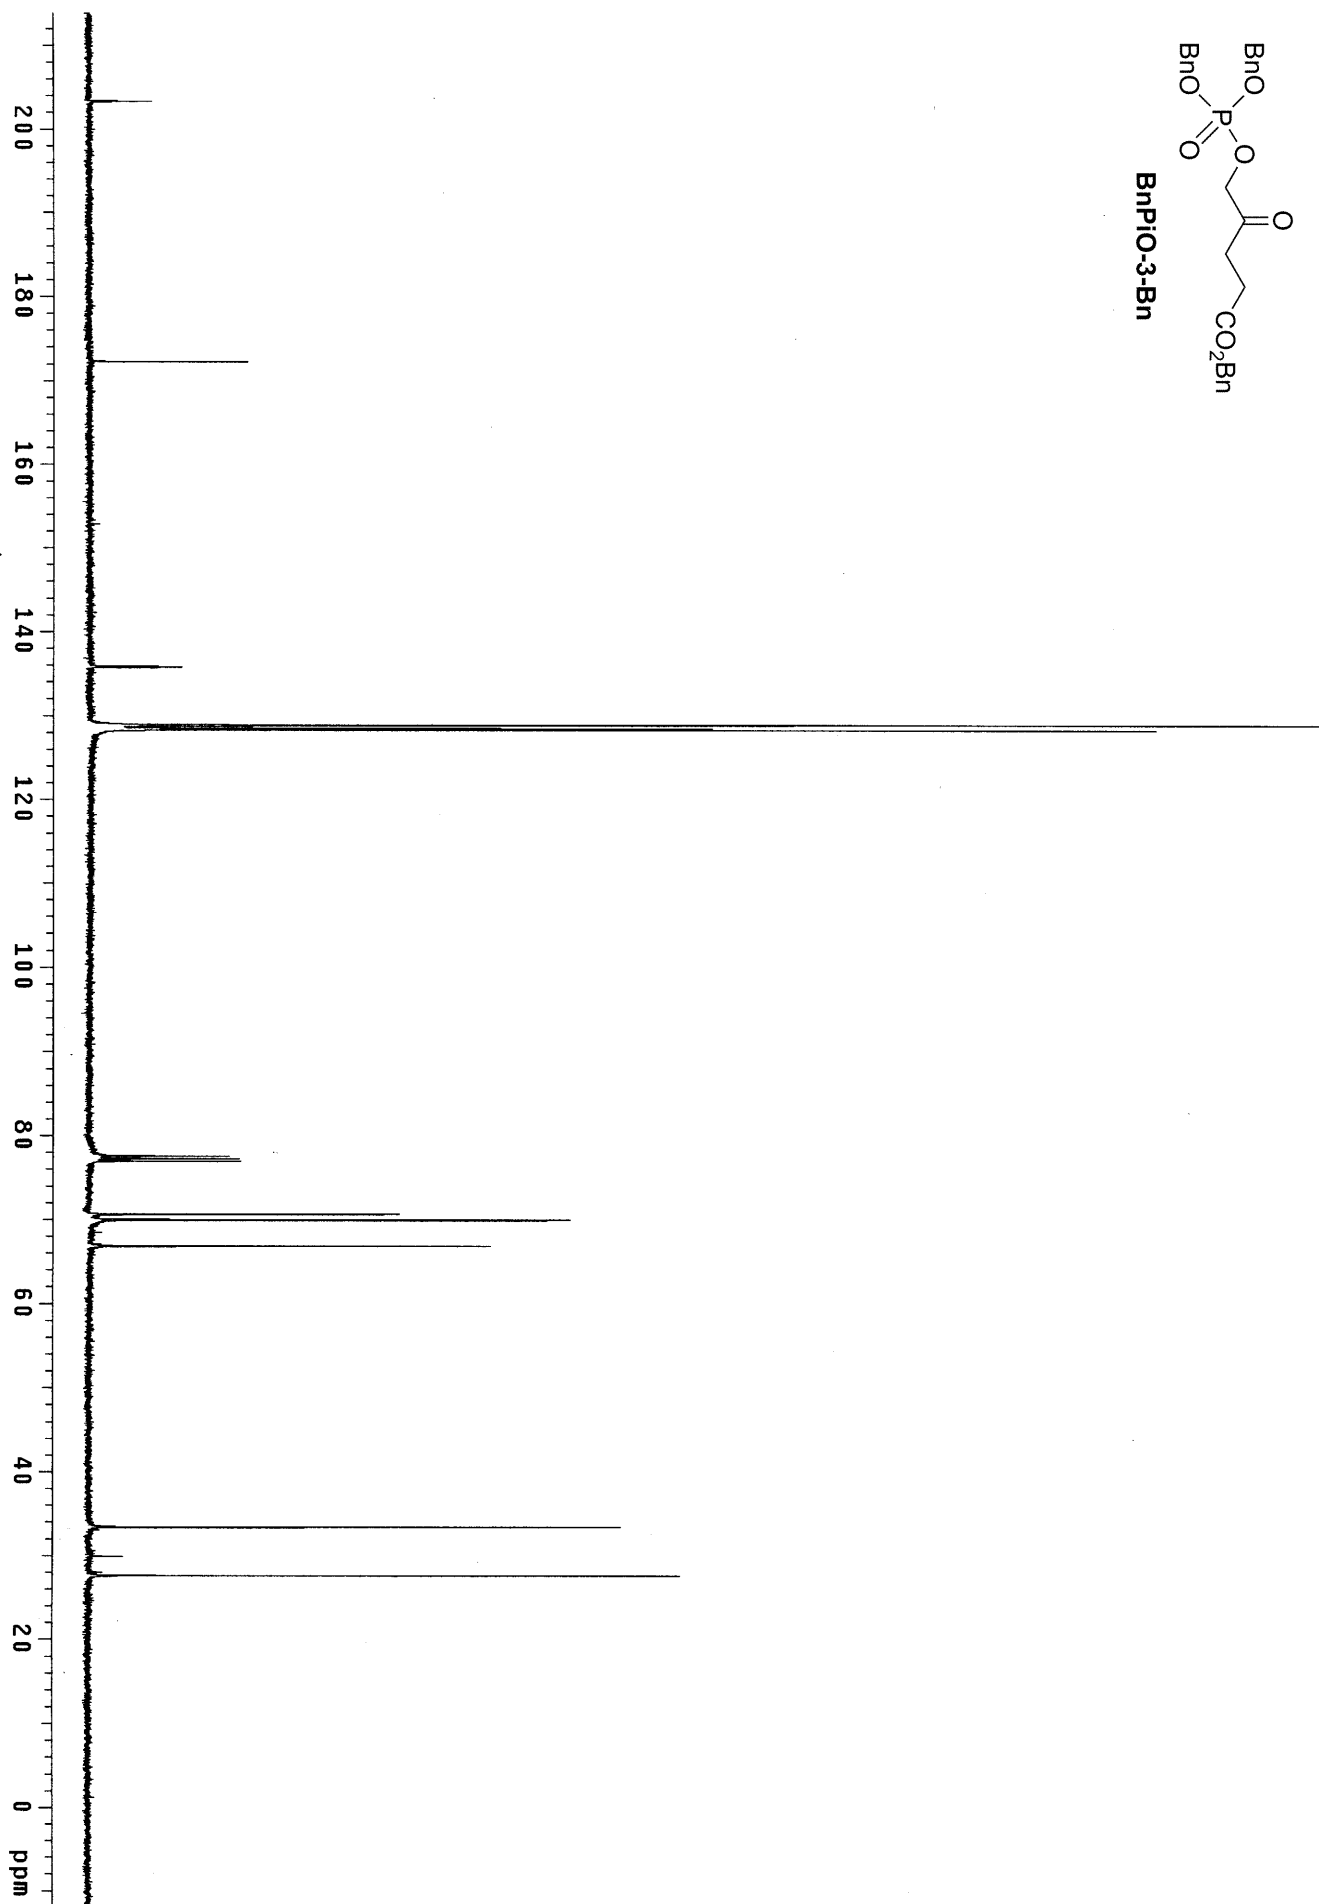

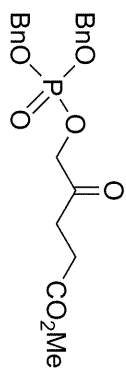

BnPiO-3-Me

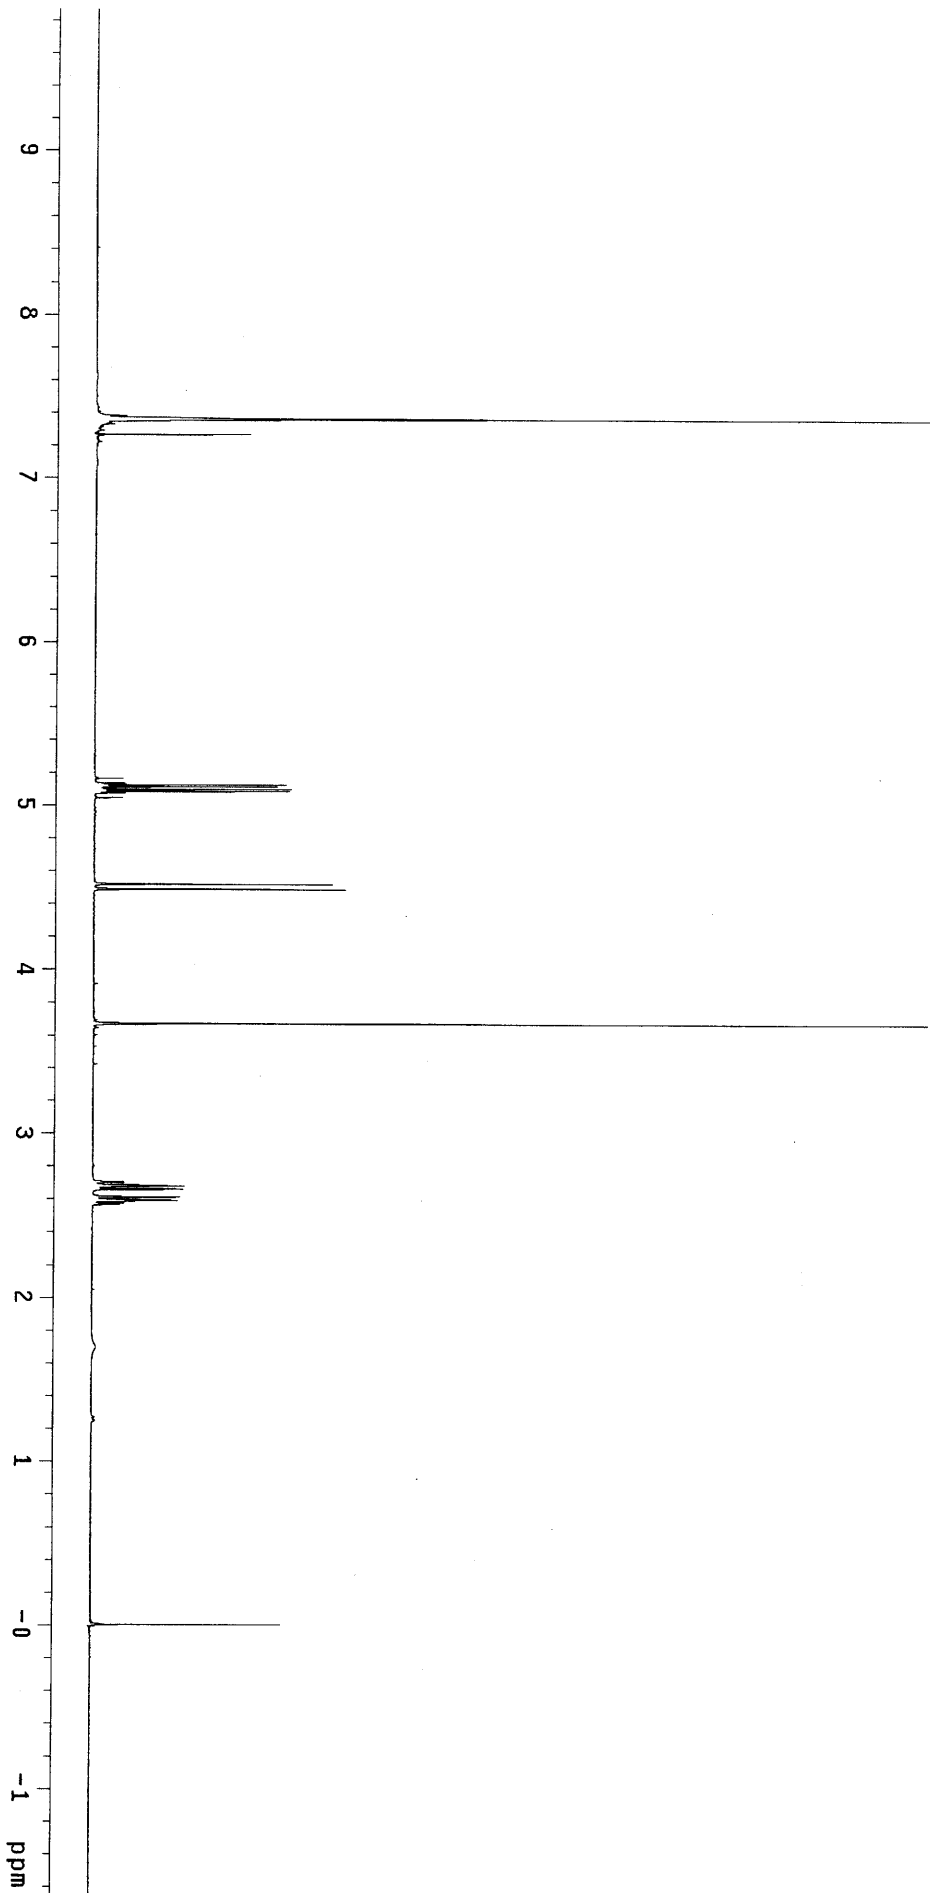

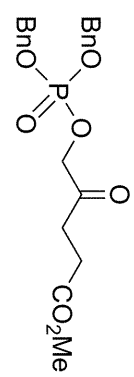

BnPiO-3-Me

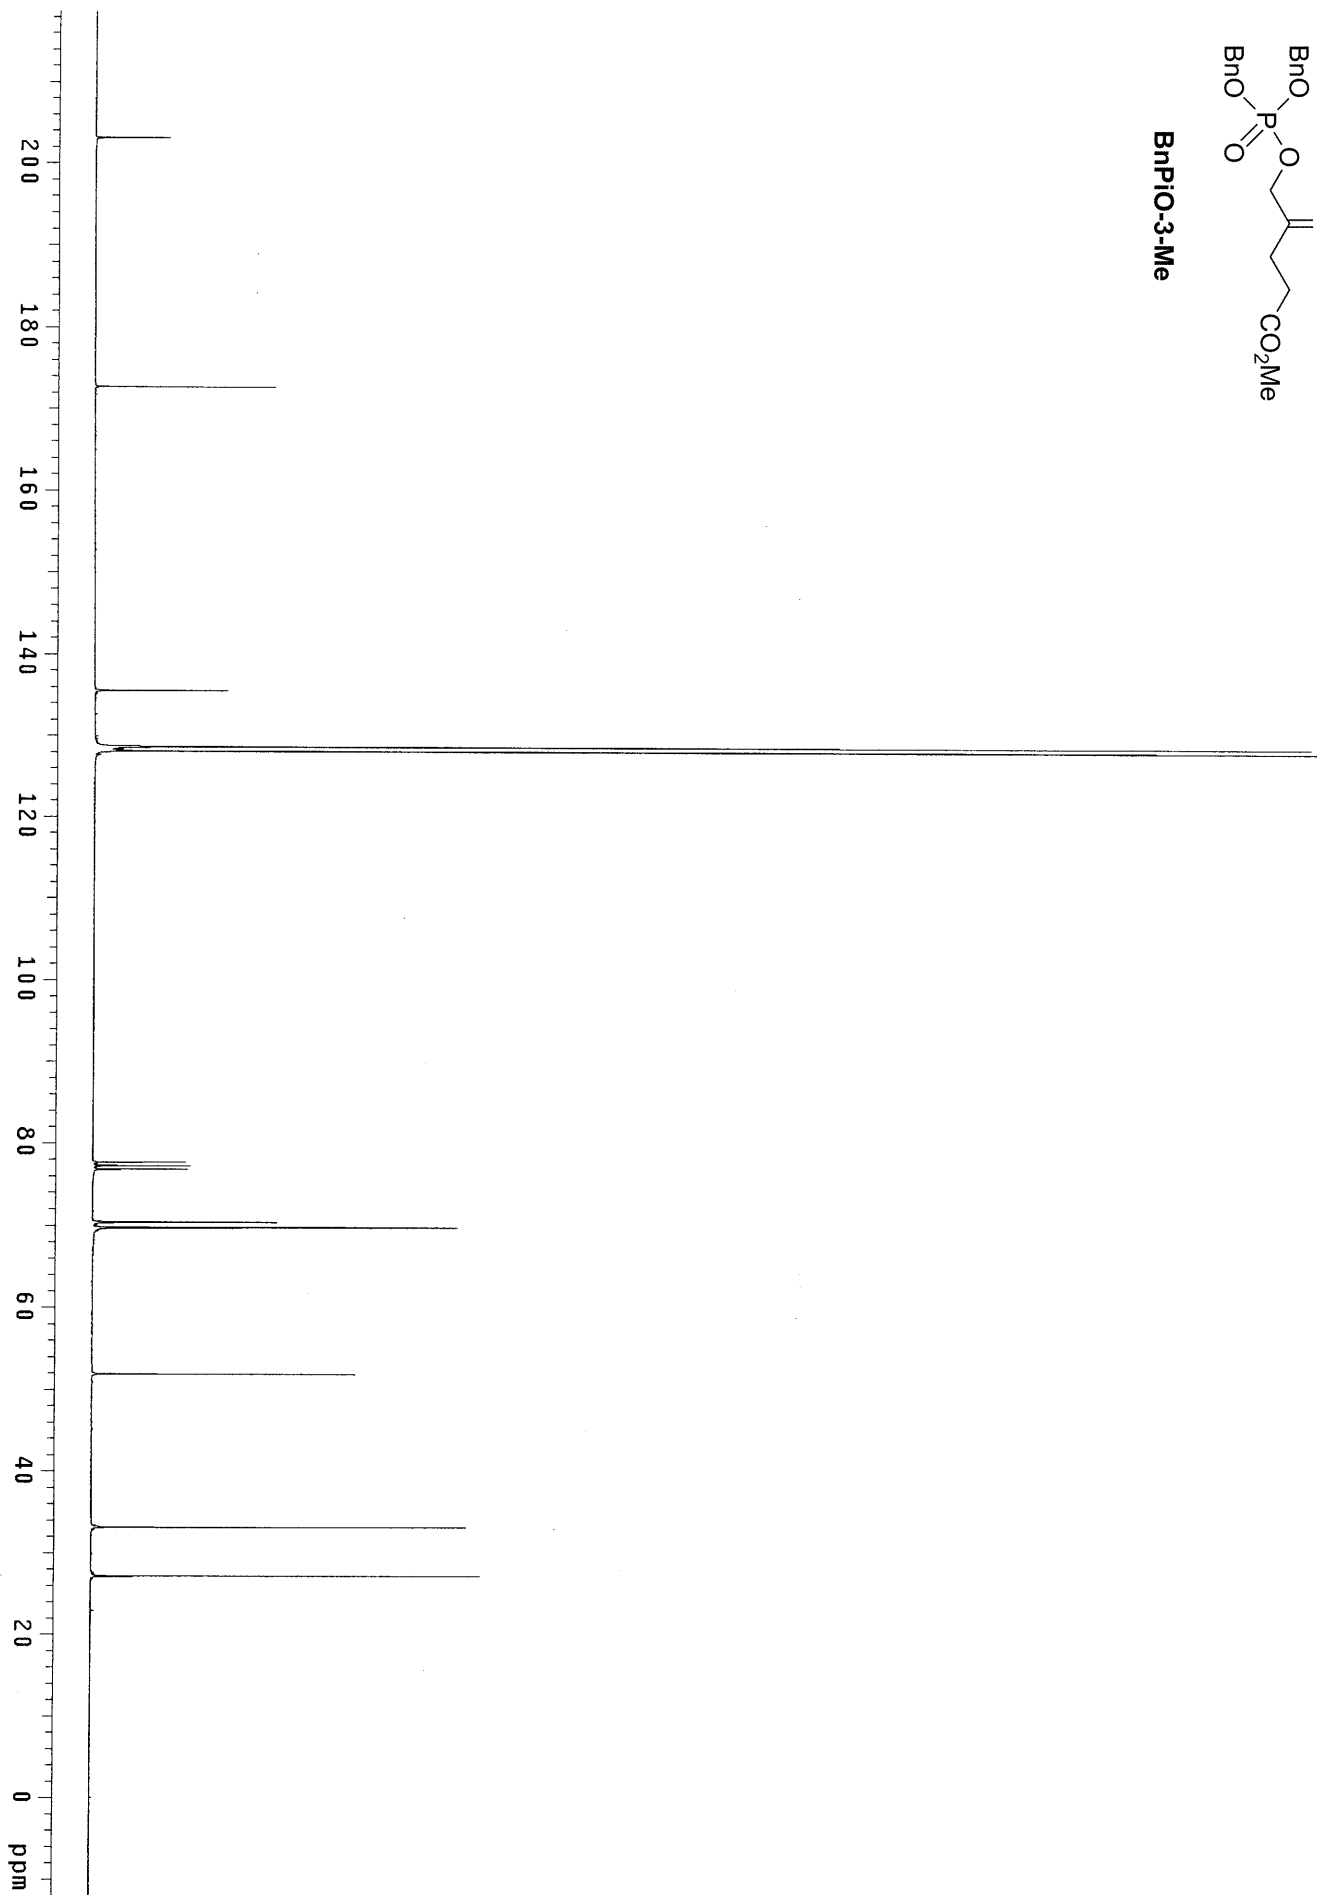

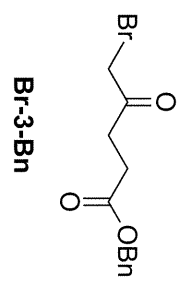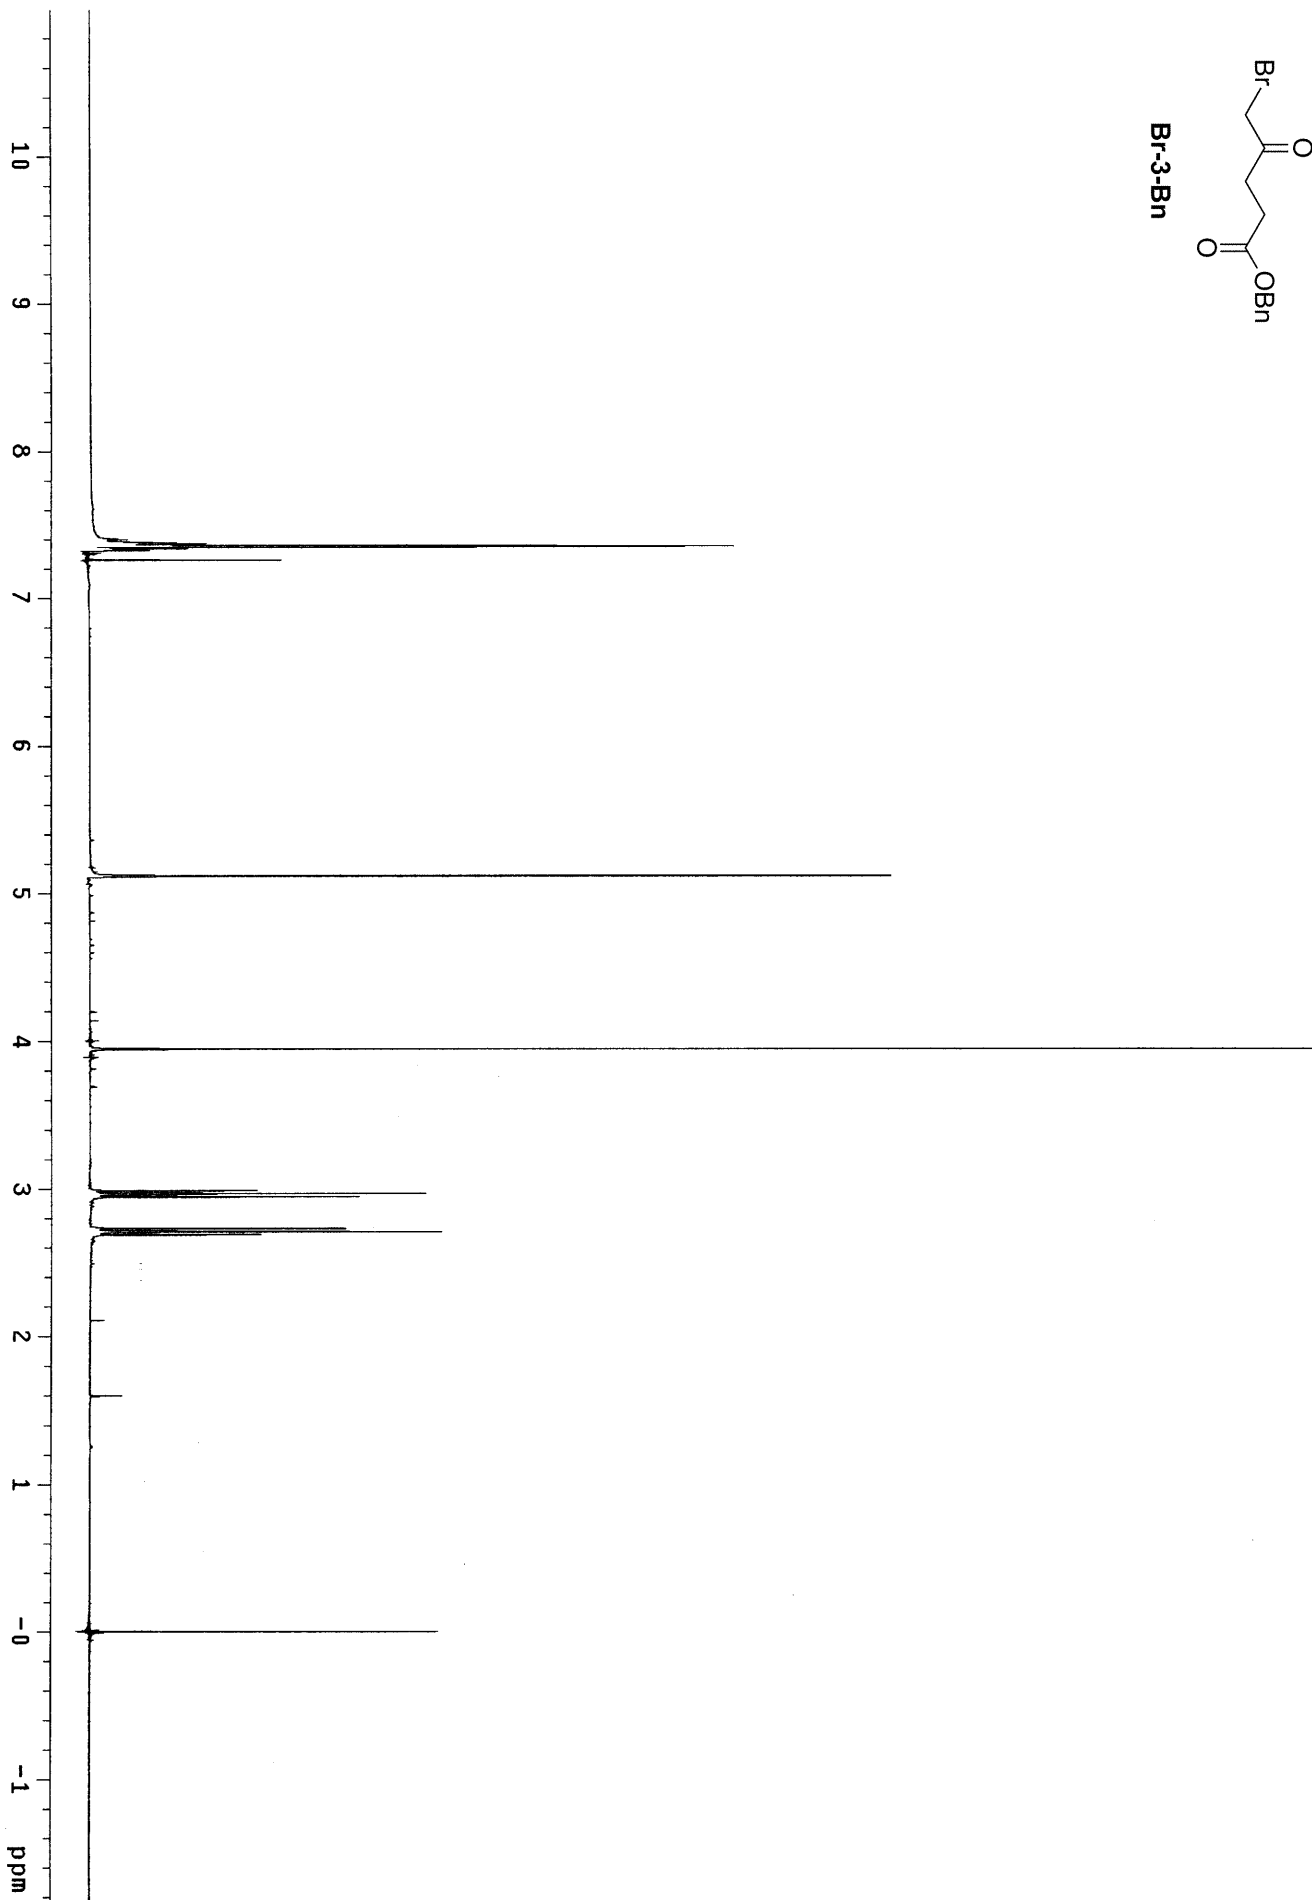



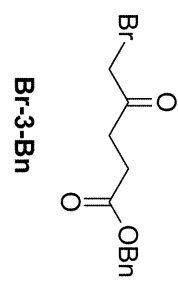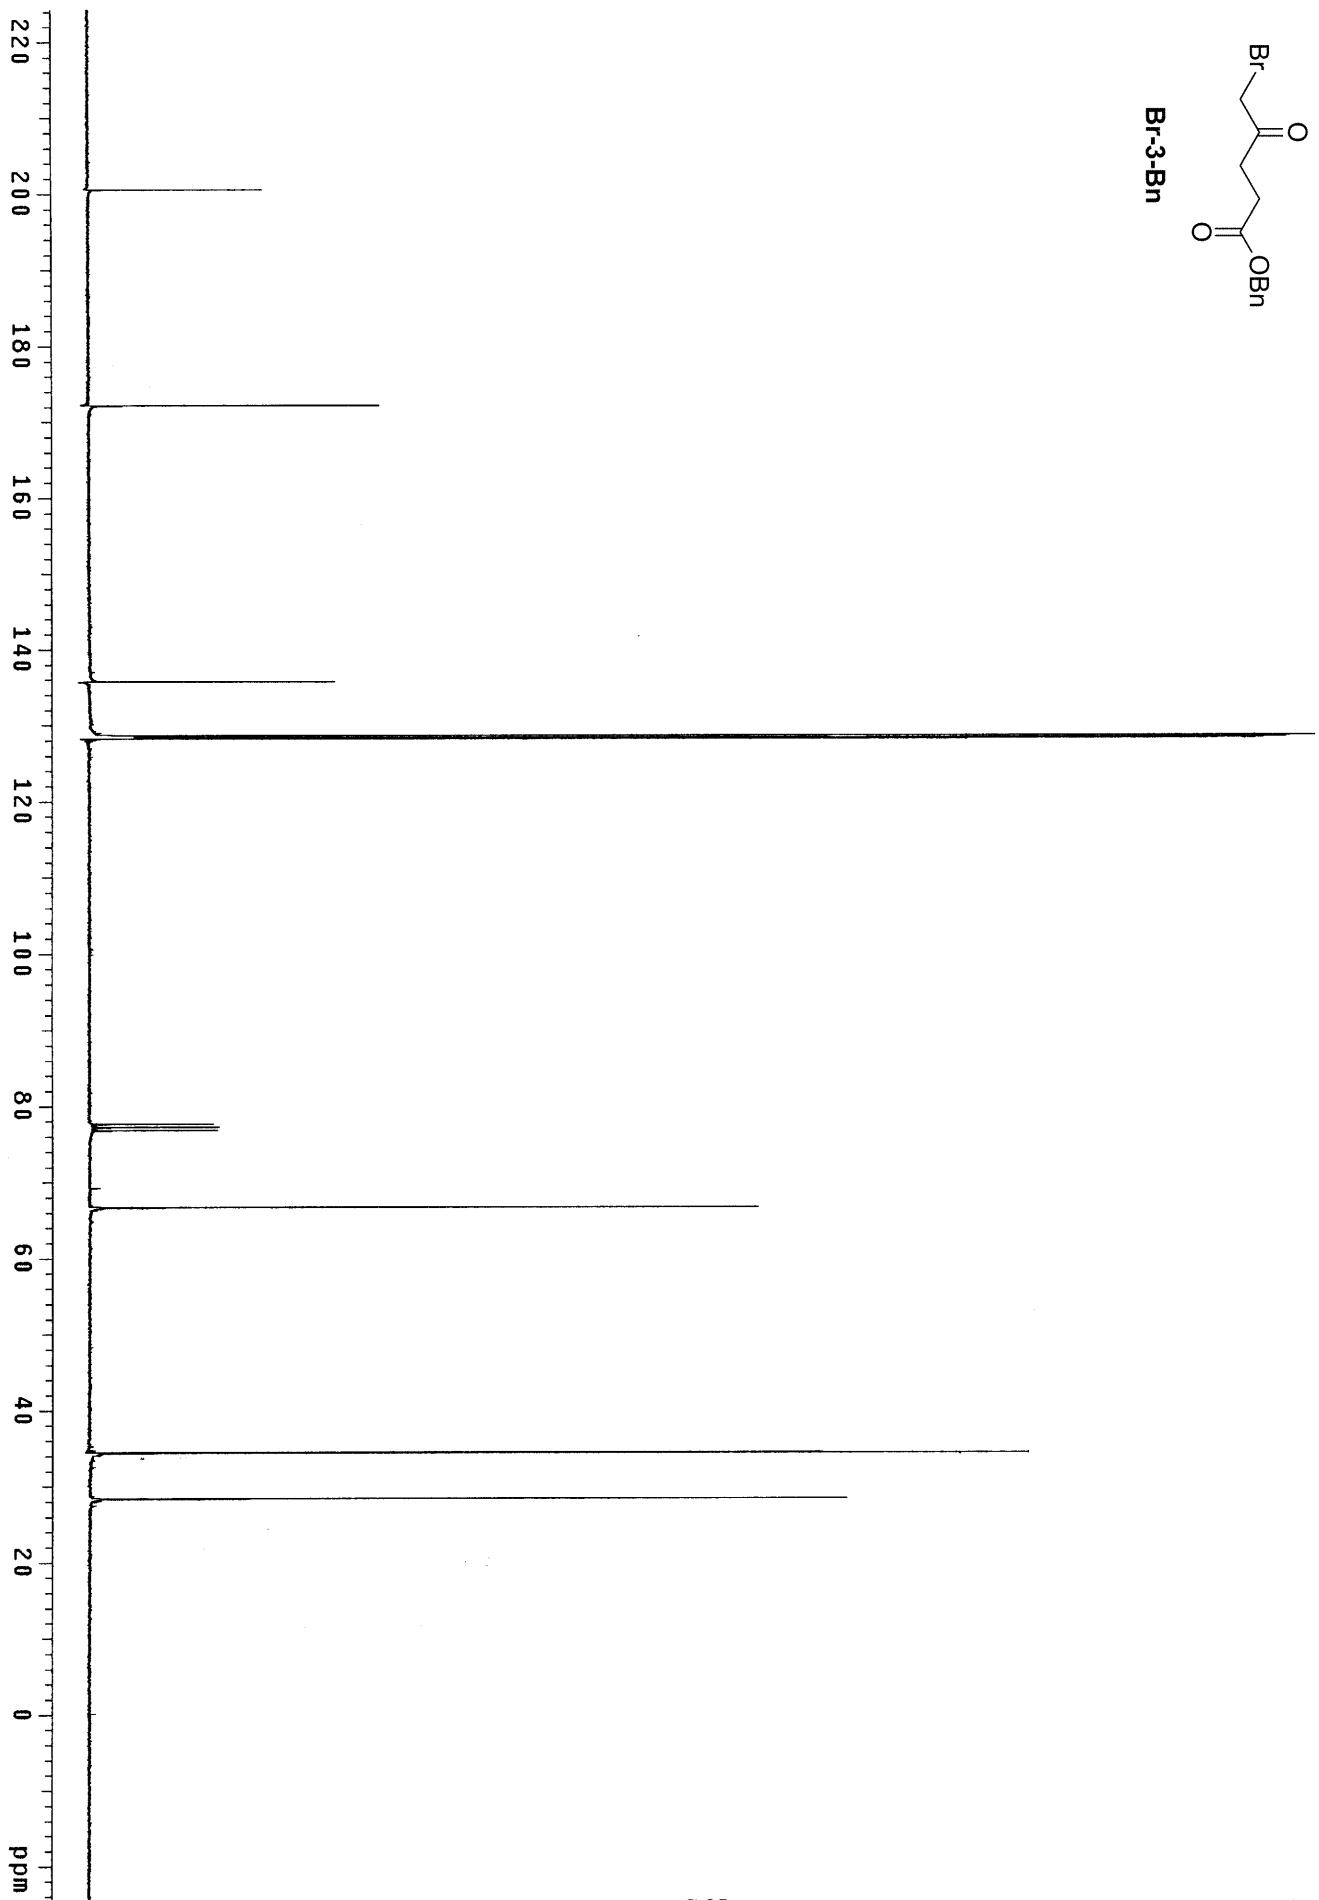

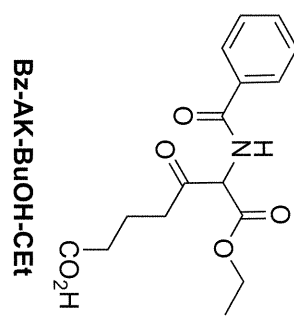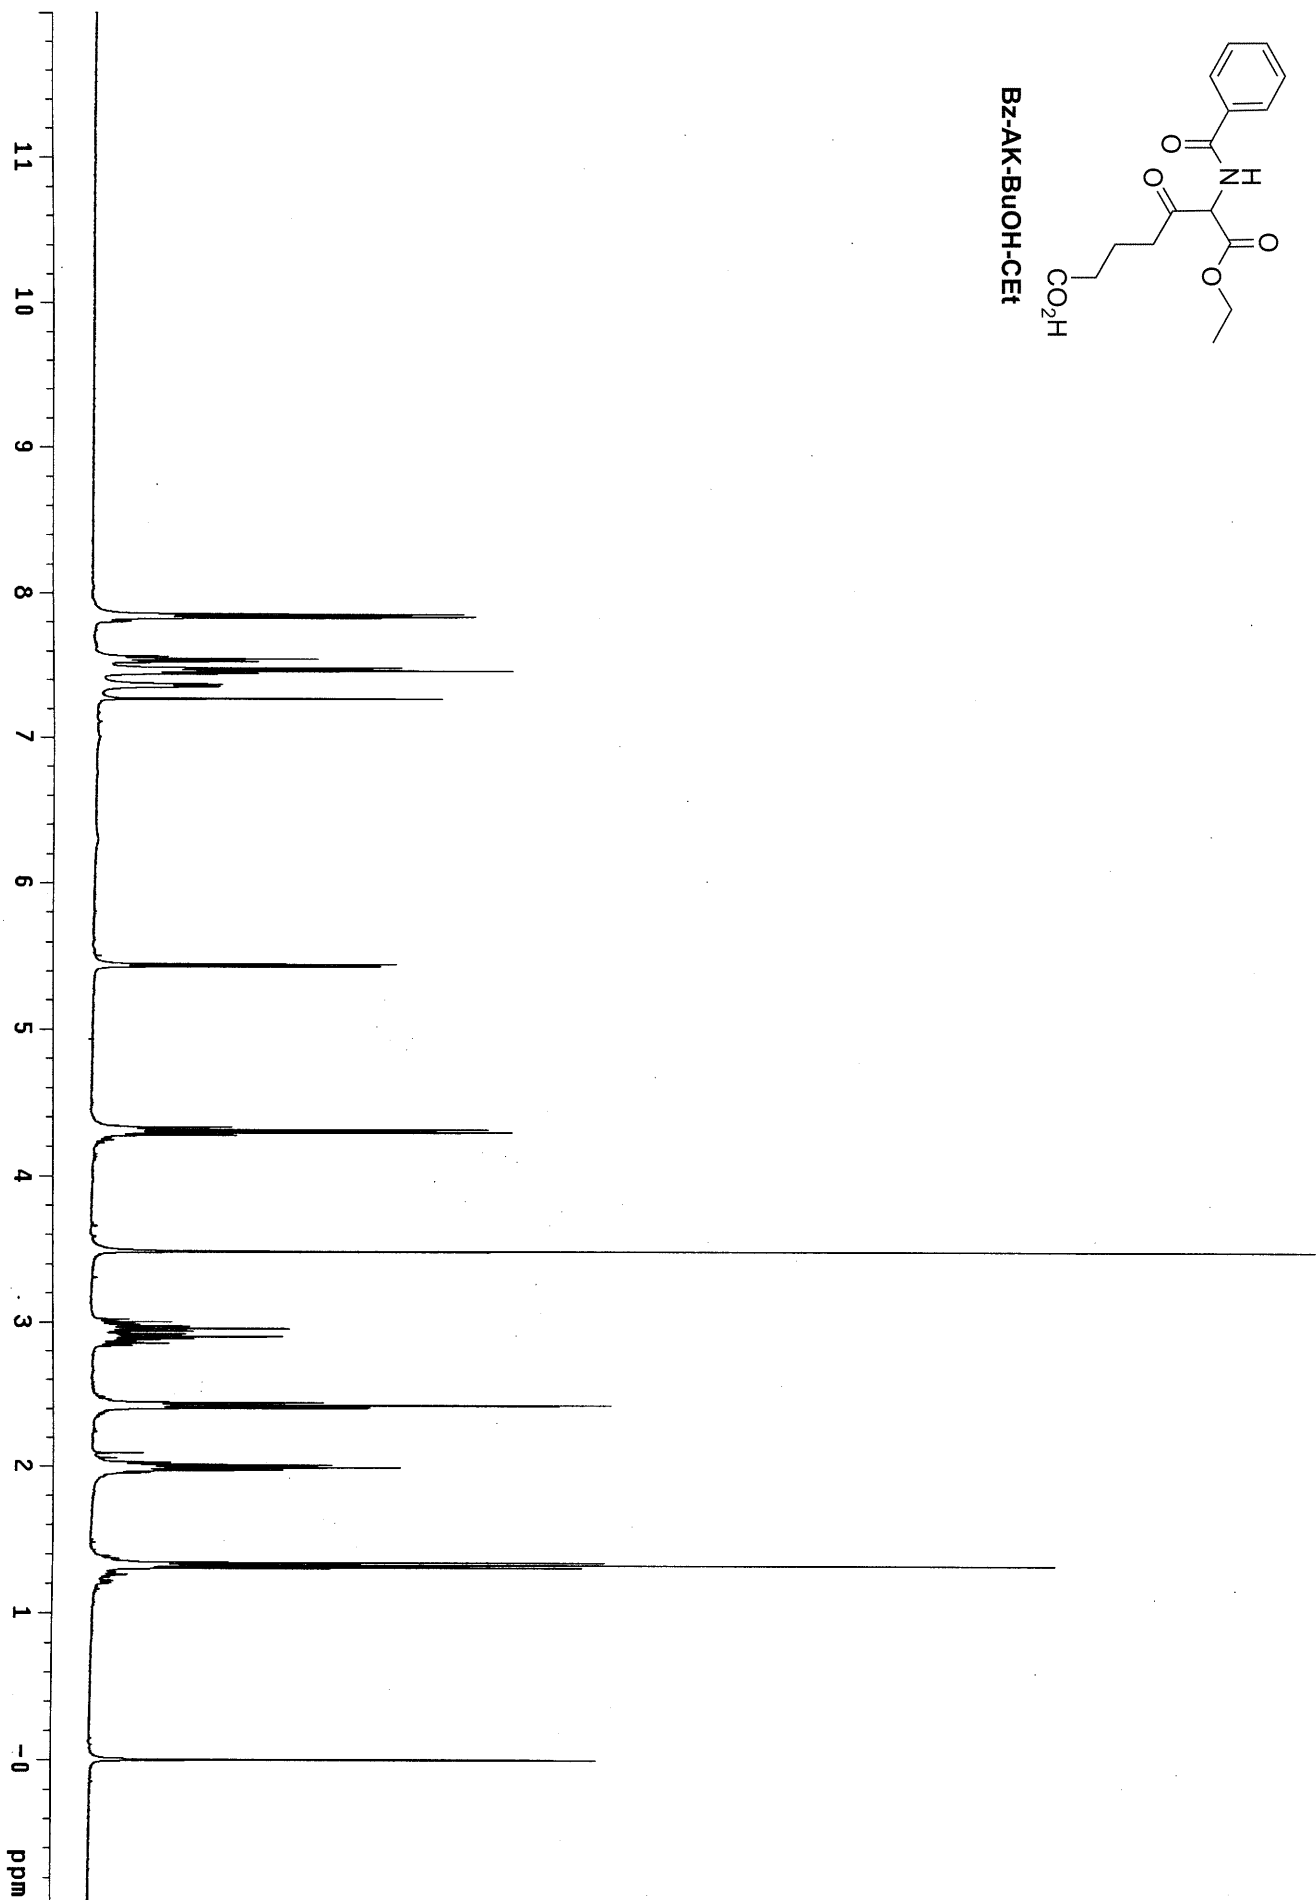

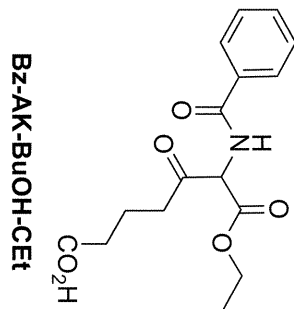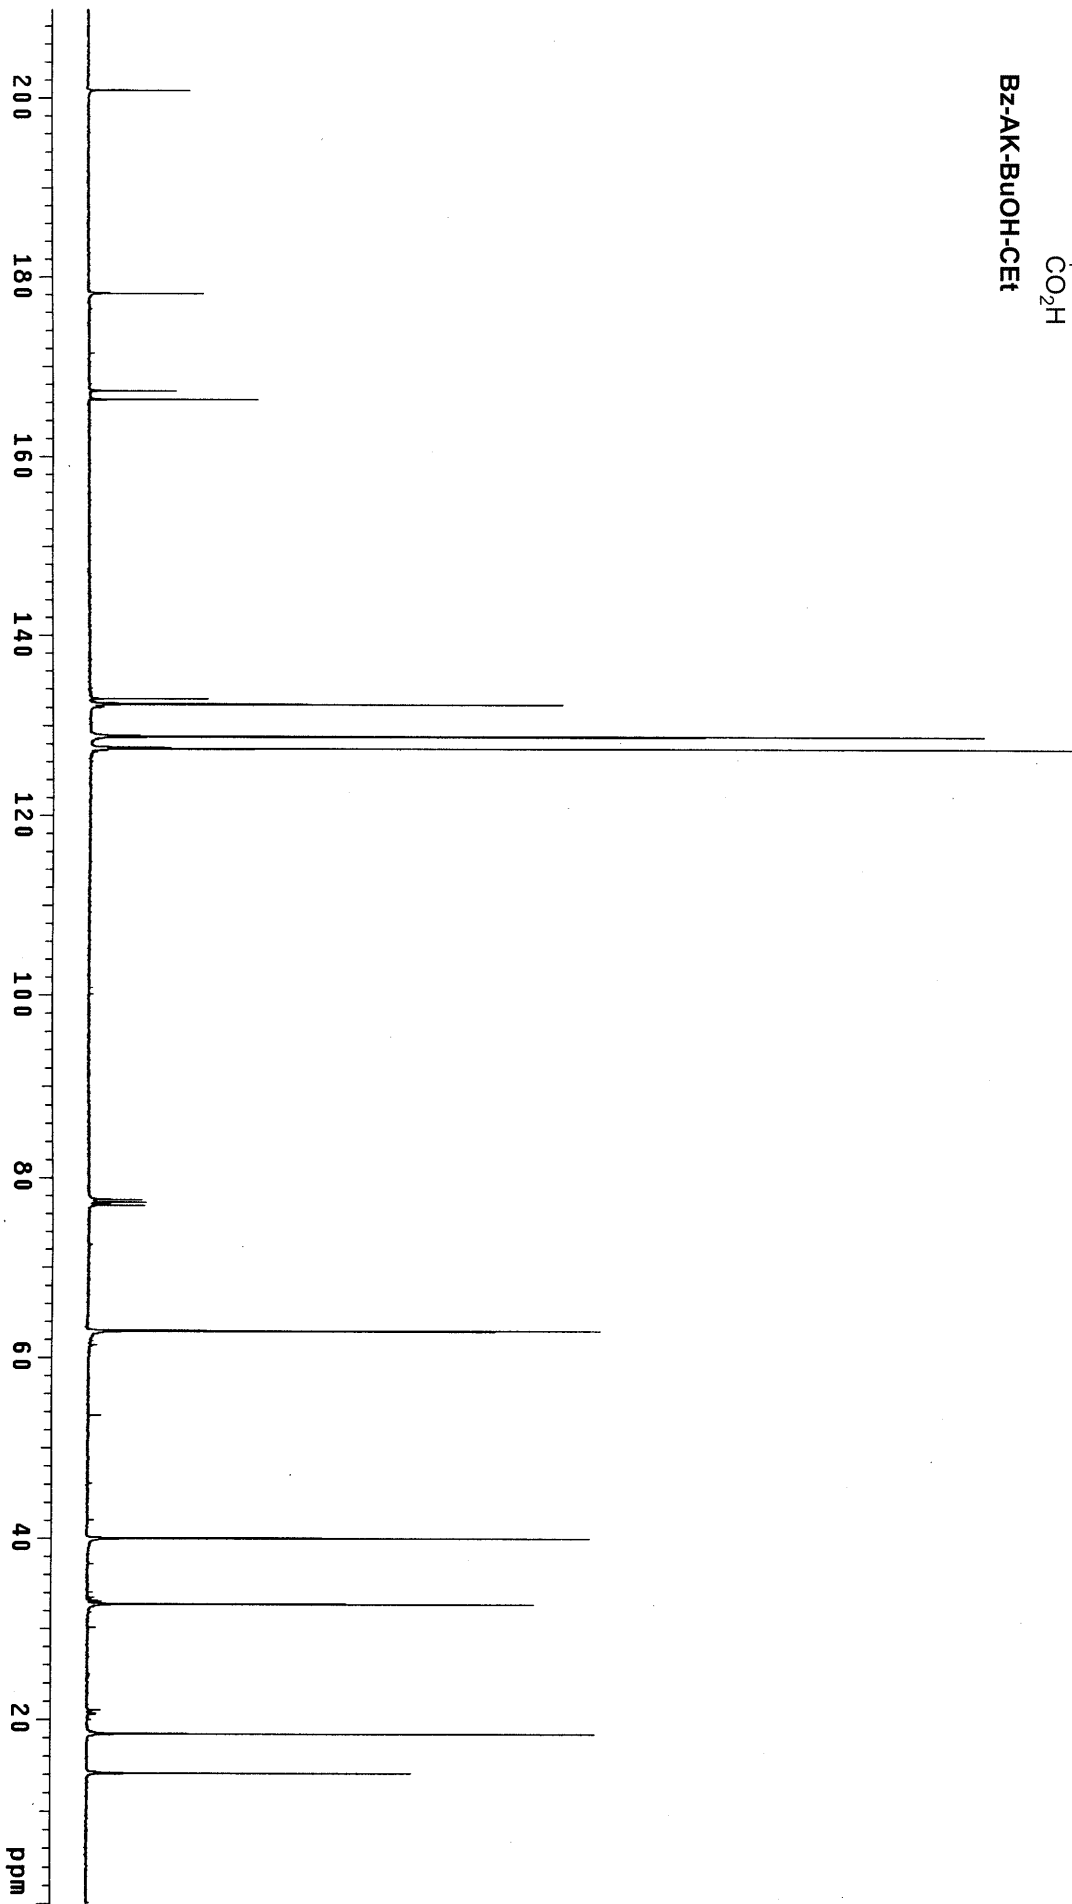

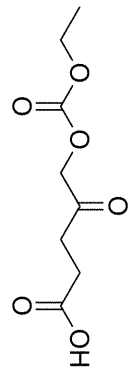

EtOCO<sub>2</sub>-3

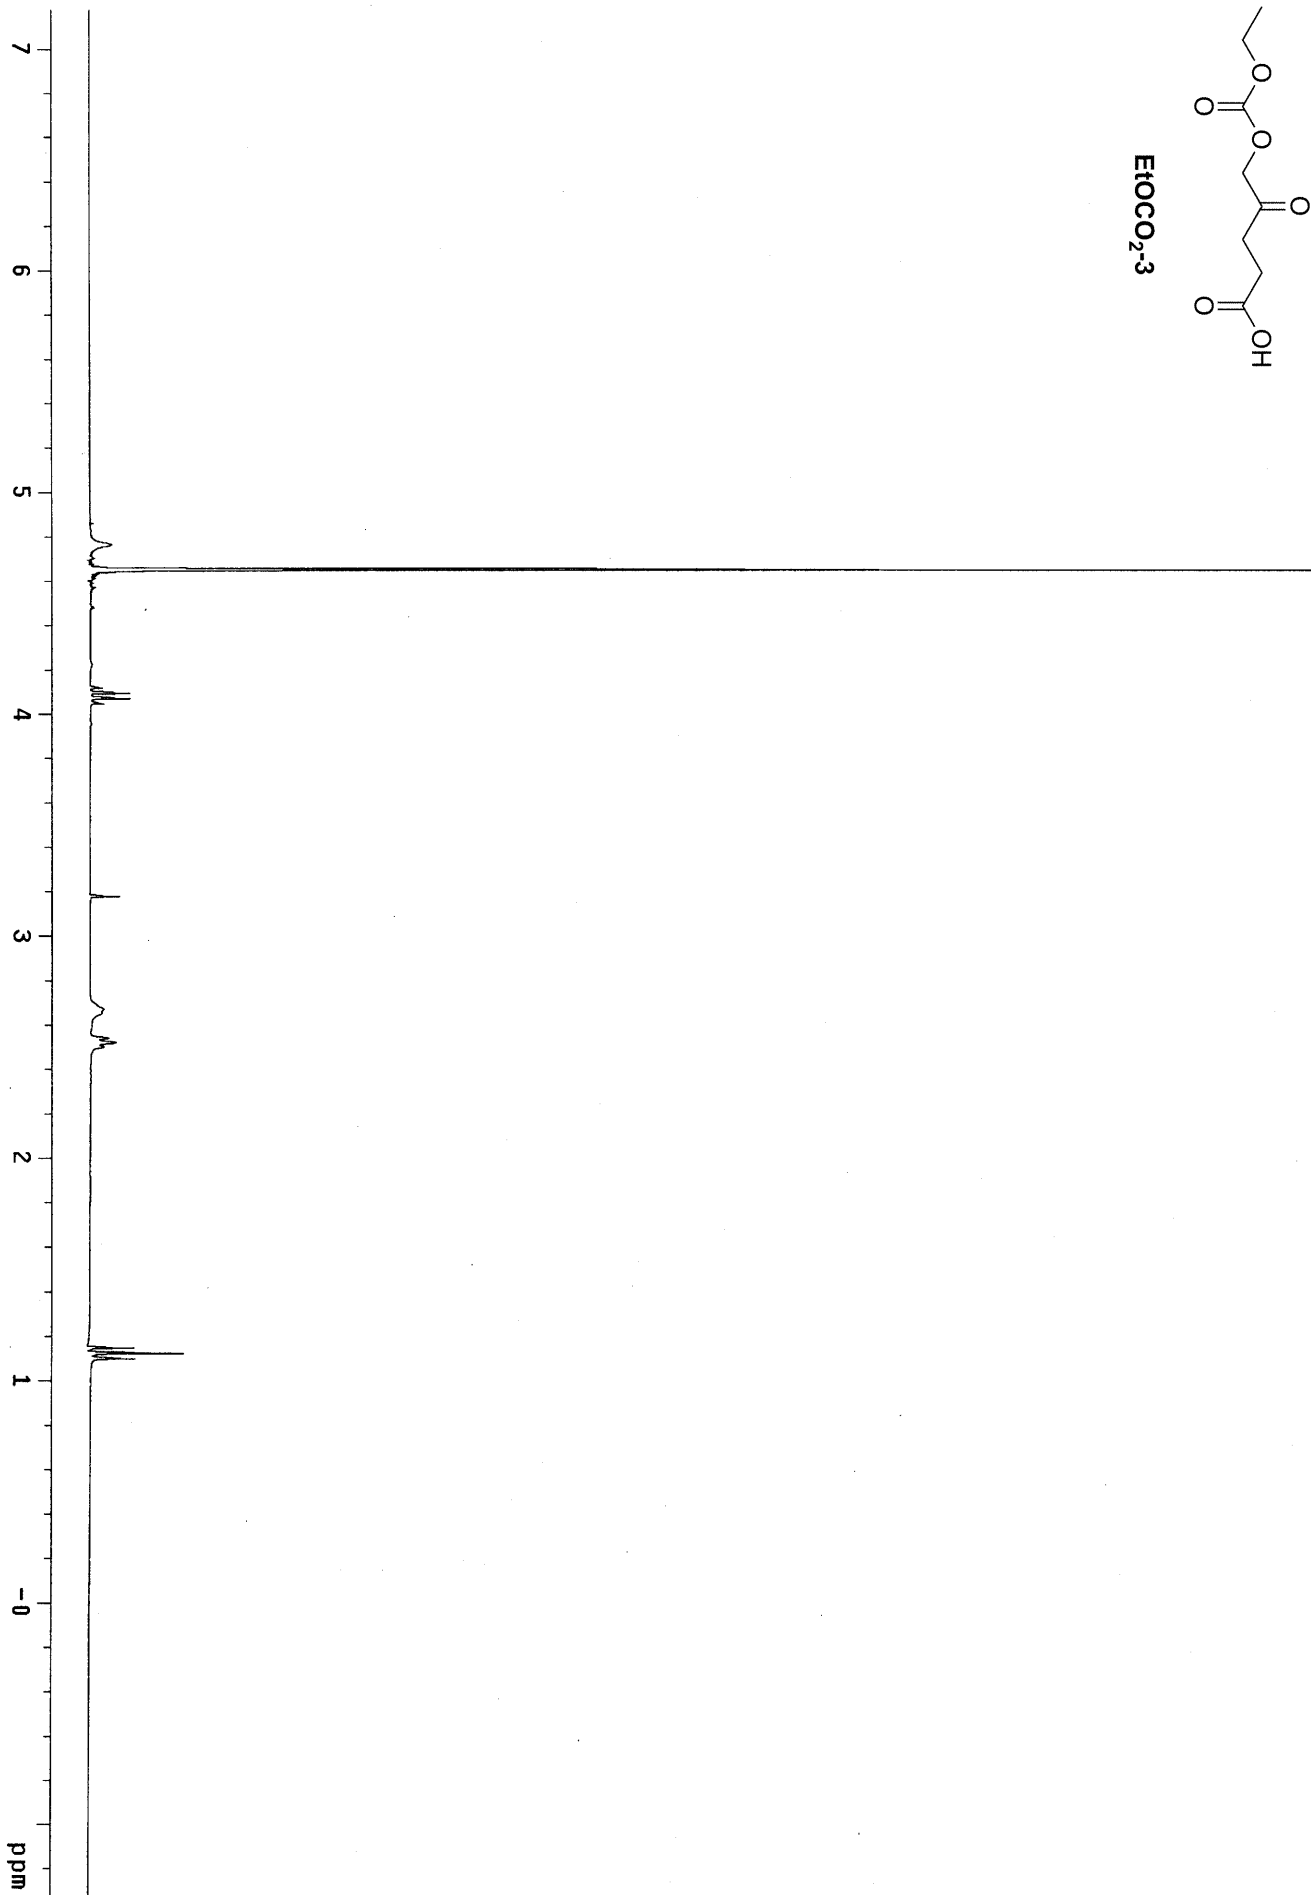

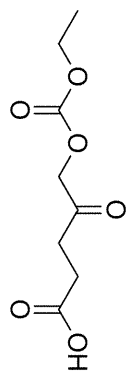

EtOCO<sub>2</sub>:3

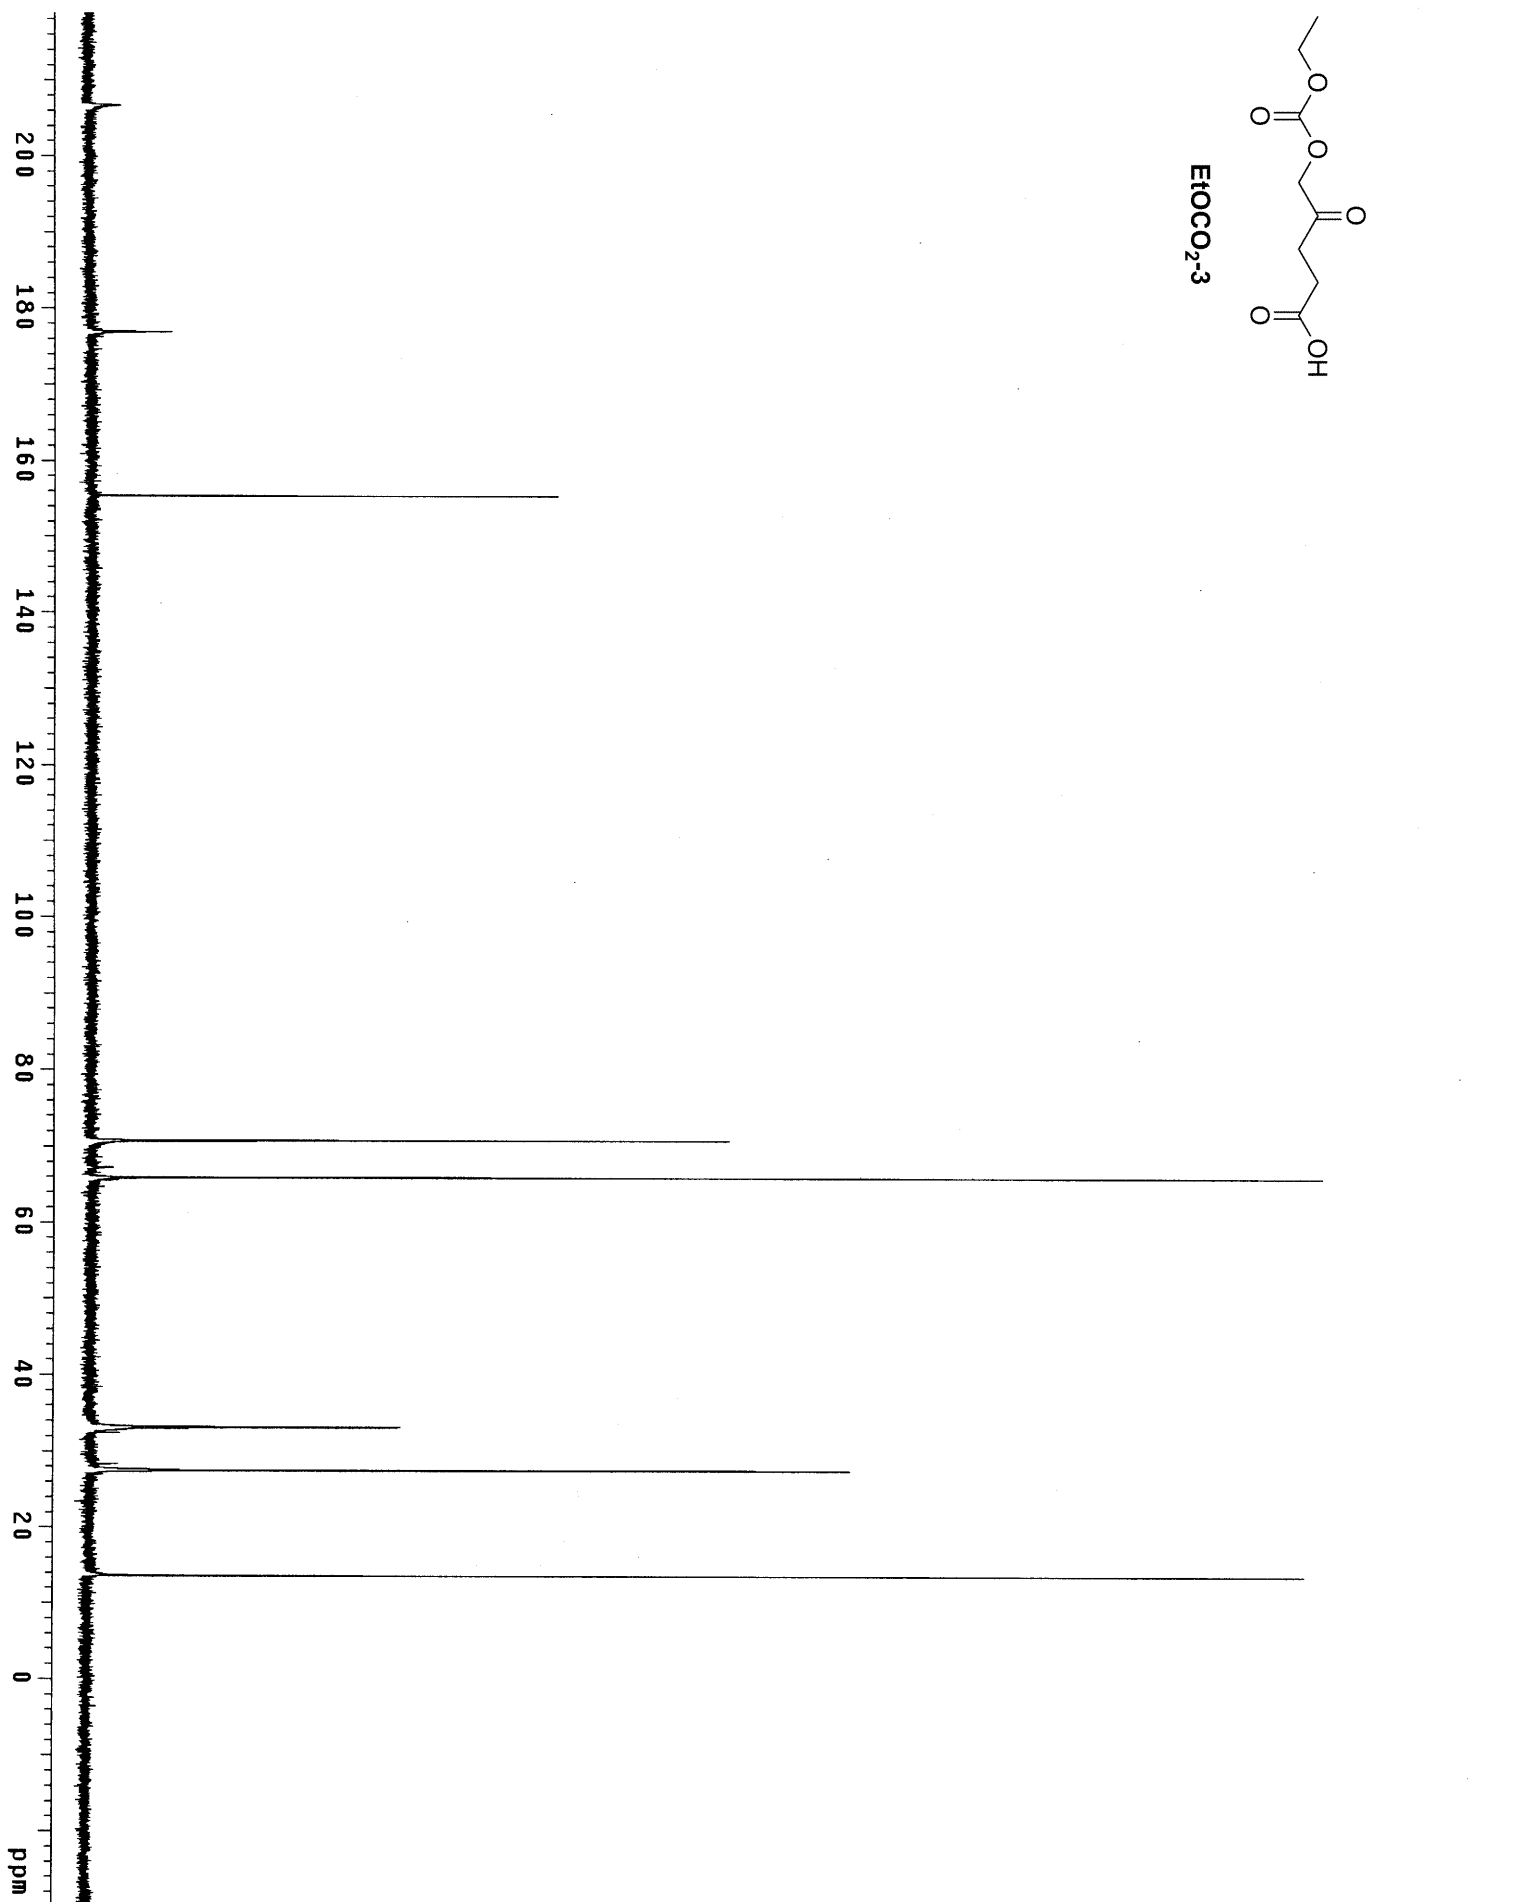

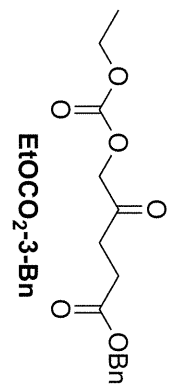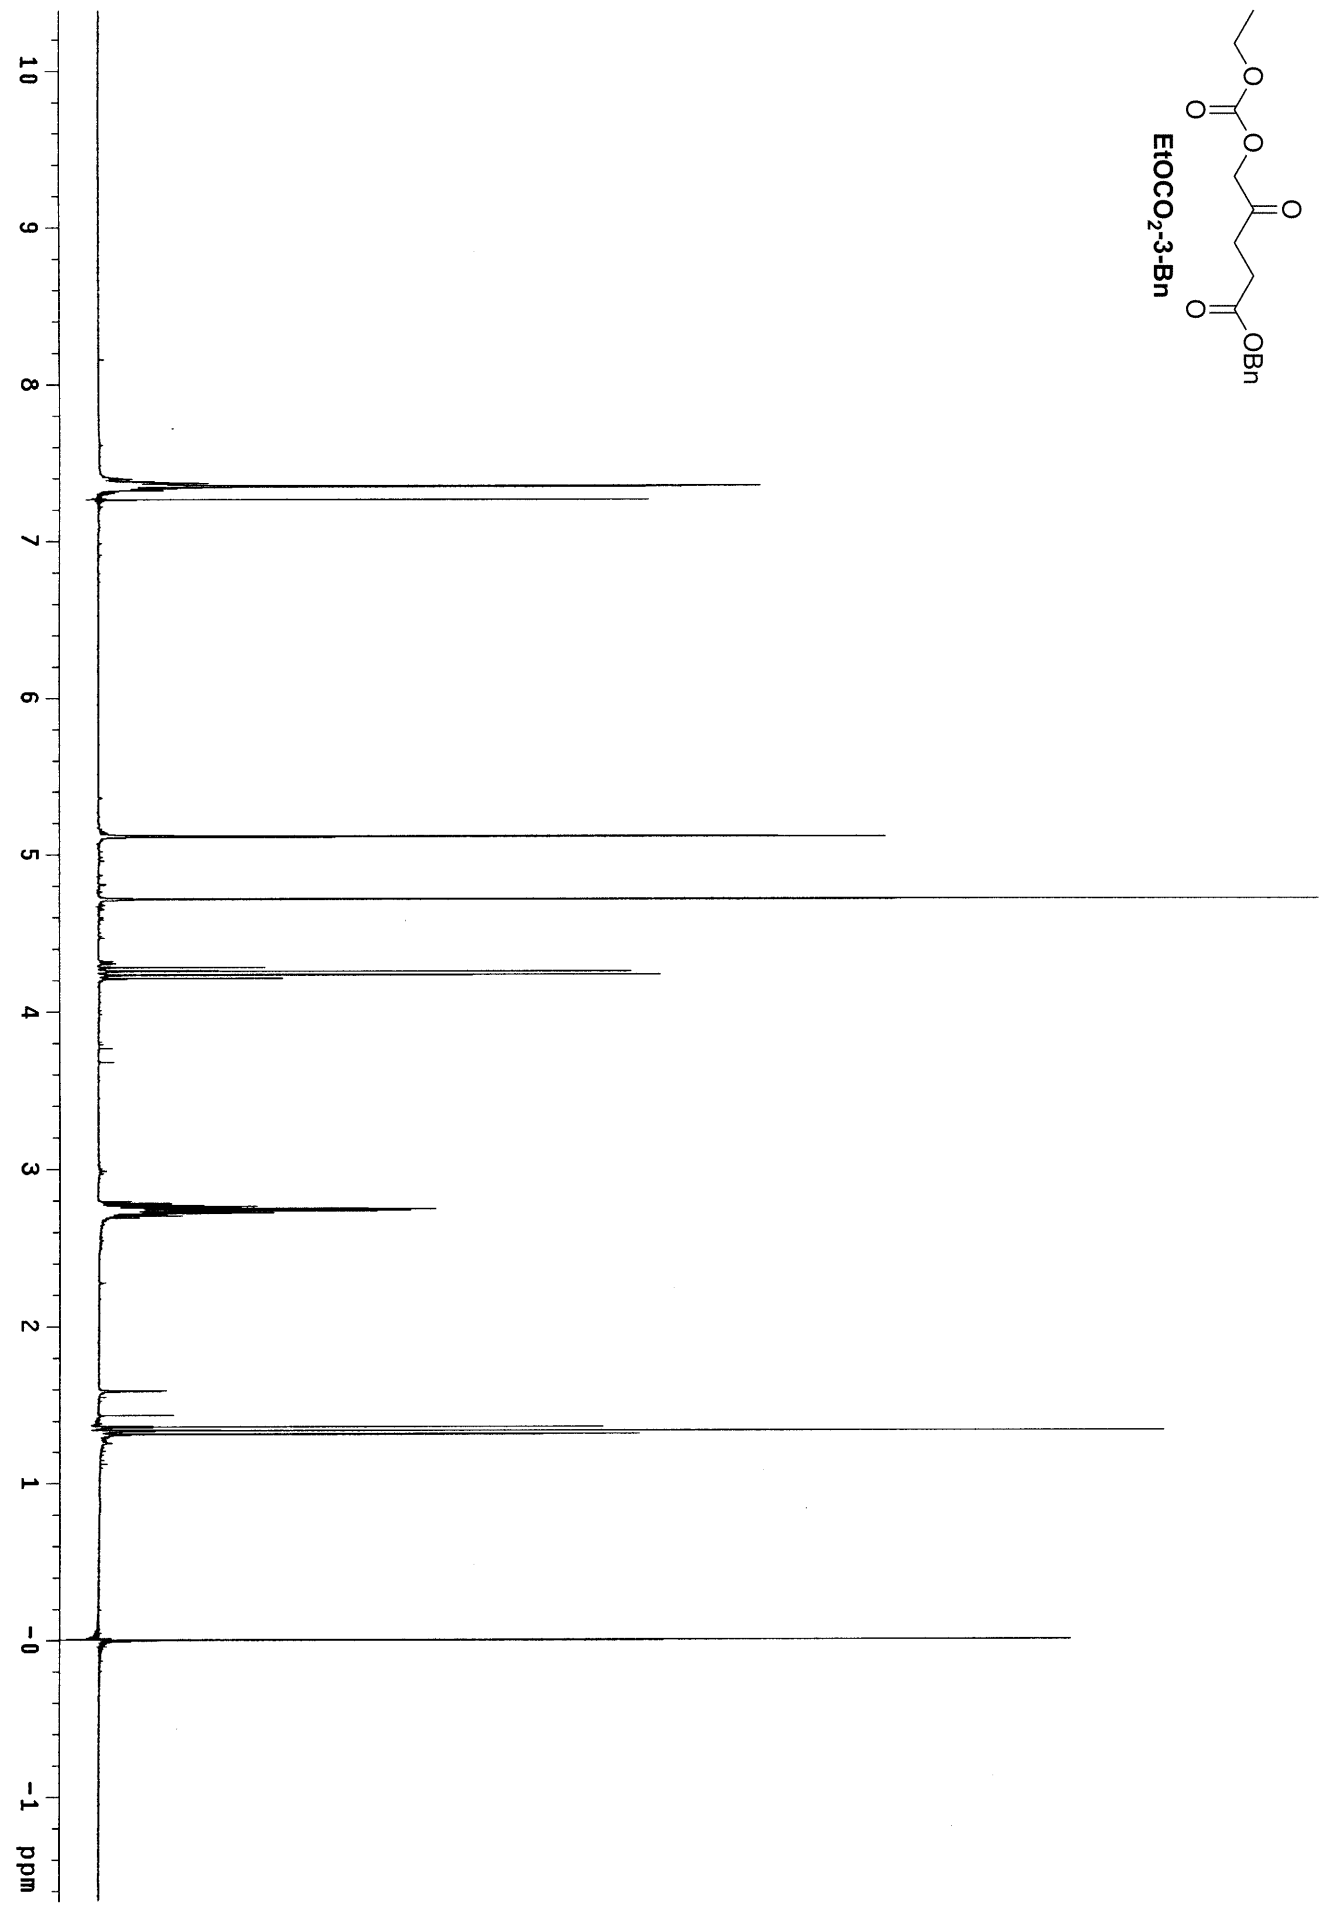

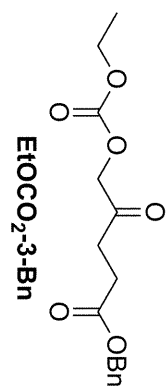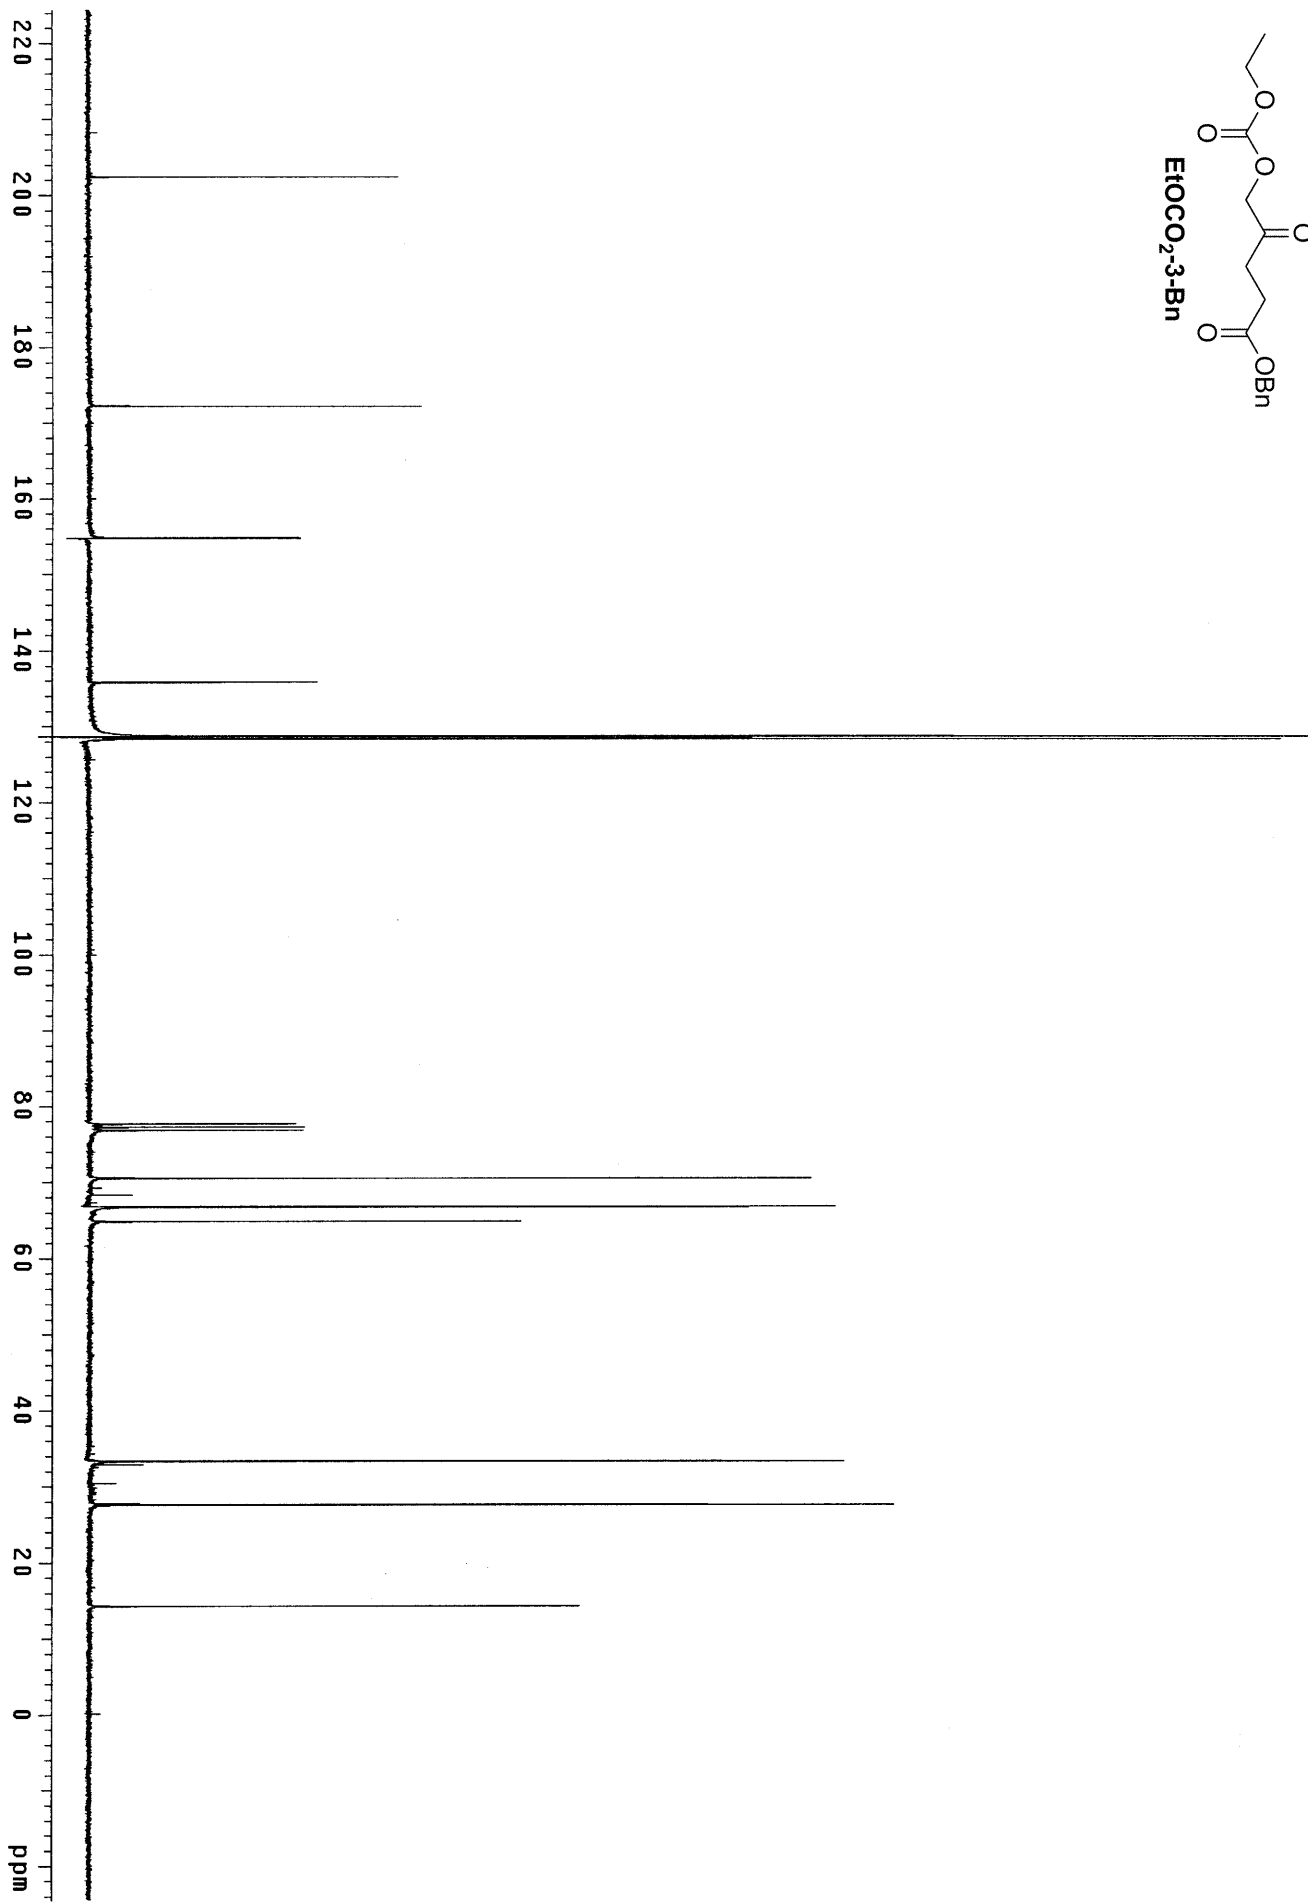

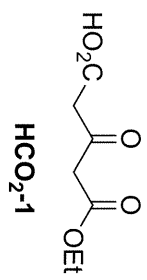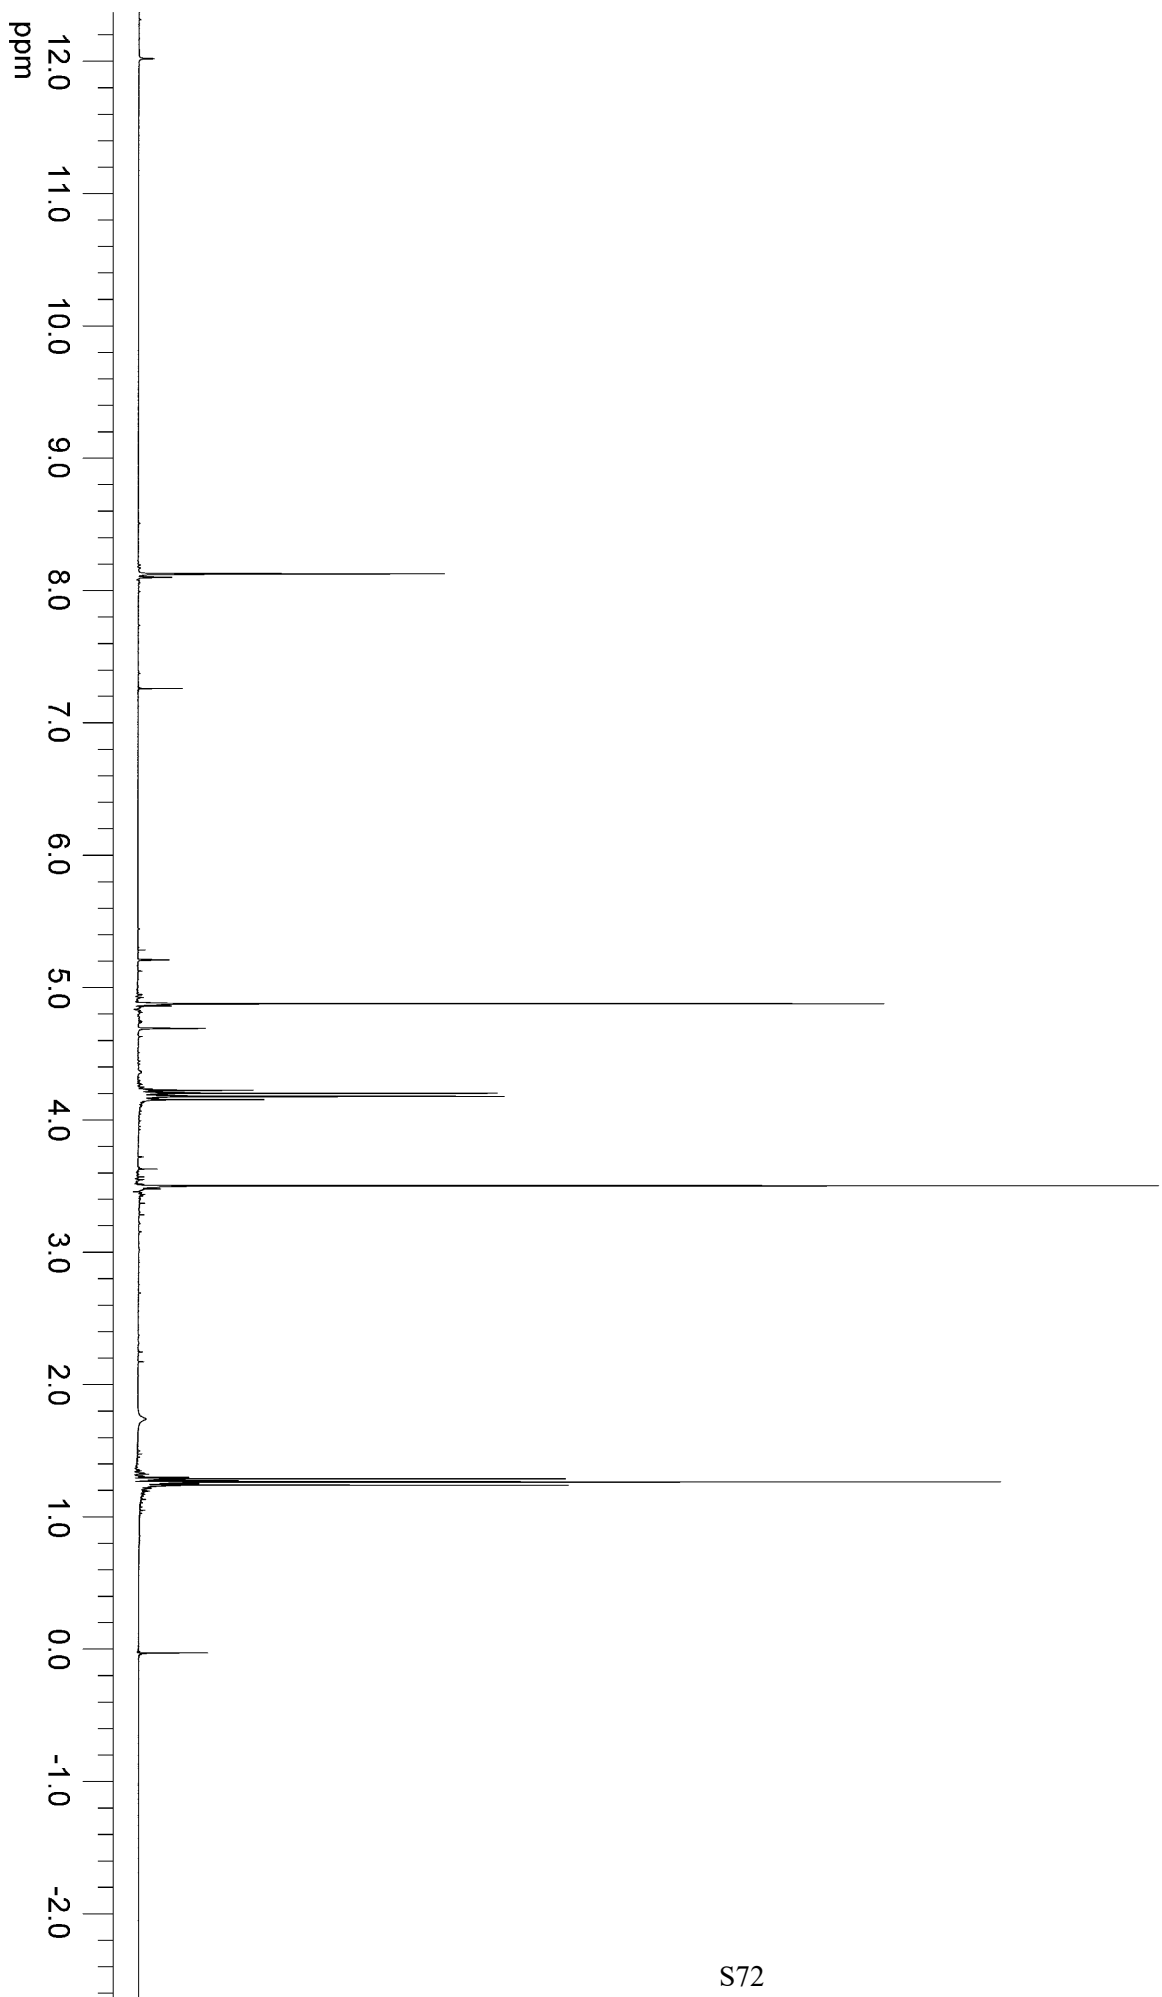



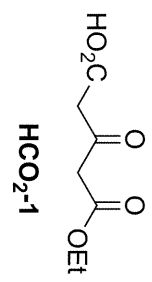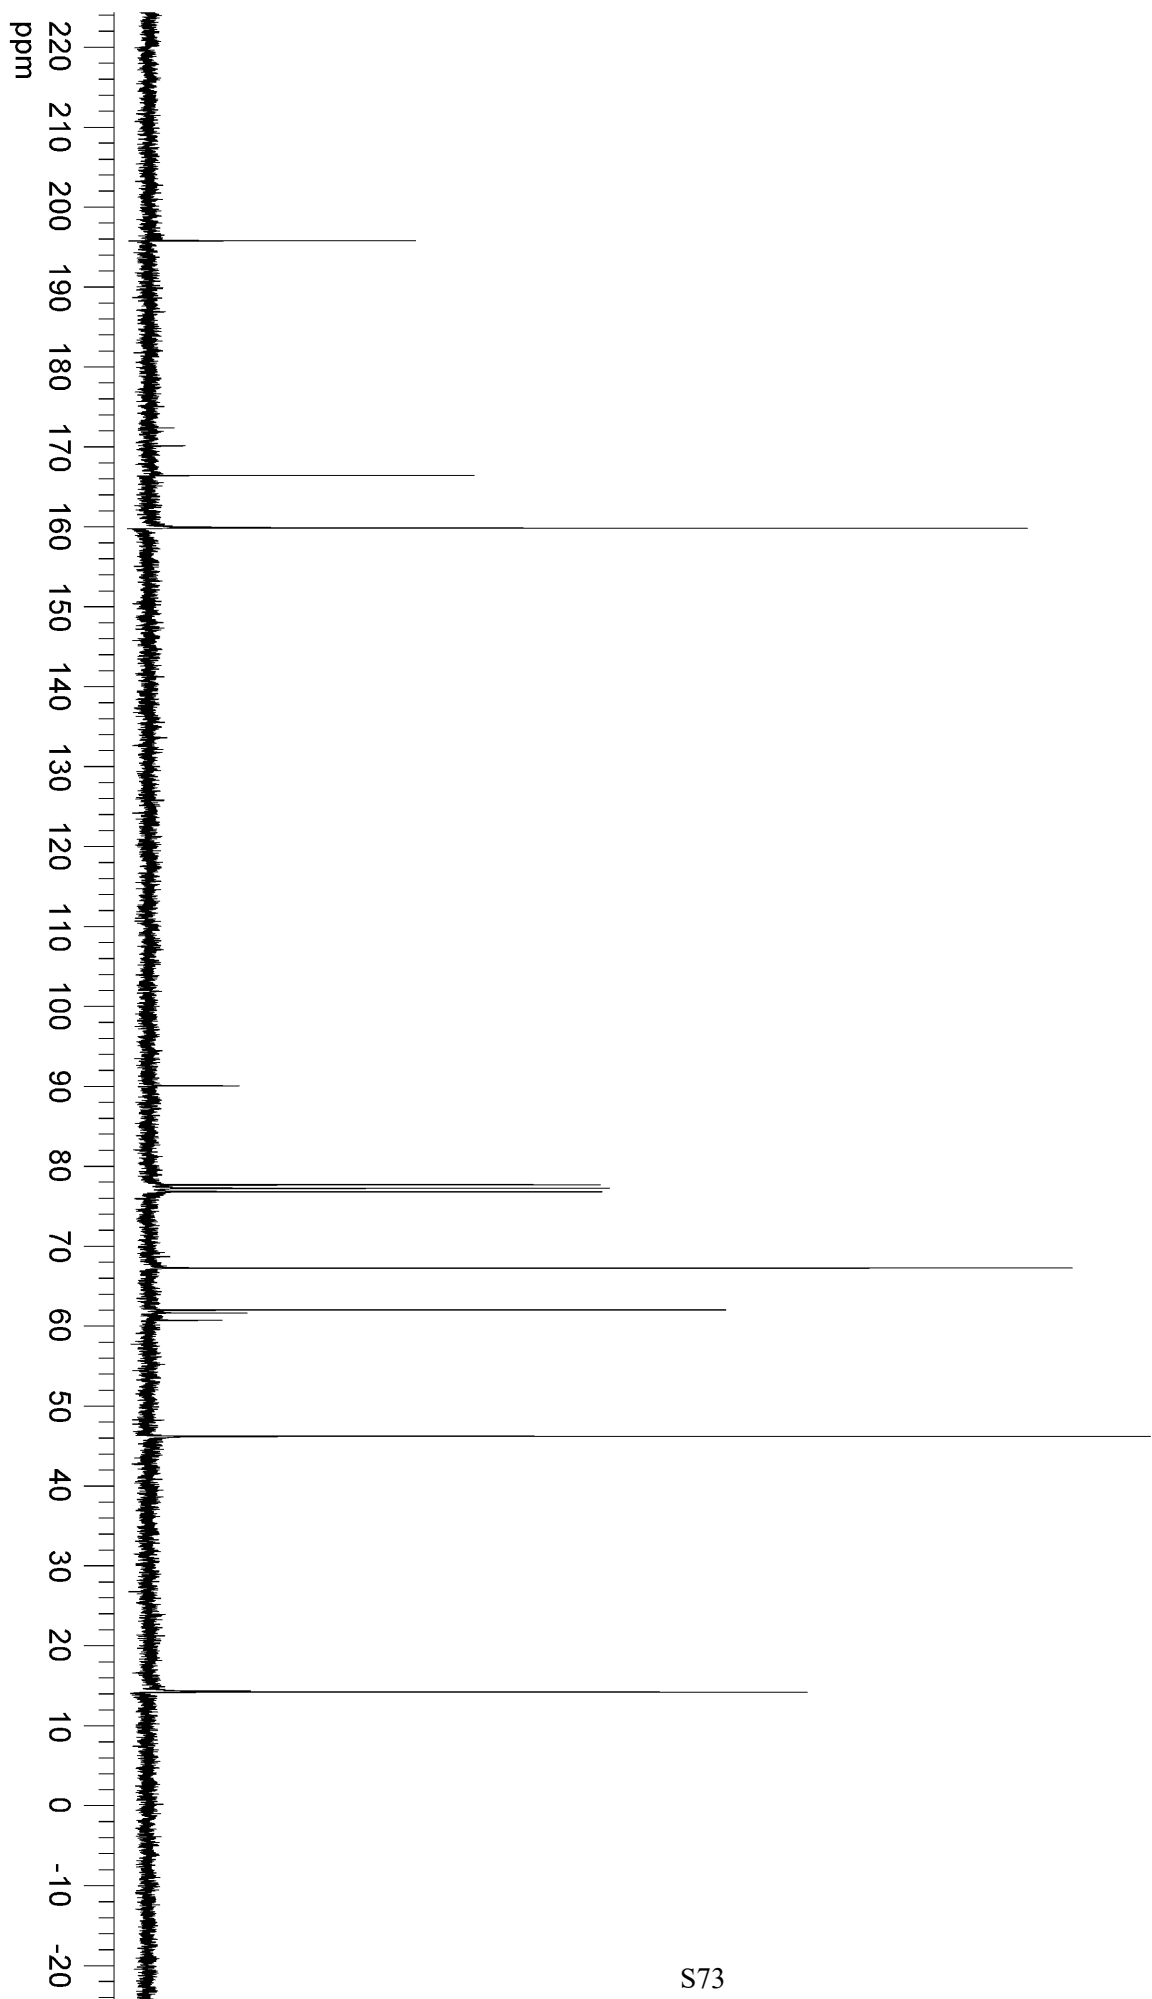

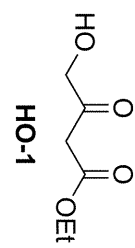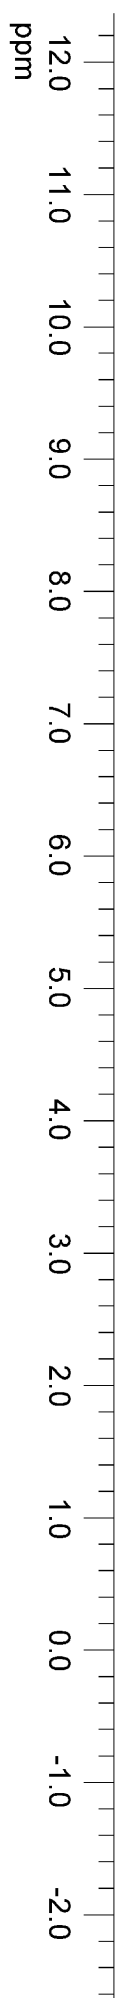

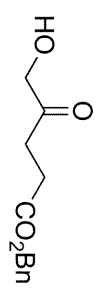

HO-3-Bn

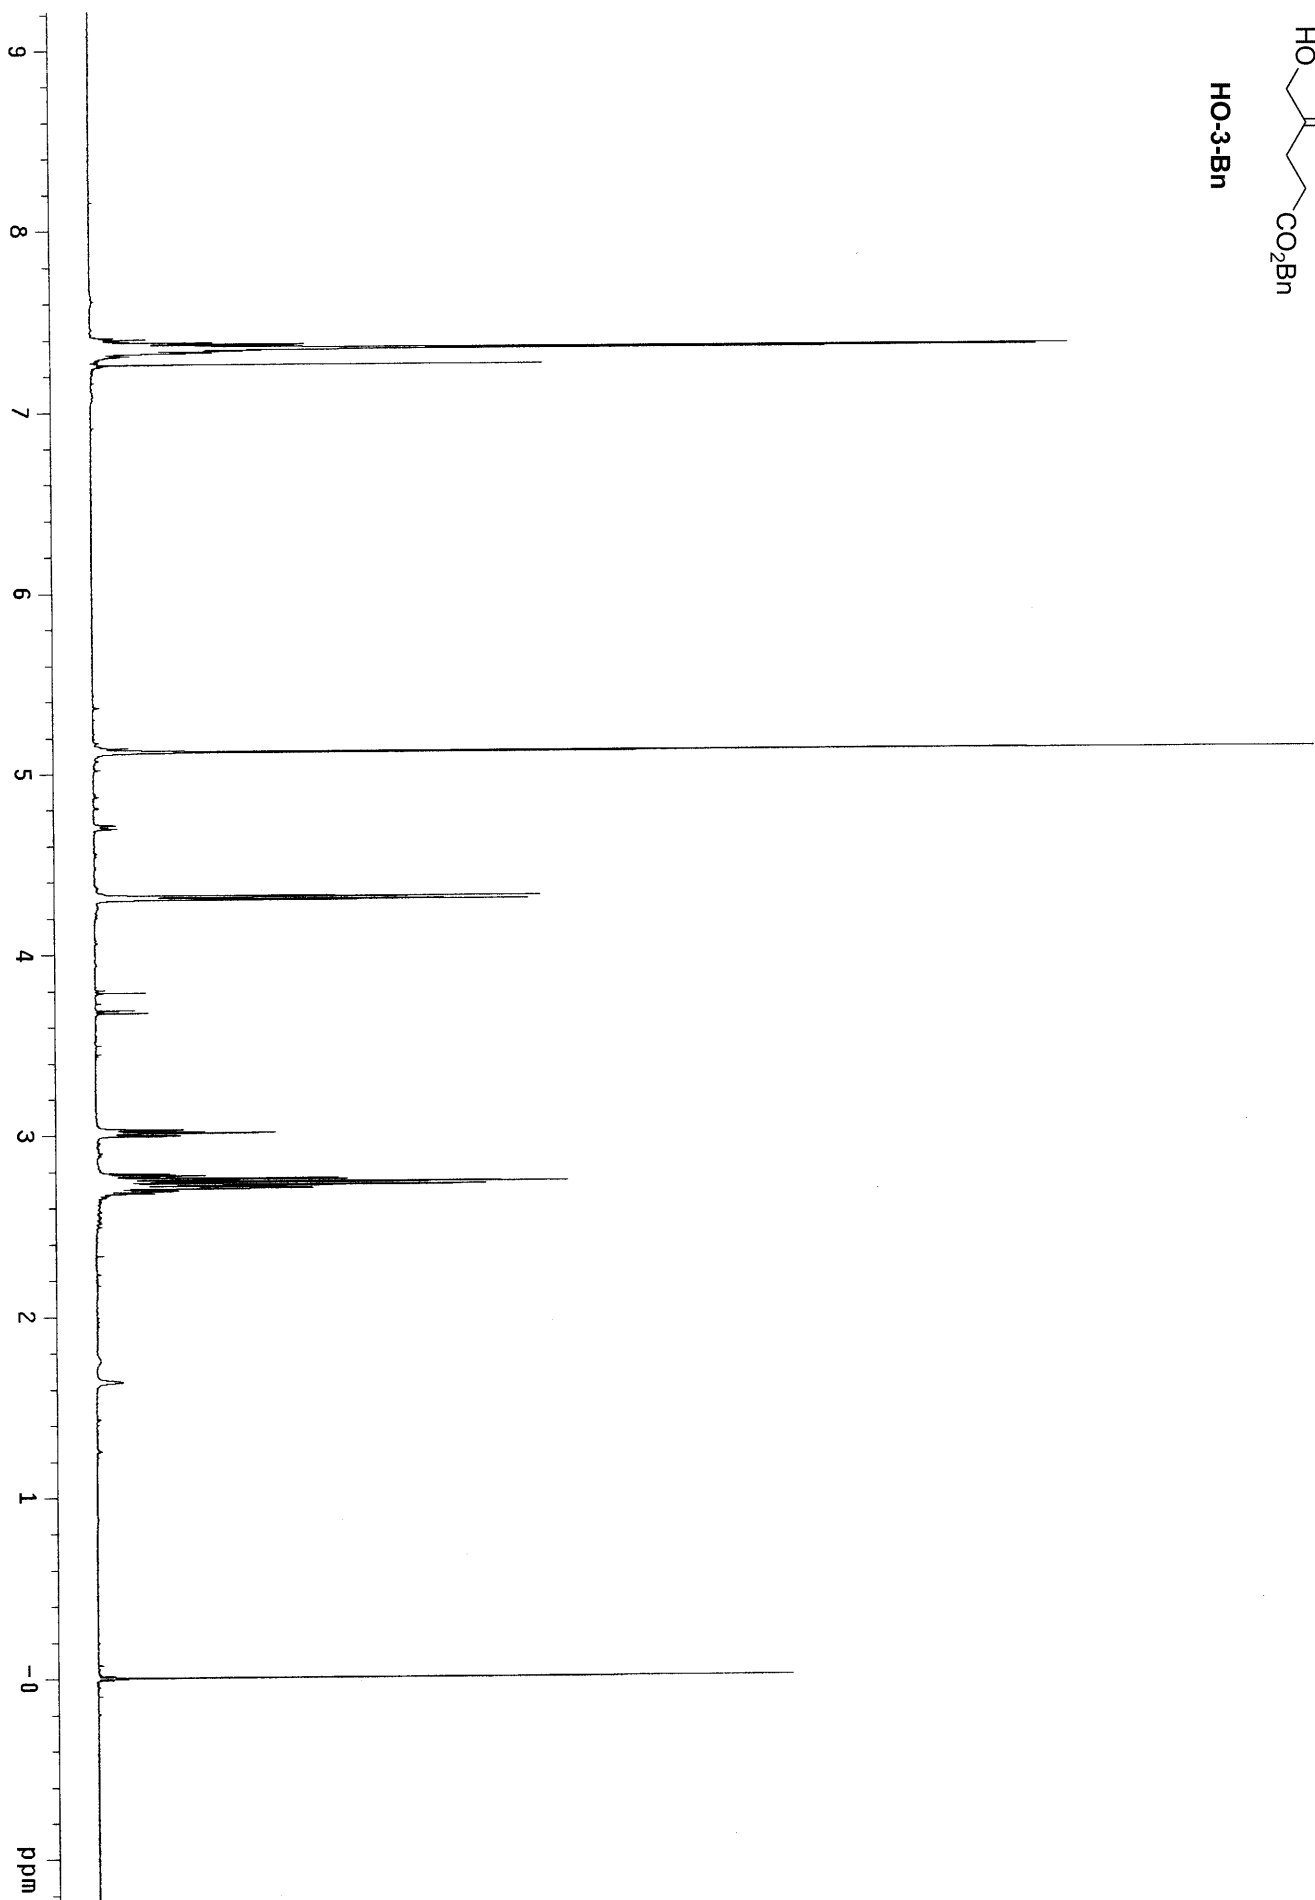

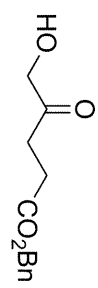

HO-3-Bn

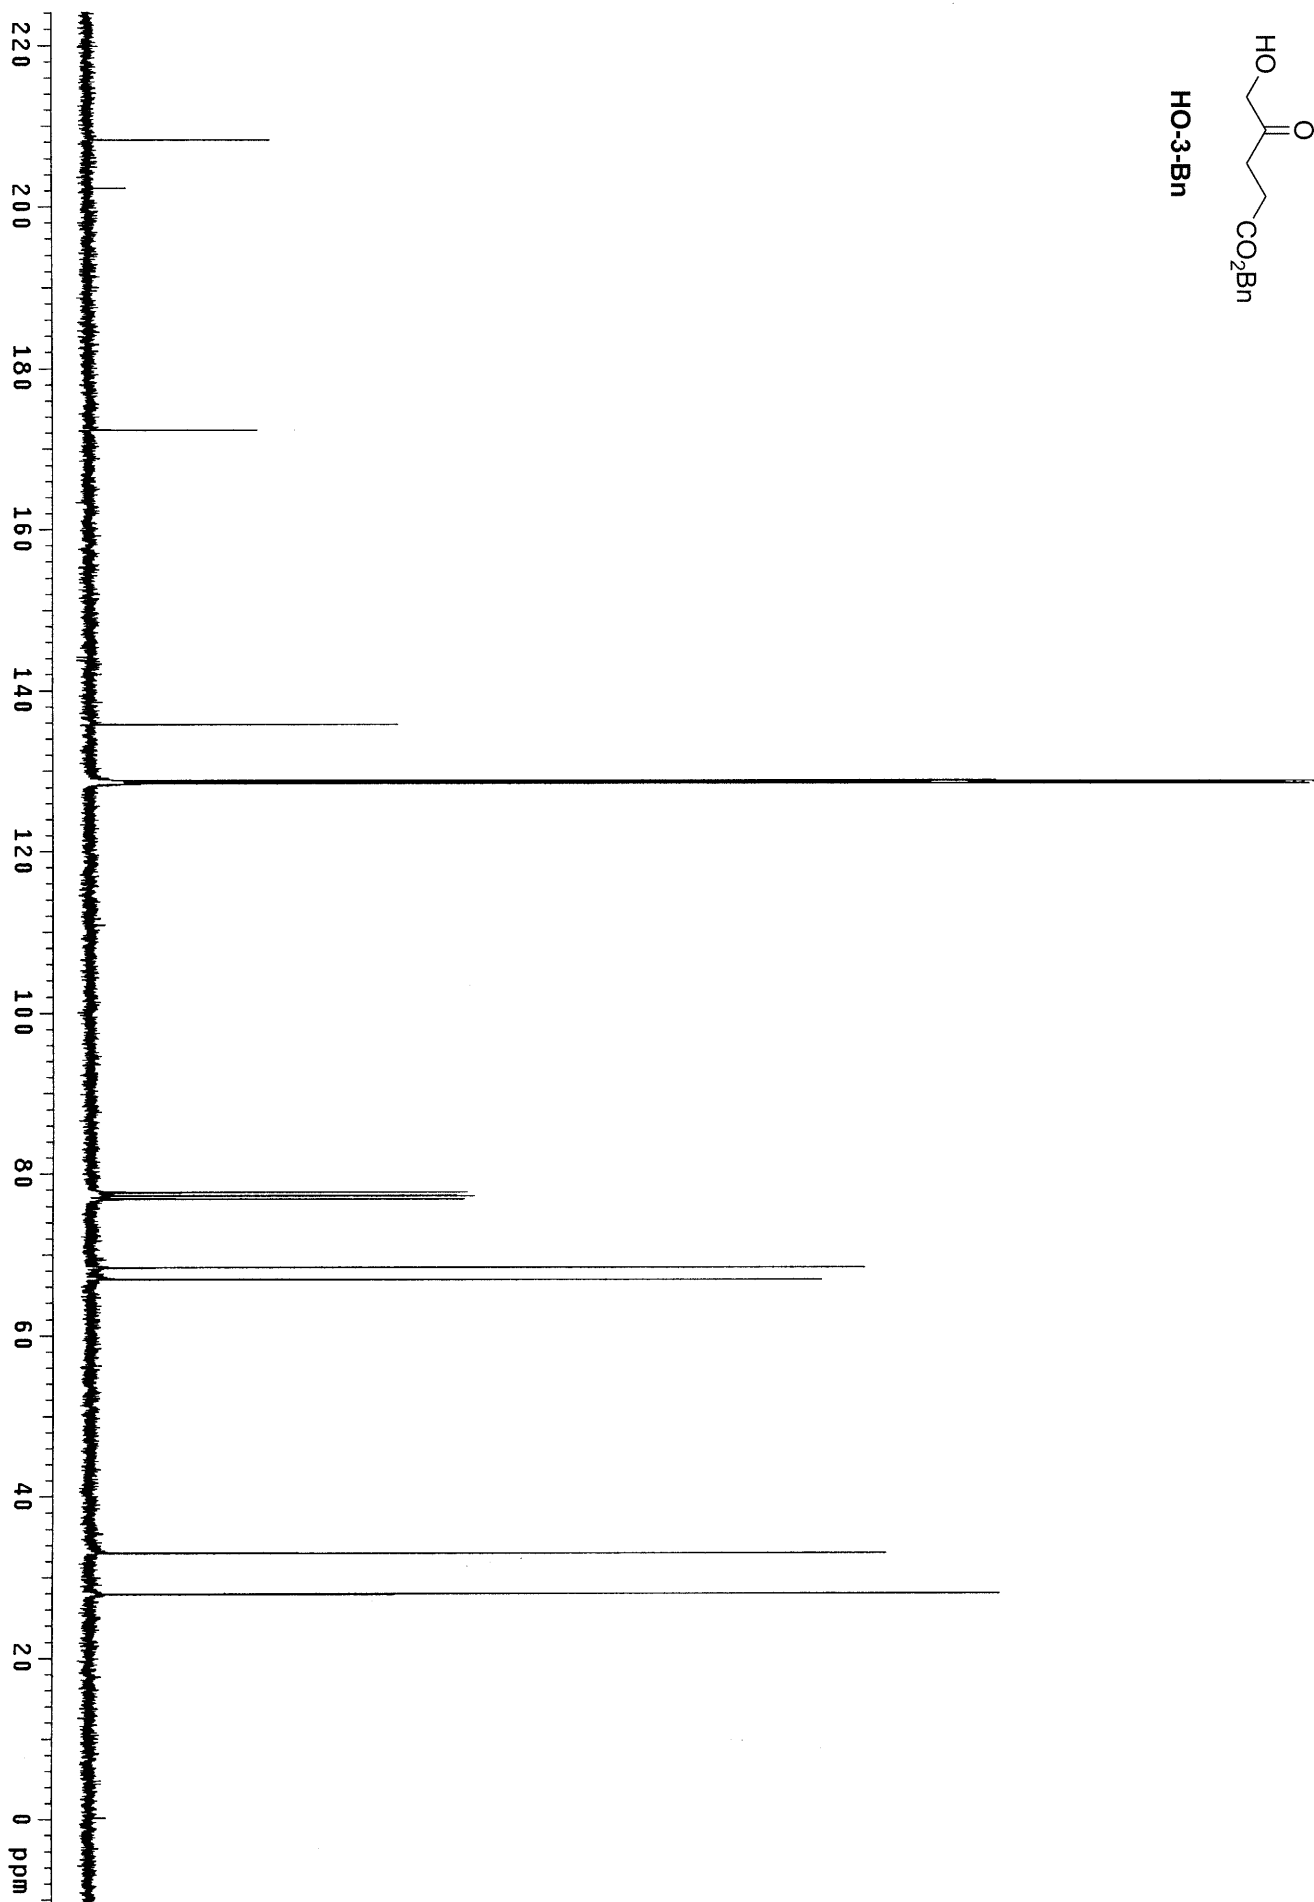

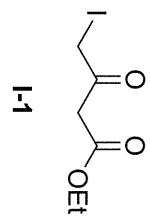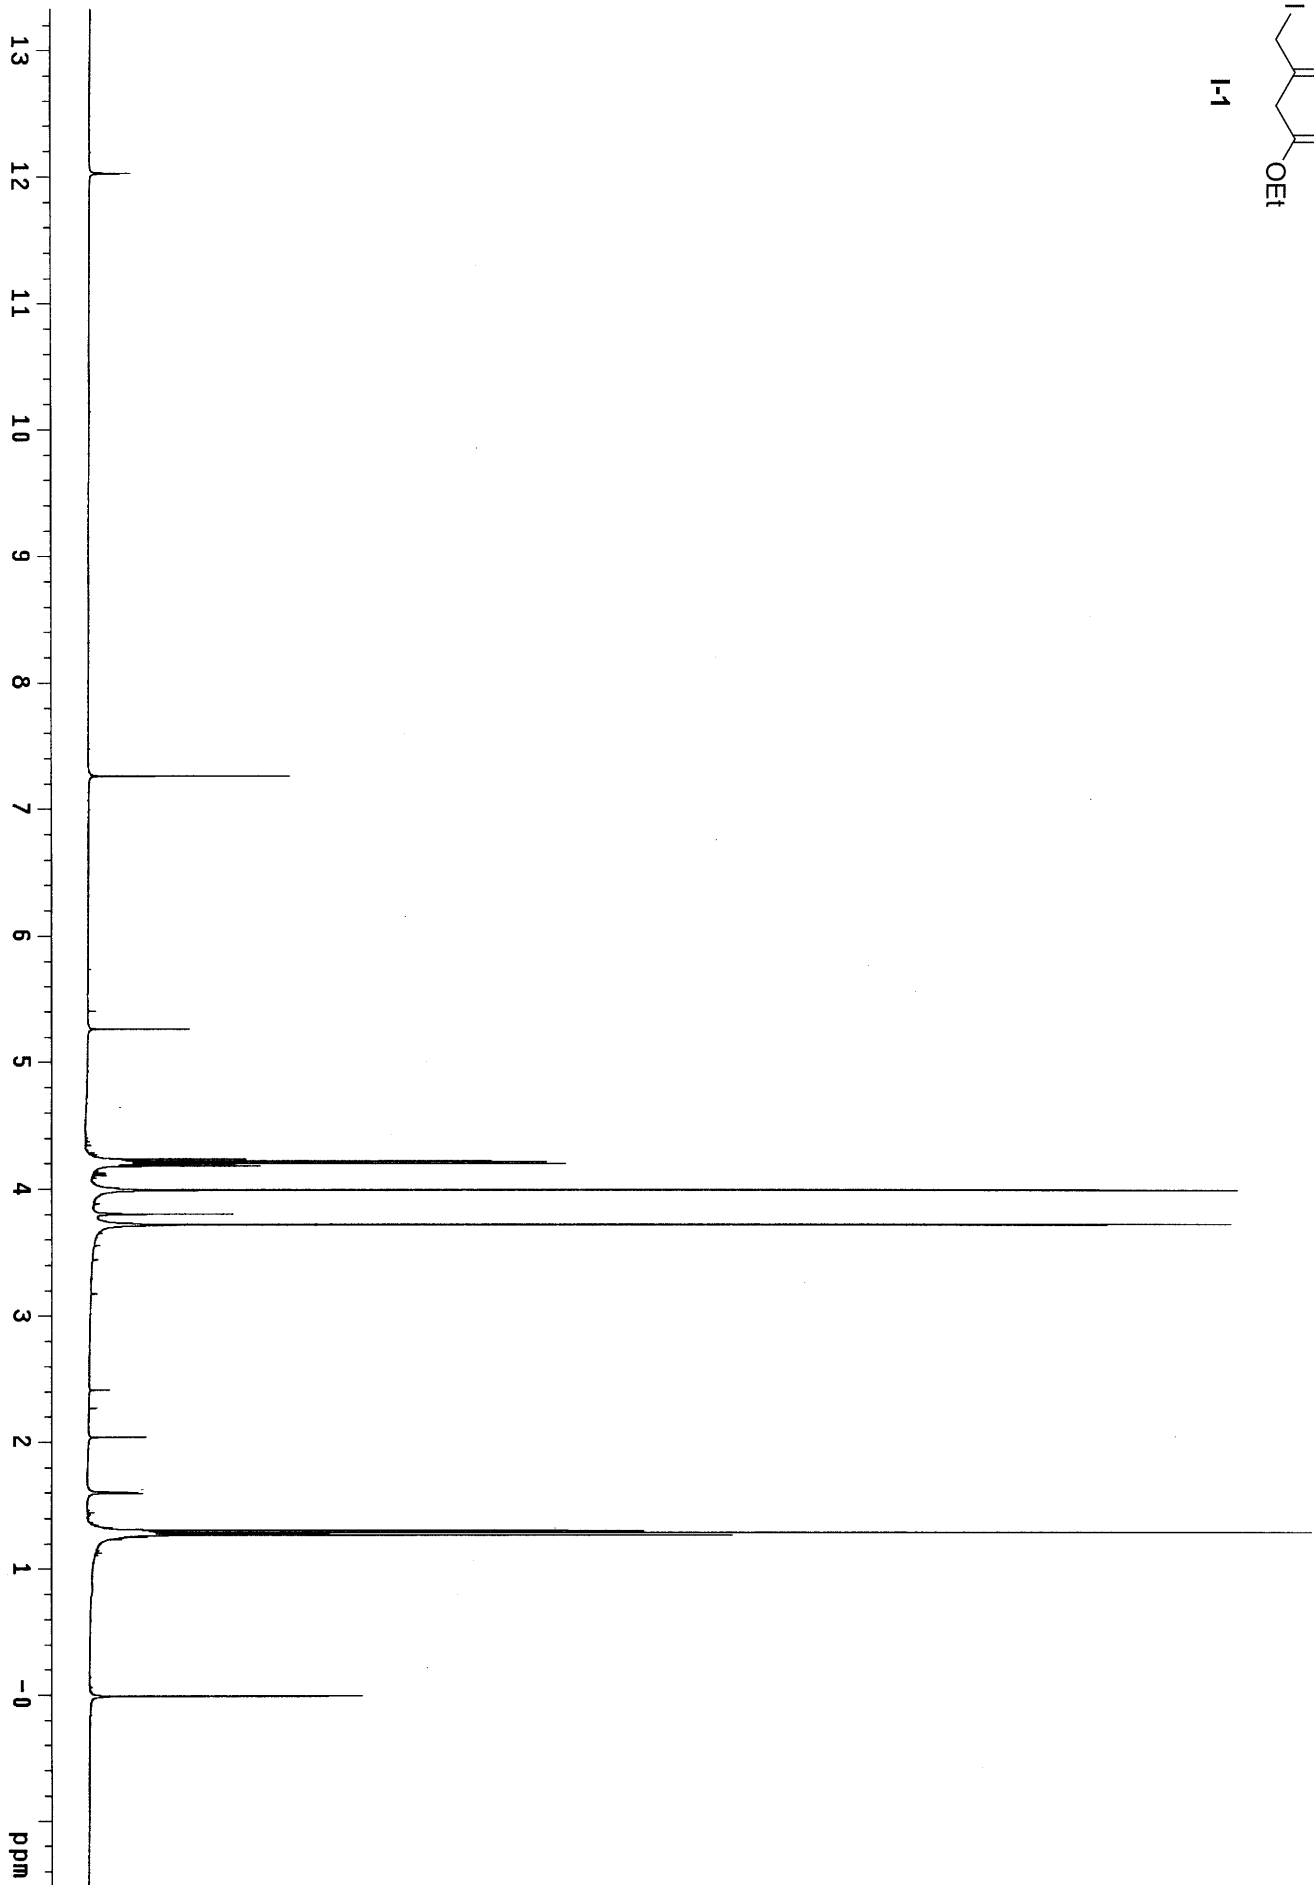

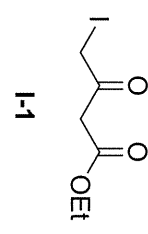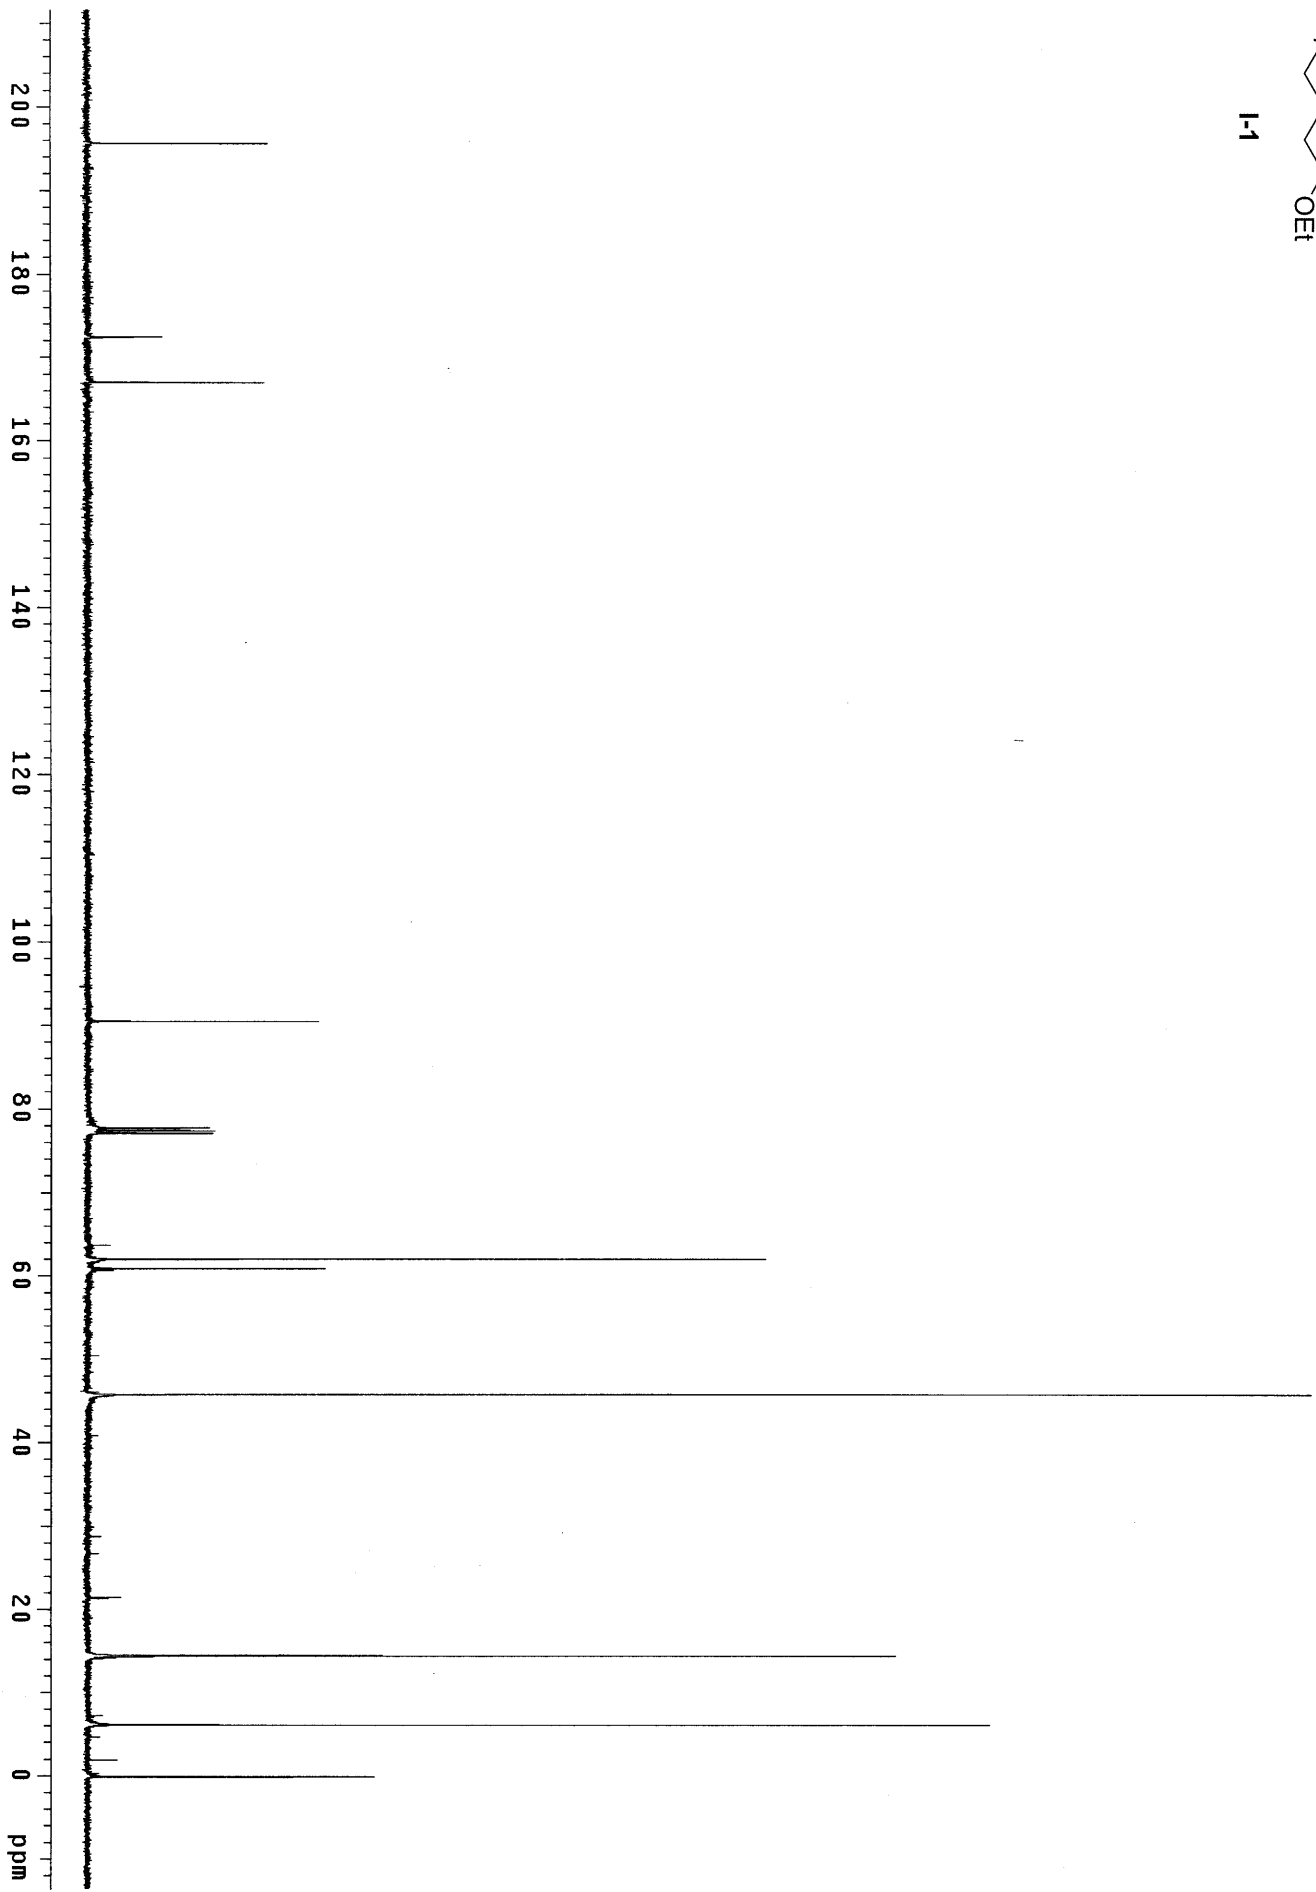

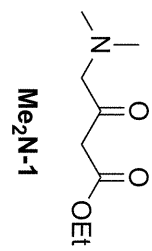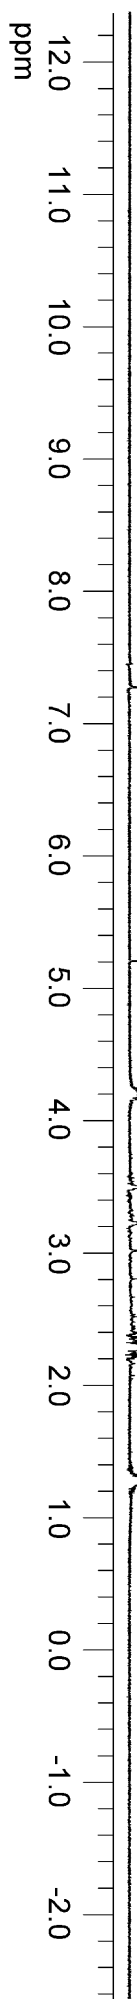

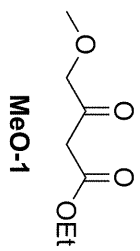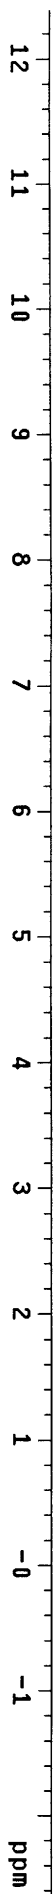



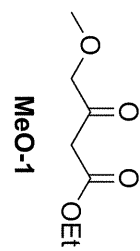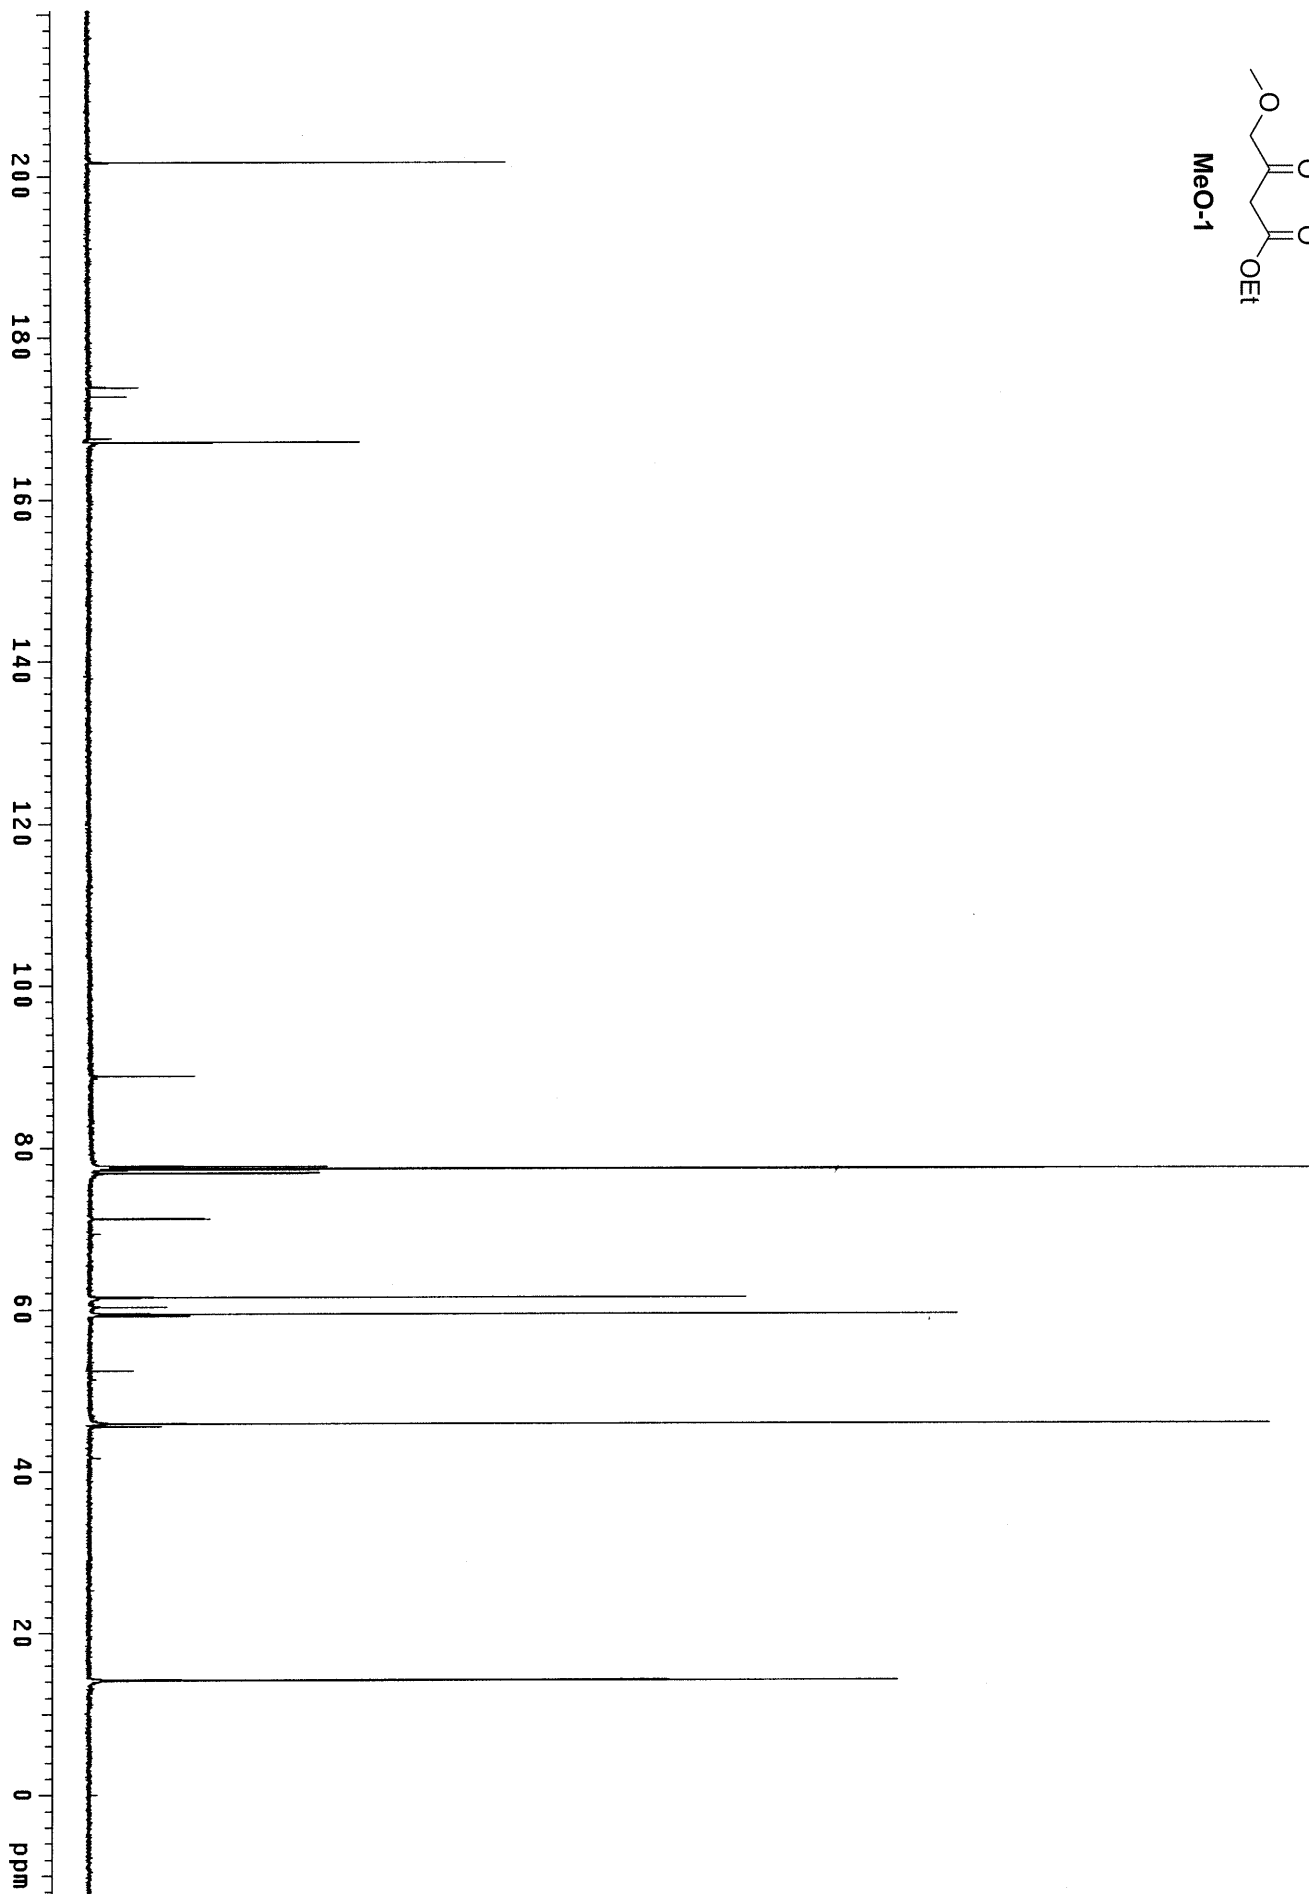

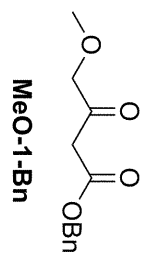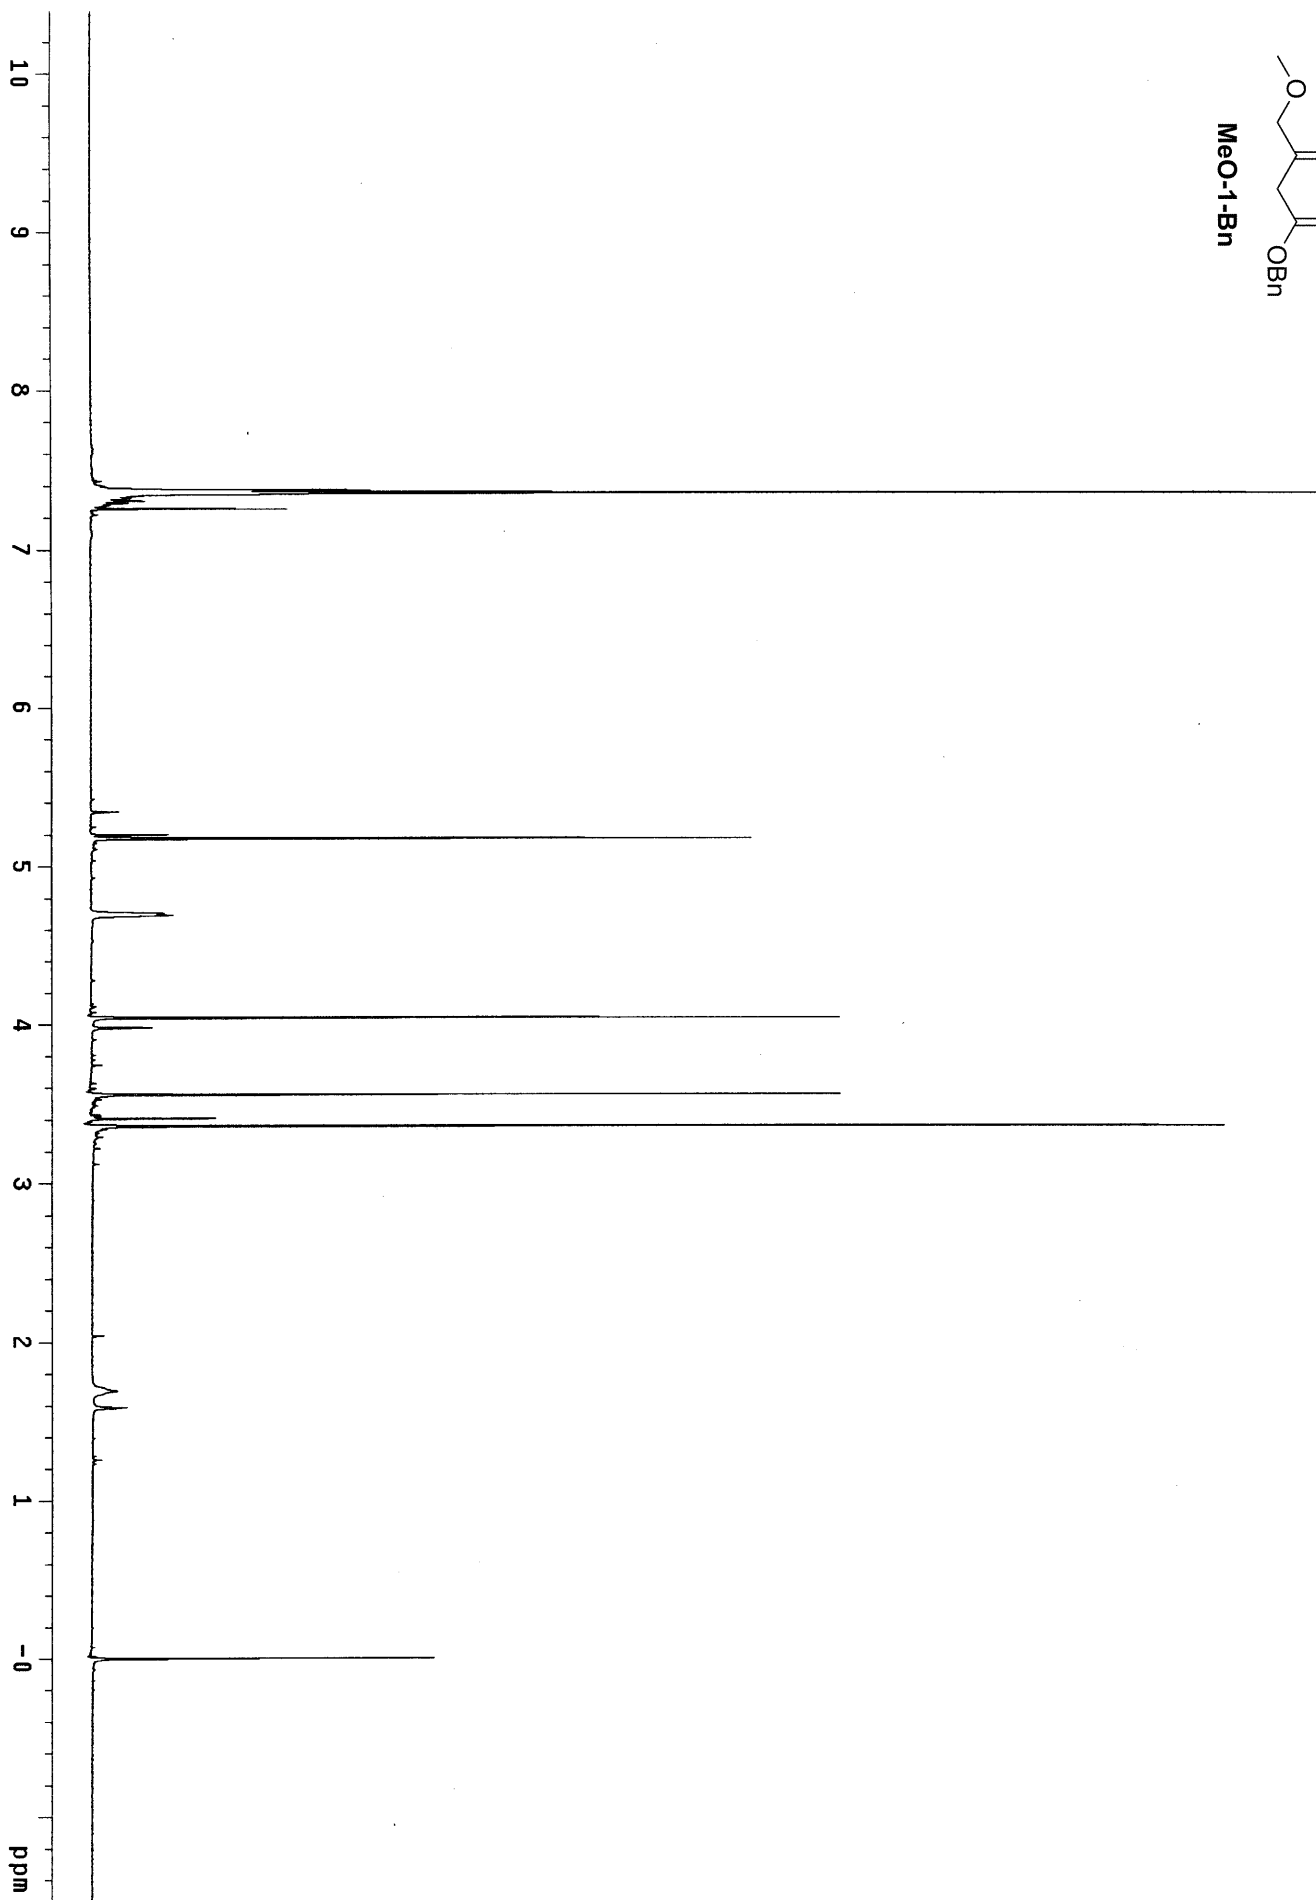

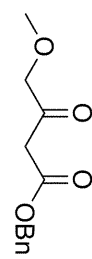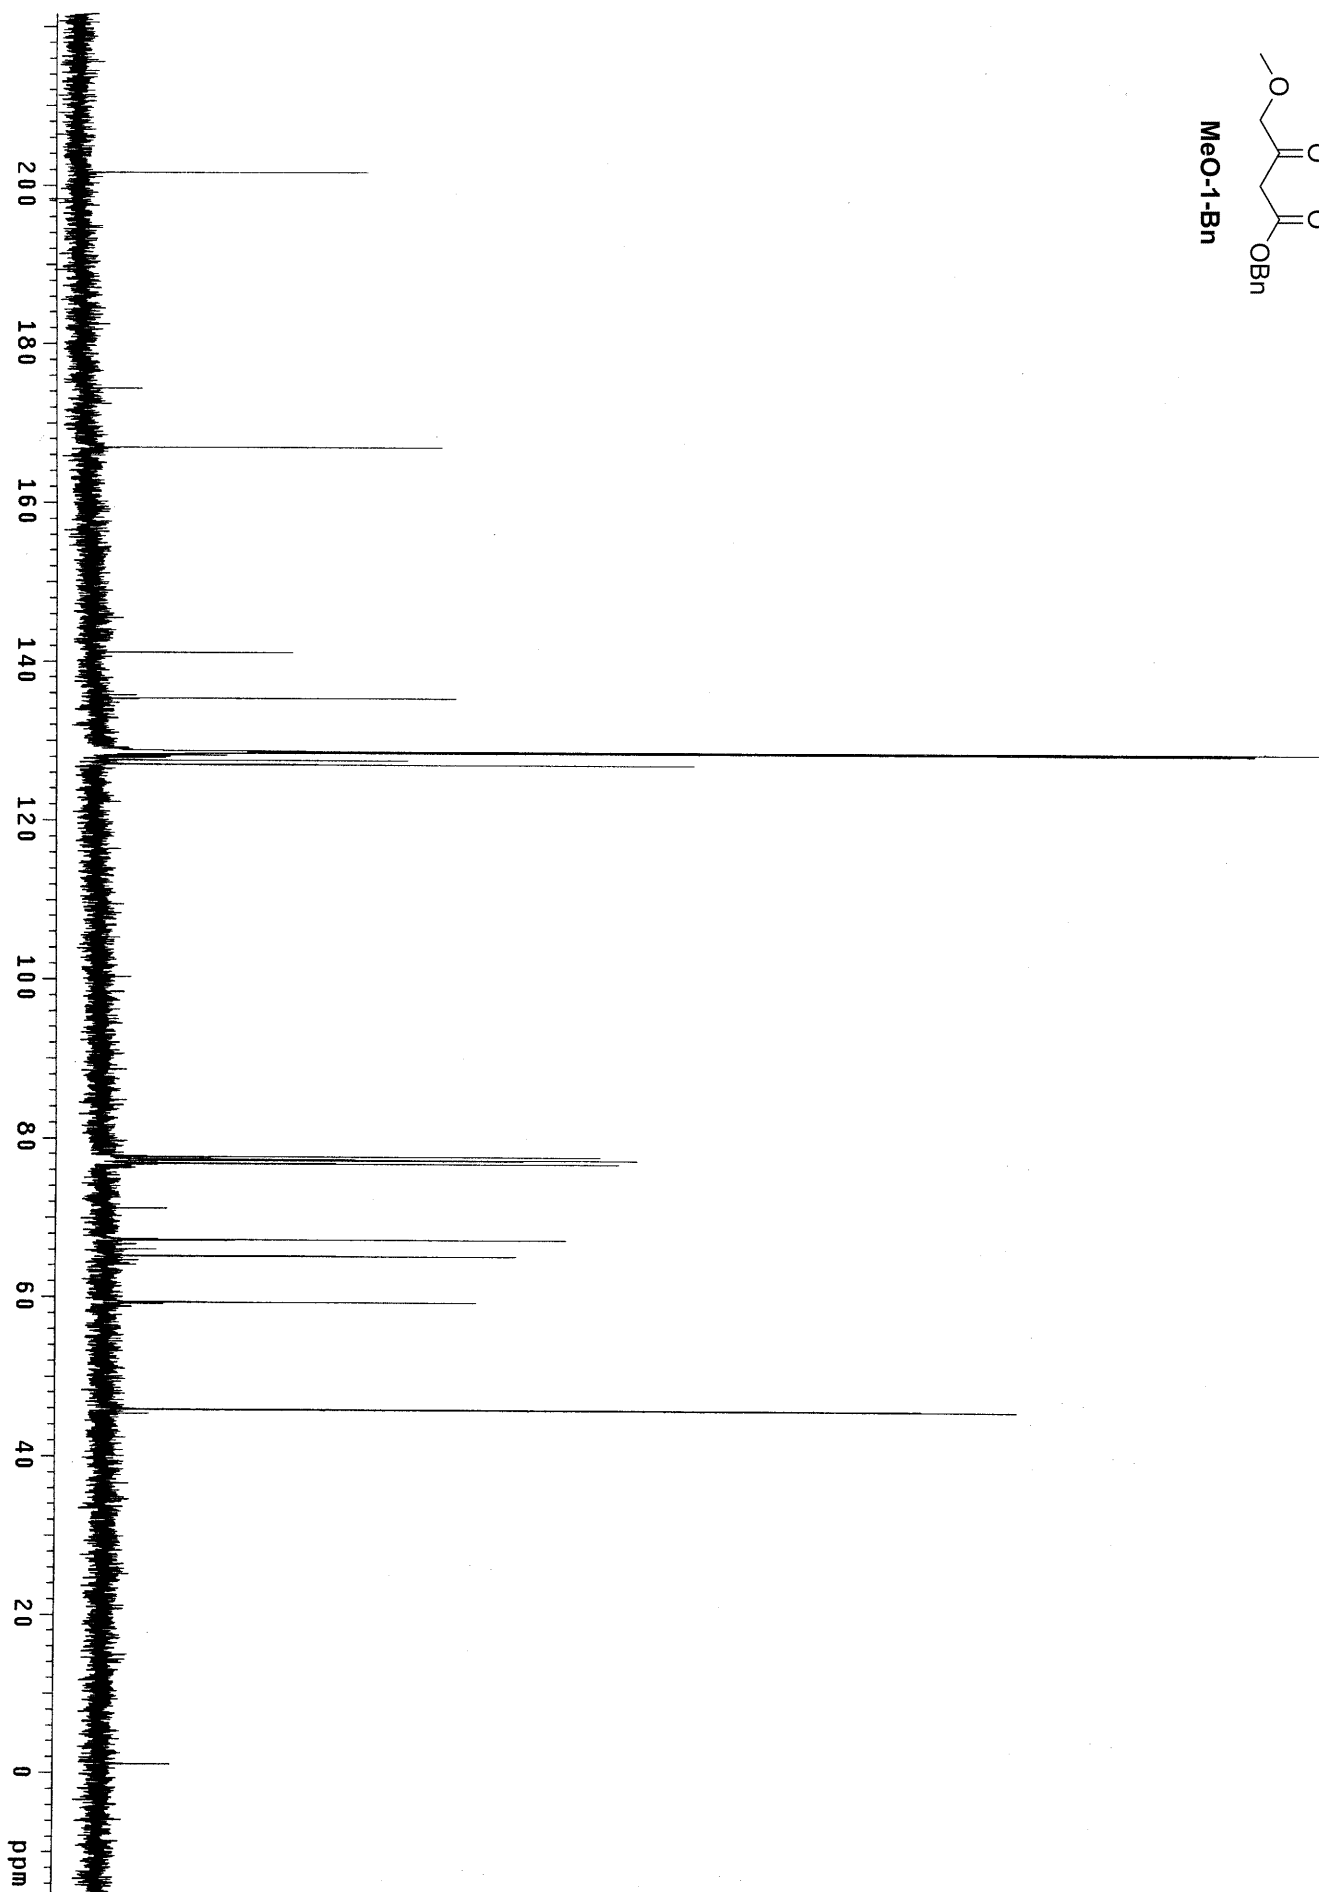

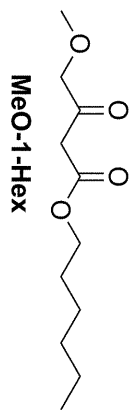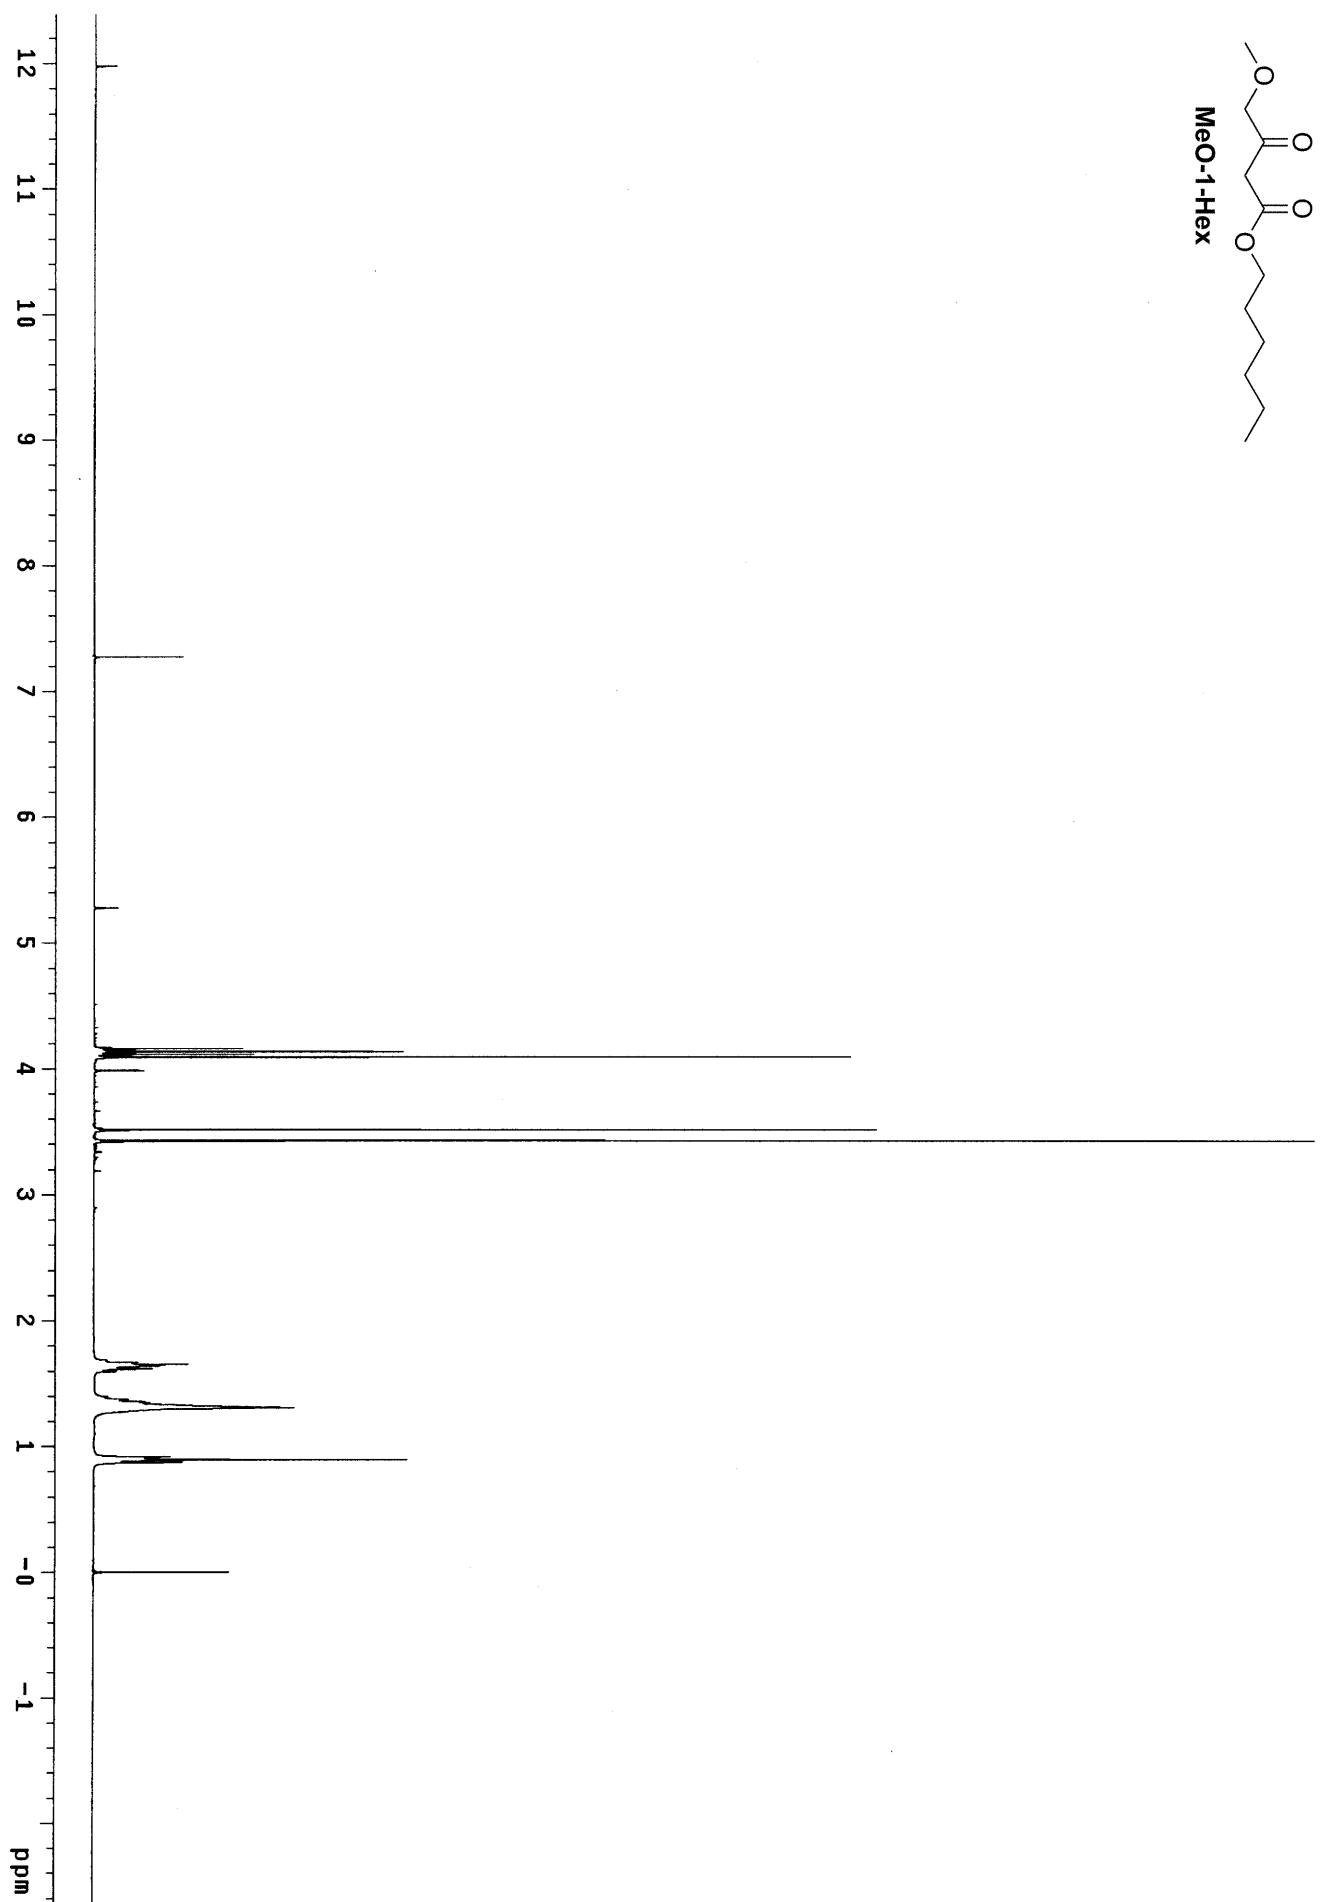

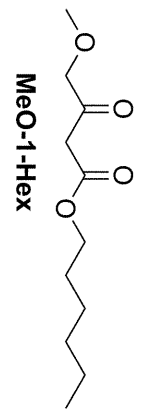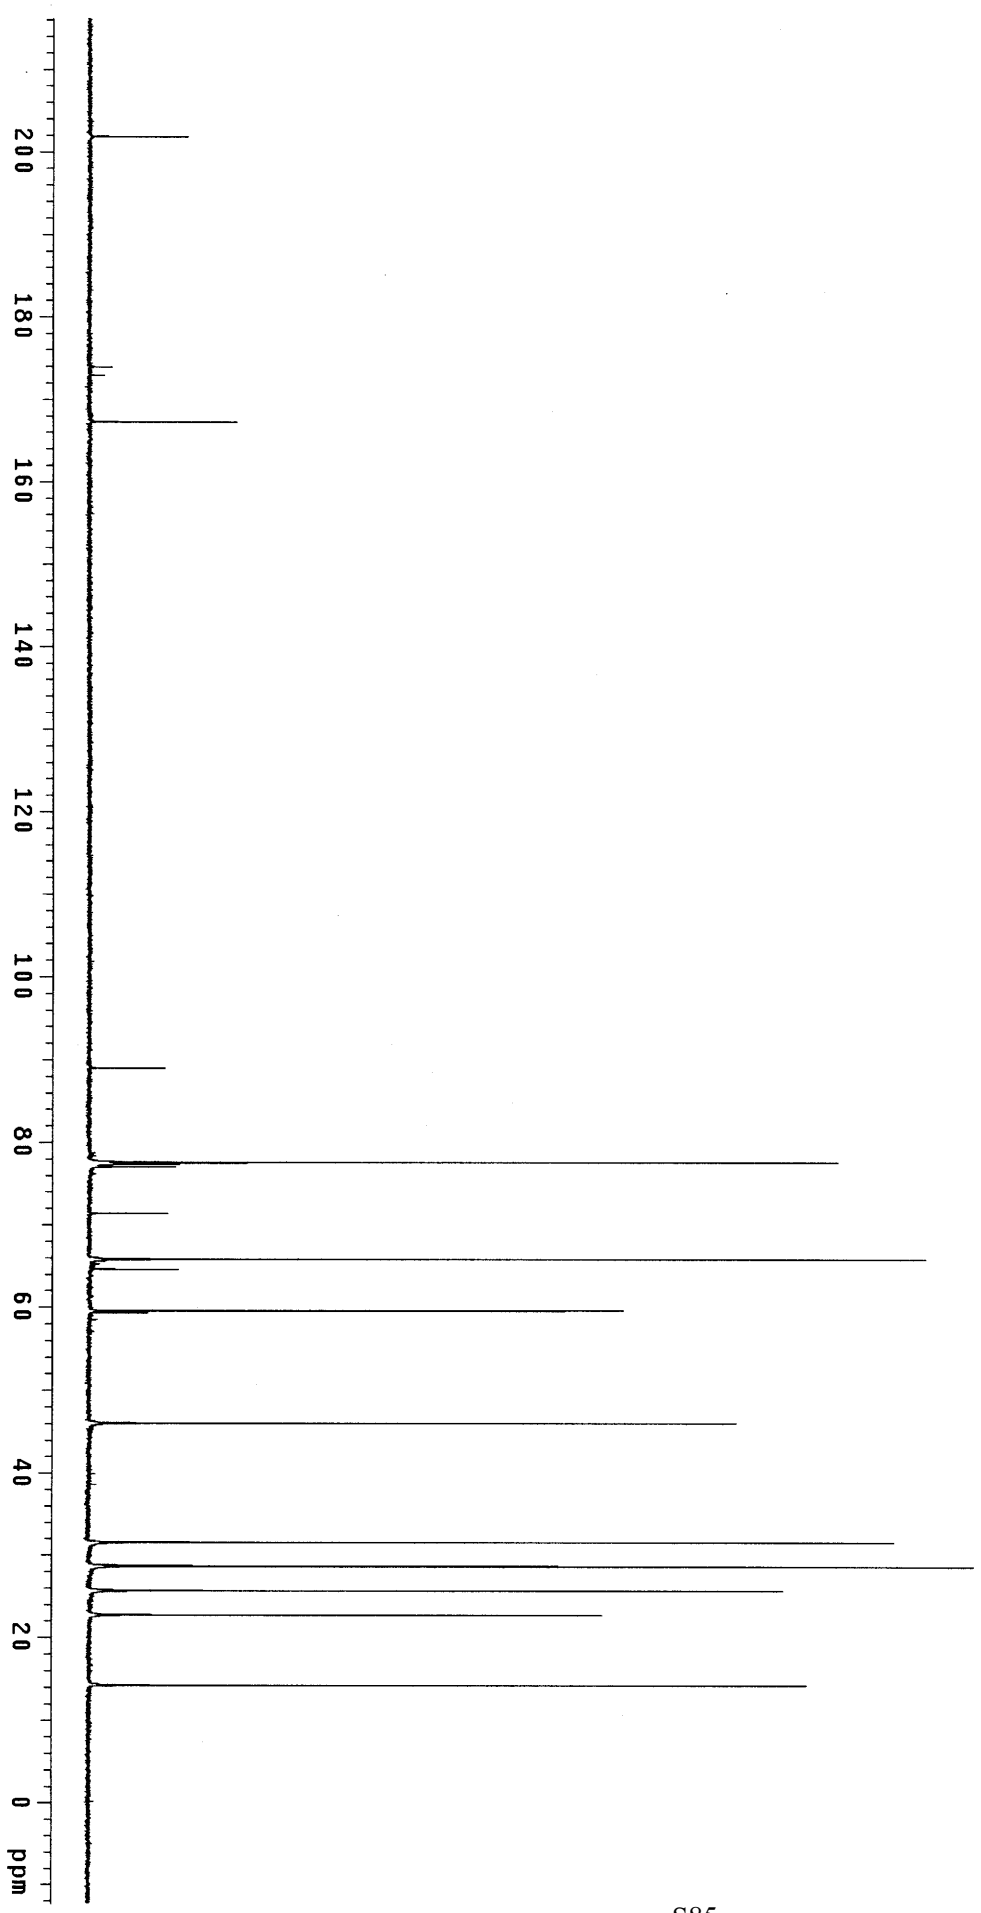

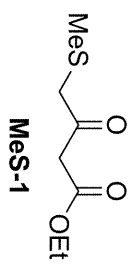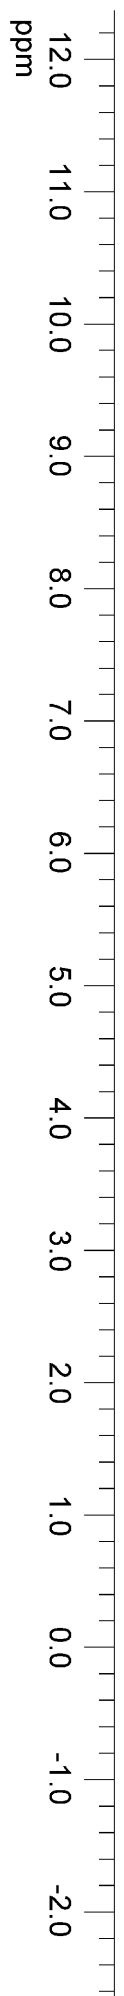

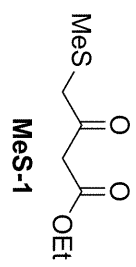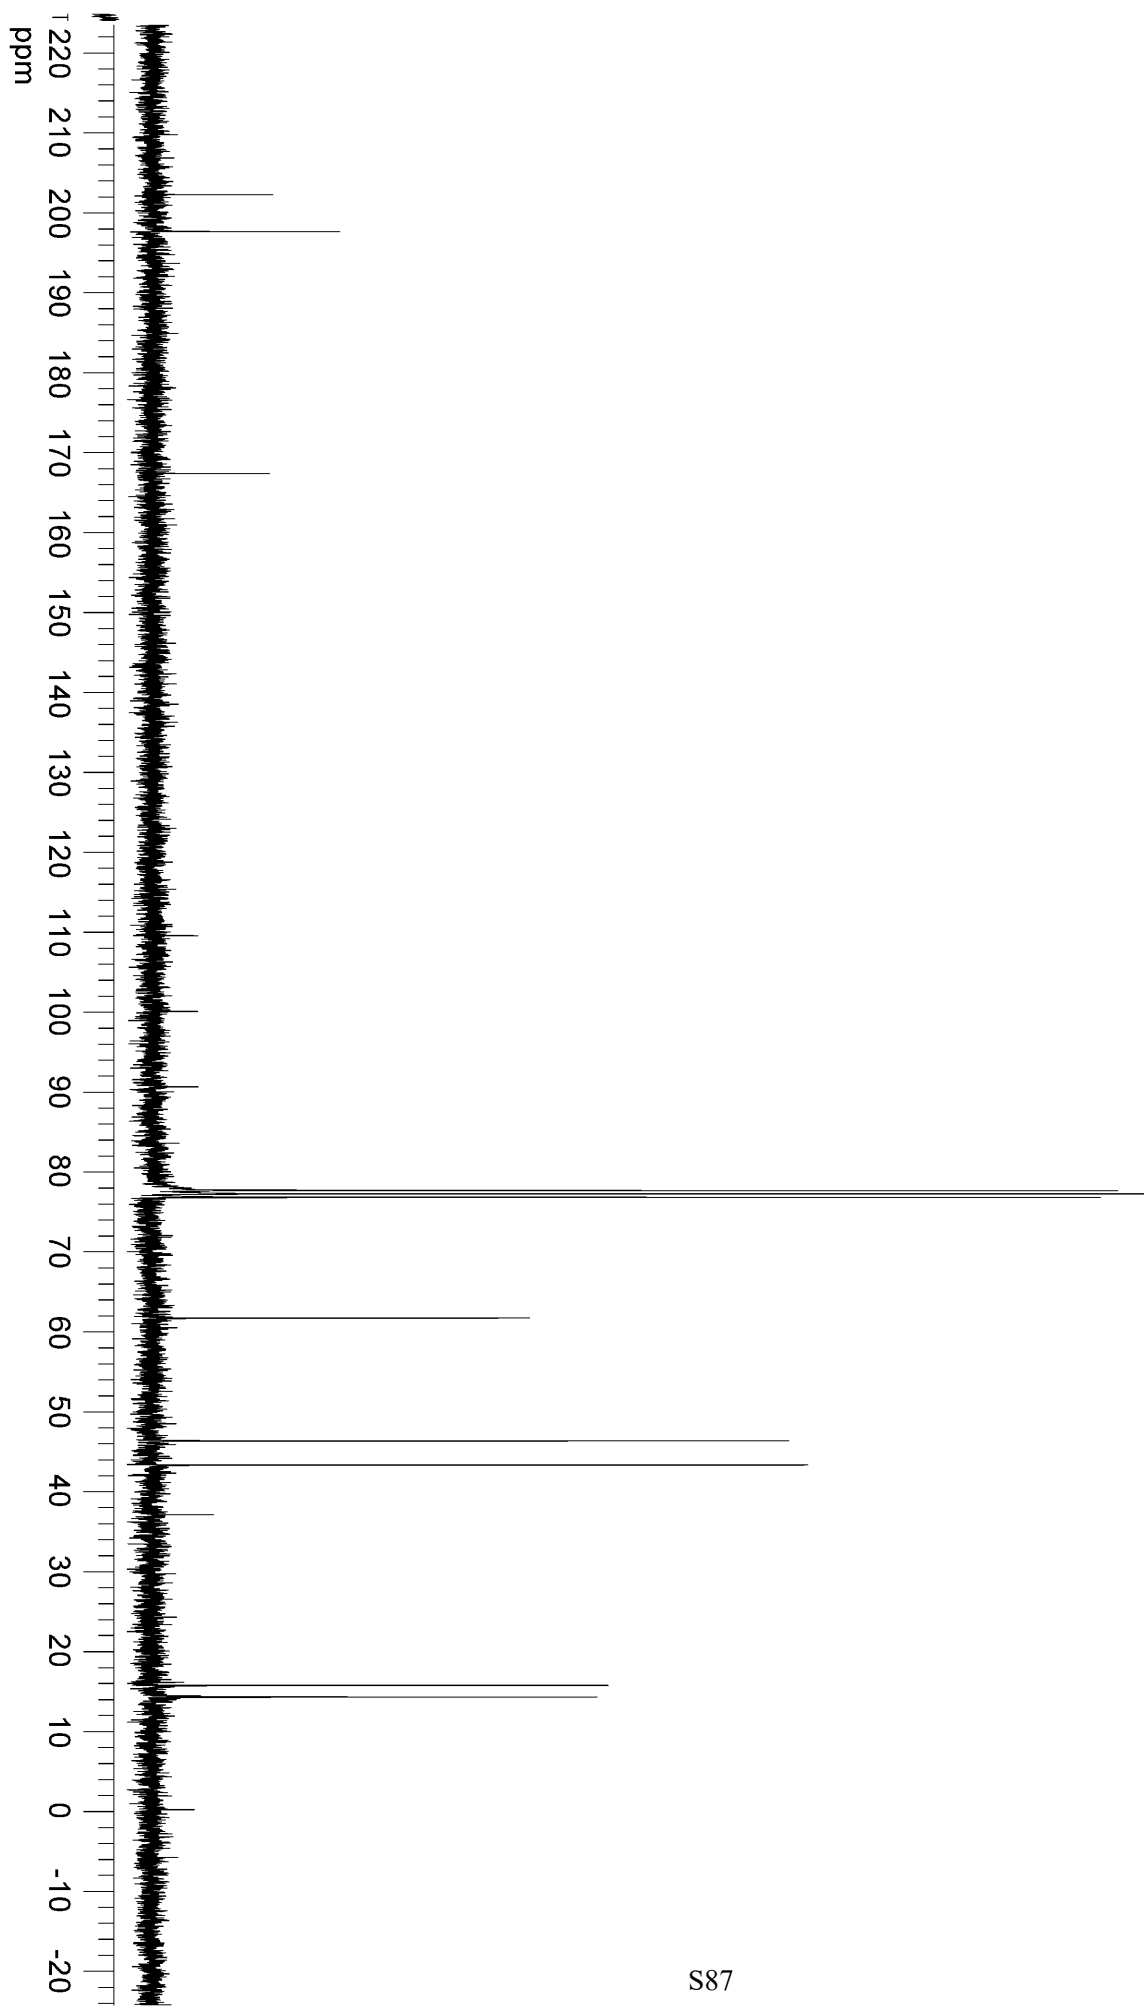

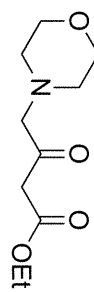

Mof-1

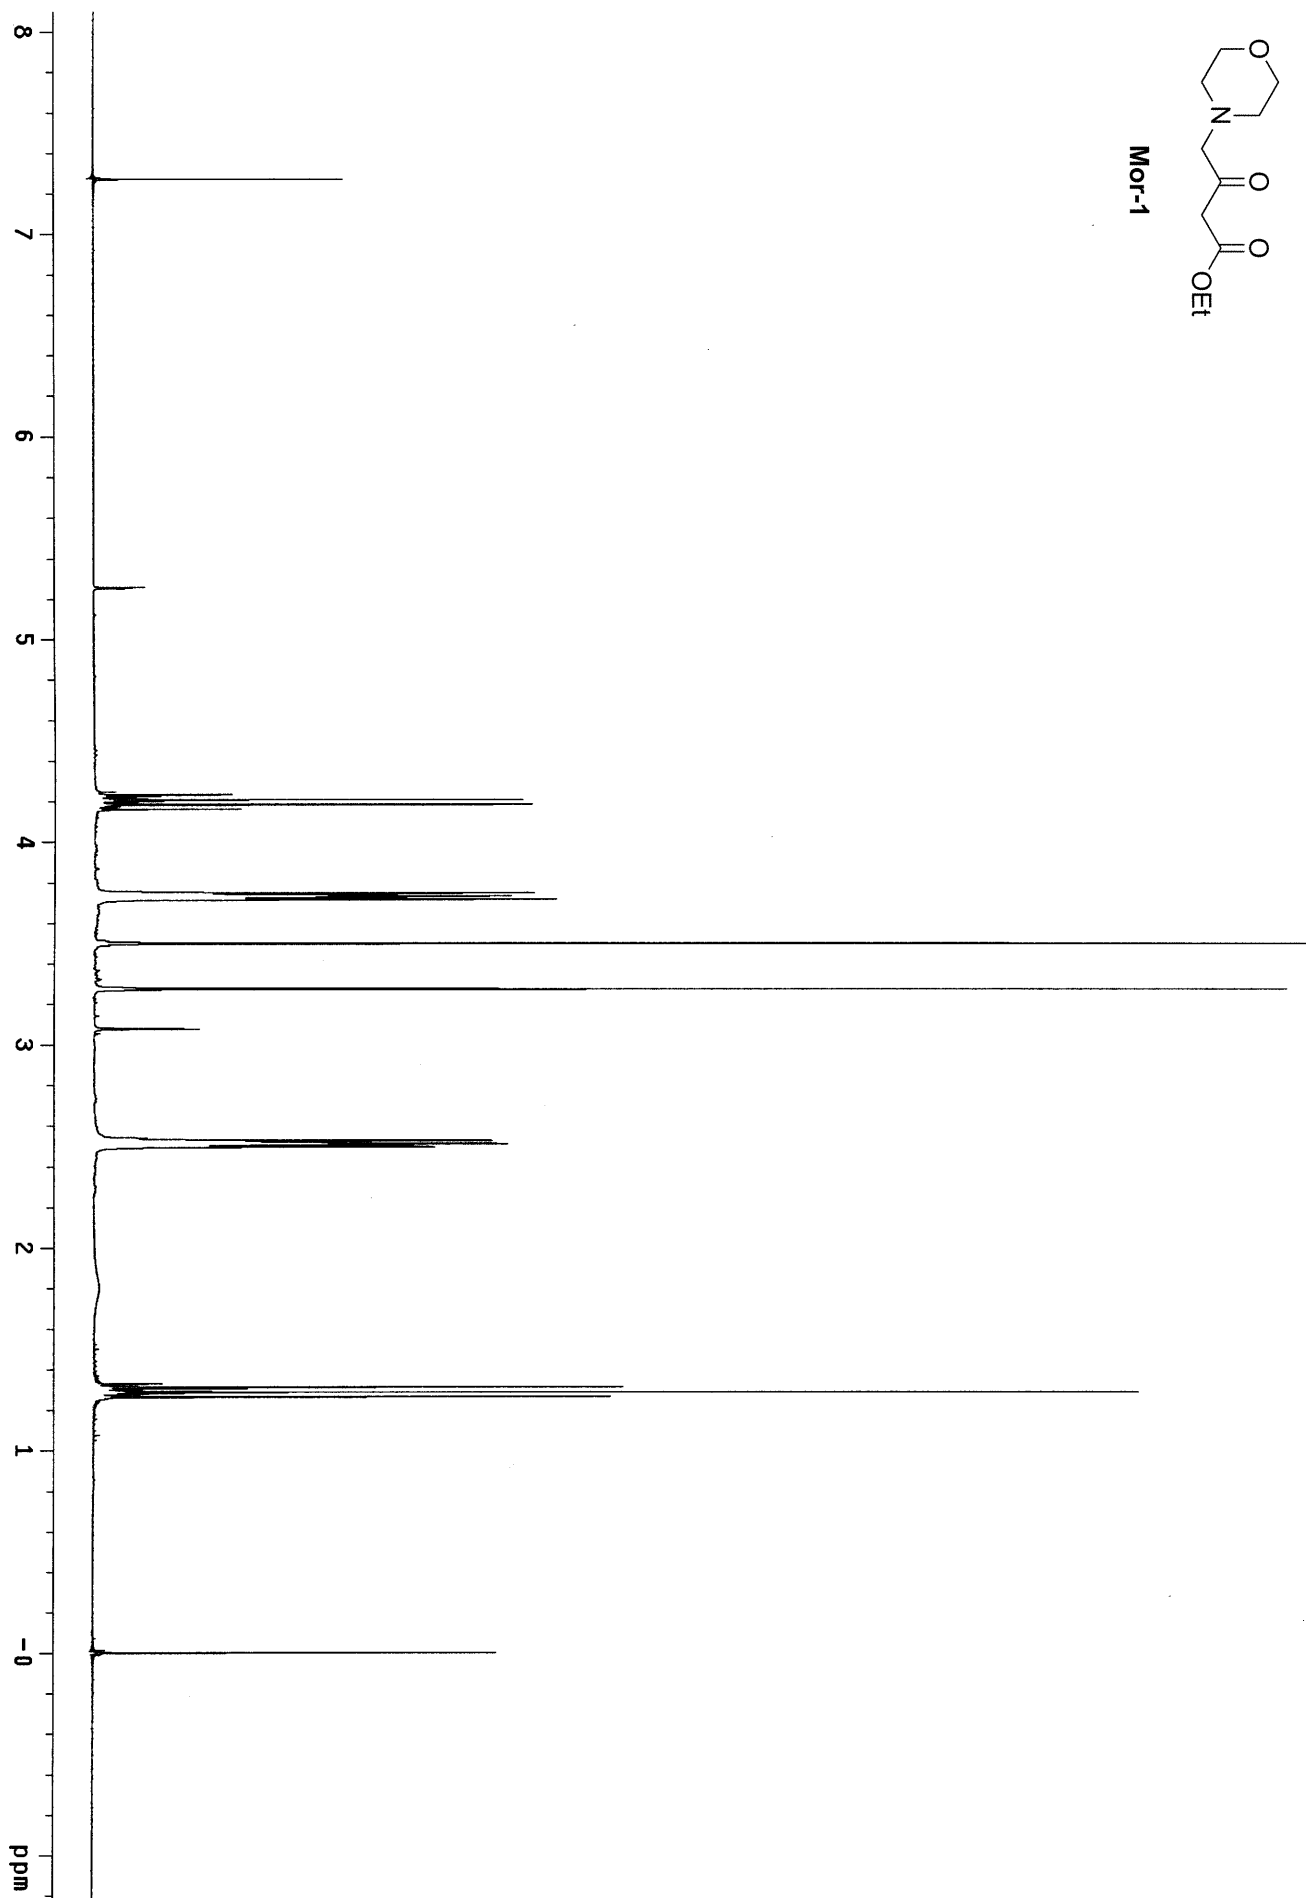



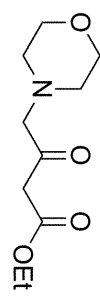

Mor-1

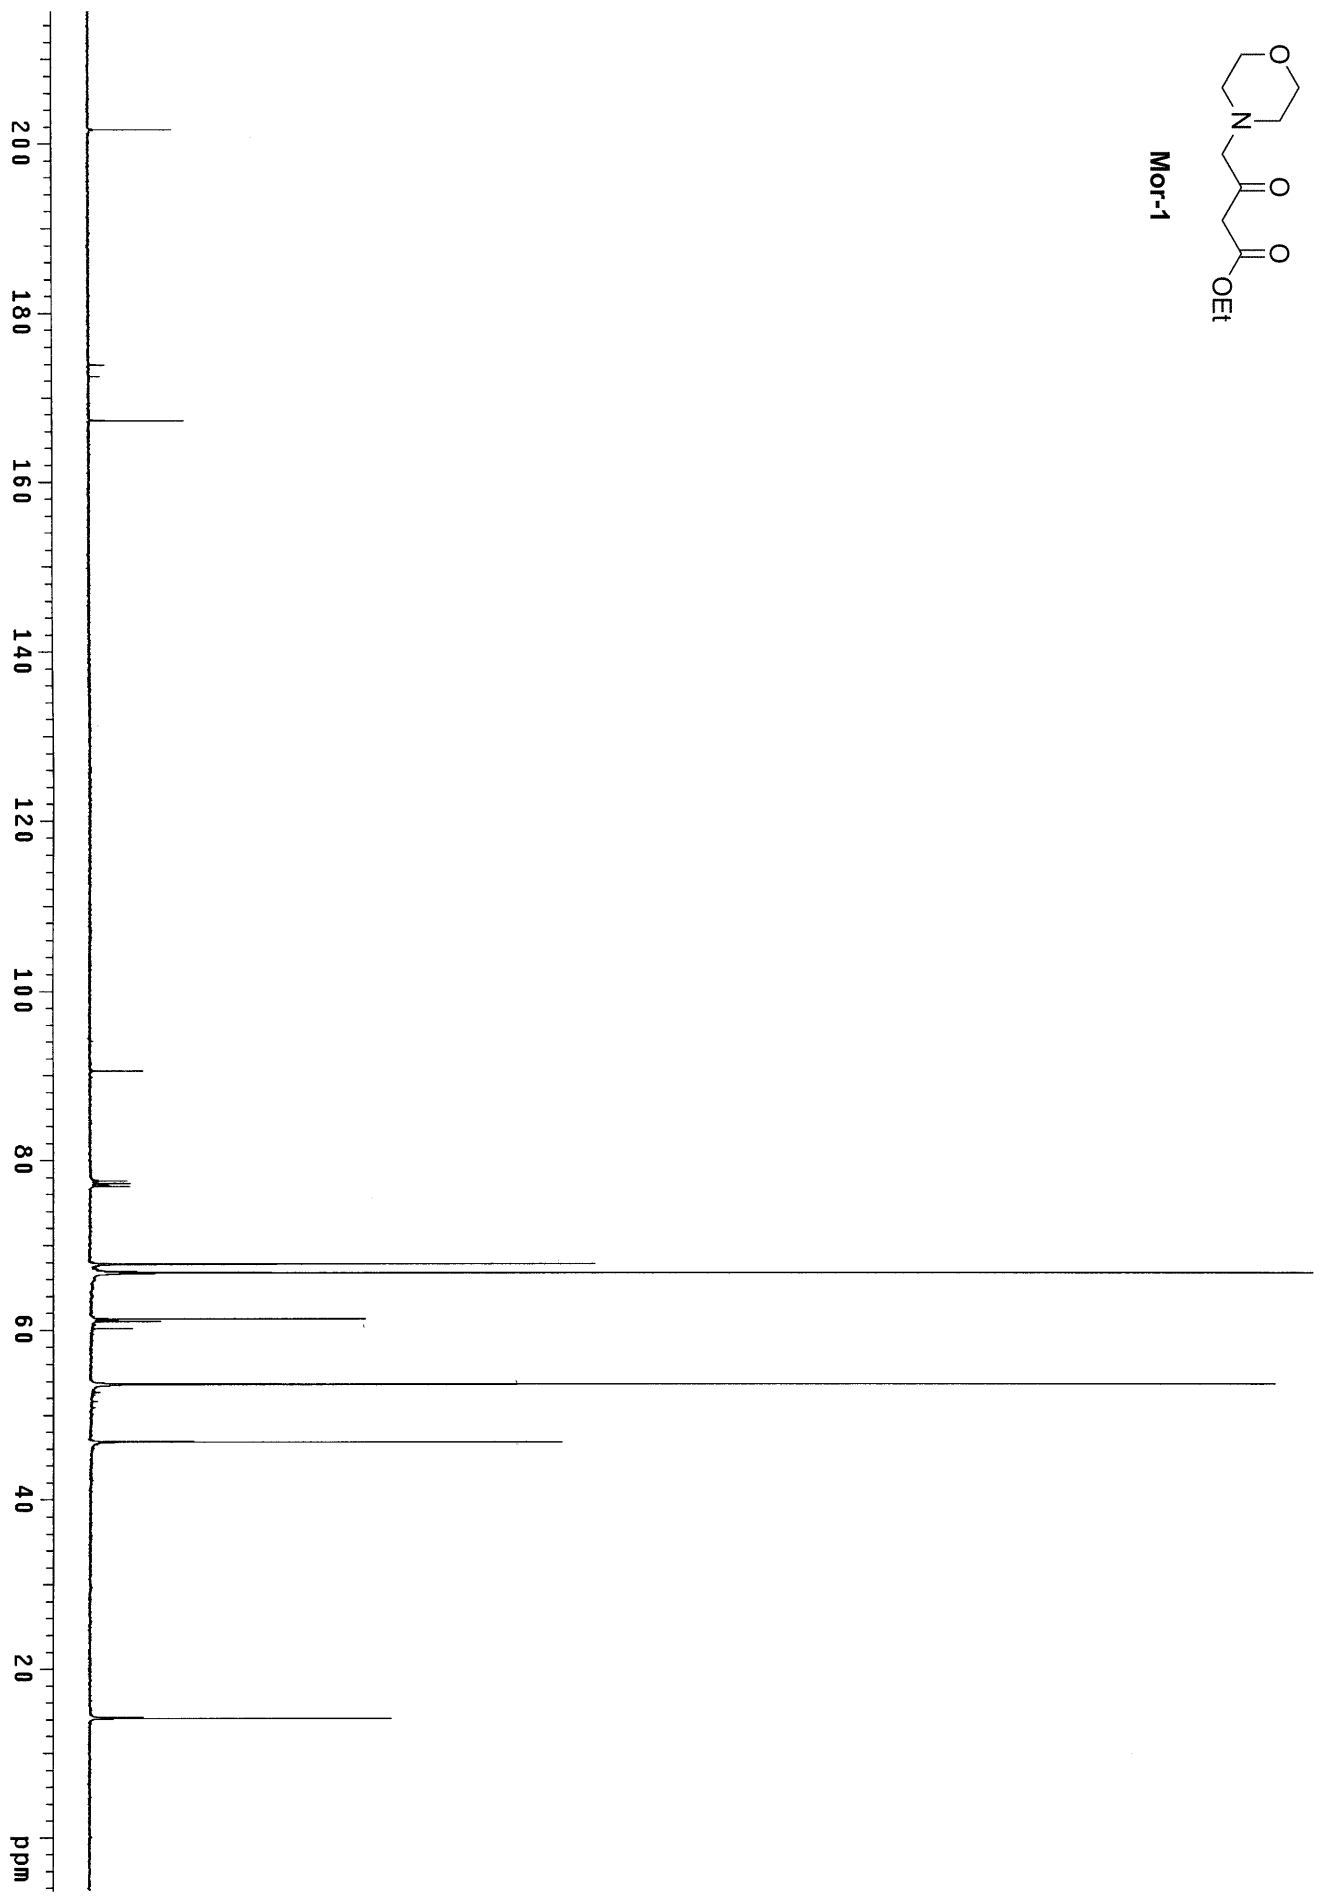

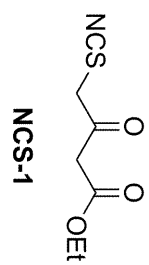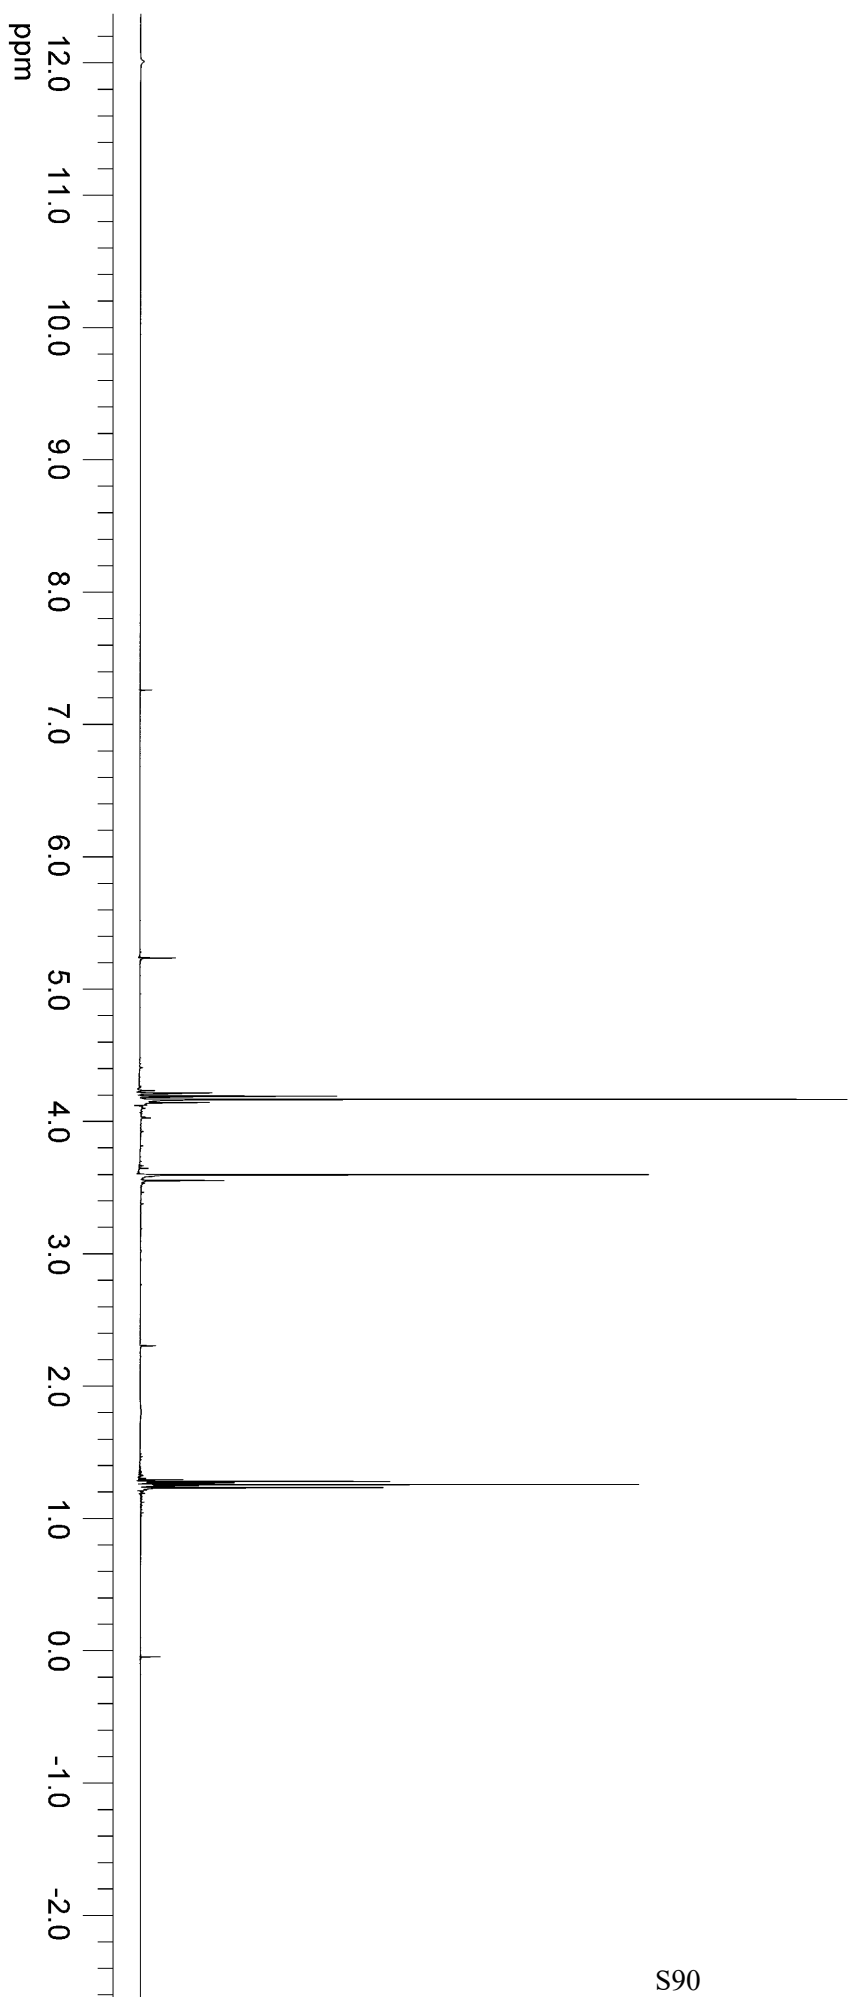

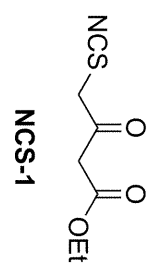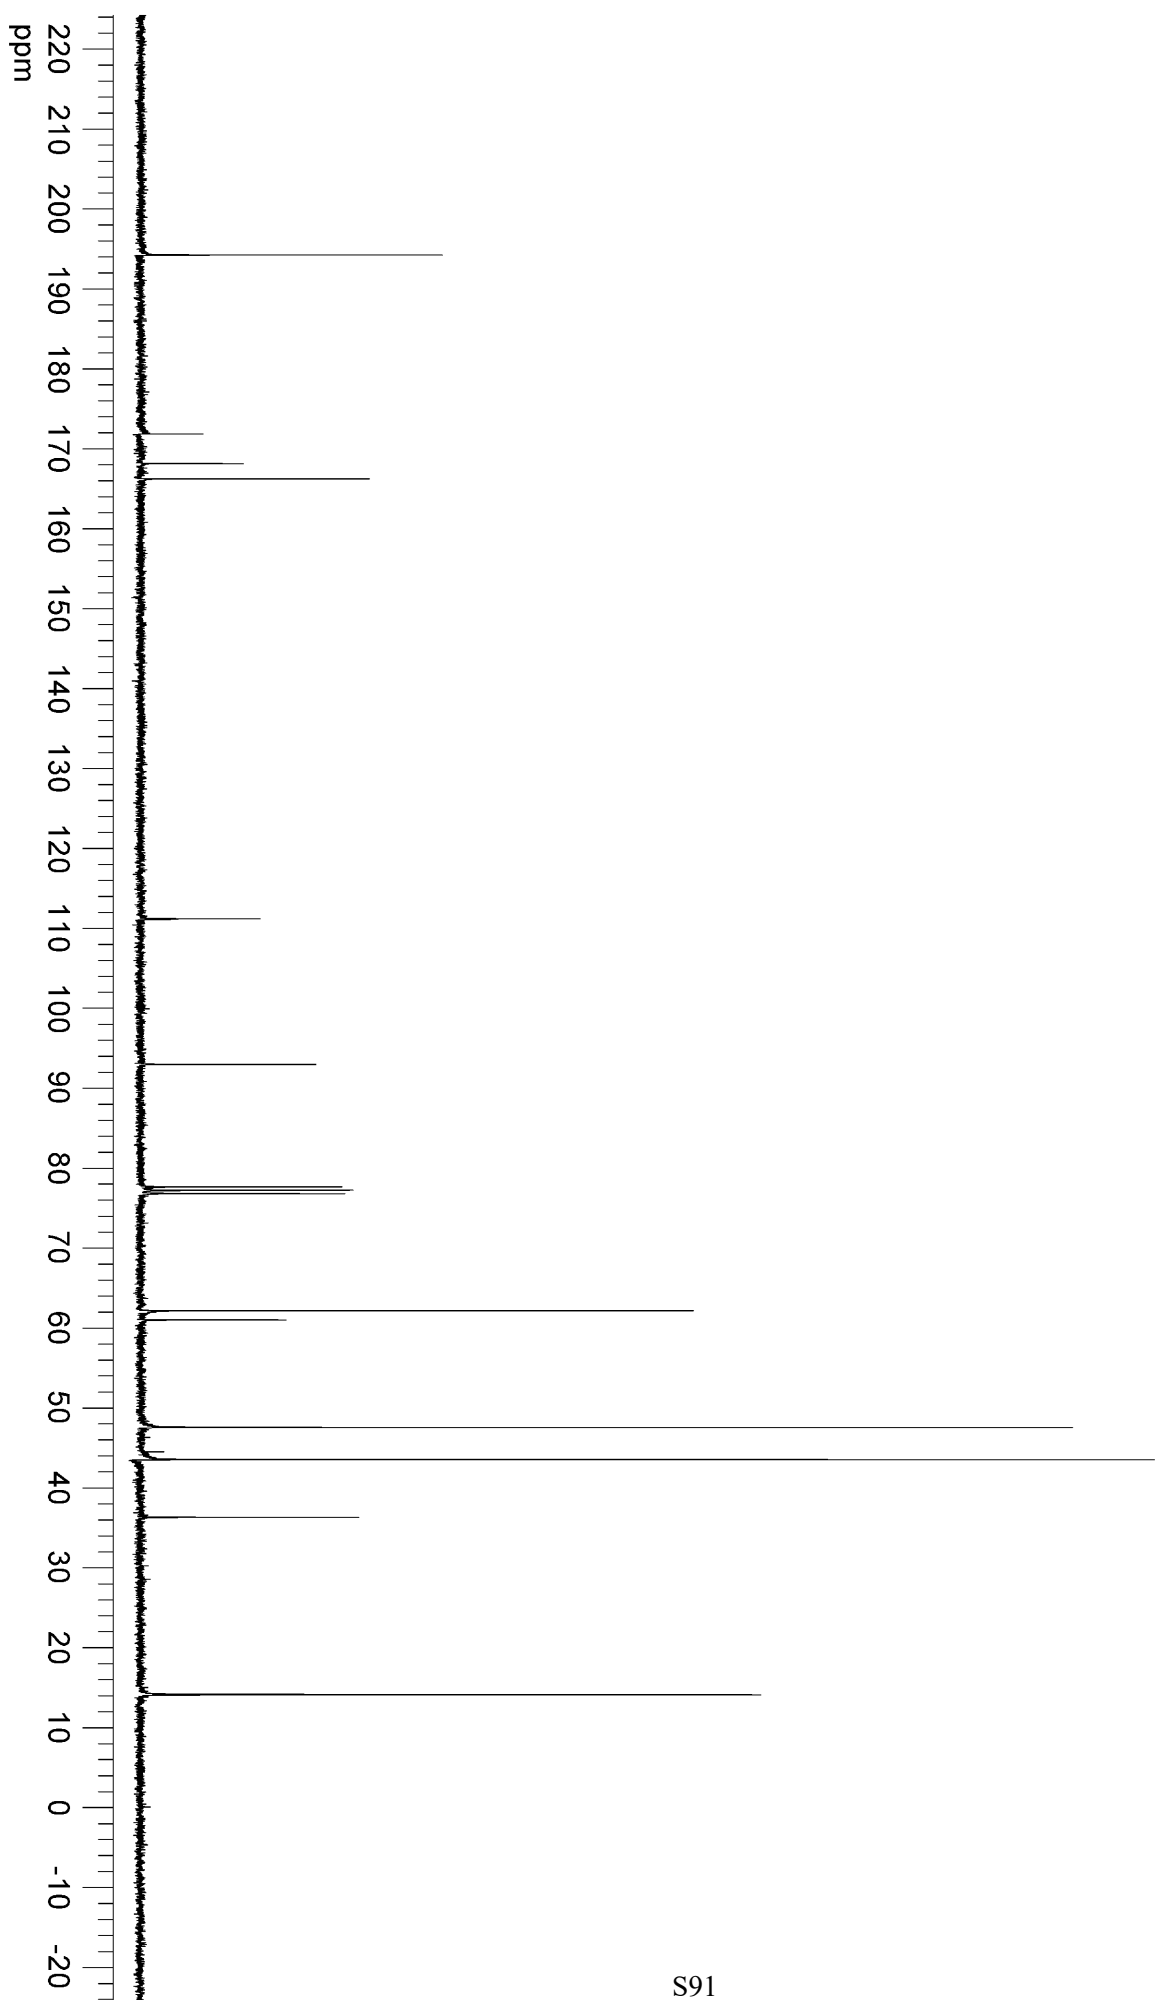

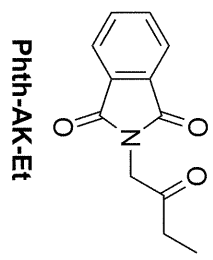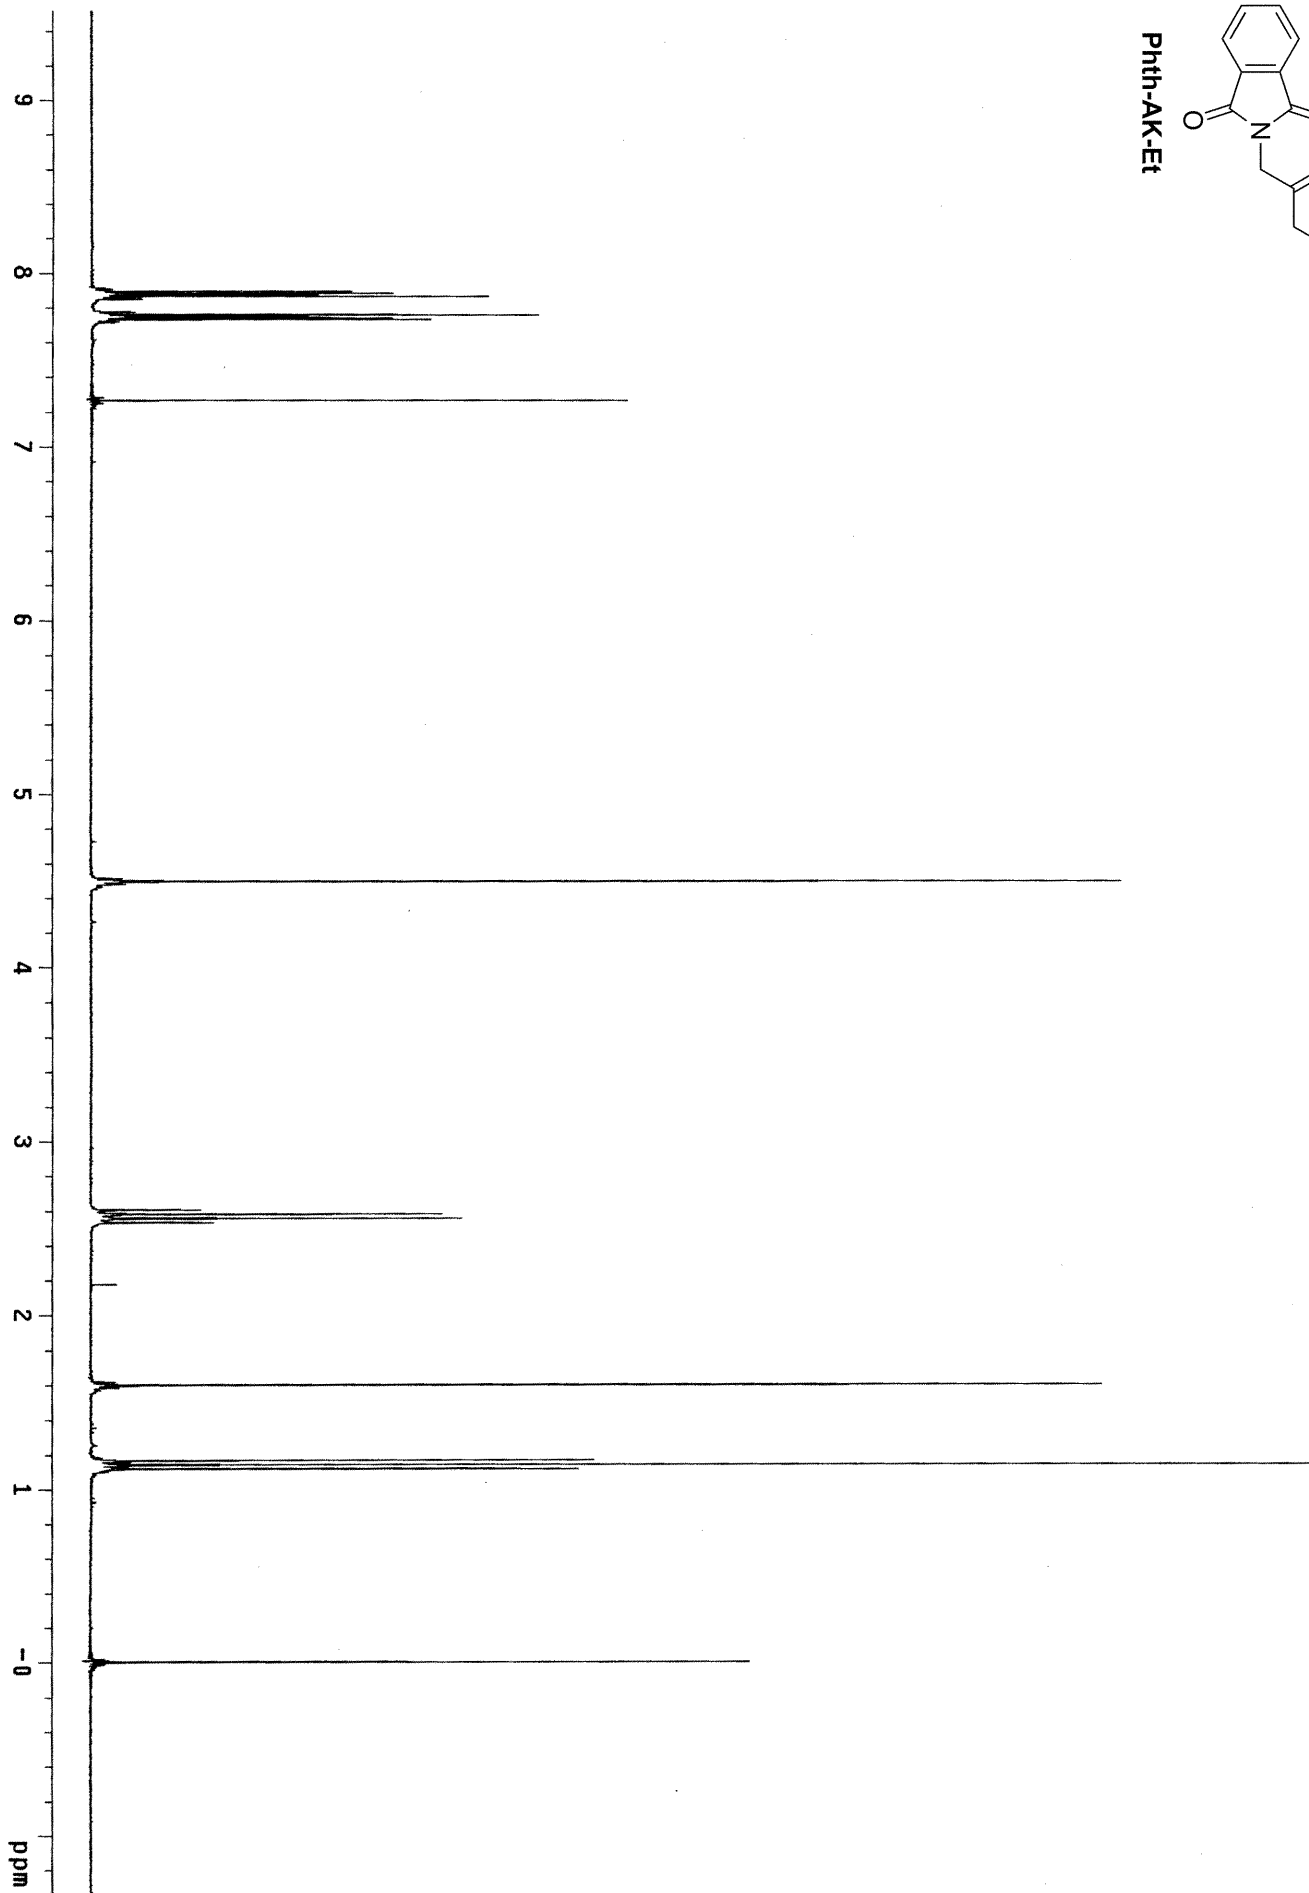

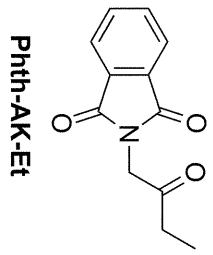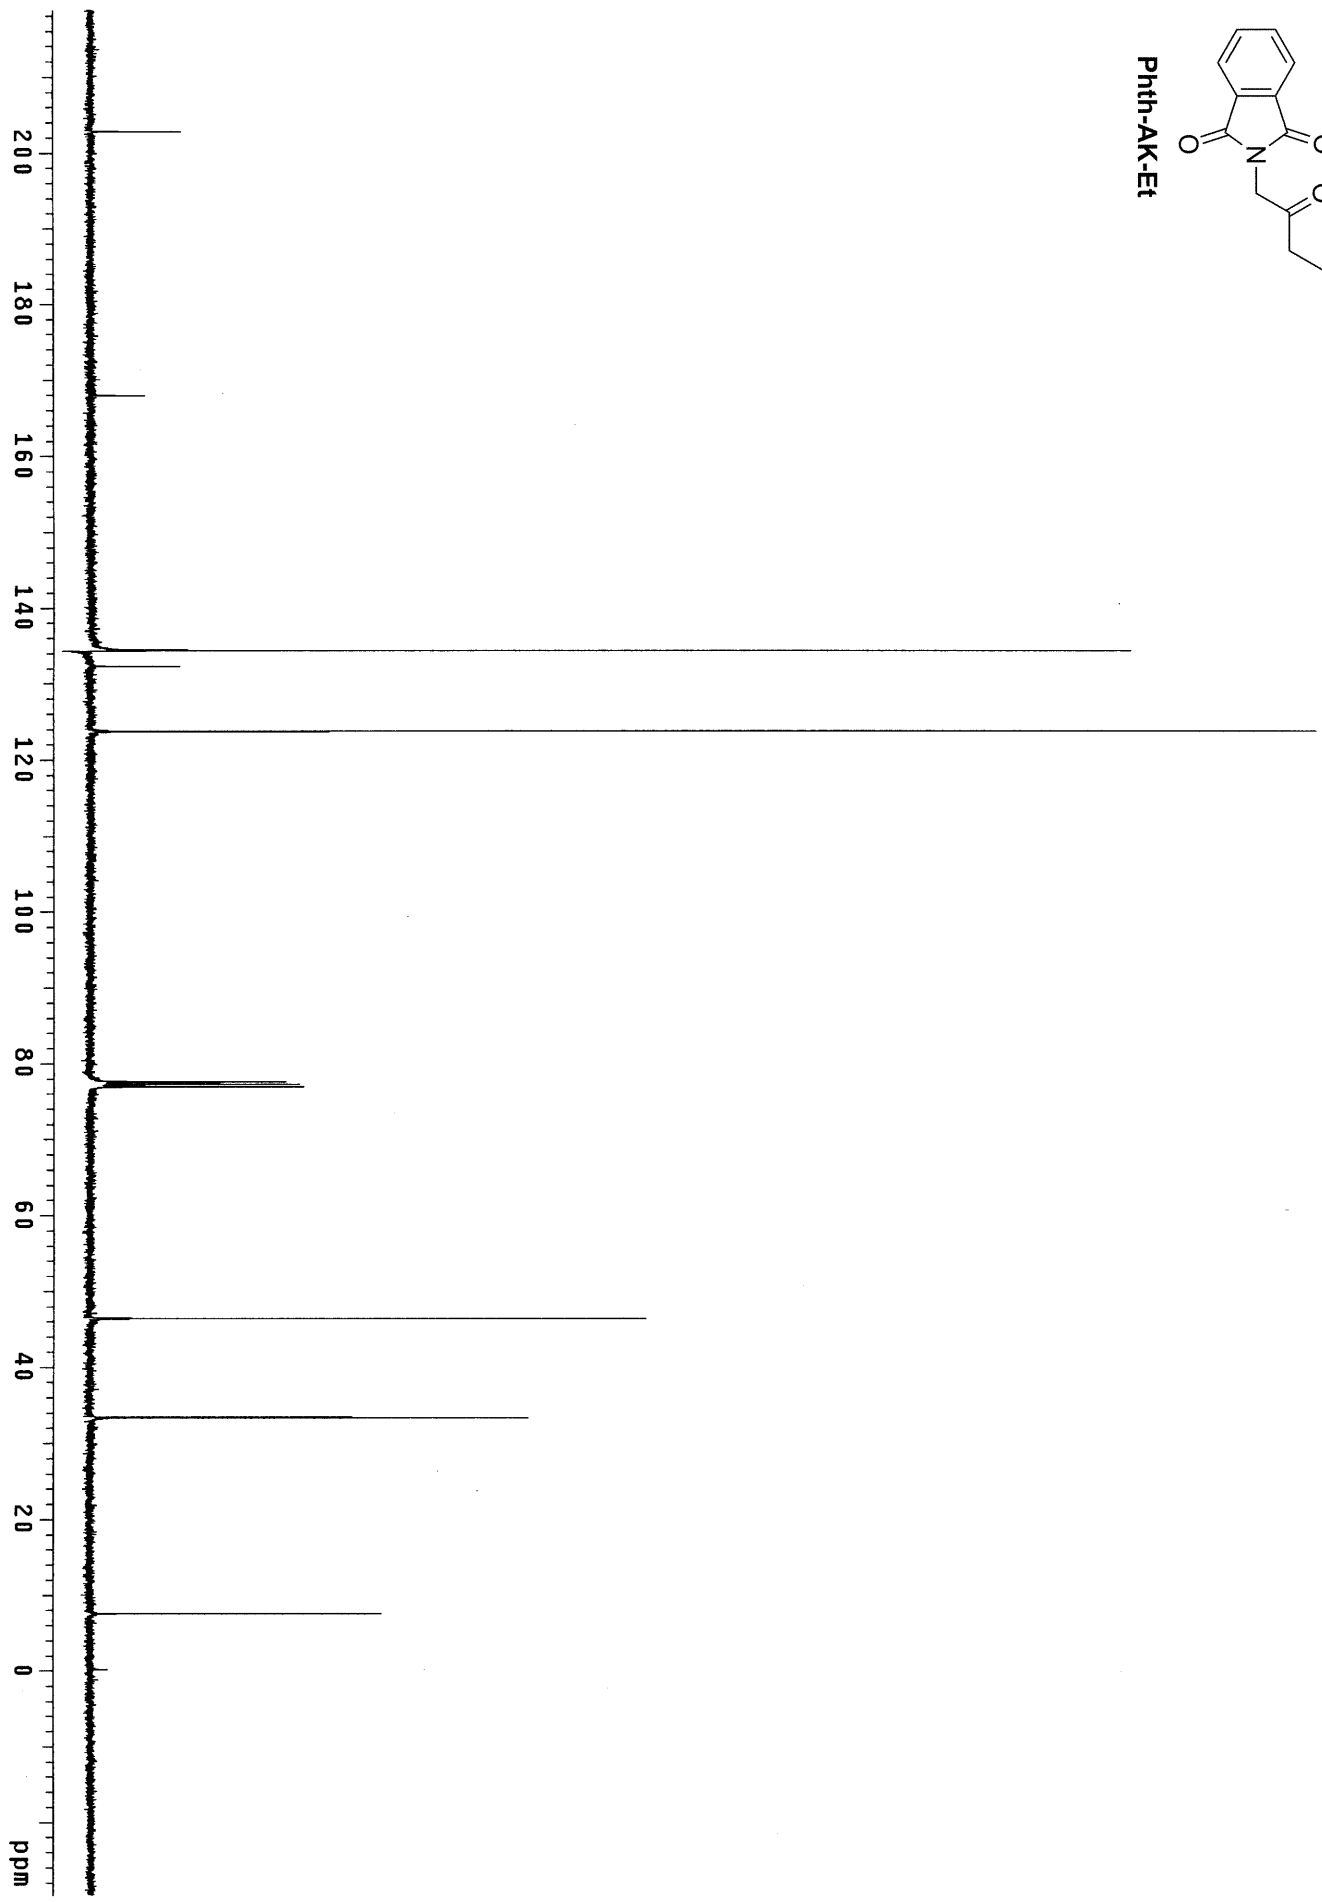

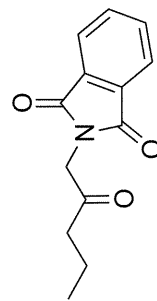

Phth-AK-Pr

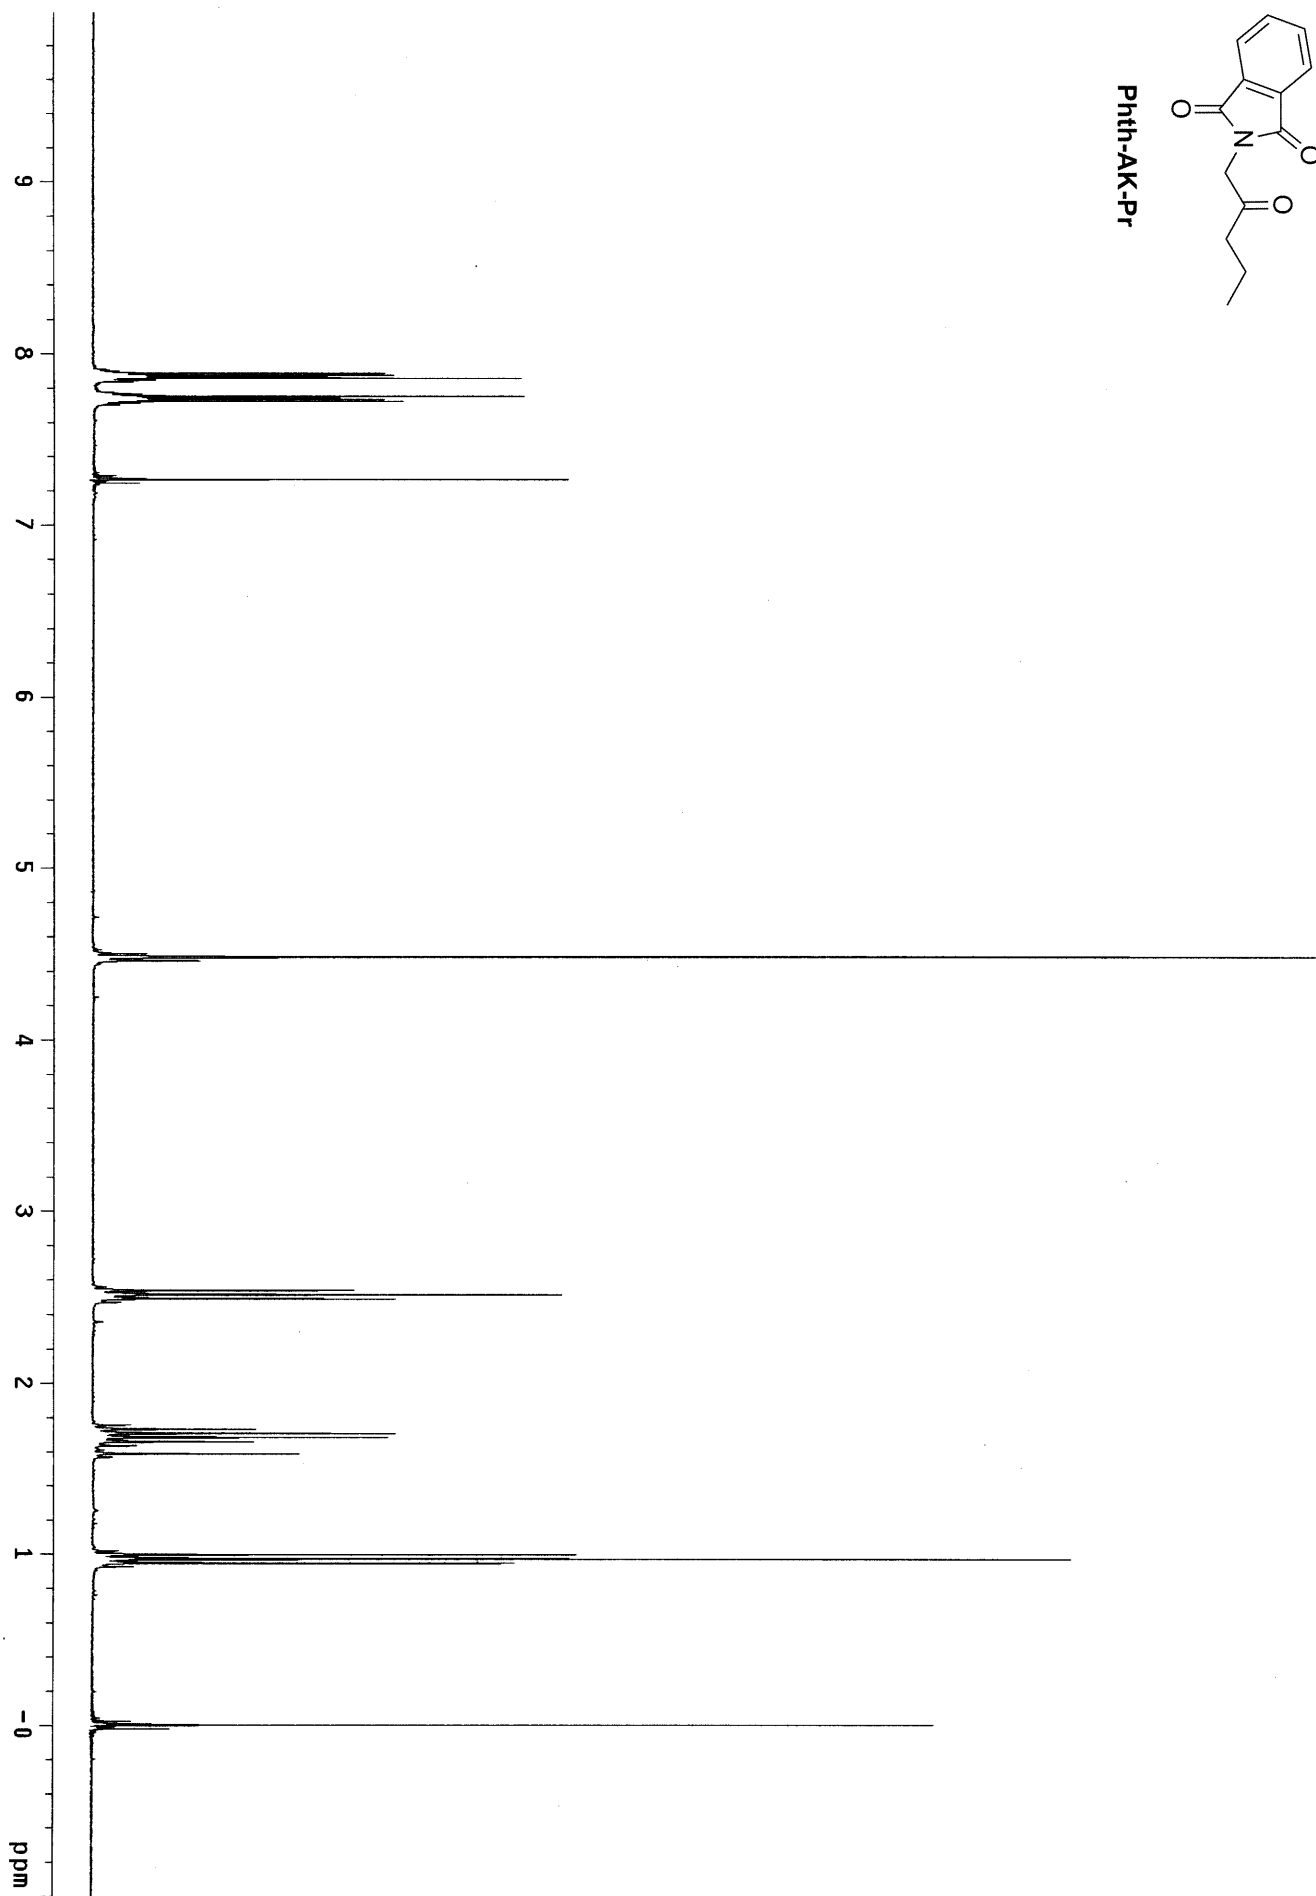

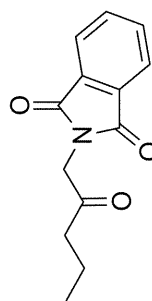

Phth-AK-Pr

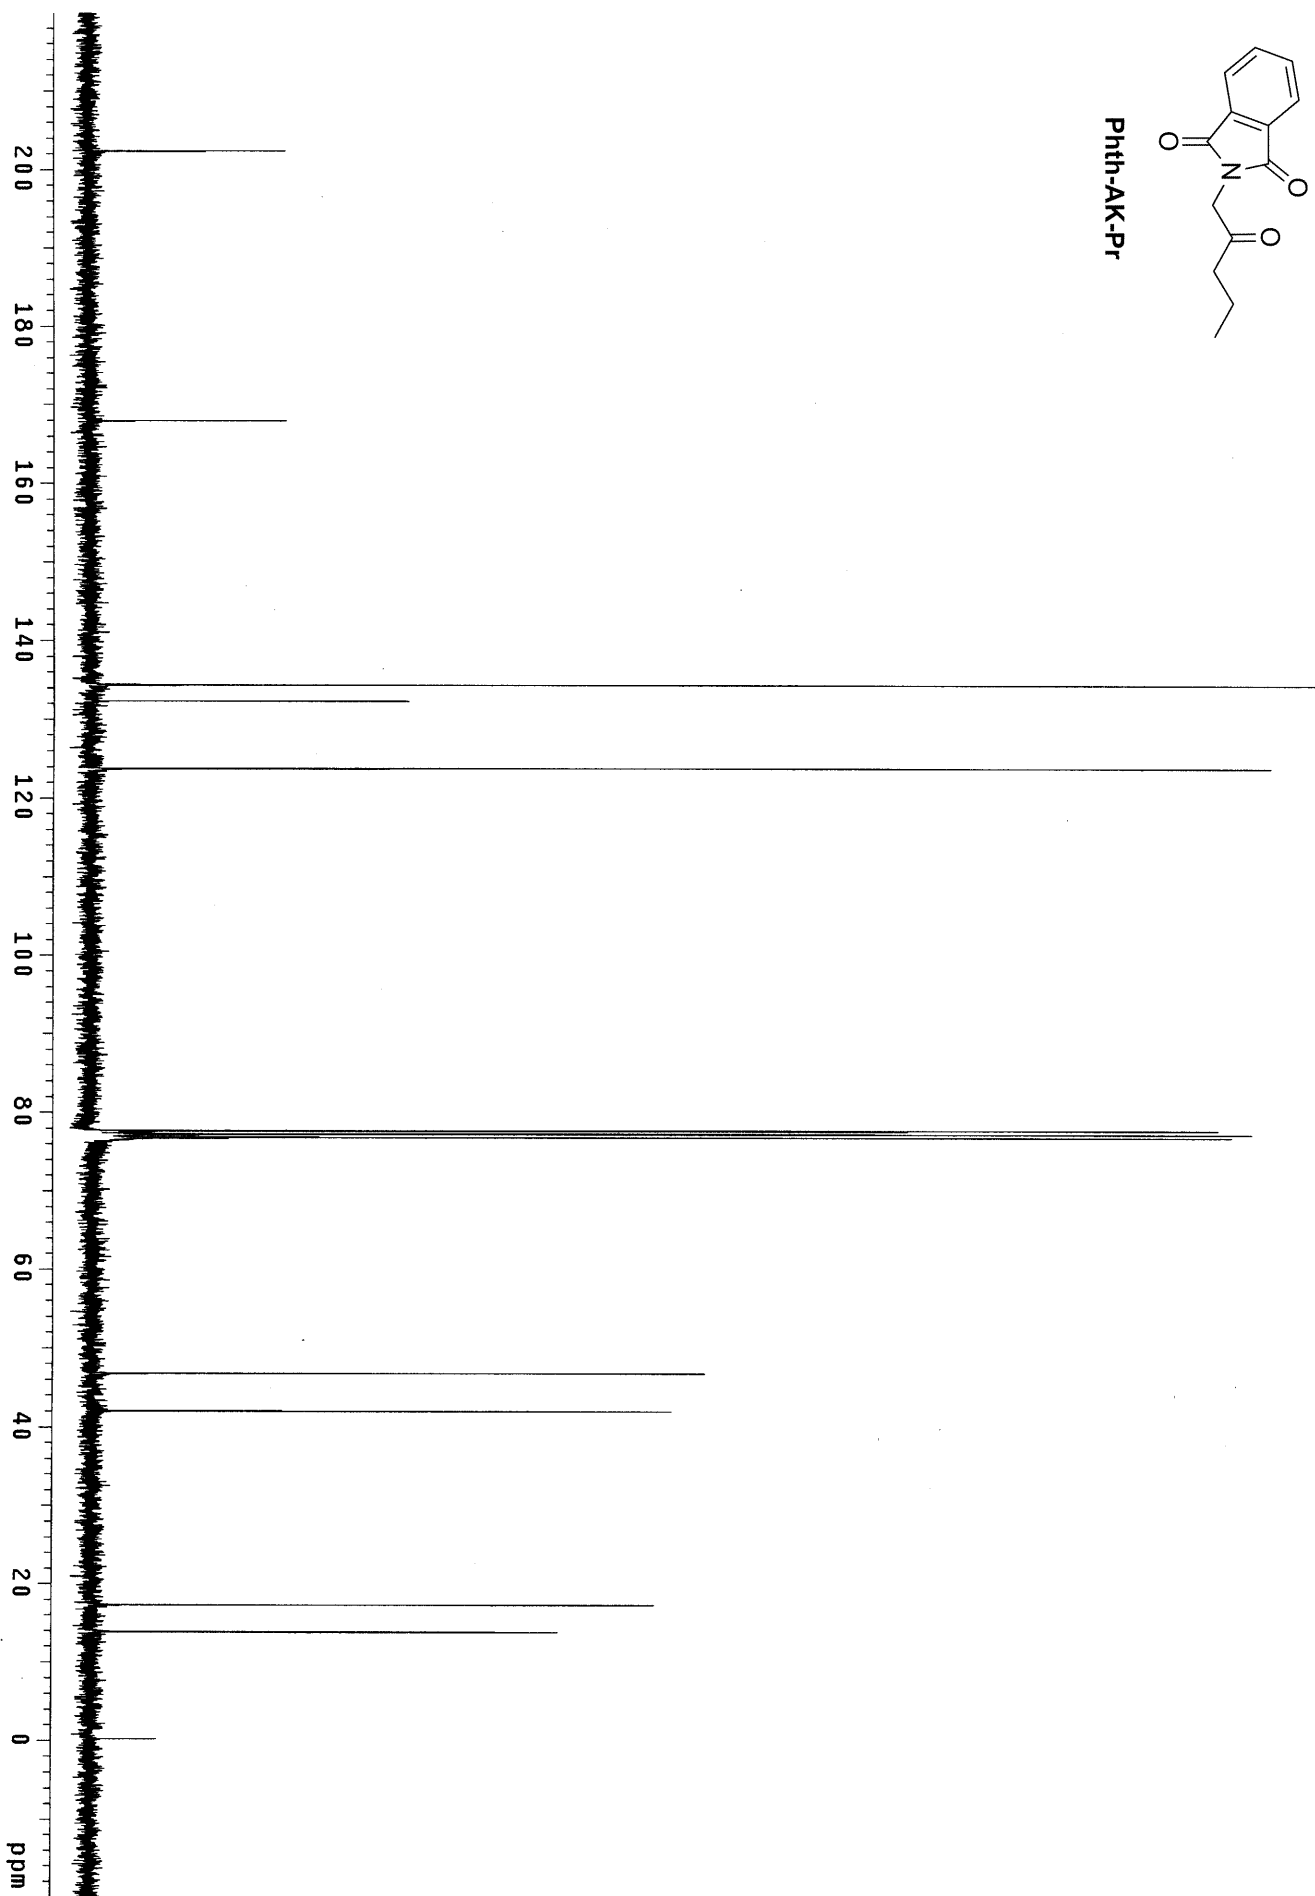

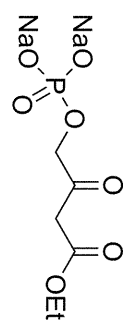

PIO-1

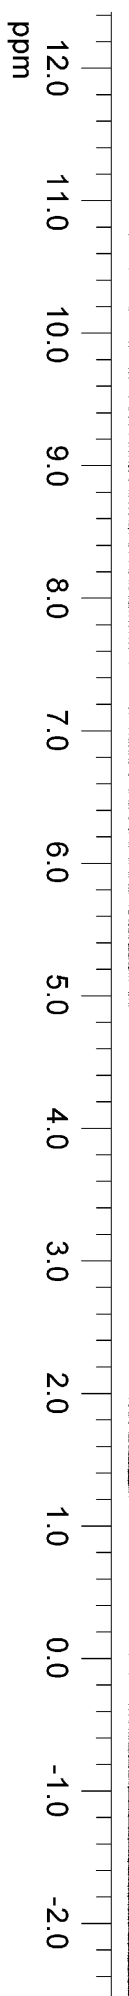



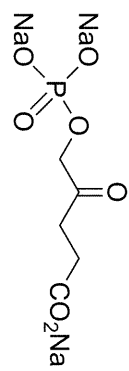

P10-3

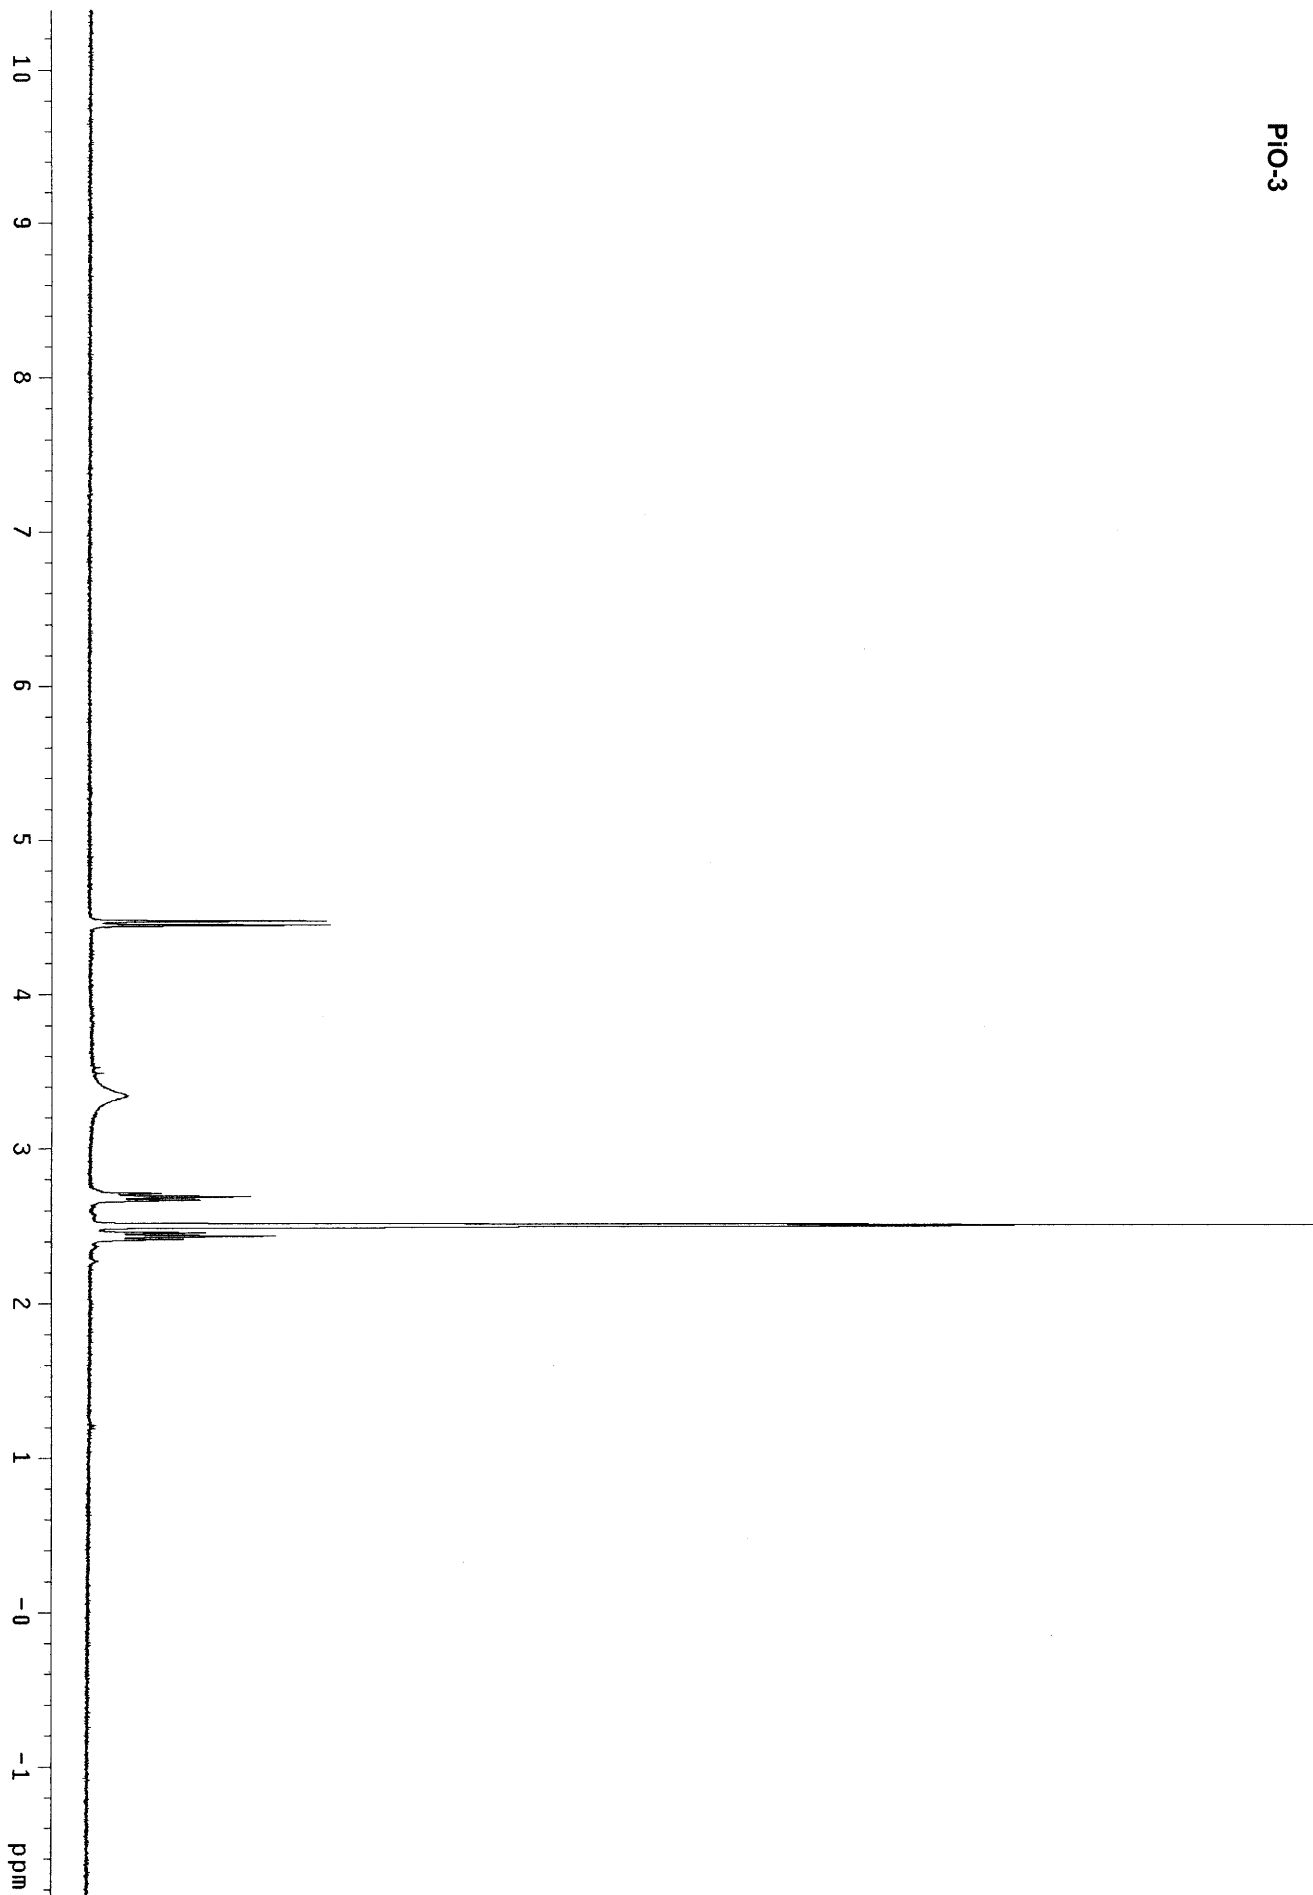

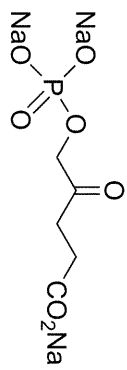

PIO-3

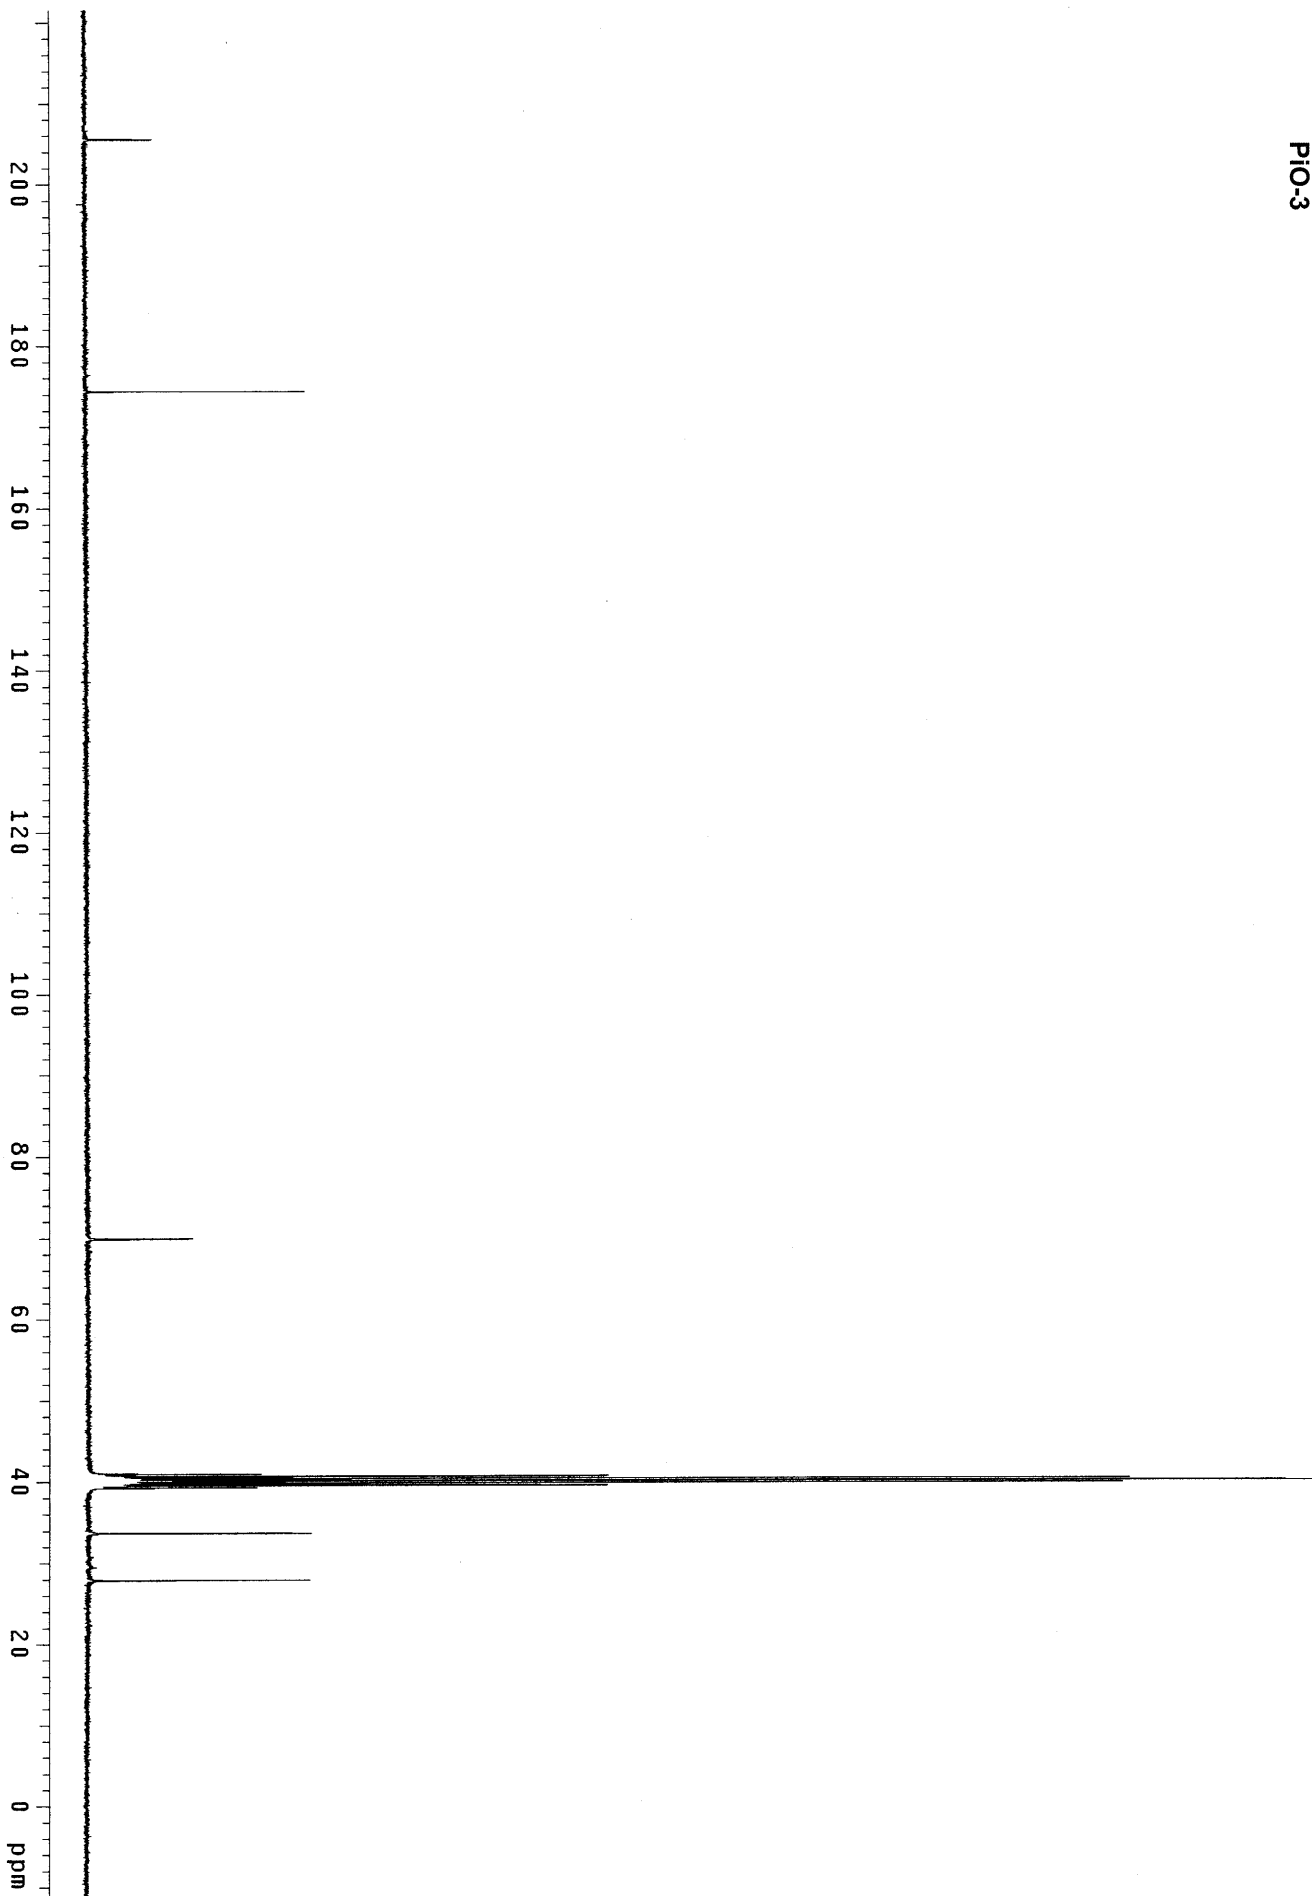

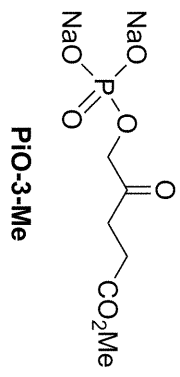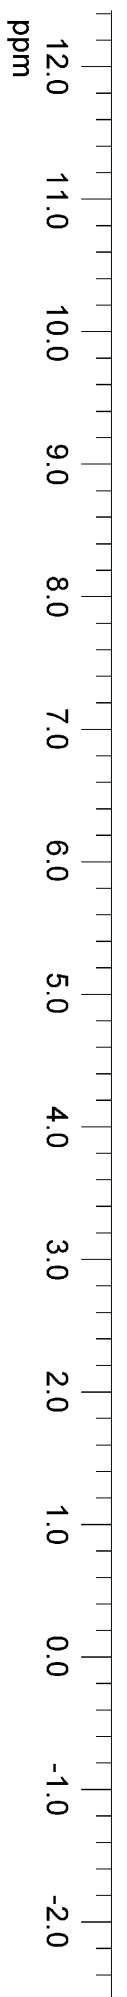

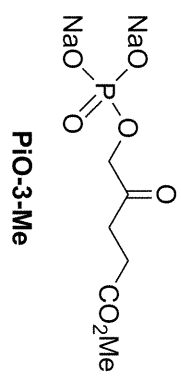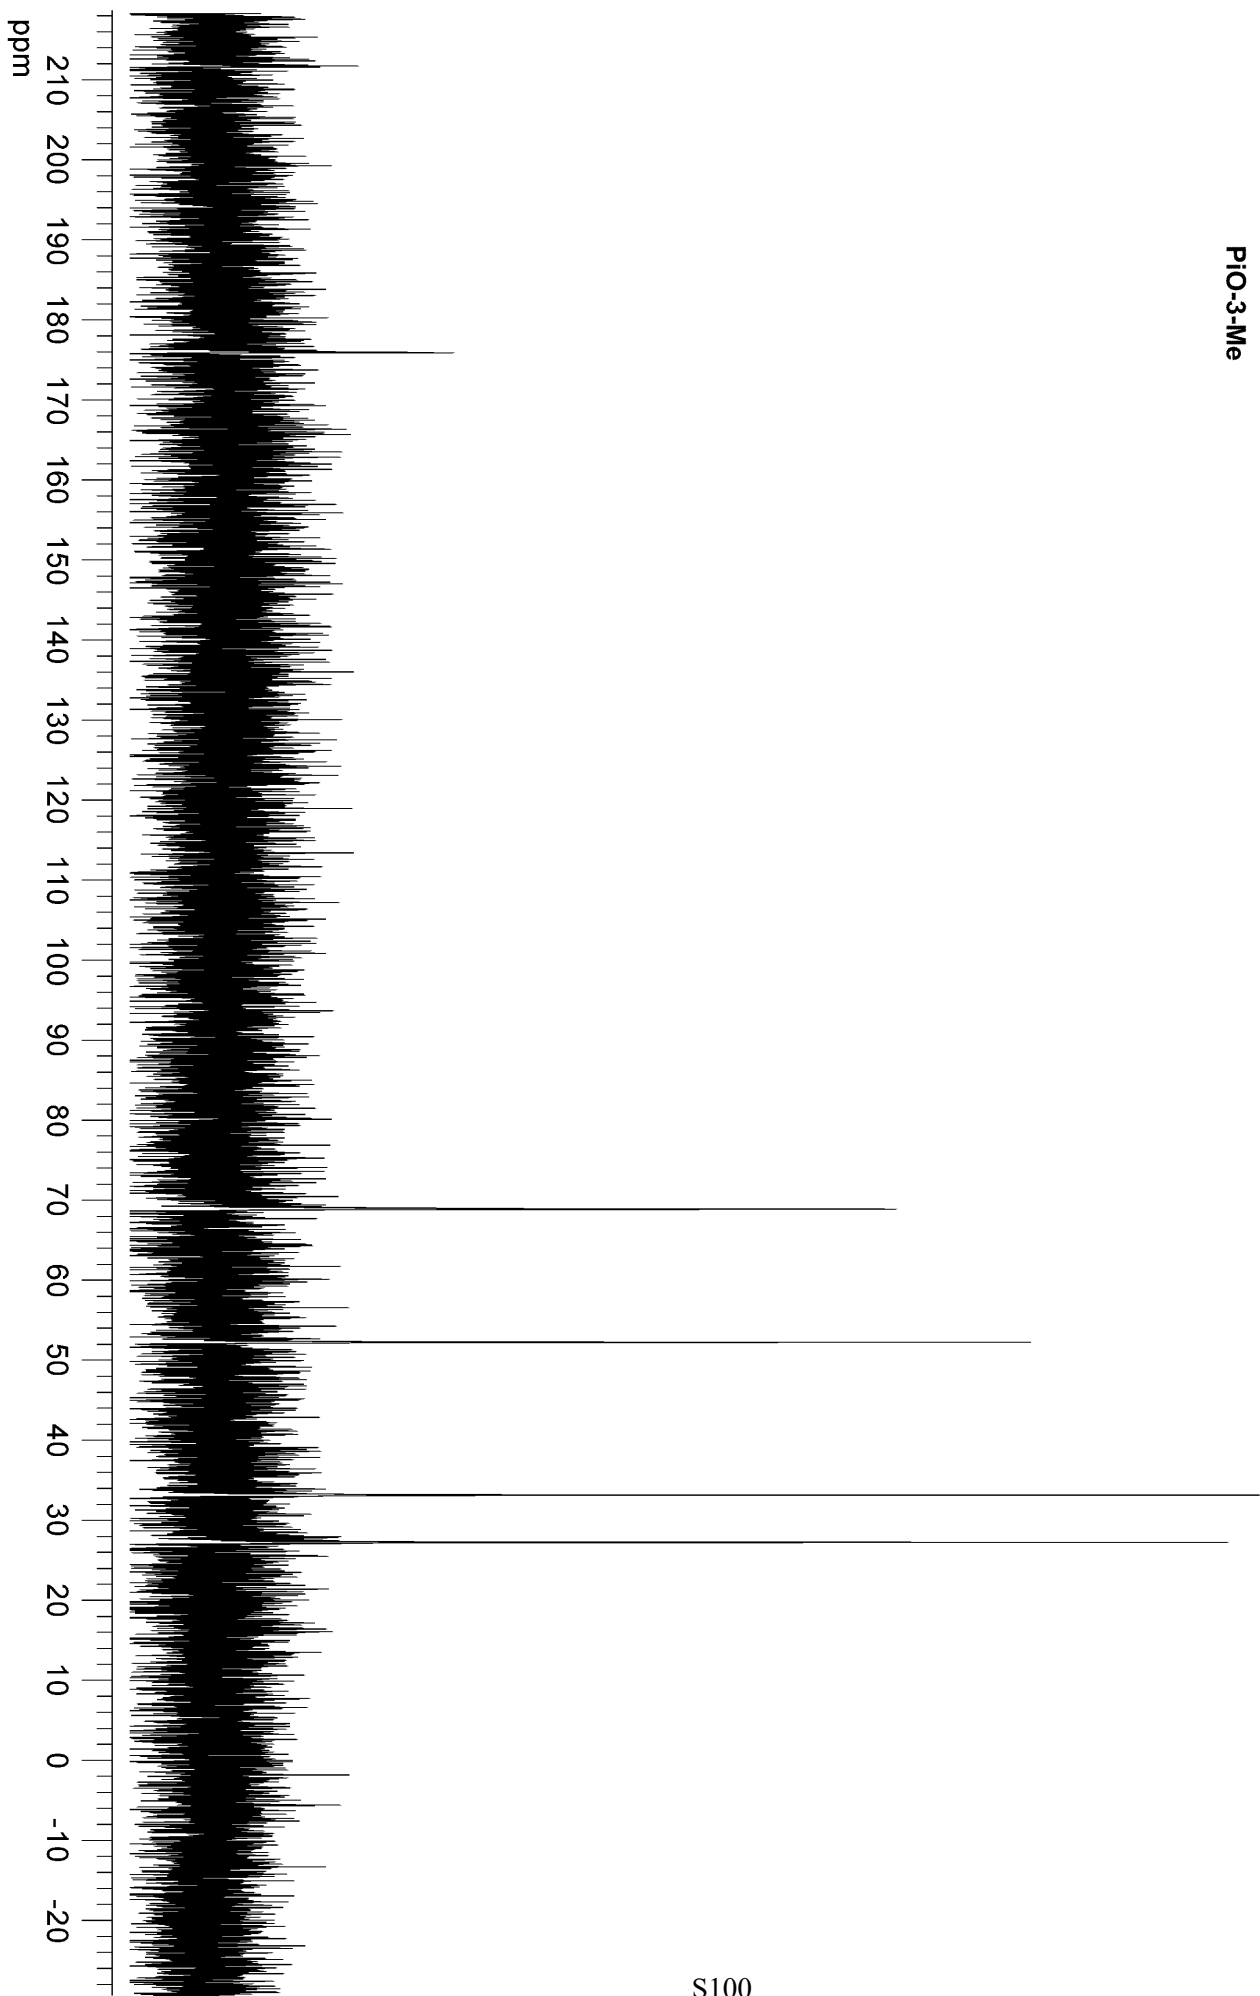

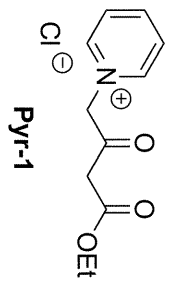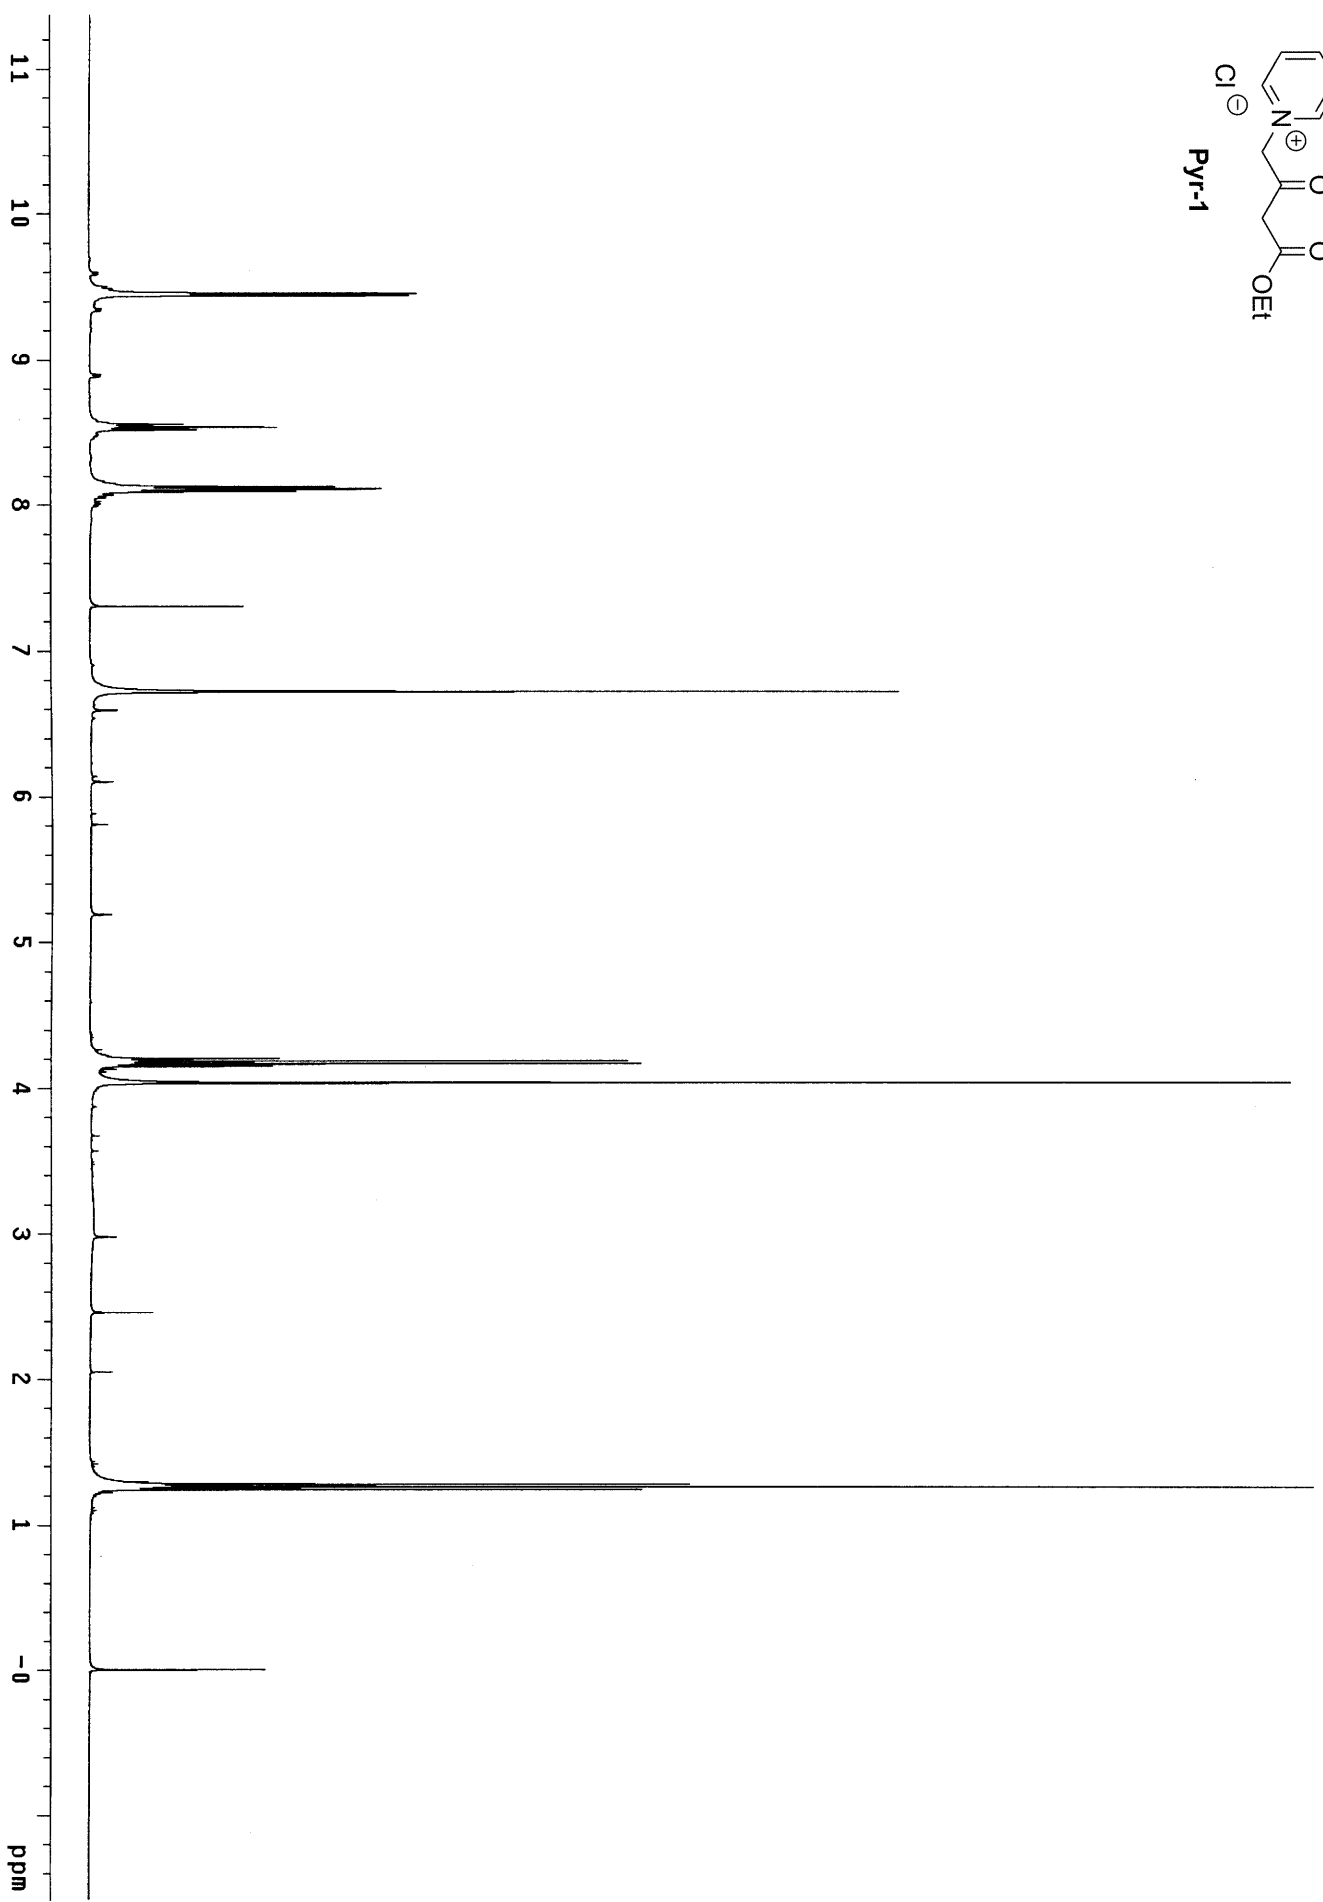

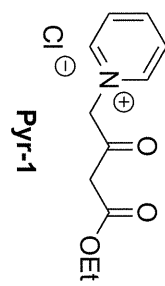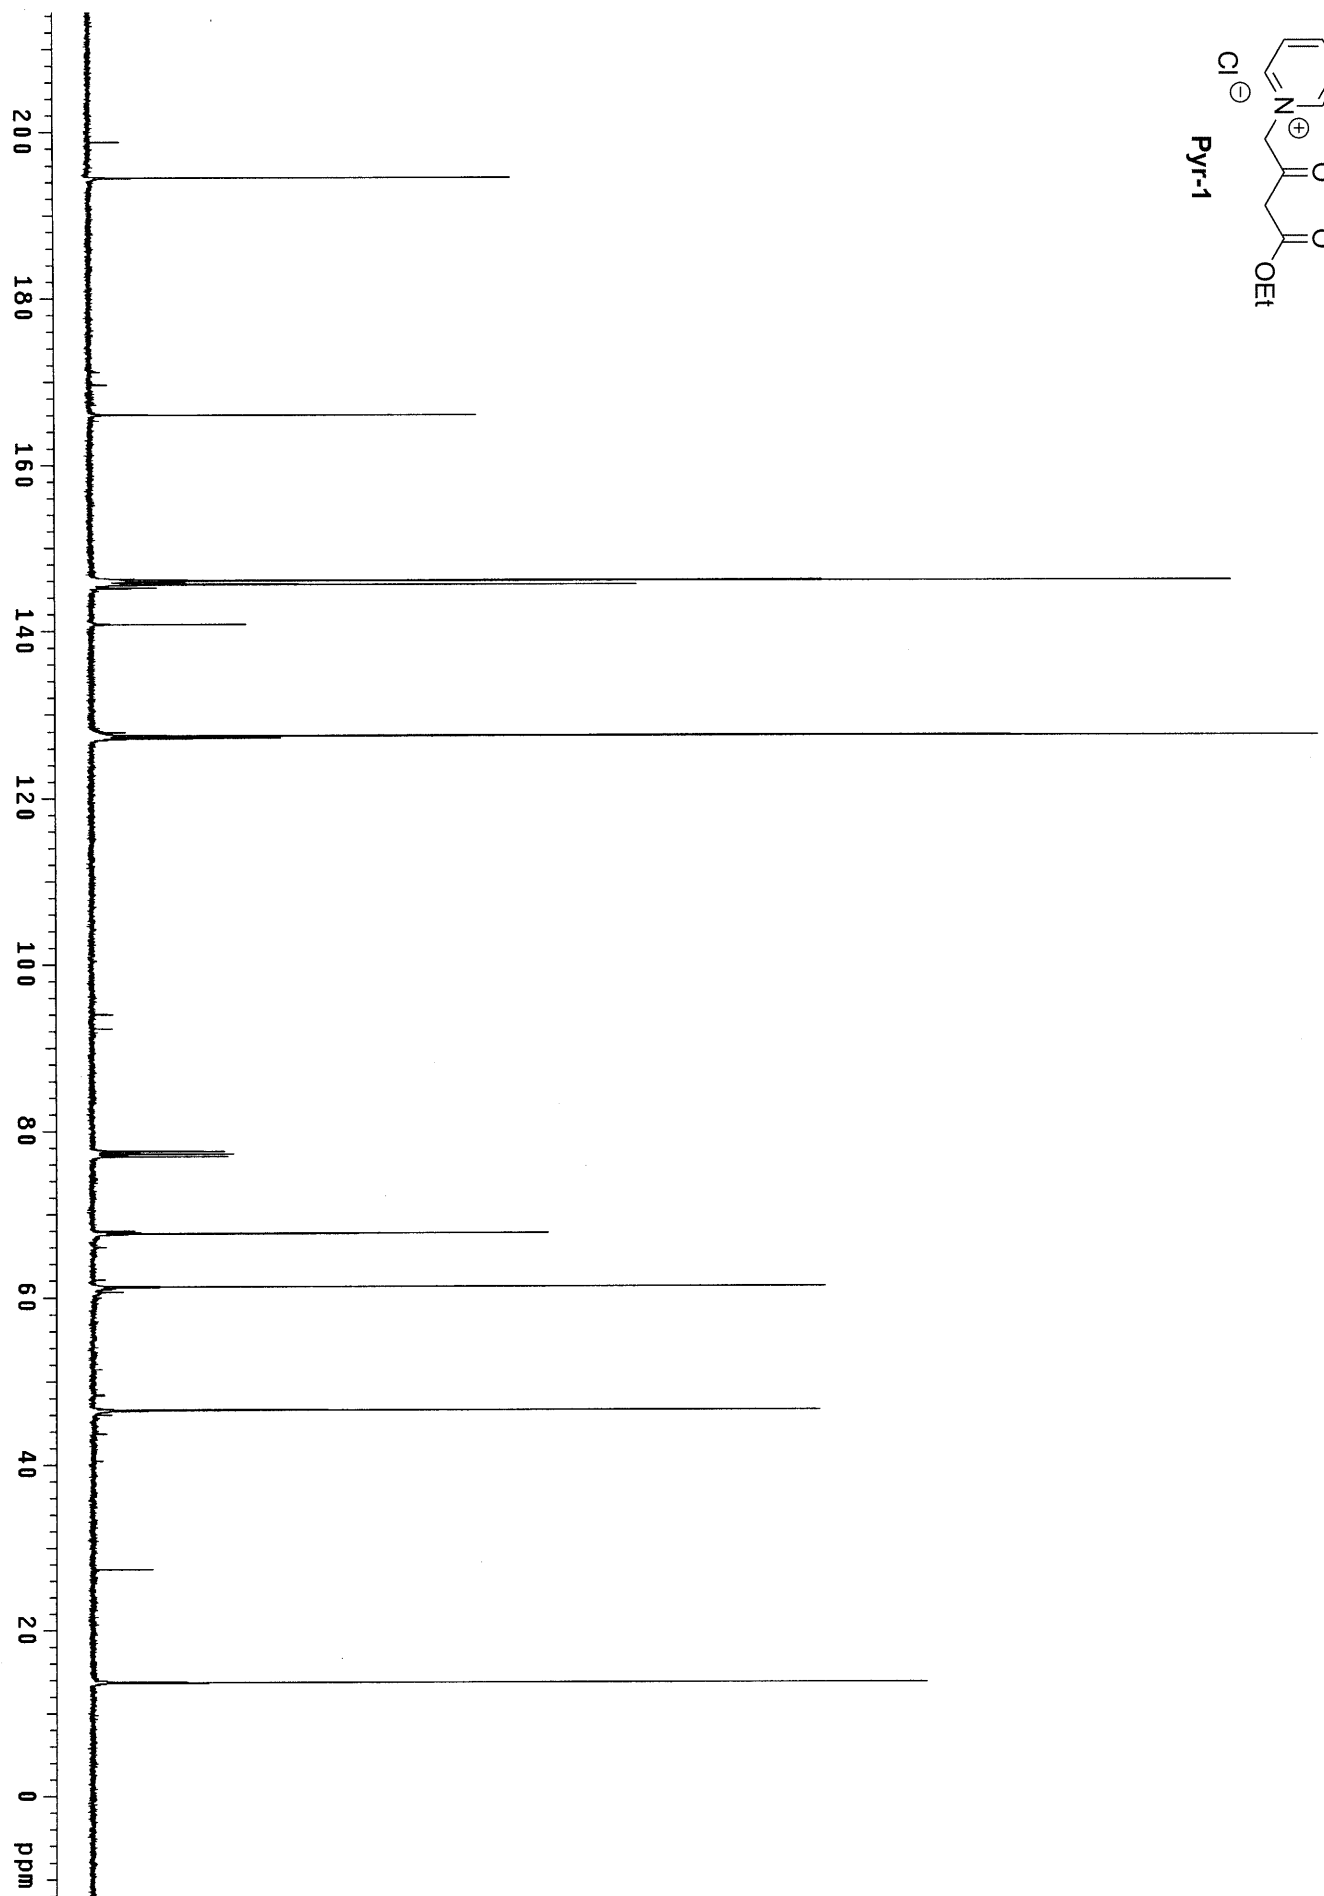

Supplement: c6nj02048h1.pdf [file c6nj02048h1.pdf]
